# Supplementary material for: Quantitative live-cell imaging and computational modeling shed new light on endogenous WNT/CTNNB1 signaling dynamics
Source: eLife. 2021 Jun 30;10:e66440. doi: 10.7554/eLife.66440 (PMC8341982; doi:10.7554/eLife.66440)
Supplement: Figure 2—source data 1. [file elife-66440-fig2-data1.xlsx]

## Sheet: Figure 2B - WB
Clone	Treatment	CTNNB1 level (normalized to TUBA) relative to DMSO control of the clone	SGFP2 level (normalized to TUBA) relative to DMSO control of the clone
parental WT	DMSO	1	NA
parental WT	4 μM CHIR	2.29578	NA
parental WT	8 μM CHIR99021	3.14126	NA
clone 1	DMSO	1	1
clone 1	4 μM CHIR99021	3.5329	3.52946
clone 1	8 μM CHIR99021	4.98154	9.99079
clone 2	DMSO	1	1
clone 2	4 μM CHIR99021	1.74595	2.27244
clone 2	8 μM CHIR99021	3.49196	4.42723
clone 3	DMSO	1	1
clone 3	4 μM CHIR99021	1.70744	1.6657
clone 3	8 μM CHIR99021	2.96526	3.58922
parental WT	DMSO	1	NA
parental WT	4 μM CHIR99021	2.441	NA
parental WT	8 μM CHIR99021	4.50802	NA
A2	DMSO	1	1
A2	4 μM CHIR99021	2.69149	2.67518
A2	8 μM CHIR99021	4.49534	4.04577
clone 2	DMSO	1	1
clone 2	4 μM CHIR99021	2.08551	3.7423
clone 2	8 μM CHIR99021	2.74632	5.20607
clone 3	DMSO	1	1
clone 3	4 μM CHIR99021	2.23726	2.60303
clone 3	8 μM CHIR99021	3.4596	3.81481
parental WT	DMSO	1	NA
parental WT	4 μM CHIR99021	2.72784	NA
parental WT	8 μM CHIR99021	4.5276	NA
A2	DMSO	1	1
A2	4 μM CHIR99021	2.19839	2.18586
A2	8 μM CHIR99021	3.96146	3.85668
clone 2	DMSO	1	1
clone 2	4 μM CHIR99021	1.29369	1.35826
clone 2	8 μM CHIR99021	2.13785	1.68344
clone 3	DMSO	1	1
clone 3	4 μM CHIR99021	1.24545	1.8901
clone 3	8 μM CHIR99021	2.78023	4.88839

## Sheet: Figure 2C - luciferase
clone	condition	Foldchange of Luciferase signal (corrected for Renilla signal) relative to DMSO control of the clone	standard deviation of technical replicate (not shown in figure)
parental WT	DMSO	1	0.204398
parental WT	4 μM CHIR	9.93033	1.32381
parental WT	8 μM CHIR	20.2958	0.980765
clone 1	DMSO	1	0.161308
clone 1	4 μM CHIR	12.6398	0.918338
clone 1	8 μM CHIR	18.5623	1.89752
clone 2	DMSO	1	0.0511035
clone 2	4 μM CHIR	12.5307	1.24376
clone 2	8 μM CHIR	33.3616	1.26808
clone 3	DMSO	1	0.0534221
clone 3	4 μM CHIR	7.45207	1.65744
clone 3	8 μM CHIR	18.9046	1.48428
parental WT	DMSO	1	0.0736478
parental WT	4 μM CHIR	14.9223	0.78672
parental WT	8 μM CHIR	36.6154	4.05689
clone 1	DMSO	1	0.126017
clone 1	4 μM CHIR	12.2913	0.206905
clone 1	8 μM CHIR	30.5443	1.23605
clone 2	DMSO	1	0.126098
clone 2	4 μM CHIR	4.64141	0.821366
clone 2	8 μM CHIR	29.0669	4.93127
clone 3	DMSO	1	0.27421
clone 3	4 μM CHIR	2.96862	0.408678
clone 3	8 μM CHIR	15.5066	2.97134
parental WT	DMSO	1	0.182309
parental WT	4 μM CHIR	7.80548	0.938603
parental WT	8 μM CHIR	46.1642	5.68302
clone 1	DMSO	1	0.00844903
clone 1	4 μM CHIR	6.81299	1.12844
clone 1	8 μM CHIR	34.6348	0.834719
clone 2	DMSO	1	0.0972101
clone 2	4 μM CHIR	4.47558	1.59297
clone 2	8 μM CHIR	39.037	4.58
clone 3	DMSO	1	0.200073
clone 3	4 μM CHIR	2.85889	0.176726
clone 3	8 μM CHIR	13.6209	1.13512

## Sheet: Figure 2D - qPCR
Clone	Treatment (24h)	foldchange of AXIN2 (normalized to HPRT) relative to DMSO control of the clone	positive standard deviation of technical replicate (not shown in figure)	negative standard deviation of technical replicate (not shown in figure)
parental WT	DMSO	1	0.244513	0.323649
parental WT	4 μM CHIR99021	7.05797	1.18105	1.4184
parental WT	8 μM CHIR99021	11.8548	1.31391	1.47769
clone 1	DMSO	1.26876	0.103605	0.112818
clone 1	4 μM CHIR99021	3.94865	0.288558	0.311308
clone 1	8 μM CHIR99021	4.91325	0.499257	0.555727
clone 2	DMSO	1.70838	0.0902953	0.0953342
clone 2	4 μM CHIR99021	8.3378	0.449299	0.474889
clone 2	8 μM CHIR99021	13.1503	0.889714	0.954278
clone 3	DMSO	1.21285	0.0595174	0.0625888
clone 3	4 μM CHIR99021	6.97066	0.342669	0.360386
clone 3	8 μM CHIR99021	7.91142	0.594822	0.64318
parental WT	DMSO	1	0.0561569	0.0594981
parental WT	4 μM CHIR99021	4.32107	0.227556	0.240205
parental WT	8 μM CHIR99021	6.67857	0.19111	0.19674
clone 1	DMSO	0.862202	0.0363975	0.0380017
clone 1	4 μM CHIR99021	2.28172	0.189276	0.206397
clone 1	8 μM CHIR99021	3.18003	0.200141	0.213584
clone 2	DMSO	1.69299	0.260126	0.307349
clone 2	4 μM CHIR99021	4.70506	0.604599	0.693745
clone 2	8 μM CHIR99021	6.99001	0.775975	0.872875
clone 3	DMSO	0.969447	0.0317091	0.0327813
clone 3	4 μM CHIR99021	2.01296	0.135435	0.145205
clone 3	8 μM CHIR99021	4.684	0.442243	0.488351
parental WT	DMSO	1	0.0878312	0.0962883
parental WT	4 μM CHIR99021	4.89539	0.332532	0.356766
parental WT	8 μM CHIR99021	10.3261	0.390384	0.405723
clone 1	DMSO	1.53715	0.19193	0.219313
clone 1	4 μM CHIR99021	1.83055	0.0733741	0.076438
clone 1	8 μM CHIR99021	4.62205	0.407487	0.446885
clone 2	DMSO	1.98364	0.18714	0.206634
clone 2	4 μM CHIR99021	4.11109	0.0923473	0.0944694
clone 2	8 μM CHIR99021	9.85074	2.1006	2.66995
clone 3	DMSO	1.47894	0.0712582	0.0748654
clone 3	4 μM CHIR99021	5.2204	0.141778	0.145736
clone 3	8 μM CHIR99021	10.0889	1.26891	1.45147

## Sheet: Figure 2 supp 1A - qPCR
Clone	Treatment (24h) with concentration CHIR99021 (μM)	Axin2 foldchange (normalized for HPRT and relative to 0 μM control)	positive standard deviation of technical replicate	negative standard deviation of technical replicate
parental WT	0	1	0.163625	0.195636
parental WT	1	1.64033	0.195569	0.222042
parental WT	2	1.7561	0.145135	0.158211
parental WT	3	1.75753	0.0719449	0.0750157
parental WT	4	4.07015	0.223955	0.236995
parental WT	5	7.14518	0.356773	0.375524
parental WT	6	13.2938	1.07832	1.1735
parental WT	7	15.0152	0.314355	0.321077
parental WT	8	16.4073	1.56163	1.7259
parental WT	9	15.212	1.06493	1.14509
parental WT	10	20.7192	6.61955	9.72732

## Sheet: Figure 2 supp 1C-D - WB
Clone	Treatment (24h)	Total CTNNB1 level relative to DMSO control	Active CTNNB1 level relative to DMSO control
parental WT	DMSO	1	1
parental WT	4 μM CHIR99021	1.96054	2.53173
parental WT	8 μM CHIR99021	3.30845	5.56338
