# Supplementary material for: Quantitative live-cell imaging and computational modeling shed new light on endogenous WNT/CTNNB1 signaling dynamics
Source: eLife. 2021 Jun 30;10:e66440. doi: 10.7554/eLife.66440 (PMC8341982; doi:10.7554/eLife.66440)
Supplement: Figure 4—source data 1. [file elife-66440-fig4-data1.xlsx]

## Sheet: Figure 4F
Example Curve (Measurement 10 Experiment SdM079C)					Residuals with 1-diffusion compoent model (inset panel) for all measurements of Experiment SdM079C)
Time (log10(ms))	G(t) Raw FCS curve	G(t) 1-diffusion compoonent Model Fit	Residuals		Time (log10(ms))	04 B10 BSA c1 cyto	05 B10 BSA c1 nucleus	06 B10 BSA c2 cyto	07 B10 BSA c2 nucleus	08 B10 BSA c3 cyto	09 B10 BSA c3 nucleus	10 B10 BSA c4 cyto	11 B10 BSA c4 nucleus	12 B10 BSA c5 cyto	13 B10 BSA c5 nucleus	14 B10 BSA c6 cyto	15 B10 BSA c6 nucleus	16 B10 WNT3A c1 cyto	17 B10 WNT3A c1 nucleus	18 B10 WNT3A c2 cyto	19 B10 WNT3A c3 cyto	20 B10 WNT3A c3 nucleus	21 B10 WNT3A c4 cyto	22 B10 WNT3A c4 nucleus	23 B10 WNT3A c5 cyto	24 B10 WNT3A c5 nucleus	25 B10 WNT3A c6 cyto	26 B10 WNT3A c6 nucleus	27 B10 BSA c7 cyto	28 B10 BSA c7 nucleus
-2.52288	1.21381	1.17643	0.783656		-2.52288	1.45181	1.40961	-0.694192	0.365444	0.68774	4.04793	-0.0297723	2.23867	-1.09844	0.234217	0.234217	0.438902	-0.00352034	2.73963	-0.281363	1.81253	2.09865	-0.201928	-0.776315	0.808202	0.401392	2.25553	0.0168346	-0.855563	0
-2.45593	1.10113	1.16302	-1.58074		-2.45593	0.424025	-0.974913	-0.0795783	0.785683	0.183565	1.10628	0.0310932	3.64064	0.0311713	-0.923144	-0.923144	-0.467941	-0.0224747	-0.799707	1.0988	0.178782	-1.46701	-0.556167	-0.375864	1.66873	1.09956	0.859304	0.602719	-0.0808672	0
-2.39794	1.20401	1.15084	1.79316		-2.39794	-0.497332	2.41192	0.5313	1.34103	-0.582911	2.37244	-0.00743514	0.741141	1.0788	0.283484	0.283484	0.931075	0.0127512	-2.19849	0.75358	0.339598	0.565096	-0.347976	-1.53788	0.678145	-0.130495	1.11326	0.454083	0.854566	0
-2.34679	1.15747	1.13977	0.377935		-2.34679	-2.0857	0.669903	0.0654167	0.547344	-0.161067	0.387285	-8.5e-06	-1.09367	0.594151	0.0769963	0.0769963	-1.07589	-0.00190937	-0.489533	0.486308	0.298639	-0.407357	2.42379	2.34639	0.0582185	-1.31877	0.276495	-1.90311	0.68435	0
-2.30103	1.08398	1.12972	-1.24724		-2.30103	-0.324737	-0.985161	-0.0495537	-1.42891	1.8525	-0.403413	0.00873998	1.02877	-0.76872	0.662982	0.662982	0.773861	0.00685035	-2.16084	-1.03951	-0.471278	-0.961983	0.0889767	0.381927	-1.15866	-1.20687	0.0107261	1.01834	-0.10941	0
-2.25964	1.0901	1.12059	-0.748721		-2.25964	-1.34467	-0.598968	0.205675	-1.96963	-1.72972	-0.34341	0.012962	0.0563093	-1.33812	-1.74875	-1.74875	-0.522474	-0.00611448	-0.897043	-1.85575	-0.488718	-1.50309	-0.248641	-0.143815	-1.1147	0.480372	-1.29056	-0.405235	-0.374934	0
-2.22185	1.12685	1.1123	0.494781		-2.22185	-0.324099	0.599189	-0.281203	-0.149661	-0.712311	0.401095	-0.016303	-2.32634	-0.456829	0.646427	0.646427	0.0265909	0.020005	-0.977475	-1.79733	1.3049	2.49758	0.71193	0.731636	-0.700299	-0.350996	0.443269	-1.07446	1.61124	-0.305675
-2.18709	1.07418	1.10476	-0.72729		-2.18709	0.437549	-0.715988	-0.597042	-2.14447	0.884539	2.58865	0.0226204	-0.0965482	0.524668	1.75174	1.75174	-0.643493	-0.00066056	-0.572265	0.655475	-0.196988	-0.226115	0.415921	0.996568	0.901556	-0.193305	-1.26311	-0.940779	0.308698	0.400464
-2.1549	1.11338	1.09792	0.397004		-2.1549	0.374667	0.352372	1.7903	-0.814893	0.0661077	0.942514	-0.0516766	-0.931435	-0.699919	1.54151	1.54151	-0.688378	0.0262569	-0.382046	0.523402	0.149921	0.0186458	-0.289703	0.887291	1.63123	-1.06062	-0.0596904	1.14309	-0.18344	-0.176259
-2.12494	1.09623	1.0917	0.147373		-2.12494	-2.66577	0.0297165	-0.343429	-0.0327566	-0.600569	-0.544905	0.055458	-0.504639	0.0794801	0.917609	0.917609	0.551457	-0.00648179	3.56414	0.855298	-0.532471	-1.15372	1.116	-1.65527	-0.047599	0.0739083	-0.685381	-0.342903	-1.45208	-0.119633
-2.09691	1.06867	1.08606	-0.607037		-2.09691	-0.911238	-0.788126	0.0517522	0.808163	-2.01641	0.590593	0.0372662	-1.74371	-1.20482	0.724059	0.724059	-2.14045	-0.0070911	0.107995	1.73493	-0.463105	-1.40257	-2.54518	0.229041	0.0647124	-0.253045	-0.159789	-0.505189	-0.608194	-0.711123
-2.04576	1.09439	1.07627	0.592554		-2.04576	2.1282	0.344782	1.43634	1.93134	0.653013	0.772481	-0.00706731	-0.0313691	0.180857	0.791577	0.791577	-0.310613	0.000855195	-0.182497	-0.535031	-1.31581	-2.18896	0.29074	-0.470353	0.0766543	-1.05944	-0.866718	1.53768	0.537598	-1.50172
-2	1.065	1.06819	-0.148665		-2	-1.60652	-0.574488	0.0275675	-1.02972	1.34788	2.17125	-0.0351817	-2.5149	0.729778	2.72561	2.72561	0.300532	-0.00728012	0.611576	-2.78979	-0.802426	0.955514	-0.826635	0.00235021	-1.67695	0.0543792	-1.49028	-1.42293	-0.567431	-0.648503
-1.95861	1.04417	1.06152	-0.618199		-1.95861	-0.609742	-0.977919	-0.958932	-0.084401	0.412036	-0.7235	-0.0273635	0.290029	1.4543	1.62943	1.62943	0.987825	-0.00862414	1.22227	-0.731599	-1.61898	-1.21559	0.0623287	-1.54581	0.410187	0.574998	0.871359	1.74693	-0.816597	-2.4971
-1.92082	1.0454	1.05602	-0.489693		-1.92082	3.24954	-0.976701	-2.70766	-0.0841019	1.39905	-1.12318	0.00808157	0.397774	1.26274	0.465752	0.465752	0.202988	-0.0131409	0.0978896	0.682864	-0.0619599	0.711054	1.15137	-0.121668	-0.293514	-0.00630826	-0.37583	0.628446	-1.75383	-1.67594
-1.88606	1.06867	1.05148	0.611509		-1.88606	1.24936	0.231389	-0.762301	0.546942	-1.02016	-1.5387	-0.0221554	-0.381296	-1.73769	1.50997	1.50997	1.90571	0.0147104	-0.301087	0.589855	-1.1293	-0.520684	3.04945	-1.25974	-2.35247	1.43618	0.208302	2.85556	0.919343	-1.13142
-1.85387	1.03192	1.04774	-0.642629		-1.85387	1.94343	-1.07097	1.02828	-0.986763	0.116912	-2.23436	-0.0193781	0.586533	0.986959	1.12261	1.12261	0.728488	0.00864249	0.790908	1.57126	-0.204713	-0.141296	0.868984	0.180246	0.138852	-0.747712	-0.134639	0.661981	0.648361	-0.323455
-1.82391	1.03927	1.04465	-0.286346		-1.82391	-0.432111	-0.83062	0.438599	1.05341	0.959756	-1.81796	0.000435453	-3.00142	-1.67014	0.900541	0.900541	-0.234774	0.00285257	-0.233247	-0.053275	-1.31077	-0.353399	-0.447601	0.724175	-1.77559	-0.222782	-0.000478567	-0.657127	-0.0128802	0.593328
-1.79588	1.04724	1.04209	0.201808		-1.79588	0.892362	-0.181127	1.41834	3.06988	-0.067851	-1.64852	-0.000528518	-0.588691	0.580483	1.68756	1.68756	0.483428	-0.0108365	-0.909825	-0.351007	-1.17356	-0.0483948	-0.781102	-0.210411	0.512009	0.881487	0.768039	1.74772	-0.346652	0.29788
-1.74473	1.02856	1.03825	-0.820267		-1.74473	0.650873	-1.55031	-0.00385054	3.3935	-0.0870487	-0.344076	0.00497732	1.54395	0.0556583	1.12568	1.12568	0.248249	-0.00277712	-0.569902	0.983519	-1.39806	0.375293	-1.03012	2.24694	-1.0036	-0.486467	-1.20461	0.320954	0.810384	-1.08847
-1.69897	1.0454	1.03563	0.406365		-1.69897	-0.273991	0.098358	-0.241246	-2.37587	1.09735	0.491294	0.0105801	0.479922	1.15063	-0.0053841	-0.0053841	-1.73721	0.00168287	-1.38317	-0.264059	-0.622816	1.62917	0.493453	-0.327269	0.387701	-1.29703	-0.340451	0.524926	1.04539	-0.928995
-1.65758	1.04877	1.03385	0.876593		-1.65758	2.00946	0.511493	1.60482	0.497509	-1.82706	-0.483799	0.00732702	-1.90121	-1.65593	3.59492	3.59492	1.87711	-0.00988154	1.36137	-0.346588	3.19333	2.08109	0.565132	0.721531	1.5011	0.957922	-2.24925	0.591863	0.431435	0.0388985
-1.61979	1.0751	1.03263	2.19768		-1.61979	0.430108	1.93218	-0.268215	0.596473	0.303873	-0.955737	0.00420047	0.268117	-0.257598	1.14406	1.14406	0.897861	-0.010624	-0.747871	0.881174	1.69988	0.901623	0.988711	1.26284	-0.283426	0.919513	-1.43943	0.686202	1.22767	1.02841
-1.58503	1.10633	1.0318	3.80315		-1.58503	0.0422407	3.58977	0.784815	-2.37581	-0.268199	1.33312	-0.0221155	2.11585	-1.01089	1.12341	1.12341	0.0559676	-0.0067626	-0.272797	-0.488782	0.571685	3.22446	0.477038	0.28254	-0.738103	1.38845	2.5758	0.206684	2.27144	-0.453224
-1.55284	1.03101	1.03123	-0.0185112		-1.55284	1.75689	-0.294236	-0.184352	0.573921	0.00214839	-2.3149	-0.00234103	1.20273	1.75002	-0.366443	-0.366443	0.808375	0.000416128	1.54977	1.58005	-1.25615	1.79306	-0.262342	1.10053	1.99634	0.599839	-0.709986	-0.168559	-2.22811	-0.856611
-1.52288	1.0503	1.03084	1.1684		-1.52288	-0.698616	1.00658	0.305926	-1.61994	1.09159	-1.18613	-0.0106705	0.788147	0.104217	1.05235	1.05235	1.69805	0.0186428	-2.50236	0.13645	0.934129	0.315923	1.26136	-0.572372	-1.01536	-1.15486	-0.0598369	0.763263	1.33731	0.179826
-1.49485	1.05428	1.03058	2.61332		-1.49485	-1.06447	2.37791	1.01393	-1.06997	-0.45578	-0.514761	0.00944355	-0.328524	0.771408	1.82542	1.82542	1.00691	0.00250237	-0.192106	1.95031	0.453205	1.37604	-0.0375128	-1.09733	0.208648	0.651263	1.46025	1.62315	1.73544	-0.00419731
-1.4437	1.03162	1.03027	0.0969857		-1.4437	-0.126176	0.00283903	-0.139732	1.20188	0.370192	-1.41361	0.0195314	0.857688	0.0383854	-0.00254599	-0.00254599	0.792052	-0.00908177	-0.725168	0.450314	1.47437	1.70873	0.451612	-0.132154	1.12296	0.985106	0.968694	1.21498	2.0934	1.21943
-1.39794	1.04938	1.03012	1.35566		-1.39794	-0.0393911	1.30105	-0.270536	-0.649608	1.20457	-1.8386	0.0046222	-0.607098	-0.420237	3.34282	3.34282	2.32782	-0.00400616	-0.0970332	1.17614	0.272293	0.641366	-1.21049	-0.414176	0.167689	0.625207	0.0977525	5.00309	0.107812	-0.62494
-1.35655	1.04815	1.03005	1.34482		-1.35655	-1.69866	1.31225	0.352283	-0.890294	-0.123297	0.523725	0.0127555	0.544246	1.36081	-0.0207761	-0.0207761	0.286091	0.000118251	-1.11729	0.976514	2.09143	0.791937	-0.0726608	2.0352	0.699092	0.433418	1.72917	0.118619	0.874728	1.36416
-1.31876	1.0333	1.03	0.213581		-1.31876	1.9154	0.198789	0.0400103	-0.432523	0.893244	-0.112388	0.00297407	-0.56146	-1.00014	1.76486	1.76486	0.491098	0.00321625	0.0133595	0.801449	1.54765	-0.167183	0.962562	-0.09133	1.38075	0.4841	0.760955	1.59415	-2.16941	-2.26501
-1.284	1.04417	1.02998	1.11949		-1.284	-2.07022	1.11169	-0.280345	1.23658	0.999042	0.815816	0.00867224	1.32038	-0.094161	0.108616	0.108616	0.0629459	0.00735961	-1.18158	0.945324	0.752307	2.15366	0.986912	-0.306572	0.310499	-0.261412	-0.417395	0.0974099	0.525217	1.04625
-1.25181	1.03162	1.02996	0.114977		-1.25181	-0.307117	0.11361	-1.05696	0.249211	0.609084	0.187685	0.0316913	0.850834	3.05128	0.716975	0.716975	-0.113102	-0.00101086	0.290586	1.29449	1.89505	-0.522504	-0.230835	1.94117	0.536907	-0.268034	-1.06789	0.606708	2.37555	0.106348
-1.22185	1.0281	1.02995	-0.168751		-1.22185	-0.62623	-0.16616	-0.600742	-1.40044	0.939741	1.12855	0.0051854	0.0175721	1.84369	0.391004	0.391004	0.42129	0.01138	1.1172	1.43564	1.72926	-0.303007	1.28617	-0.850811	2.66564	-0.725353	0.684235	0.332192	1.34314	-0.101326
-1.19382	1.03192	1.02994	0.232662		-1.19382	0.763862	0.239395	3.15335	-1.46438	1.76807	0.507928	0.00719925	0.66629	0.26152	3.04837	3.04837	-0.0496382	0.00616782	0.559861	0.791702	-0.784542	2.11943	0.991148	0.702524	3.52843	1.23285	0.760354	1.04738	2.2215	1.46915
-1.14267	1.03361	1.02991	0.287943		-1.14267	0.712162	0.294608	-0.697211	1.56233	-0.449829	-0.432855	0.0269692	-0.770354	-0.57856	0.641472	0.641472	0.135843	0.00398635	1.05486	-0.155976	-0.68633	-0.194668	1.05712	1.74047	3.06906	0.264873	0.149018	1.2805	-1.2276	2.24731
-1.09691	1.049	1.02989	2.14976		-1.09691	2.23818	2.1605	-0.429607	1.79144	0.217838	0.155625	0.00712335	0.788838	-0.0773081	0.293661	0.293661	0.183157	0.0036651	0.375626	0.189626	-0.738424	0.668033	1.36096	2.29741	2.07348	2.5186	0.920636	2.51654	-0.00583655	-0.592049
-1.05552	1.0359	1.02987	0.711447		-1.05552	0.578946	0.723097	-0.377882	-0.458652	0.27708	-1.63011	-0.0109323	-1.32203	-0.0450167	-0.327061	-0.327061	1.31567	-0.000586486	-1.40166	2.57406	3.2269	2.24579	-0.80767	-0.883931	0.114005	-0.563284	2.26633	0.859781	-0.475476	0.0729061
-1.01773	1.03721	1.02985	0.969627		-1.01773	-1.36225	0.982783	-2.11527	1.2034	-0.394047	0.347012	-0.00157435	1.67878	-2.00568	1.07346	1.07346	-0.522097	-0.0011837	1.24432	0.549131	-0.536527	0.498887	0.916774	0.24037	-1.05414	1.15095	0.227714	0.398815	0.358212	0.208311
-0.982967	1.03751	1.02983	0.754287		-0.982967	1.74048	0.7641	-0.487465	1.2625	-1.28829	-0.151718	0.00185966	2.3413	1.26829	-1.88099	-1.88099	0.311408	0.00295296	0.502209	1.2578	0.169512	1.48875	0.880925	0.600299	0.570679	1.52026	-0.156654	-0.174374	0.708123	1.4221
-0.950782	1.0294	1.0298	-0.0503887		-0.950782	1.32724	-0.0380015	0.631877	0.845689	3.71792	0.286571	0.00236003	-0.0320911	1.06465	0.629362	0.629362	0.646049	-0.00818743	1.2016	1.03989	1.74738	-0.188894	0.673433	-0.21949	-1.24385	0.508482	2.33054	3.35756	-0.81377	-1.41901
-0.920819	1.04547	1.02978	1.94945		-0.920819	-0.167996	1.96183	-0.680766	-0.204793	1.97898	1.61644	0.00570396	0.421914	-0.0640247	2.22207	2.22207	1.65115	-0.000444808	-1.3003	1.46261	0.605521	-0.584812	-0.186461	-2.06248	0.752326	-0.405805	0.835338	-0.656043	4.09492	1.4675
-0.89279	1.03261	1.02976	0.452494		-0.89279	-1.34822	0.46825	0.923795	-0.714438	1.14339	0.675299	-0.00801326	-0.910254	0.448445	2.09648	2.09648	2.63347	-0.00356469	0.232157	0.260209	0.759527	1.41359	0.233628	-0.520167	-0.40367	2.21993	1.20865	1.90208	1.28733	1.32998
-0.841638	1.02737	1.02972	-0.450637		-0.841638	2.10611	-0.431696	-0.315665	-0.437187	-0.674071	2.07998	-0.0114054	1.43223	-0.213455	1.2866	1.2866	1.29265	0.000975776	0.602287	2.0864	1.88265	1.58187	-0.374282	1.22646	2.54771	2.37722	1.79882	0.348048	1.87554	0.158271
-0.79588	1.04015	1.02967	1.9987		-0.79588	0.352566	2.01741	0.108326	0.2321	2.10595	-0.266421	0.000548633	0.933171	0.722634	0.576685	0.576685	1.158	-0.00223056	-0.276834	0.295593	0.956545	0.0818645	-1.81407	-1.02141	0.665227	2.25239	1.21679	0.117833	0.200076	1.13122
-0.754487	1.03154	1.02963	0.344842		-0.754487	-0.137066	0.362444	-0.818485	0.451023	0.114644	1.37017	0.00239618	1.64534	-0.313919	-2.73628	-2.73628	0.665729	-0.000665828	-2.24519	1.4409	0.516017	1.51115	-0.783189	0.214541	0.708455	-1.23093	3.44838	-1.04223	2.10263	2.66576
-0.716699	1.03349	1.02959	0.816908		-0.716699	0.455265	0.837174	1.33107	0.142426	0.935873	0.530574	-0.00514411	-0.446462	-0.961475	-0.296212	-0.296212	-0.143443	0.00241781	-0.0374793	-0.224229	-1.27033	1.10799	1.09881	1.37969	3.08441	0.501583	-0.601181	0.63975	0.499178	1.05795
-0.681937	1.03935	1.02954	1.21337		-0.681937	0.115269	1.22528	-0.602183	0.513976	0.173435	0.526	0.00600342	1.97615	1.00802	0.345708	0.345708	0.775467	0.002675	2.026	0.71078	1.20761	0.347896	0.442526	2.05112	0.813792	0.969756	-0.454763	1.20947	1.26787	0.16472
-0.649752	1.04846	1.0295	3.21602		-0.649752	0.372603	3.23224	-0.348982	1.10674	-0.502532	0.286995	0.000805681	0.47763	-0.25399	-0.316345	-0.316345	-0.294476	-0.00106862	0.359519	0.481884	0.0541839	0.809336	0.177996	1.86344	1.37508	0.724698	2.21888	0.940276	-1.16013	0.515671
-0.619789	1.03874	1.02946	1.13244		-0.619789	1.43529	1.14404	0.219554	2.95068	1.00565	0.00779054	-0.0111499	0.932947	-0.594526	0.178258	0.178258	0.192052	0.00183239	-1.1892	0.304215	1.04408	0.976017	0.323685	0.792504	-0.316828	-0.753207	1.35274	1.11007	0.629088	1.63605
-0.59176	1.03629	1.02942	1.97958		-0.59176	-0.121042	2.00678	0.841625	1.17038	1.81633	0.696672	-0.00698273	-0.329694	0.291252	0.636189	0.636189	-0.707208	-0.000111518	0.223936	0.519829	-0.0392491	1.66183	0.00724743	1.3357	0.374552	0.316502	1.12933	1.27007	0.630657	0.753059
-0.540608	1.0308	1.02933	0.272348		-0.540608	0.847947	0.28966	-1.3461	0.40339	0.768693	0.614325	-0.00547947	1.07224	0.126226	-0.8198	-0.8198	1.32535	0.000425044	0.528004	3.3747	-0.395619	0.945923	-0.436508	1.41021	2.74409	0.220455	1.41384	2.43551	0.144795	1.44892
-0.49485	1.03153	1.02925	0.434855		-0.49485	1.46754	0.452417	0.338325	-0.511582	2.75676	-1.1003	-0.0028178	-0.609111	0.287458	-0.247059	-0.247059	-1.2048	0.000556944	-0.382921	-0.758798	1.15462	0.0736642	0.490817	-0.709551	0.296208	0.0466851	1.20232	1.33709	0.592576	0.461003
-0.453457	1.03048	1.02917	0.326129		-0.453457	1.43607	0.348757	-3.42529	-0.885461	-0.0861399	0.988474	-0.00395644	1.45988	-0.866924	-1.10054	-1.10054	-0.221897	0.000482203	1.98087	-0.43442	-0.104677	2.69873	0.0402129	1.41254	0.297706	0.759255	-0.604932	1.5403	0.73617	4.02373
-0.415669	1.04158	1.02908	5.1518		-0.415669	-0.0158634	5.18883	0.368662	0.36404	0.36696	-0.585885	-0.00439538	0.127886	-2.50786	-0.524161	-0.524161	-0.625962	0.00249617	1.78182	0.185863	-0.0529779	1.89249	0.554951	-0.0142426	1.3947	2.42033	2.06089	0.549209	0.235743	1.77905
-0.380907	1.03348	1.029	0.668149		-0.380907	1.75692	0.681375	-1.1379	-0.229135	0.497564	1.19905	-0.00288306	1.985	-0.665235	3.69378	3.69378	1.34815	-0.00210698	-0.161814	0.229478	-0.129566	-0.0835287	0.722364	0.683429	1.29869	1.19089	2.51672	-1.54834	-2.6069	0.877742
-0.348722	1.03743	1.02892	2.23047		-0.348722	-0.286111	2.25343	0.461749	-0.333987	0.248489	1.28603	-0.00238052	-3.12149	0.893179	2.01865	2.01865	0.967237	-0.00278257	1.07884	0.608485	0.546927	1.34849	-2.28793	0.317694	1.26065	2.20823	1.5266	-0.557624	1.37354	-0.670555
-0.318759	1.04064	1.02884	2.57194		-0.318759	-1.11364	2.59078	0.0595626	-0.0297707	0.764376	-0.372497	0.00387414	1.14378	0.0464428	0.109346	0.109346	-1.69515	-0.000723779	0.19368	0.117488	-0.51244	0.0443087	0.156184	2.52795	0.126467	-0.305529	4.14826	0.436148	-0.354823	-0.740957
-0.29073	1.0338	1.02876	2.20198		-0.29073	1.00987	2.23925	0.192712	-0.652352	0.815634	0.820926	-0.00275048	0.758854	-0.416898	-0.517976	-0.517976	0.560717	-0.00106403	-0.449193	-1.59062	-0.316724	0.233044	-0.860792	-0.220653	1.23427	1.49654	1.20295	-1.17008	-0.208021	-0.457973
-0.239578	1.02801	1.0286	-0.142585		-0.239578	-1.88978	-0.122417	-0.843666	0.842264	1.18067	2.39619	-0.000437995	0.177969	0.397679	0.374551	0.374551	0.00310472	0.00318823	-0.0778468	1.04699	0.399242	-0.284446	-0.0921532	0.836789	2.44712	0.627778	1.93393	1.64947	1.05794	0.452204
-0.19382	1.03237	1.02844	1.008		-0.19382	2.45096	1.02883	-0.77211	0.474895	2.01495	1.79352	-0.00631068	-0.0793914	0.4187	1.33532	1.33532	-0.970644	-0.00137374	-0.770847	0.205213	-0.983888	1.01781	-0.524002	-0.658265	0.155885	2.16525	-0.402875	0.584198	0.468741	0.395679
-0.152427	1.02995	1.02829	0.394255		-0.152427	1.97076	0.412938	0.0478771	0.775122	0.24606	-0.333379	0.00284737	-1.67003	-0.103395	-0.325761	-0.325761	-0.125708	-0.000121216	0.313369	0.145038	0.0678651	3.28854	-0.406475	-0.454256	1.3364	0.31101	2.09194	-0.380299	-1.67917	0.686023
-0.114639	1.02488	1.02813	-0.743428		-0.114639	-1.05227	-0.725807	-0.338405	-1.39266	2.47649	0.673449	-0.00386303	0.36056	-1.493	-0.763317	-0.763317	-0.906116	-0.00246513	-0.16261	0.440142	-0.0756776	1.54501	-0.501134	0.945071	-0.365151	0.243447	-1.47488	0.548051	1.48787	0.828238
-0.0798767	1.02721	1.02798	-0.196554		-0.0798767	0.0729735	-0.177503	0.192807	0.427254	-1.65428	1.12774	0.000919614	-0.950286	0.368615	-1.49955	-1.49955	0.222741	-0.000594312	0.815466	-1.99839	0.449251	0.894419	0.37308	0.775046	0.207438	1.4602	0.0511773	0.387472	0.764706	0.604393
-0.047692	1.03257	1.02783	1.33249		-0.047692	0.912304	1.35307	0.609771	1.60444	2.61097	-0.0541472	0.00443507	1.43135	0.77821	-0.411327	-0.411327	-0.409086	-0.0025753	-0.718002	1.11933	1.69734	-0.889825	-1.4989	-0.0368102	1.8408	-0.88136	0.406943	-0.193549	-0.0191565	0.00548789
-0.0177288	1.0307	1.02768	0.886186		-0.0177288	-0.345279	0.907157	-0.782638	-2.08837	-0.657735	-0.649027	-0.00427013	-0.0723523	-0.48064	-0.529308	-0.529308	0.50397	-0.000358674	1.03839	0.203004	-0.0254697	0.277772	-0.528606	-0.291989	-0.0108232	-0.205661	0.430952	0.0122306	-1.22367	-0.605722
0.0103	1.02973	1.02754	1.07031		0.0103	-0.439844	1.10416	-2.43477	-3.49939	1.03341	0.377427	-0.00480331	1.82876	-0.940848	-0.147739	-0.147739	-0.280316	-0.000384205	-0.953461	0.379119	0.362465	0.352681	-0.477002	-1.16241	-1.04275	0.891022	0.0109868	0.796022	0.601289	0.627838
0.0614525	1.02474	1.02725	-0.842715		0.0614525	0.36897	-0.820585	-0.116536	0.350731	-2.62249	0.334029	-0.00361259	-1.04324	0.801733	-0.768941	-0.768941	0.0154738	-0.00182119	-1.28941	0.386473	-1.01066	-0.709098	-0.552022	1.62675	0.285979	1.08998	-0.234785	0.848275	0.607862	0.618605
0.10721	1.0252	1.02697	-0.732697		0.10721	-0.895595	-0.706887	-0.411727	-0.668396	-1.0563	0.103967	-0.00162177	-1.63259	-0.0968487	-0.625692	-0.625692	0.655394	-0.00197861	0.227295	-1.62471	-3.65339	-0.359043	-0.589084	0.173114	-0.626072	1.67546	-0.713927	0.871794	-0.582612	0.247957
0.148603	1.0266	1.0267	-0.0521463		0.148603	-0.0638165	-0.0212047	-1.14097	-0.30789	-0.223339	0.0784722	-0.00530831	0.146053	0.881435	-1.4405	-1.4405	0.27653	-0.000180123	0.962091	-1.04779	-0.0176695	-0.0228706	-0.0793213	-0.282159	-0.969173	1.46966	1.34586	0.673239	-1.56711	-0.0326242
0.186391	1.02786	1.02643	0.54664		0.186391	1.35263	0.568139	-0.0996233	-1.44954	0.455353	1.95402	0.00214202	-1.74523	0.297576	-1.08647	-1.08647	0.211913	-0.00129062	1.5241	-0.27398	-1.02839	0.714678	-1.30829	-0.857315	0.940379	1.37376	-0.564656	0.627327	-0.0792522	2.40333
0.221153	1.02535	1.02617	-0.410735		0.221153	0.214594	-0.384105	-0.42184	0.360311	0.633365	0.0791374	-0.00237196	-0.711642	-0.300301	-0.879451	-0.879451	0.357297	-0.000917464	-1.7956	-0.452378	-0.150722	1.31029	-1.29435	-1.94792	1.02169	0.692878	-0.20251	-0.553526	-0.467428	1.85055
0.253338	1.02459	1.02592	-0.658292		0.253338	0.188375	-0.63337	0.154846	-2.02437	1.65388	0.560387	-0.0071072	-0.0525195	-0.496324	-2.33546	-2.33546	-2.00791	-0.000868184	0.446015	-1.69341	1.07956	-1.19412	-0.227104	0.0936604	-2.57707	-0.489218	0.70754	0.146969	-0.834141	-0.987933
0.283301	1.02136	1.02567	-2.4445		0.283301	-1.07948	-2.41755	0.438563	-0.785284	-2.15084	0.0499138	-0.00440567	-1.33802	0.333247	-0.623321	-0.623321	-0.932524	-0.000654827	-0.937737	-0.6162	-1.366	-0.255161	-0.578052	-0.166958	-1.22756	0.886232	-0.77911	-0.379731	-1.29867	-1.97451
0.31133	1.02323	1.02543	-0.989163		0.31133	-0.67204	-0.969003	-1.96982	-0.274295	-0.877642	2.44513	-0.00247104	-0.99493	0.770361	-0.858947	-0.858947	-0.200404	-0.00112651	-0.707585	-0.31123	-1.56322	0.306059	-0.982963	-0.553041	0.258875	-0.0164503	-0.79139	-2.08923	-0.407916	0.112584
0.362482	1.02177	1.02496	-1.7365		0.362482	-3.71538	-1.7148	-0.461617	-1.33521	-2.13659	-0.232556	-0.00114481	-0.66407	-0.518679	0.199922	0.199922	-2.83383	-0.000803639	-0.774417	-0.289582	-1.18482	0.188247	-0.474138	-0.0876582	-0.883083	-0.906123	-0.441454	-1.63501	-2.0856	-1.5865
0.40824	1.02161	1.02451	-3.7026		0.40824	-2.46788	-3.65745	-0.27487	-1.878	-1.41846	1.90672	-0.00262341	-0.339759	-0.955099	-0.495049	-0.495049	-0.486869	-0.000877883	-0.731764	-1.44908	-0.93317	-3.08478	-0.446851	-0.118843	-1.34816	0.0843718	-0.756367	-0.365188	-1.0092	-3.03778
0.449633	1.0227	1.02407	-1.08318		0.449633	-0.180051	-1.05878	-1.32163	-2.35972	-0.122335	0.0841693	-0.00394412	-0.68376	-0.150583	0.0110489	0.0110489	0.189732	-0.00027754	-1.08676	-0.235794	-1.00142	-1.67305	-1.49962	-2.72066	-1.66807	-2.71751	-0.907683	-2.07098	0.198863	-0.932871
0.487421	1.01927	1.02366	-2.93798		0.487421	0.154432	-2.91984	-0.21148	-0.323945	-1.50463	-0.522341	-0.0035529	-0.480031	-1.10941	0.16447	0.16447	-1.28899	0.000230824	0.193138	0.924718	0.399522	-0.589711	-0.526017	1.44311	0.331151	-0.116628	-1.25619	-3.12043	-2.51532	-1.00271
0.522183	1.02229	1.02326	-0.6959		0.522183	-0.521808	-0.679198	0.158158	-0.659155	-2.14169	-1.62495	-0.00344383	0.742327	-0.739528	-1.30754	-1.30754	0.535993	-0.00102197	1.38428	-1.7202	-0.537527	0.761586	-0.37681	0.0789974	-0.0616146	-0.227403	-2.18702	-1.30454	0.774589	-1.67367
0.554368	1.02204	1.02288	-0.541759		0.554368	-1.68423	-0.52883	0.579264	-2.72745	-1.61698	1.44935	0.000319989	-1.48173	-1.67298	0.525353	0.525353	-1.77531	-0.000126815	-0.753121	-0.437335	-0.377801	-1.83729	-1.13807	0.00405064	-1.15622	-0.823285	-0.210917	-1.11589	0.312098	-1.98792
0.584331	1.02309	1.02252	0.186008		0.584331	-0.891975	0.191509	-1.53504	-2.22879	-0.257877	-0.26689	0.000468034	-0.671963	-0.800086	-0.774346	-0.774346	-0.415951	-0.000728742	-0.292753	-1.51992	-0.93029	-0.610772	-0.264655	0.838061	-1.58533	-2.73815	-3.19481	-0.806952	-0.420951	-0.950412
0.61236	1.02187	1.02216	-0.14385		0.61236	0.0681381	-0.137038	-0.0760516	-1.0211	-1.1432	-0.12956	-0.00105247	-0.957272	-0.940116	-1.21519	-1.21519	0.566745	-0.000736071	-0.337645	-1.09285	-1.24602	0.198586	0.0420888	-1.12964	-0.982991	-2.14806	-2.75939	0.00467949	-1.83977	-1.35454
0.663512	1.0198	1.0215	-0.972672		0.663512	-0.895694	-0.967563	0.0846716	-0.652874	-0.391307	-0.399525	0.000616643	-0.0991077	0.183462	0.0406535	0.0406535	-0.430199	0.000882001	0.131531	-0.0318167	-0.0189635	-1.59838	0.180338	-1.63081	-1.6603	-2.40364	-0.941076	-1.49541	-0.00824849	-1.45453
0.70927	1.01773	1.02088	-1.80249		0.70927	0.519297	-1.79996	0.639705	-2.60865	-0.361688	-3.83352	-0.00382332	0.861443	-2.18819	-0.400788	-0.400788	-2.81029	6.87e-05	-1.07347	-0.939868	-1.65362	-2.95367	-0.583133	-0.0993537	-2.0964	-3.61421	-2.24441	-1.50611	-0.997943	-1.13602
0.750663	1.01746	1.0203	-1.86095		0.750663	-2.97163	-1.86061	-0.185848	0.808186	-1.51111	-0.575293	-0.000635406	0.738727	-0.482253	-0.247971	-0.247971	-0.80033	-0.000203799	-0.928218	-1.78501	-1.00789	0.780738	-0.0921874	-0.595195	-1.82235	-0.790191	-2.11988	-0.306607	2.89538	-0.651681
0.788451	1.01588	1.01976	-1.93179		0.788451	-0.137657	-1.93322	-0.424305	0.70794	-0.159643	-0.216277	0.00125089	0.408032	-0.404335	-0.814314	-0.814314	-0.324869	-0.000699981	-0.0234772	-1.23089	-0.0551716	-0.122057	-0.129158	-1.19224	-1.57744	-0.201769	-0.862351	-1.65254	-0.529731	-1.02279
0.823213	1.01864	1.01926	-0.343456		0.823213	-1.22545	-0.3467	0.419394	0.0817508	0.307039	0.309623	0.00149273	1.45803	-0.534597	-0.961428	-0.961428	-0.802507	0.000875689	-0.125494	-1.35845	-0.830748	-1.47159	1.62148	-0.492423	-1.39065	-0.45538	-0.200003	0.602605	1.55211	0.17278
0.855398	1.01785	1.01878	-0.409902		0.855398	-0.0543438	-0.413576	0.398551	1.17841	-0.373878	0.161908	0.000294671	1.40557	1.07867	0.36688	0.36688	-0.0169683	0.000374172	-0.377237	-1.18905	-0.323299	-2.08778	0.0605256	-1.21511	-1.50357	-0.163646	-0.853619	-0.425552	0.222931	-1.04064
0.885361	1.01578	1.01834	-1.4759		0.885361	-0.538816	-1.48204	-0.656153	1.08516	-0.55691	-1.80946	0.00290463	0.42106	1.26795	-0.281363	-0.281363	-0.295808	0.00125992	0.0703828	-1.0153	0.254893	-1.44026	0.957608	-0.128481	-1.23249	-1.39135	-0.217561	0.207177	-1.11051	-0.540682
0.91339	1.0171	1.01792	-0.72495		0.91339	-2.07978	-0.736124	0.769693	1.36028	-0.441172	-1.10259	0.00290325	0.353647	1.083	-0.0597306	-0.0597306	0.292894	0.000301943	-0.376648	-0.290829	-0.0138109	-1.2533	0.148158	-0.960749	-0.565265	-1.63695	-1.64565	0.435805	-1.82719	-0.973566
0.964542	1.01674	1.01715	-0.262378		0.964542	-0.619614	-0.272435	1.6588	0.505417	-0.972306	-1.40066	0.00240869	0.838326	-0.0924351	1.09807	1.09807	0.626381	0.00109422	0.699116	-1.01955	0.461778	-1.44201	0.647429	-0.947115	-0.912015	-1.4458	-0.137242	0.325598	0.660544	-0.190092
1.0103	1.0183	1.01646	1.46703		1.0103	0.556462	1.45246	-0.0861679	2.32154	-1.76011	-1.57961	0.00160578	1.32221	0.59355	1.01323	1.01323	1.29657	0.000628218	0.367658	0.0835751	0.970934	-1.02596	1.94003	-2.6015	-1.49016	-0.683638	-2.65027	-0.0136455	-0.363967	0.0557044
1.05169	1.01689	1.01584	0.721533		1.05169	-0.125162	0.70768	0.584508	1.63113	-0.960534	-1.71155	0.0027307	2.31797	0.489925	0.903726	0.903726	1.61493	0.000974143	0.0397132	-0.269555	0.621588	-3.4432	1.6683	0.724775	-0.305952	-1.04972	-1.40698	-0.701195	0.785137	-1.93571
1.08948	1.01542	1.01528	0.0964272		1.08948	-0.262999	0.0815103	2.13862	0.474326	-1.13335	-0.234102	0.00136925	2.88928	1.76351	0.412548	0.412548	1.36265	0.0011045	1.91151	0.41857	1.14505	0.360034	0.37096	-1.08538	-0.889647	-0.305206	-1.60353	-0.188539	1.54642	-0.464875
1.12424	1.01802	1.01477	1.71356		1.12424	-1.17435	1.70167	1.8947	3.60684	0.294215	-1.44422	0.00245273	1.50972	2.26192	1.0916	1.0916	2.02776	-0.000102955	1.16928	0.979832	1.33824	0.317396	2.05752	0.136234	0.0741107	-0.0221751	-0.142892	0.365758	-0.242644	0.249192
1.15643	1.01627	1.0143	1.20253		1.15643	0.619753	1.18822	1.98554	3.22367	-0.354792	-0.596333	0.00379845	1.1738	2.27476	1.1267	1.1267	1.0514	0.00118003	1.54148	2.49849	1.1809	-1.22164	2.31589	0.319681	-0.0451433	-0.344129	0.604868	0.959757	-0.571116	-0.785421
1.18639	1.01625	1.01388	1.82297		1.18639	0.595257	1.80464	3.64594	3.8426	-1.02248	0.349706	0.00246583	2.11757	2.44449	0.600175	0.600175	1.86783	0.00102124	1.51752	0.997456	0.817845	-0.118577	1.72648	0.777293	0.167178	-0.00551216	-0.097751	-0.357035	-0.273217	0.50387
1.21442	1.01501	1.01348	0.922663		1.21442	0.776478	0.908026	2.85581	2.77232	-0.0441485	0.191303	0.00275832	1.86939	1.50161	1.39233	1.39233	2.00933	0.00106376	0.643545	0.704642	1.2756	0.0844655	2.20039	0.225943	-0.296441	-0.0529179	0.980351	-0.310954	0.047443	-0.112019
1.26557	1.01463	1.01278	1.35589		1.26557	1.21903	1.33784	1.99939	3.05456	-0.151583	-0.696502	0.00229502	2.98997	2.718	1.94984	1.94984	3.09021	0.00132248	1.17466	2.95639	1.68105	0.158738	2.34794	1.2573	-0.967462	-1.6622	0.413537	1.13972	-0.3009	0.199245
1.31133	1.01479	1.01218	1.47168		1.31133	2.50572	1.45786	2.51603	3.54629	-0.326235	1.22669	0.00313348	2.81864	2.94182	1.20234	1.20234	3.22563	0.00121377	1.24352	2.12408	1.79502	-0.399604	3.36028	2.74844	0.797813	-0.697149	0.083399	1.03619	1.00422	-0.79437
1.35272	1.01408	1.01165	1.68158		1.35272	3.28554	1.66486	2.24766	3.13935	0.332438	1.42127	0.00425761	3.05833	2.33315	1.79126	1.79126	2.56567	0.00100437	0.529088	1.67097	1.16799	-0.61876	2.80903	0.965182	0.61608	-1.22578	0.686549	1.27525	0.838839	-0.872982
1.39051	1.01485	1.01119	2.15899		1.39051	2.64542	2.14502	2.78241	4.18068	0.317961	0.114079	0.00299099	2.52572	2.77164	2.3007	2.3007	4.45984	0.00166621	0.878746	2.19757	1.33411	1.82923	2.47436	1.39372	1.59605	0.467286	0.536671	1.08708	0.561423	-0.031212
1.42527	1.01574	1.01078	4.47158		1.42527	2.15379	4.45075	2.97207	4.28085	0.243205	0.531655	0.00312869	3.21902	3.75297	2.35174	2.35174	3.23903	0.000718331	0.975023	3.58998	2.21381	1.70622	2.71406	1.04705	0.227314	1.73789	0.794763	0.954974	1.00172	1.4672
1.45746	1.01564	1.01042	3.16914		1.45746	1.25992	3.15552	2.38425	5.91939	-0.518625	-0.484133	0.00323781	4.30567	1.63141	3.03211	3.03211	5.5834	0.00125917	1.16429	3.22469	1.7477	0.644846	2.72645	2.03329	0.781955	0.86427	2.31957	1.65976	0.784917	2.14986
1.48742	1.01476	1.01009	3.52549		1.48742	2.86067	3.50906	3.00931	3.95401	-0.631354	-0.552282	0.00308619	3.85029	3.18886	2.71795	2.71795	3.17147	0.00161492	1.24114	1.92062	1.58936	-0.153655	3.46484	2.29835	0.941978	0.967527	0.904869	0.997085	0.0945692	2.13639
1.51545	1.0146	1.00979	4.24708		1.51545	2.06144	4.22847	3.49302	4.44826	0.544276	-0.0976752	0.00304593	3.56607	3.68486	2.66623	2.66623	3.09743	0.00144309	1.30128	2.81878	2.02376	0.327868	3.08873	2.04299	0.844929	0.870883	2.26418	1.6296	-0.820542	1.66233
1.5666	1.01395	1.00928	4.48306		1.5666	2.22177	4.46415	4.533	5.44151	1.20401	0.273803	0.00357437	3.11577	5.86023	2.23811	2.23811	4.41422	0.000723263	1.81342	2.81524	3.46616	0.8055	3.61807	2.31036	0.90973	-0.0203586	2.19994	1.68757	0.243856	1.77065
1.61236	1.01314	1.00886	4.02701		1.61236	5.14969	4.00975	3.41583	4.65907	0.585323	-0.051305	0.00264493	3.11573	4.46558	2.61841	2.61841	3.14176	0.000771616	1.57635	2.90956	3.16826	1.01527	4.02781	1.54627	0.639488	1.45552	1.72272	1.44006	-0.0463969	2.2334
1.65375	1.01306	1.00849	4.30925		1.65375	2.49841	4.29315	3.76584	5.88462	-0.116725	1.37299	0.00333746	3.80189	4.57074	2.54073	2.54073	3.43316	0.0011172	1.91472	2.22245	2.83179	1.38653	4.22037	2.07363	1.10034	1.30563	1.35906	2.42133	0.303883	2.17318
1.69154	1.01303	1.00818	4.28105		1.69154	4.2854	4.26703	3.26634	3.9743	1.802	0.722586	0.00340436	4.03562	4.04031	2.23727	2.23727	3.85194	0.000828384	1.08411	3.81714	2.76739	0.687701	4.17057	1.9312	0.668253	1.56206	0.967241	1.57329	3.16755	1.94027
1.7263	1.0126	1.00791	3.73151		1.7263	6.84025	3.71976	3.41061	3.36961	1.95355	1.61511	0.00204411	3.80169	3.74845	1.99407	1.99407	3.56531	0.00120686	1.80574	2.69776	2.70132	1.98532	4.64041	2.99861	1.66965	-0.230758	0.471215	3.4746	1.65203	1.40442
1.75849	1.0128	1.00768	4.39845		1.75849	4.8454	4.38666	3.20994	4.34562	3.2948	0.980101	0.00308212	3.76498	3.1798	2.95531	2.95531	3.23977	0.00114312	1.20743	2.25866	2.49579	1.3299	2.89092	2.11246	2.30758	1.10271	0.736216	2.98211	0.310288	2.90735
1.78845	1.01258	1.00747	3.67287		1.78845	5.00302	3.66369	3.40178	3.71102	2.27185	-1.12638	0.00300906	4.29921	2.71745	2.78923	2.78923	3.40444	0.000717536	1.3095	2.58563	2.10096	1.58823	3.37463	1.51674	2.50273	1.19044	0.625869	2.89686	0.970841	1.90886
1.81648	1.01211	1.00728	4.17627		1.81648	5.45911	4.166	3.47562	3.85615	2.13945	0.96495	0.0029938	4.10639	4.32991	2.36472	2.36472	3.35576	0.00101213	1.31326	3.57313	2.89302	0.889268	4.21625	2.15707	1.63894	1.6285	1.63819	2.98116	1.52907	3.18781
1.86763	1.01153	1.00697	3.48155		1.86763	5.05169	3.4737	4.06158	3.95631	0.537351	0.956804	0.00227389	4.35637	3.207	2.62858	2.62858	3.93069	0.000811388	1.27178	2.53437	3.36823	0.884794	3.63051	2.39574	1.18389	2.48069	2.05396	2.39446	0.867569	4.62848
1.91339	1.01168	1.00671	4.22998		1.91339	4.03162	4.2224	3.14029	3.97425	0.802679	-0.214151	0.00253748	3.81794	4.57758	2.93536	2.93536	3.00747	0.000951272	1.36263	3.24293	2.34335	0.414876	4.00669	1.60121	1.96277	1.11496	1.33724	2.68444	0.751082	3.84051
1.95478	1.01139	1.0065	4.37882		1.95478	2.59829	4.37194	2.89206	3.1311	1.06881	0.875322	0.00255282	3.41844	3.73644	3.10792	3.10792	2.8955	0.000795215	1.01713	2.93237	3.04349	1.33968	3.0943	2.68532	2.28805	1.52571	1.14112	2.5863	0.015378	1.4848
1.99257	1.01069	1.00632	3.90306		1.99257	4.08692	3.89714	3.32879	3.5872	0.606719	0.24839	0.00252386	4.24937	5.62006	2.48402	2.48402	3.25939	0.000606727	1.5738	3.2295	2.84579	0.988369	3.11745	2.1824	2.64254	1.52306	1.12334	2.34212	0.280627	2.69857
2.02733	1.01045	1.00616	3.9108		2.02733	4.05012	3.90562	3.58325	3.42196	0.634659	0.296594	0.00212076	2.89063	3.77763	2.33442	2.33442	2.68977	0.000634724	0.89098	3.04416	2.79596	1.30793	4.3934	3.56374	3.12105	2.28718	1.12918	1.78571	0.807779	2.08754
2.05952	1.01084	1.00603	3.75992		2.05952	2.66817	3.75614	3.59579	3.57203	1.1399	2.15369	0.00134596	2.4121	3.3656	2.40851	2.40851	2.76717	0.000105354	1.43847	3.72755	1.95645	1.97664	2.88146	2.2811	2.73147	2.66076	0.278945	2.94418	-1.34564	3.43987
2.08948	1.01008	1.00591	3.51811		2.08948	4.5169	3.51466	3.03026	3.95356	1.72728	1.47573	0.00189283	2.42539	5.56943	2.45322	2.45322	3.941	0.000220612	1.6139	3.289	1.98764	1.97711	1.77639	1.5636	3.61774	2.08622	-0.0217449	2.74144	-0.0327817	2.84588
2.11751	1.00999	1.00581	3.92914		2.11751	3.85268	3.92594	3.06757	2.61705	1.64924	0.821241	0.00141937	2.56163	4.77153	2.86876	2.86876	2.86186	7.77e-05	1.55116	3.36702	1.70685	2.55823	2.75012	1.72897	3.24464	2.28724	0.820409	2.74172	0.0162677	2.0355
2.16866	1.00957	1.00564	3.72363		2.16866	3.26052	3.72152	3.42133	2.02742	0.956256	0.515914	0.00175475	2.64137	4.56572	2.53261	2.53261	2.59636	0.000234925	1.51385	2.86965	1.60749	1.4154	2.0357	1.58465	2.28302	3.55608	1.55477	1.44423	-0.548832	2.6867
2.21442	1.0088	1.0055	3.02622		2.21442	4.52596	3.02507	3.2747	1.95609	0.735444	1.40977	0.00152771	2.53944	4.49311	2.71972	2.71972	2.9276	0.000198509	1.66916	3.24493	0.973439	1.32849	1.71532	1.3949	2.47205	4.12478	1.10531	2.13496	-0.373557	1.38813
2.25581	1.00931	1.00539	3.73642		2.25581	3.3967	3.73602	2.23135	1.43047	0.906039	0.705071	0.00105955	2.59228	6.02822	1.83464	1.83464	2.27927	-8.58e-05	1.30348	3.80333	1.31721	0.437279	1.97038	2.41919	1.26706	3.18311	1.45899	2.18573	-1.45317	2.68355
2.2936	1.0082	1.0053	2.74263		2.2936	4.12599	2.7429	2.23818	1.38948	1.63481	2.0906	0.000587896	2.60001	3.40131	1.72889	1.72889	3.04562	-0.00010395	1.10649	3.58744	1.32105	1.76808	2.27357	1.50362	1.40629	2.18623	1.84662	2.70827	-1.67474	2.22168
2.32836	1.00813	1.00522	3.3906		2.32836	6.45644	3.39166	2.71847	0.854558	0.334319	0.388175	0.0005473	2.81922	2.67525	1.9374	1.9374	2.35754	0.000297718	1.34114	3.21235	1.3513	0.512181	1.33041	1.48033	1.33692	1.35114	2.35404	2.24356	1.19711	2.23734
2.36055	1.0078	1.00515	3.06105		2.36055	2.40664	3.06271	1.80263	0.847398	0.991542	0.794878	0.000546736	2.59465	3.57232	2.05923	2.05923	1.88106	-0.000169648	1.77042	2.49299	1.47423	-0.180231	1.80359	0.915166	1.22001	0.688775	1.58116	1.17786	0.511296	3.34732
2.39051	1.00747	1.0051	2.28234		2.39051	2.01339	2.28418	1.00564	0.836164	0.633283	0.562975	0.00109964	2.45514	2.66752	1.3355	1.3355	1.97716	-0.000302234	1.52402	1.80896	2.29151	0.605511	1.37803	1.41011	1.01176	1.03754	1.4593	0.998167	0.77557	1.91947
2.41854	1.00733	1.00505	2.46527		2.41854	1.80679	2.46778	1.45454	0.745399	1.74691	0.613248	0.00072609	2.69528	2.46534	1.52782	1.52782	1.38602	-0.000149024	1.61892	1.27251	2.38164	0.0942151	1.35303	1.40804	1.66064	1.44921	1.20928	1.05651	-0.198376	1.20194
2.46969	1.00707	1.00496	2.41027		2.46969	0.133562	2.41374	1.57002	0.779514	0.883282	0.332353	-0.000301191	2.66372	0.453593	1.35418	1.35418	1.31603	-0.000110098	1.15313	1.33476	2.27186	-0.329255	1.14949	1.68367	0.900303	0.0271027	0.611648	1.48507	0.389087	0.185851
2.51545	1.00689	1.0049	2.3934		2.51545	-0.800782	2.39773	0.683699	0.23362	0.332839	0.314689	-0.00103874	2.29853	0.44603	1.19607	1.19607	1.37439	5.42e-05	1.21794	1.22487	2.18159	0.123877	1.286	0.667468	0.262982	0.69554	0.2778	0.450849	1.83232	1.48025
2.55684	1.00661	1.00484	1.99611		2.55684	-1.91966	2.00071	0.668444	0.016851	0.536425	0.424708	-0.000962616	2.41499	-0.250798	1.26329	1.26329	1.03112	-0.0003284	0.968812	1.8515	1.50164	0.987262	1.6954	-0.0898354	0.42002	0.929623	0.633728	0.723023	-0.0294697	0.752479
2.59463	1.00602	1.0048	1.59017		2.59463	-1.34375	1.596	0.534814	0.136765	0.452922	1.42225	-0.000368722	2.26343	0.0827974	1.24902	1.24902	0.90494	-0.000519846	0.3525	0.791897	0.985754	-0.119972	1.17705	0.0328196	0.503816	0.987431	1.03559	1.06059	-1.20047	-0.0993282
2.62939	1.00597	1.00476	1.96134		2.62939	-1.08493	1.96921	0.0752577	0.164281	-0.312468	1.99795	0.000212827	1.87209	-0.595911	0.998837	0.998837	0.816638	-0.000616068	0.0402894	1.48872	0.904634	1.51977	0.202239	-0.74463	0.208206	1.77525	-0.0411723	0.577418	-0.0117638	-0.0895294
2.66158	1.00531	1.00473	0.797987		2.66158	-2.09202	0.805034	-0.408861	0.402129	0.98893	1.77663	-0.000225103	1.71036	-0.412004	1.0486	1.0486	-0.434503	-0.000473682	0.231025	1.75175	0.646249	-0.255372	-0.998558	-0.651232	-0.221086	0.718885	0.292656	0.335884	0.260652	-0.462111
2.69154	1.00537	1.00471	0.905112		2.69154	-1.47789	0.912408	-0.163459	-0.0351556	-0.208119	1.17554	-0.00104467	2.39298	-0.781084	0.67008	0.67008	-1.69588	-0.000320847	0.742693	1.11652	0.736413	-0.014941	-1.85977	-1.23808	0.920979	0.102885	1.62778	-0.883365	-1.91512	-0.496373
2.71957	1.00545	1.00469	1.00719		2.71957	-1.70387	1.01455	-0.0980881	-0.278091	-0.255447	1.39194	-0.00158736	2.28996	-0.662721	0.167297	0.167297	0.0384758	-0.000364578	0.379797	0.931093	0.0660187	-0.327863	-1.36887	-0.836844	0.539804	0.483949	1.55862	-0.569202	-0.170267	0.112261
2.77072	1.00451	1.00465	-0.205024		2.77072	-0.961447	-0.196433	0.113432	-0.825798	0.59461	0.673158	-0.00180329	1.94419	-1.20967	0.695177	0.695177	-0.587654	-0.000571118	-0.0173197	-0.230574	0.74315	-0.444632	-1.468	-0.859547	-0.482849	0.374331	0.698114	-1.02495	-0.33464	0.31454
2.81648	1.00414	1.00462	-0.57097		2.81648	-0.598419	-0.563601	-0.218588	-0.600203	-0.815438	1.27733	-0.00192362	1.07818	-1.22795	0.234533	0.234533	-1.10682	-0.00078761	-0.153463	-0.879194	-0.257678	-0.579903	-1.07093	-0.589103	-0.940949	-0.151592	0.678752	-1.68558	-0.0885513	0.194464
2.85787	1.00401	1.0046	-0.735578		2.85787	-0.510283	-0.727489	-1.13454	-1.03397	-0.163667	0.838567	-0.00144404	1.27997	-1.51546	0.0247944	0.0247944	-0.919373	-0.000791185	-0.589692	0.0821027	-0.828663	0.187995	-1.12287	-0.720506	0.403695	1.02229	0.887223	-1.28769	-0.588121	-0.526244
2.89566	1.00397	1.00458	-1.012		2.89566	-0.217831	-1.00085	-1.25666	-1.31143	-0.291212	0.978755	-0.00240567	1.12553	-1.0232	-0.514735	-0.514735	-1.34881	-0.000404577	-2.74337	-0.076589	-1.24791	1.15839	-1.07067	-0.861049	0.504715	-2.01519	1.68028	-1.14623	-0.589403	-2.6932
2.93042	1.00341	1.00456	-1.87731		2.93042	-0.628198	-1.86619	-0.793197	-1.49037	0.320501	0.911788	-0.00235478	-0.219894	-0.670696	-0.210476	-0.210476	-1.772	-0.000505645	-1.30737	0.155526	-0.99663	-1.62295	-1.9518	-2.02004	-0.672636	-0.610848	0.0922099	-0.75977	-0.635242	-3.97899
2.96261	1.00385	1.00455	-1.58241		2.96261	-1.37585	-1.56671	-1.48423	-2.35873	-0.750208	0.579734	-0.00155989	-1.0387	-0.734721	-0.388375	-0.388375	-1.51167	-0.000639241	-1.28897	-0.382248	-1.78515	-1.12811	-2.00376	-1.76622	-1.14313	-0.0721814	-0.139674	-1.32758	-1.15501	-2.3255
2.99257	1.00375	1.00454	-1.52666		2.99257	-1.83146	-1.51298	-1.83325	-2.56897	1.19418	1.09341	-0.0017118	-1.66863	-0.670696	-0.453089	-0.453089	-1.97123	-0.00075025	-0.899474	-1.33528	-2.40089	-1.58253	-2.60918	-1.92263	-0.292766	-0.928542	-1.0456	-1.09552	-0.882402	-2.34598
3.0206	1.00354	1.00453	-2.44643		3.0206	-1.65418	-2.42863	-1.69732	-3.55168	-0.0791698	-0.109531	-0.00247587	-1.42772	-1.13076	-0.322744	-0.322744	-1.4126	-0.000604142	-0.469183	-1.45841	-2.26376	-1.64154	-2.27719	-1.13102	0.168828	-1.94769	-0.656432	-2.48272	-0.296706	-1.15522
3.07175	1.00319	1.00452	-2.40465		3.07175	-1.27635	-2.3913	-1.77465	-3.53089	-0.895452	0.62192	-0.00275393	-0.387614	-1.93696	-0.675834	-0.675834	-1.50584	-0.000710013	-0.713518	-1.14299	-2.72519	-1.61693	-2.01274	-1.34002	0.655431	-2.45305	-0.139745	-1.69625	-0.65068	-1.06886
3.11751	1.00327	1.00451	-2.45562		3.11751	-1.26648	-2.44076	-2.89528	-3.63298	-0.905239	-0.62144	-0.00295391	0.687584	-2.72133	-1.14538	-1.14538	-1.74401	-0.000510997	-0.591891	-2.23941	-0.976335	-1.15124	-1.70665	-2.20508	0.873017	-2.29343	-1.02918	-1.75594	-0.720196	-0.998553
3.1589	1.00272	1.0045	-3.29472		3.1589	-2.19424	-3.28062	-3.76173	-4.25194	-0.554469	-2.04426	-0.002462	0.54595	-2.1421	-1.41692	-1.41692	-2.71329	-0.000284982	-0.770488	-1.96415	-1.5594	-2.07846	-3.09593	-1.14559	-0.148874	-2.6589	-0.436381	-1.42805	-0.569181	-1.79279
3.19669	1.00217	1.00449	-3.38063		3.19669	-2.50207	-3.36946	-4.55566	-5.08667	-0.972465	-1.89222	-0.00233819	0.13059	-2.57944	-1.57038	-1.57038	-1.61123	-0.000734025	-0.958014	-2.08347	-1.23939	-1.06505	-4.20073	-1.64932	-0.743412	-2.54649	-1.11185	-1.24297	-0.0245196	-1.68187
3.23145	1.00201	1.00448	-6.11181		3.23145	-3.43673	-6.0927	-4.56926	-5.52183	-1.39902	-1.33044	-0.00320313	0.535877	-3.3185	-1.58208	-1.58208	-0.631347	-0.000993227	-0.693682	-1.34216	-1.24665	-2.10893	-3.34956	-1.619	-1.19273	-1.96146	-0.630051	-2.36909	-0.193804	-1.28364
3.26364	1.00178	1.00448	-4.33657		3.26364	-2.12883	-4.32406	-5.61546	-4.22727	-1.07333	-1.5633	-0.00299071	0.996641	-4.827	-2.72115	-2.72115	-0.627962	-0.000888513	-1.31023	-2.65343	-0.280244	-2.19628	-3.89566	-1.72997	-1.10549	-2.54516	-1.05605	-2.13989	-1.00749	-1.71675
3.2936	1.00257	1.00447	-3.13553		3.2936	-1.91403	-3.1226	-4.1439	-5.63105	-3.21451	-2.44803	-0.00335931	0.193308	-3.18821	-3.22213	-3.22213	-0.283464	-0.00072749	-1.27645	-5.03611	-1.93834	-1.46105	-3.87123	-3.06319	-1.35055	-2.31586	-1.08597	-2.34874	-0.739667	-1.02935
3.32163	1.00255	1.00447	-2.19955		3.32163	-2.97739	-2.1905	-2.25662	-4.11808	-0.893859	-1.61451	-0.0032424	-1.24729	-3.00213	-2.9816	-2.9816	-1.16796	-0.0004017	-1.95959	-6.22214	-2.46471	-1.28976	-2.51575	-2.05531	-2.77517	-0.607349	-0.338829	-0.595757	-0.180455	-1.08957
3.37278	1.00251	1.00446	-1.88752		3.37278	-3.51838	-1.87984	-1.77764	-2.89065	-0.626858	-1.12911	-0.00386164	-3.52768	-4.93406	-2.52834	-2.52834	-3.44118	-0.000549223	-1.4992	-3.18824	-2.40451	-1.85547	-2.27872	-1.89172	-3.49658	-1.40819	0.463215	-1.51547	-0.508667	-2.63076
3.41854	1.00253	1.00446	-1.73499		3.41854	-3.00051	-1.7278	-2.162	-2.82813	-1.2717	-1.60412	-0.00426228	-4.23847	-4.14013	-2.58634	-2.58634	-2.85398	-0.000762713	-1.08952	-2.85715	-2.1159	-2.25398	-1.76594	-2.97485	-4.23706	-1.30375	-0.896426	-0.98305	-0.406903	-2.42074
3.45993	1.00291	1.00446	-1.09179		3.45993	-5.78083	-1.08611	-1.91216	-3.9218	-2.21396	-2.37904	-0.00389229	-4.00774	-3.28085	-2.73468	-2.73468	-1.88178	-0.000462934	-2.41146	-2.09836	-3.12071	-1.40829	-1.56589	-2.59845	-1.70723	-1.87726	-0.0441769	-1.41232	-0.218766	-3.39285
3.49772	1.00285	1.00445	-1.18534		3.49772	-10.7659	-1.17938	-2.77407	-3.07814	-1.6324	-1.35952	-0.00331768	-3.54964	-3.38996	-3.38791	-3.38791	-1.99709	-0.000948066	-2.2073	-1.77082	-4.04493	-1.33478	-1.61805	-2.06906	-0.232086	-1.66372	-3.61481	-1.10904	-0.222799	-2.967
3.53248	1.0027	1.00445	-1.1803		3.53248	-4.27523	-1.17483	-2.54699	-4.17912	-1.51914	-1.2268	-0.00308582	-5.10873	-3.51064	-3.66968	-3.66968	-5.61213	-0.00104935	-1.29053	-1.4399	-3.58191	-0.442658	-3.7767	-1.97465	-0.286028	-1.44829	-3.02539	-1.06895	-0.42726	-1.73914
3.56467	1.00177	1.00445	-1.89391		3.56467	-3.43345	-1.88818	-3.40528	-3.82987	-1.11632	-0.876137	-0.0014277	-5.52549	-3.96319	-5.01038	-5.01038	-3.9458	-0.00131695	-0.301963	-1.62298	-3.32917	-0.56008	-2.53811	-3.30949	0.0919082	-2.1379	-3.15633	-1.17221	-0.451473	-2.33197
3.59463	1.00158	1.00445	-2.62536		3.59463	-2.95631	-2.61791	-3.47244	-3.21646	-1.61803	-1.50079	-0.00129057	-4.0251	-4.03407	-5.41432	-5.41432	-3.22363	-0.0011162	-0.175067	-4.21977	-2.92426	-1.00202	-3.18244	-2.93839	-0.85857	-1.40785	-3.34182	-1.84727	-0.198522	-1.80612
3.62266	1.00161	1.00445	-2.31217		3.62266	-1.80022	-2.30553	-1.57715	-4.43478	-1.95633	-0.186526	-0.00246954	-4.26348	-1.09614	-2.58016	-2.58016	-0.96676	-0.00125471	-0.549579	-1.09033	-0.633299	-0.401914	-1.52766	-0.872636	-1.95236	-1.73935	-0.633789	-2.61765	0.150211	-4.315
3.67381	1.00252	1.00445	-2.83007		3.67381	-2.92971	-2.81805	-1.09163	-3.13432	-1.17239	-0.133077	-0.00210588	-5.52586	-2.68217	-1.93003	-1.93003	-1.24055	-0.0013679	-1.23905	-1.06079	-1.39352	-0.6541	-0.931746	-1.09495	-0.220856	-0.744133	-0.263055	-2.27328	-0.199298	-5.03499

## Sheet: Figure 4G
Example Curve (Measurement 10 Experiment SdM079C)					Residuals with 2-diffusion compoent model (inset panel) for all measurements of Experiment SdM079C)
Time (log10(ms))	G(t) Raw FCS curve	G(t) 2-diffusion component Model Fit	Residuals		Time (log10(ms))	04 B10 BSA c1 cyto	05 B10 BSA c1 nucleus	06 B10 BSA c2 cyto	07 B10 BSA c2 nucleus	08 B10 BSA c3 cyto	09 B10 BSA c3 nucleus	10 B10 BSA c4 cyto	11 B10 BSA c4 nucleus	12 B10 BSA c5 cyto	13 B10 BSA c5 nucleus	14 B10 BSA c6 cyto	15 B10 BSA c6 nucleus	16 B10 WNT3A c1 cyto	17 B10 WNT3A c1 nucleus	18 B10 WNT3A c2 cyto	19 B10 WNT3A c3 cyto	20 B10 WNT3A c3 nucleus	21 B10 WNT3A c4 cyto	22 B10 WNT3A c4 nucleus	23 B10 WNT3A c5 cyto	24 B10 WNT3A c5 nucleus	25 B10 WNT3A c6 cyto	26 B10 WNT3A c6 nucleus	27 B10 BSA c7 cyto	28 B10 BSA c7 nucleus
-2.52288	1.21381	1.1879	0.543229		-2.52288	1.00037	0.466949	-0.689956	-0.12246	0.564328	1.84017	-0.0299917	0.0107567	-1.14443	0.15007	0.158554	0.204399	-0.00364488	2.7005	-0.627299	0.816009	1.15218	-0.313346	-0.853317	0.165403	0.0139412	1.88623	-0.293148	-1.09241	-0.674907
-2.45593	1.10113	1.17015	-1.76286		-2.45593	0.266257	-1.82114	-0.0763775	0.57781	0.0616355	-0.988492	0.0310881	1.63172	0.0113224	-0.785993	-0.80045	-0.566985	-0.022542	-0.821942	0.861736	-0.591702	-1.88071	-0.609013	-0.388739	1.12707	0.838625	0.378134	0.518942	-0.236014	1.72732
-2.39794	1.20401	1.1545	1.66961		-2.39794	-0.497448	1.62843	0.533201	1.25859	-0.692992	0.85886	-0.00730133	-0.0432943	1.0837	0.443662	0.427173	0.880075	0.0127322	-2.20886	0.656576	-0.333024	0.35459	-0.380138	-1.51584	0.186418	-0.191765	0.711913	0.530925	0.74906	0.0735398
-2.34679	1.15747	1.14071	0.357957		-2.34679	-2.00067	0.349291	0.0656003	0.559039	-0.226157	-0.90256	0.000204952	-1.86686	0.616311	0.154952	0.147111	-1.06417	-0.00189005	-0.489566	0.453106	0.205891	-0.467392	2.42841	2.40651	-0.241322	-1.30736	0.0283072	-1.69422	0.646304	-3.36253
-2.30103	1.08398	1.12855	-1.21527		-2.30103	-0.19242	-1.20958	-0.0503891	-1.35895	1.7973	-1.8357	0.00898633	0.483333	-0.742884	0.70591	0.701755	0.814678	0.00689978	-2.15262	-1.02459	-0.44445	-0.902898	0.112781	0.4417	-1.46778	-1.13415	-0.272595	1.28726	-0.101582	2.021
-2.25964	1.0901	1.11783	-0.680917		-2.25964	-1.19572	-0.664713	0.203362	-1.82912	-1.74815	-1.22123	0.0132057	-0.0894089	-1.31841	-1.75439	-1.75356	-0.457208	-0.0060416	-0.885455	-1.79126	-0.328675	-1.31459	-0.218637	-0.0790892	-1.27438	0.694178	-1.50056	-0.270604	-0.319596	-1.40624
-2.22185	1.12685	1.10838	0.627942		-2.22185	-0.0965211	0.661182	-0.283489	0.0217902	-0.705721	-0.387216	-0.0160857	-2.19459	-0.43411	0.617452	0.620433	0.138209	0.0200935	-0.95923	-1.68989	1.55272	2.8471	0.764722	0.788151	-0.856958	-0.157975	0.281472	-0.944285	1.70848	0.1846
-2.18709	1.07418	1.10005	-0.615226		-2.18709	0.715801	-0.58697	-0.600155	-1.88626	0.906908	1.68557	0.0227838	0.215026	0.552142	1.68557	1.6922	-0.536235	-0.000560219	-0.553344	0.760519	0.24606	-0.0256105	0.455583	1.02338	0.811324	-0.0867032	-1.35076	-0.826313	0.359289	1.06733
-2.1549	1.11338	1.09271	0.530891		-2.1549	0.618507	0.564618	1.78716	-0.591829	0.107727	0.0406475	-0.0515742	-0.473447	-0.679247	1.45957	1.46767	-0.570418	0.0263618	-0.35942	0.685779	0.472522	0.279599	-0.250839	0.954631	1.60196	-0.814251	-0.104353	1.20522	-0.114057	0.499751
-2.12494	1.09623	1.08624	0.325545		-2.12494	-2.29598	0.370168	-0.346966	0.161623	-0.553377	-0.877357	0.0554814	0.068447	0.100471	0.824294	0.83342	0.705847	-0.00637356	3.60363	0.968778	-0.191998	-0.856701	1.17657	-1.6309	-0.0201881	0.23525	-0.684972	-0.338204	-1.35087	0.744082
-2.09691	1.06867	1.08053	-0.413979		-2.09691	-0.638716	-0.366027	0.047892	1.19104	-1.91233	-0.0780413	0.0372089	-0.770979	-1.18193	0.575646	0.590057	-1.93248	-0.00698509	0.14784	2.05608	0.144651	-0.781063	-2.42029	0.23028	0.243008	-0.0566718	-0.123721	-0.544788	-0.330777	0.314924
-2.04576	1.09439	1.07106	0.762854		-2.04576	2.43315	0.804304	1.4324	2.17746	0.718692	0.316677	-0.00730024	0.824502	0.190594	0.638269	0.653017	-0.195038	0.000946767	-0.144696	-0.298378	-0.706767	-1.56862	0.331333	-0.516172	0.327463	-0.831593	-0.770522	1.41933	0.632378	-0.163451
-2	1.065	1.0637	0.0603148		-2	-1.44357	0.110054	0.0224081	-0.830597	1.50511	1.97965	-0.0355934	-0.945448	0.725236	2.50788	2.52872	0.404176	-0.00721224	0.638461	-2.58703	-0.00205054	1.57715	-0.797613	-0.0654785	-1.42302	0.221813	-1.31786	-1.61223	-0.440747	0.59518
-1.95861	1.04417	1.05798	-0.491809		-1.95861	-0.500338	-0.462407	-0.96099	0.0226252	0.501981	-0.652709	-0.0279374	1.53784	1.43453	1.43979	1.4579	1.05959	-0.00858747	1.25703	-0.542843	-0.922528	-0.776239	0.0705813	-1.74431	0.734359	0.888723	1.23581	1.42697	-0.693409	0.28554
-1.92082	1.0454	1.05353	-0.37463		-1.92082	3.32689	-0.348458	-2.71166	0.0117215	1.52256	-0.950735	0.00737246	1.81549	1.23372	0.190413	0.21667	0.256572	-0.0131404	0.108501	0.750369	0.413422	0.981452	1.13799	-0.310876	-0.0304943	0.187275	-0.0957068	0.308499	-1.65707	-0.116095
-1.88606	1.06867	1.05007	0.661983		-1.88606	1.26239	0.673229	-0.763429	0.578903	-0.889144	-1.27745	-0.0230041	0.714106	-1.80167	1.19587	1.22581	1.93813	0.0146721	-0.295678	0.611671	-0.6328	-0.0977212	3.00795	-1.54411	-1.98093	1.59806	0.500454	2.53296	0.961066	-0.33852
-1.85387	1.03192	1.04737	-0.62777		-1.85387	1.90523	-0.624485	1.02801	-0.985658	0.185854	-1.56411	-0.0203361	1.94876	0.939473	0.846278	0.872619	0.724364	0.00856353	0.781375	1.54794	0.677098	0.0230326	0.797915	-0.00299449	0.476006	-0.615731	0.063046	0.363534	0.66229	1.05919
-1.82391	1.03927	1.04528	-0.319902		-1.82391	-0.486985	-0.326944	0.439054	1.01951	1.06723	-1.39533	-0.000605359	-1.52716	-1.71512	0.629093	0.654973	-0.261855	0.00273218	-0.25053	-0.117368	-0.704266	-0.260116	-0.515509	0.494433	-1.40673	-0.131424	0.297963	-1.06611	-0.0243744	1.91959
-1.79588	1.04724	1.04364	0.141028		-1.79588	0.75682	0.128446	1.42221	3.00823	0.0106609	-0.878972	-0.00164621	0.752851	0.500552	1.43438	1.45852	0.428698	-0.0109988	-0.940951	-0.520994	-0.511278	0.0578056	-0.878139	-0.404585	1.11064	0.956386	1.19243	1.36826	-0.396085	2.28174
-1.74473	1.02856	1.04138	-1.08489		-1.74473	0.424339	-1.13776	-0.000384007	3.24942	-0.0435673	0.361568	0.00375026	3.57618	-0.0507259	0.87722	0.900929	0.1615	-0.00301738	-0.641709	0.614885	-0.802602	0.270096	-1.16961	1.96196	-0.700501	-0.52776	-0.826199	-0.152599	0.692891	0.261174
-1.69897	1.0454	1.04	0.224723		-1.69897	-0.486877	0.189599	-0.23556	-2.54914	1.08493	2.0762	0.00928583	1.79062	1.05975	-0.398352	-0.36083	-1.96077	0.00137187	-1.47614	-0.648773	-0.252403	1.45633	0.3541	-0.587404	0.604249	-1.49414	0.0815027	0.105191	0.771229	0.22143
-1.65758	1.04877	1.03915	0.565004		-1.65758	1.74771	0.506439	1.61144	0.319726	-1.96274	0.473155	0.00598934	-0.525595	-1.79365	3.21363	3.25006	1.71968	-0.0102573	1.2328	-0.950184	3.47185	1.77463	0.382482	0.301598	1.64003	0.792155	-1.79789	0.154355	0.134516	0.933733
-1.61979	1.0751	1.03863	1.88745		-1.61979	0.16688	1.83053	-0.257082	0.449323	0.199795	0.595721	0.00283956	0.964933	-0.360222	0.900716	0.923982	0.722233	-0.0110538	-0.864473	0.524129	1.75736	0.447105	0.740023	0.70318	-0.277974	0.659533	-1.18914	0.201769	0.996542	1.9635
-1.58503	1.10633	1.03829	3.47172		-1.58503	-0.206553	3.41211	0.790254	-2.54424	-0.400255	2.13261	-0.0235019	3.06922	-1.12154	0.864395	0.889175	-0.149471	-0.00723646	-0.43555	-0.889846	0.487317	2.64882	0.276737	-0.0778542	-0.845078	0.822351	2.81453	-0.0960907	1.92775	0.170173
-1.55284	1.03101	1.03808	-0.578587		-1.55284	1.37378	-0.677724	-0.172838	0.419546	-0.191685	-1.63495	-0.00371284	2.0182	1.6108	-0.57238	-0.552664	0.58826	-9.26891e-05	1.42295	1.25165	-1.41159	1.34251	-0.454937	0.803574	1.79343	0.300612	-0.58901	-0.712036	-2.58777	-0.230489
-1.52288	1.0503	1.03794	0.74221		-1.52288	-1.15021	0.667728	0.315395	-1.9302	0.887801	-0.410775	-0.012041	1.11353	-0.0424783	0.854556	0.873505	1.49293	0.0181095	-2.76901	-0.194217	0.68931	-0.140749	1.06869	-0.934926	-1.29193	-1.55117	0.0553673	0.11622	1.11013	0.670677
-1.49485	1.05428	1.03784	1.81248		-1.49485	-1.75145	1.6739	1.0325	-1.357	-0.748357	0.926268	0.00809711	0.082635	0.548542	1.28736	1.33894	0.7466	0.00194181	-0.432531	0.990616	-0.0022343	0.513196	-0.417574	-1.57509	-0.138442	-0.0060484	1.47784	1.11779	1.37895	0.617122
-1.4437	1.03162	1.03771	-0.438119		-1.4437	-0.39426	-0.529514	-0.121947	0.919829	-0.15659	-0.125565	0.0182185	1.10564	-0.130688	-0.367591	-0.332551	0.498345	-0.00967602	-1.03832	-0.0756554	0.805105	0.890546	0.146769	-0.636266	0.733325	0.41955	0.825508	0.627524	1.61455	1.61545
-1.39794	1.04938	1.03762	0.827674		-1.39794	-0.316024	0.738108	-0.253885	-1.0576	0.871035	-0.705165	0.00333033	-0.35823	-0.598822	2.75596	2.81237	2.11848	-0.00461355	-0.340837	0.406355	-0.272707	0.0616882	-1.50187	-1.05485	-0.506295	-0.0443628	-0.126688	3.55072	-0.323627	-0.409784
-1.35655	1.04815	1.03755	0.787783		-1.35655	-2.19303	0.693577	0.367592	-1.15791	-0.67678	1.18403	0.0115006	0.607265	1.13288	-0.253491	-0.231093	0.0519394	-0.000491687	-1.36814	0.0732616	1.54577	0.111312	-0.376983	1.47122	0.125754	-0.248013	1.4306	-0.795934	0.39452	1.50162
-1.31876	1.0333	1.03748	-0.270373		-1.31876	1.54998	-0.352145	0.053115	-0.650819	0.399179	0.481541	0.00174543	-0.587043	-1.21948	1.38011	1.41719	0.0242067	0.00261068	-0.244097	0.0643332	1.07012	-0.8635	0.679225	-0.546179	0.598391	-0.101488	0.377964	0.946368	-2.75083	-2.28376
-1.284	1.04417	1.03741	0.533427		-1.284	-2.5954	0.434374	-0.253036	0.890469	0.394272	1.879	0.00747918	1.20075	-0.254828	-0.263523	-0.227611	-0.151994	0.00676341	-1.46904	0.0479184	0.0310646	1.54504	0.732398	-0.692115	-0.318796	-1.50731	-0.858425	-0.442197	0.0451375	0.919723
-1.25181	1.03162	1.03734	-0.397674		-1.25181	-0.727627	-0.484396	-1.03053	0.0545319	0.303855	0.741991	0.0305433	0.71495	2.86985	0.430035	0.457762	-0.544611	-0.00159837	0.0707892	0.604701	1.18178	-1.06668	-0.667409	1.3547	-0.0522692	-1.19698	-1.76442	-0.218791	1.861	-0.113373
-1.22185	1.0281	1.03728	-0.836746		-1.22185	-1.12885	-0.949885	-0.579416	-1.72994	0.49333	1.5947	0.00405404	-0.126871	1.69119	-0.0951174	-0.04808	0.213813	0.0108091	0.897855	0.472096	1.0459	-0.984344	1.00611	-1.50404	1.88417	-1.24129	0.100082	-0.234406	0.956419	-0.639312
-1.19382	1.03192	1.03721	-0.619137		-1.19382	-0.108528	-0.763605	3.20577	-1.93665	1.13568	1.15433	0.00610048	0.426095	-0.0462532	2.37374	2.4391	-0.347061	0.00560958	0.282086	-0.113214	-1.64251	1.07223	0.668503	0.00250519	2.051	0.100976	0.0637823	0.196336	1.74559	0.571471
-1.14267	1.03361	1.03709	-0.271059		-1.14267	0.21917	-0.366149	-0.654192	1.1505	-1.2028	-0.101725	0.0259426	-1.05943	-0.804877	0.118827	0.169605	-0.129006	0.00345756	0.746374	-1.03549	-1.47681	-1.21176	0.704046	1.14174	1.84025	-0.439477	-0.732427	0.112172	-1.83806	1.57697
-1.09691	1.049	1.03696	1.35429		-1.09691	1.677	1.21856	-0.39974	1.48929	-0.244751	0.541098	0.00614775	0.402337	-0.350227	-0.248922	-0.196063	-0.117236	0.00316705	0.0371289	-0.939249	-1.55777	-0.34868	1.07438	1.61705	0.791617	1.33365	-0.184837	1.59198	-0.526292	-1.31212
-1.05552	1.0359	1.03684	-0.10969		-1.05552	0.160929	-0.250235	-0.330056	-0.735689	-0.167712	-1.44167	-0.0118561	-1.74577	-0.307788	-0.620686	-0.592002	0.849243	-0.00105475	-1.68388	1.1317	2.08009	0.939603	-1.19033	-1.58322	-1.36798	-2.03182	0.589776	-0.367284	-1.20456	-0.692505
-1.01773	1.03721	1.03671	0.0651305		-1.01773	-1.93088	-0.0901663	-2.05733	0.95949	-1.10667	0.456589	-0.00243455	1.33826	-2.32563	0.586609	0.634301	-0.868491	-0.00162163	0.907766	-0.491074	-1.25271	-0.482021	0.653867	-0.595294	-1.90089	-0.0105294	-0.499679	-0.664639	0.0125908	-0.432539
-0.982967	1.03751	1.03659	0.0905265		-0.982967	0.84621	-0.0237956	-0.438486	0.988664	-1.87392	-0.16515	0.00105912	1.78954	1.05312	-2.32751	-2.28365	0.0480448	0.00254584	0.260467	0.122195	-0.596483	0.578233	0.54695	0.02492	-0.160601	0.693817	-0.992095	-1.01644	0.203031	0.497418
-0.950782	1.0294	1.03647	-0.8772		-0.950782	0.688904	-1.02006	0.675797	0.576293	3.10281	0.206708	0.00161689	-0.435963	0.75027	0.272092	0.307288	0.237784	-0.00856724	0.826045	0.111618	0.848051	-1.25225	0.271622	-1.05076	-2.76086	-0.244486	1.16974	2.62605	-1.1844	-2.63715
-0.920819	1.04547	1.03635	1.13351		-0.920819	-0.705543	0.99209	-0.615399	-0.37747	1.16508	1.4617	0.0050182	0.0967105	-0.295856	1.62827	1.68693	0.986698	-0.000794244	-1.61047	0.668463	0.126437	-1.63651	-0.46836	-2.82439	-0.212238	-1.73052	-1.15959	-1.70628	3.51352	0.494475
-0.89279	1.03261	1.03623	-0.574131		-0.89279	-2.11701	-0.752643	1.01455	-1.10394	-0.293785	0.341974	-0.00864808	-1.34779	0.207834	1.5773	1.62874	2.07107	-0.00388623	-0.112135	-0.691131	-0.223211	-0.170122	-0.0990214	-1.52966	-1.7065	0.622981	-0.506864	0.658489	0.569688	0.186468
-0.841638	1.02737	1.036	-1.65623		-0.841638	1.50905	-1.86722	-0.227066	-0.77057	-2.27836	1.65578	-0.0119327	0.804533	-0.453384	0.764507	0.816533	0.947028	0.000710164	0.140337	1.17741	0.83123	0.275881	-0.663542	0.00964737	0.916141	1.40306	0.769958	-0.286641	1.02748	-0.820565
-0.79588	1.04015	1.03577	0.835421		-0.79588	-0.0553225	0.630507	0.219349	-0.299676	1.42073	-0.731457	0.000128832	0.492683	0.405939	-0.092313	-0.025255	0.481922	-0.0024433	-0.570395	-0.847979	0.0275966	-0.915196	-2.29258	-1.89685	-0.650311	0.503166	-1.36232	-1.25792	-0.425982	-0.137663
-0.754487	1.03154	1.03555	-0.724204		-0.754487	-0.668313	-0.913765	-0.745753	0.0590297	-0.899074	0.564711	0.00207763	1.12561	-0.534558	-3.72601	-3.62621	0.172269	-0.000827076	-2.69786	0.578411	-0.0868559	-0.0149865	-1.06764	-0.697351	-0.431622	-2.17294	0.987771	-1.93086	1.57685	0.54726
-0.716699	1.03349	1.03533	-0.385248		-0.716699	-0.177943	-0.599842	1.43555	-0.24516	0.318506	-0.115187	-0.00536593	-0.965974	-1.2122	-0.740486	-0.695413	-0.718359	0.00230622	-0.428593	-0.963986	-2.09494	-0.201667	0.57345	0.629846	1.69162	-1.85769	-1.82758	-0.504308	0.0590549	-0.418844
-0.681937	1.03935	1.03512	0.523412		-0.681937	-0.635955	0.399413	-0.492908	0.192186	-0.445077	-0.361453	0.00587703	1.47439	0.816245	-0.271644	-0.208622	0.198217	0.00261103	1.4836	-0.161544	0.418541	-0.9763	0.153578	1.16356	-0.538242	-0.0211542	-1.77529	0.518925	0.790565	-0.598435
-0.649752	1.04846	1.03491	2.29819		-0.649752	-0.0638709	2.1321	-0.233051	0.696632	-1.12999	-0.749225	0.000770319	0.0401693	-0.437508	-0.783966	-0.735926	-0.690175	-0.00108672	0.113689	-0.216484	-0.584103	-0.617387	-0.0239854	0.706721	0.48104	-0.132808	0.909919	0.243765	-1.61327	-1.10598
-0.619789	1.03874	1.03471	0.491931		-0.619789	0.96058	0.375217	0.322242	2.38556	0.420577	-0.486544	-0.0110966	0.591068	-0.755616	-0.61664	-0.534449	-0.190103	0.00185859	-1.54038	-0.444386	0.223529	-0.230851	0.0683229	0.112976	-1.32201	-2.04532	0.460368	0.418456	0.13575	0.388891
-0.59176	1.03629	1.03451	0.513007		-0.59176	-0.862471	0.243875	0.987836	0.715701	0.771943	-0.327314	-0.00684364	-0.738386	0.0799885	-0.291008	-0.194502	-1.05836	-4.25696e-05	-0.259108	-0.375724	-0.991231	0.223464	-0.329665	0.144979	-0.705449	-1.06453	-0.10471	0.273694	0.1757	-0.705876
-0.540608	1.0308	1.03412	-0.616667		-0.540608	0.34712	-0.78218	-1.23234	0.094913	-0.0882715	-0.188537	-0.00517717	0.66789	-0.0561069	-1.27847	-1.23007	0.854661	0.000574842	0.170376	2.3178	-1.05854	-0.355385	-0.712585	0.726337	1.04858	-0.728033	-0.238269	1.06402	-0.344101	-0.174237
-0.49485	1.03153	1.03375	-0.423556		-0.49485	0.804738	-0.585765	0.45956	-0.722459	1.88225	-2.08123	-0.00236315	-1.09721	0.130309	-0.79366	-0.73515	-1.70504	0.000781883	-0.923498	-1.78106	0.0652236	-1.07187	0.222798	-1.75259	-1.18477	-1.3011	0.0867088	0.350246	0.122684	-0.496629
-0.453457	1.03048	1.03339	-0.725857		-0.453457	0.9955	-0.927722	-3.06009	-1.05982	-0.730244	0.222014	-0.0033584	1.20703	-1.10352	-1.55253	-1.50341	-0.576239	0.000776985	1.66542	-1.45793	-0.917517	0.741735	-0.221642	0.460788	-1.97746	-0.173258	-1.47782	0.581216	0.186724	2.20799
-0.415669	1.04158	1.03305	3.51589		-0.415669	-0.514266	3.19695	0.580307	0.135088	-0.255768	-1.13211	-0.00366311	-0.147564	-2.68151	-1.12991	-1.063	-1.01464	0.00285547	1.45505	-0.510763	-0.726323	0.416001	0.427361	-0.513055	0.611415	1.12146	-0.215811	-0.593405	-0.0550742	0.363933
-0.380907	1.03348	1.03272	0.113479		-0.380907	1.21931	0.00354054	-0.913102	-0.398206	-0.0279767	0.471074	-0.00202581	1.5513	-0.729113	3.1433	3.20517	0.922472	-0.00168652	-0.435589	-0.729136	-0.605298	-0.91752	0.608942	0.0560469	-0.344982	0.195038	1.42974	-2.97125	-3.22318	-0.546097
-0.348722	1.03743	1.0324	1.31746		-0.348722	-0.739367	1.13337	0.69347	-0.491164	-0.368816	0.300042	-0.00140595	-4.05417	0.822599	1.63753	1.68117	0.61759	-0.00230595	0.888115	0.0291774	0.115057	-0.111794	-2.39866	-0.428191	-0.10432	0.859614	0.441399	-1.57545	1.08904	-1.82548
-0.318759	1.04064	1.03209	1.86241		-0.318759	-1.50819	1.71677	0.221118	-0.140305	0.224954	-1.173	0.00495546	0.790677	0.0106538	-0.456618	-0.390478	-1.98602	-0.000195704	0.000188857	-0.592472	-0.925876	-0.82461	0.106056	1.51483	-0.827527	-1.37583	2.84002	-0.454109	-0.727362	-2.13974
-0.29073	1.0338	1.0318	0.874389		-0.29073	0.435888	0.596737	0.460625	-0.747075	-0.242172	-0.616012	-0.0015625	0.452975	-0.448381	-0.902633	-0.856661	0.243995	-0.000487691	-0.642403	-3.05244	-1.11916	-1.10788	-0.904966	-0.781227	0.285893	-0.0109601	0.115108	-2.66665	-0.524399	-1.49636
-0.239578	1.02801	1.03124	-0.781885		-0.239578	-2.18708	-0.921069	-0.538067	0.794154	0.493284	1.56521	0.000935317	-0.0174847	0.417633	-0.158752	-0.0915218	-0.228626	0.00384914	-0.224785	0.33917	0.155973	-1.46824	-0.0585261	0.304054	1.6103	-0.66567	0.813611	0.797363	0.670752	-0.949444
-0.19382	1.03237	1.03071	0.424983		-0.19382	2.09978	0.292241	-0.307409	0.49728	0.581505	0.494543	-0.00476947	-0.390053	0.490192	1.11017	1.14064	-1.16062	-0.000637745	-0.913173	-0.268603	-1.19719	0.144163	-0.451349	-1.17832	-0.655903	0.730902	-1.59312	0.0380553	0.236143	-0.408267
-0.152427	1.02995	1.03022	-0.0628653		-0.152427	1.68222	-0.172358	0.549816	0.8712	-0.380485	-1.37957	0.00452418	-1.80365	0.0205055	-0.61992	-0.575743	-0.224086	0.000676938	0.245969	-0.063408	-0.110054	1.84888	-0.294182	-0.801508	0.697289	-0.506605	1.47597	-0.904412	-1.83568	-0.295587
-0.114639	1.02488	1.02976	-1.11544		-0.114639	-1.16887	-1.20992	0.121493	-1.25771	1.85853	0.0864058	-0.00205598	0.234149	-1.2931	-0.864951	-0.846698	-0.964115	-0.00161299	-0.17138	0.23473	-0.142844	0.911696	-0.204223	0.650134	-1.17595	-0.986904	-2.19103	0.133808	1.43889	-0.0968121
-0.0798767	1.02721	1.02933	-0.537764		-0.0798767	0.0102274	-0.630664	0.539856	0.640702	-2.14776	0.430608	0.0028304	-0.998138	0.555251	-1.55103	-1.53688	0.219076	0.000301532	0.841375	-2.09822	0.444019	0.272574	0.662383	0.552148	-0.0653811	0.724289	-0.493649	0.0568564	0.74491	-0.0623155
-0.047692	1.03257	1.02892	1.02688		-0.047692	0.892132	0.936291	1.00635	2.00159	2.24701	-0.586838	0.00643577	1.44769	1.10511	-0.405688	-0.400686	-0.360317	-0.00164158	-0.635254	1.13966	1.77521	-1.4051	-1.14951	-0.165311	1.66134	-1.36736	-0.401213	-0.495395	0.0145189	-0.529332
-0.0177288	1.0307	1.02853	0.636539		-0.0177288	-0.300686	0.554061	-0.408481	-1.79727	-0.937456	-1.43816	-0.00218029	-0.00578697	-0.165194	-0.489782	-0.488815	0.569325	0.000604299	1.14715	0.330089	0.134532	-0.300579	-0.193352	-0.35898	-0.18093	-0.610812	-0.0814674	-0.119298	-1.14483	-1.00724
0.0103	1.02973	1.02817	0.763051		0.0103	-0.284293	0.645505	-1.98309	-3.05945	0.812026	-0.267979	-0.00264416	1.98316	-0.600888	-0.0496349	-0.0532499	-0.102803	0.000603121	-0.66795	0.658942	0.6706	-0.0819403	0.126272	-1.16912	-1.12955	0.225554	-0.460209	0.737317	0.758335	-0.362817
0.0614525	1.02474	1.0275	-0.925066		0.0614525	0.570605	-0.981881	0.30597	0.925429	-2.74164	-0.243692	-0.00134794	-0.823186	1.35861	-0.482367	-0.503299	0.214964	-0.000799718	-1.03336	0.740584	-0.698064	-1.39515	-0.0595488	1.77562	0.500497	0.626344	-0.427531	0.937715	0.904922	0.321792
0.10721	1.0252	1.02689	-0.699307		0.10721	-0.662071	-0.742527	0.0447382	-0.207605	-1.03095	-0.307664	0.000712935	-1.30832	0.376871	-0.288871	-0.318438	0.987512	-0.000940444	0.495278	-1.00025	-2.85456	-0.590905	-0.0669658	0.468481	-0.312163	1.38948	-0.675569	1.14072	-0.176172	0.153743
0.148603	1.0266	1.02634	0.13433		0.148603	0.308795	0.110038	-0.633551	0.581926	-0.120887	-0.364628	-0.00292499	0.449051	1.43774	-1.09026	-1.12421	0.729778	0.000860315	1.31695	-0.472825	0.760719	-0.105275	0.510544	0.089135	-0.418788	1.40569	1.60673	1.06153	-1.12476	0.0109536
0.186391	1.02786	1.02584	0.772951		0.186391	1.83543	0.775296	0.688498	-0.683956	0.667601	1.57954	0.00453786	-1.17348	0.760307	-0.597013	-0.64786	0.523434	-0.000257082	1.96963	0.584957	-0.272953	0.75696	-0.603875	-0.449995	1.57872	1.46749	-0.252641	1.0491	0.328568	2.60731
0.221153	1.02535	1.02538	-0.0156476		0.221153	0.696475	0.0114005	0.0640965	1.1132	1.04395	-0.253748	3.17381e-05	-0.237823	0.302016	-0.376299	-0.431527	1.08297	9.98824e-05	-1.3134	0.471896	1.0778	1.52101	-0.588842	-1.01252	2.12418	0.90362	0.140438	0.318535	0.0541652	2.21753
0.253338	1.02459	1.02496	-0.184982		0.253338	0.65006	-0.136578	1.27417	-0.83175	2.12286	0.189471	-0.00471087	0.471552	0.386544	-1.58911	-1.67501	-1.49047	0.000126357	1.15036	-0.78248	2.48978	-0.908337	0.88368	0.638772	-1.29626	-0.122026	1.4998	0.897449	-0.284671	-0.660416
0.283301	1.02136	1.02458	-1.82407		0.283301	-0.400436	-1.74604	1.1809	0.0560606	-1.79331	-0.108014	-0.00203831	-0.86531	1.10847	-0.107579	-0.169528	-0.408328	0.000311445	-0.349121	0.288895	-0.675719	0.155619	0.727392	0.444069	-0.234903	1.20876	-0.177717	0.194382	-0.721524	-1.32259
0.31133	1.02323	1.02422	-0.445547		0.31133	-0.00623896	-0.367234	-1.22058	1.22449	-0.289316	2.22846	-0.000142192	-0.485047	1.5982	0.0408335	-0.0716288	0.545757	-0.000192426	0.0269856	1.20906	-0.553609	0.722864	-0.0464524	0.786865	1.39383	0.335599	0.202831	-1.11963	0.375699	0.83354
0.362482	1.02177	1.02357	-0.983999		0.362482	-2.1152	-0.85381	0.281232	-0.469456	-1.04908	-0.312136	0.00108573	-0.226022	0.170853	1.12175	0.997655	-1.90594	5.62388e-05	-0.187595	1.39078	-0.00402497	1.08631	1.5285	0.988252	0.674748	-0.0500419	0.931758	0.542762	-0.884734	-0.624609
0.40824	1.02161	1.02301	-1.7919		0.40824	-1.4172	-1.4146	0.381045	-0.832126	-0.672917	1.89563	-0.00051151	0.217437	0.314804	0.305459	0.189848	0.533508	-9.99436e-05	-0.125904	0.17697	0.219426	-1.98282	0.530328	0.728506	0.117861	1.07114	0.154028	0.708606	-0.147802	-1.53423
0.449633	1.0227	1.02252	0.139837		0.449633	0.682182	0.409492	-0.844794	-1.07946	0.624795	0.142118	-0.00196656	-0.0670494	0.64589	1.05424	0.892908	1.07719	0.000414057	-0.378473	1.41498	0.000833459	-0.52544	-0.528884	-1.55518	0.108647	-1.41588	0.273643	-0.905028	0.657836	0.258344
0.487421	1.01927	1.02208	-1.88153		0.487421	1.073	-1.62422	0.240792	0.780974	-0.738453	-0.338717	-0.0017211	0.0462664	-0.123553	0.978153	0.843491	-0.241312	0.000834537	1.00745	2.49068	1.35461	0.642394	0.359674	2.72615	2.43926	1.40927	0.514139	-1.26509	-1.71916	0.174569
0.522183	1.02229	1.02169	0.423848		0.522183	0.384876	0.723515	0.571721	0.616208	-0.914324	-1.36971	-0.00176308	1.17447	0.218245	-0.69903	-0.806799	1.5107	-0.000505536	2.449	0.00405782	0.780464	1.99451	0.37871	1.32153	1.47268	0.899548	-0.703754	0.688242	1.77951	-0.318696
0.554368	1.02204	1.02134	0.451781		0.554368	-0.0500979	0.743292	1.17021	-1.61681	-0.784574	1.71618	0.00184428	-1.07511	-0.824893	1.73014	1.50168	-1.14715	0.000303057	0.00557326	1.50378	0.55719	-0.437449	0.185228	0.813052	0.532204	1.36689	0.684724	0.38101	0.93033	0.284882
0.584331	1.02309	1.02102	0.67125		0.584331	0.311327	0.827304	-1.057	-0.825345	0.763049	0.0248429	0.00183835	-0.0552237	-0.16042	0.234115	0.029165	-0.0476583	-0.00038304	0.472662	-0.31918	0.159734	0.378712	0.584352	1.96453	-0.000513292	-1.27975	-1.51199	0.798924	0.0755419	0.500916
0.61236	1.02187	1.02073	0.550957		0.61236	1.70083	0.796182	0.310176	-0.260754	0.429181	0.300733	0.000165879	-0.642422	-0.231974	0.159179	-0.140565	1.24489	-0.000472095	0.521216	1.1802	-0.247128	1.84445	0.925575	0.265541	0.70385	-0.441018	-0.502845	1.46192	-0.893446	0.714146
0.663512	1.0198	1.02021	-0.236189		0.663512	0.0816649	0.0795461	0.29668	0.285307	0.61466	0.129229	0.00153524	0.147233	0.713042	0.766955	0.58356	0.187616	0.00099128	0.773837	1.96569	0.926834	-0.1466	0.827851	0.491994	-0.173361	-0.0176023	2.00077	0.376368	0.514526	0.410705
0.70927	1.01773	1.01978	-1.17202		0.70927	1.5108	-0.837296	0.911485	-1.08655	1.53546	-2.60168	-0.00318873	0.960074	-1.66383	0.271955	0.0734094	-2.12085	3.59784e-05	-0.569027	1.3412	-0.793236	-1.28994	0.0661362	1.4291	-0.165616	-1.02553	-1.12334	0.00771586	-0.493109	0.398215
0.750663	1.01746	1.0194	-1.26908		0.750663	-1.53123	-0.86747	-0.0763889	1.44639	-0.406249	0.154224	-0.000271585	0.698719	-0.222368	0.658895	0.341999	-0.515087	-0.000365981	-0.415137	-0.328379	0.131653	2.59515	0.270963	0.555631	0.0468238	1.02643	-0.276969	0.961054	3.40614	1.36702
0.788451	1.01588	1.01907	-1.58508		0.788451	0.801956	-1.26859	-0.425004	1.04779	0.672116	0.297538	0.00136148	0.213341	-0.285381	-0.0478805	-0.370633	-0.200862	-0.000979778	0.26432	0.197036	0.41783	1.30246	0.0973314	-0.197485	-0.328463	1.84433	0.901511	-0.547256	-0.102471	0.75603
0.823213	1.01864	1.01877	-0.0720938		0.823213	-0.341789	0.292847	0.310694	0.386401	1.59784	1.08467	0.00136702	1.10749	-0.509388	-0.297559	-0.642836	-0.791475	0.00048975	0.172035	-0.506805	-0.363044	0.480728	1.71343	0.233596	-0.133871	1.41771	1.35357	1.33446	1.86245	1.65715
0.855398	1.01785	1.01851	-0.288434		0.855398	0.637365	0.00485129	0.180662	1.277	0.684867	0.647428	-5.15731e-05	0.880392	0.978222	0.697434	0.477368	-0.150407	-0.000108038	-0.200729	-0.218962	-0.0542928	-0.70425	-0.00790731	-0.571522	-0.135385	1.14669	0.227481	0.803074	0.399869	0.302791
0.885361	1.01578	1.01827	-1.43478		0.885361	0.51943	-1.04061	-1.26723	1.03561	0.42899	-1.17581	0.00235382	-0.0622882	1.09893	0.106007	-0.243096	-0.502918	0.000691093	0.13382	-0.321803	0.496927	-0.0804612	0.734435	0.471437	0.0613742	0.0586847	0.811992	1.09371	-0.97967	0.761819
0.91339	1.0171	1.01805	-0.840674		0.91339	-1.08076	-0.22604	-0.101509	1.15382	0.776836	-0.286408	0.00216163	-0.416395	0.783826	0.181883	-0.143445	-0.0645784	-0.00034559	-0.383145	0.393794	0.0739218	0.074864	-0.270782	-0.208525	0.433699	-0.0668249	-0.425202	1.13169	-1.67476	0.807578
0.964542	1.01674	1.01767	-0.590761		0.964542	-0.0342832	-0.14029	0.790248	-0.0308873	0.115181	-0.749719	0.00132398	-0.0483765	-0.599638	1.12245	0.803264	0.0142575	0.000312295	0.439096	-0.6819	0.321562	-0.260737	0.134513	-0.522871	0.3282	-0.16159	0.764265	0.91513	0.676081	1.22551
1.0103	1.0183	1.01734	0.768824		1.0103	0.951654	1.34127	-0.986148	1.15197	-0.526251	-0.925228	0.000223226	0.20352	-0.244643	0.834199	0.484581	0.597412	-0.000263562	0.0985754	0.13552	0.51638	-0.0112339	0.727788	-2.17909	-0.483103	0.533605	-1.80421	0.361187	-0.48651	1.0727
1.05169	1.01689	1.01705	-0.109469		1.05169	-0.154237	0.388419	-0.373958	0.421909	-0.100752	-1.22338	0.00109066	0.775283	-0.352711	0.57671	0.260639	0.578741	-6.7006e-06	-0.537692	-0.47049	0.00853934	-1.69941	0.388491	0.766076	0.277976	-0.0819249	-0.882553	-0.557421	0.636794	-0.907213
1.08948	1.01542	1.01679	-0.9512		1.08948	-0.459535	-0.448419	0.715947	-1.22629	-0.345528	0.509595	-0.000496998	0.963834	0.489217	-0.0563689	-0.368827	-0.0304011	5.12892e-05	1.189	-0.468044	0.375337	1.18342	-1.28984	-1.20275	-0.579594	0.541592	-1.29796	-0.237673	1.30571	0.404729
1.12424	1.01802	1.01656	0.769609		1.12424	-1.61415	1.15198	0.442931	0.732153	0.865869	-0.814784	0.000391062	0.0233521	0.615958	0.331193	-0.0652427	0.745434	-0.00121544	-0.114474	0.277598	0.54567	0.885828	0.16767	-0.119273	0.178629	0.890316	-0.0919928	0.180925	-0.467665	0.828698
1.15643	1.01627	1.01635	-0.0526111		1.15643	-0.143426	0.391162	0.829931	0.384145	0.109795	-0.244447	0.00156641	-1.04007	0.0766442	0.324346	-0.0255611	-0.419093	2.11337e-05	0.630024	1.09871	0.178415	-0.814901	0.341911	-0.180057	-0.0880476	0.348612	0.499043	0.523806	-1.01547	-0.345006
1.18639	1.01625	1.01616	0.0713361		1.18639	-0.0319497	0.624602	1.66522	1.4534	-0.160712	0.824468	8.1623e-05	0.330101	0.434993	-0.229777	-0.545251	-0.359102	-0.000175326	0.542372	-0.149209	-0.172634	0.245323	-0.884957	0.0739493	-0.0242396	0.649098	-0.297574	-0.847477	-0.689041	0.720063
1.21442	1.01501	1.01598	-0.585158		1.21442	-0.169768	-0.152427	1.05191	-0.0181665	0.299574	0.695563	0.000242175	-0.240752	-0.91675	0.473046	0.159913	0.296572	-0.000162353	-0.288413	-0.89191	-0.104126	0.302358	-0.914264	-0.497206	-0.629693	0.597536	0.412783	-1.25204	-0.543973	0.0556602
1.26557	1.01463	1.01566	-0.756881		1.26557	-0.179437	-0.238127	0.245526	-0.170062	0.0345523	-0.25742	-0.000440274	0.0125734	-0.00132021	0.775291	0.435972	0.0805109	5.65037e-05	-0.165995	0.091887	-0.309718	0.0822238	-0.735444	0.279479	-1.5496	-1.24503	-0.297942	0.145867	-0.952573	0.07697
1.31133	1.01479	1.01537	-0.328477		1.31133	0.83874	0.0621634	-0.333395	0.268452	-0.306429	1.47909	0.000230325	0.00953991	0.0752862	-0.0513893	-0.373364	0.328306	-7.29389e-05	-0.307737	0.0345869	-0.334147	-0.833555	0.12754	1.11802	-0.743776	-0.576023	-1.15696	-0.41135	0.395417	-1.15476
1.35272	1.01408	1.01511	-0.708421		1.35272	1.42149	-0.239938	-0.101801	0.612204	0.165349	1.67679	0.00122577	0.0534692	-0.394011	0.284894	-0.0695092	0.185484	-0.000289147	-1.23087	-0.775712	-0.605282	-1.04817	-0.484822	-0.309217	-0.770983	-1.47233	-0.552092	-0.452007	0.26815	-1.56249
1.39051	1.01485	1.01487	-0.0115331		1.39051	0.574042	0.378784	-0.227892	-0.156636	0.069401	0.33142	-0.000142622	-0.229237	-0.170604	0.622958	0.253781	0.0823346	0.000376639	-0.892978	-0.398379	-0.408324	1.14436	-0.45833	-0.233866	0.111239	0.0321208	-0.70281	-0.508505	0.10138	-0.693843
1.42527	1.01574	1.01465	0.985601		1.42527	0.403463	1.56732	0.645453	0.696443	-0.0942561	0.603094	-8.01017e-05	-0.731623	0.220456	0.68267	0.333974	0.203342	-0.000560845	-0.853015	0.0822202	-0.067051	0.41365	-0.138893	-0.575585	-1.00515	0.946157	-0.364941	-0.915036	0.367414	0.294949
1.45746	1.01564	1.01444	0.728555		1.45746	-0.975685	1.10982	-0.1041	0.395271	-1.05273	-0.47488	-2.64187e-05	0.21387	-0.875965	0.814948	0.370161	1.12313	-3.18702e-06	-0.346503	0.409899	-0.264461	-0.127684	-0.532407	0.362352	-0.405203	0.242646	0.979106	-0.30656	0.0210236	0.967818
1.48742	1.01476	1.01424	0.390234		1.48742	0.573262	0.851926	-0.320304	0.497487	-1.18868	-0.599527	-0.000217741	0.197819	0.163674	0.690699	0.296726	-0.563907	0.00037327	-0.884874	-1.63896	-0.682477	-1.09747	-0.0503619	0.0660775	-0.310074	0.0160306	-0.481995	-0.903281	-0.402767	0.329467
1.51545	1.0146	1.01406	0.481836		1.51545	-0.347491	1.00739	0.0107208	0.541894	-0.306386	-0.223752	-0.000284234	0.0471852	0.289298	0.37926	-0.0543147	-0.106173	0.000224717	-0.749235	-0.63183	-0.721358	-0.649665	-0.609233	0.0304119	-0.540797	-0.306132	0.711911	-0.63855	-1.65287	-0.450422
1.5666	1.01395	1.01372	0.226633		1.5666	-0.608672	0.767313	1.02661	1.05467	0.546538	0.0581317	0.000223944	-0.201689	0.664388	0.320167	-0.0314904	-0.496239	-0.000443166	-0.460299	-0.455266	0.545918	-0.108846	-0.191656	-0.239047	-0.778906	-1.30452	0.549797	-0.78196	-0.619784	-0.30222
1.61236	1.01314	1.0134	-0.247479		1.61236	1.55683	0.253033	0.607219	1.081	-0.269724	-0.3963	-0.000697242	0.122524	0.384895	0.475743	0.0896996	-0.190985	-0.000338451	-0.161704	-0.559525	-0.238271	-0.257351	-0.353018	-1.01419	-0.925086	0.264914	0.0168048	-0.975557	-0.923815	0.158351
1.65375	1.01306	1.01311	-0.0434522		1.65375	-0.591792	0.430815	0.829941	0.811709	-1.01293	0.964107	2.81683e-05	-0.316625	0.876042	0.135664	-0.295077	-0.621797	6.49323e-05	-0.220903	-0.724451	-0.324637	0.122049	0.264967	-0.210743	-0.511456	-0.503658	-0.144967	-0.186753	-0.458837	-0.00388323
1.69154	1.01303	1.01283	0.17184		1.69154	0.308171	0.591501	0.114107	0.830403	0.927304	0.371483	0.000142543	-0.306404	0.182015	0.115056	-0.266055	0.311197	-0.000166721	-0.928757	-0.883814	-0.949527	-0.8725	0.287682	-0.74044	-0.747532	-0.238572	-0.517555	-0.73652	2.1516	-0.0875901
1.7263	1.0126	1.01258	0.0179222		1.7263	1.03675	0.375449	0.223225	0.279886	0.314865	0.899487	-0.00116128	-0.234291	0.568947	-0.267344	-0.67729	-0.167013	0.000268015	-0.178167	-1.10071	-0.104858	0.312479	-0.42812	-0.0587068	-0.0805105	-2.14191	-1.03567	0.127431	1.01653	-0.763612
1.75849	1.0128	1.01234	0.395218		1.75849	0.856098	0.760266	0.555282	0.536263	2.00665	0.320878	-5.4985e-05	-0.0811564	-0.667167	0.644415	0.2193	0.203583	0.000258547	-0.751217	-1.36503	-0.959269	-0.207194	-0.779304	-0.0294406	-0.723355	-0.244559	-0.63744	0.101829	-0.182224	-0.251124
1.78845	1.01258	1.01211	0.338726		1.78845	-0.128498	0.627844	0.522683	0.026493	0.826245	-1.7456	-5.58299e-05	0.13124	-0.23713	0.434823	-0.00657415	0.360591	-0.000114958	-0.847872	-0.901273	-0.845733	0.296566	-0.0807297	-0.870779	0.127103	-0.777657	-0.34506	-0.241456	0.20346	-2.04135
1.81648	1.01211	1.01189	0.192522		1.81648	0.0493828	0.522155	0.315213	0.285837	0.144934	0.0694938	5.17107e-06	0.134161	0.382813	0.056843	-0.385621	0.195563	0.000229829	-0.483467	-0.41206	-0.839672	-0.831254	-0.329843	-0.457767	-0.504713	-0.724641	0.644196	-0.192647	0.673944	-0.919363
1.86763	1.01153	1.01148	0.0352611		1.86763	0.656548	0.297212	0.322239	-0.245136	-0.677531	0.463586	-0.000556262	0.0892256	0.0889128	0.274597	-0.201149	0.1673	0.000122498	-0.295685	-1.4884	0.028735	-1.05012	-0.566466	-0.471647	-0.910997	0.0712864	0.731775	-0.69675	0.491674	-0.50245
1.91339	1.01168	1.01111	0.480485		1.91339	0.790143	0.744957	0.596866	0.418495	-1.09471	-0.963124	-0.000129032	0.0993064	0.56471	0.448779	-0.0851683	0.135488	0.000347377	-0.126468	-0.426492	-0.59063	-0.987836	-0.0434563	-1.20585	-0.034786	-0.687027	0.0779413	-0.219457	0.45847	0.354743
1.95478	1.01139	1.01077	0.559107		1.95478	0.233558	0.811373	0.438355	-0.0855564	-0.361421	-0.0548042	4.91424e-05	-0.225438	0.272389	0.621043	0.0505087	-0.117376	0.00026838	-0.448288	-1.04077	-0.0033056	-0.370744	-0.421196	-0.105074	0.447827	-0.513946	0.219017	0.172567	-0.255375	-1.09249
1.99257	1.01069	1.01045	0.207296		1.99257	1.09607	0.437729	0.843134	0.246657	-0.858851	-0.502436	0.00018005	0.461659	1.31918	0.29743	-0.240658	0.333355	0.000149905	0.100522	-0.345409	-0.910231	-0.502445	-0.868057	-0.486791	0.504873	-0.393173	0.150609	0.149417	0.0216166	-1.28657
2.02733	1.01045	1.01016	0.264993		2.02733	1.01367	0.481305	0.510572	0.316299	-0.50766	-0.823928	-6.79239e-05	-0.551098	0.531751	0.320374	-0.212802	-0.0604296	0.000241698	-0.42569	-0.0924283	-0.309589	-0.109899	-0.0640842	0.37414	1.10155	-0.408204	0.0288328	-0.226453	0.558953	-0.470232
2.05952	1.01084	1.00989	0.745138		2.05952	0.256508	0.916668	0.703204	0.769269	-0.983	1.09873	-0.000693064	-0.761355	0.466116	0.237472	-0.382138	0.430657	-0.00022953	0.0649405	0.404259	-0.144374	0.47719	-0.117234	-0.01271	1.11511	0.609665	-0.540819	0.628792	-1.54501	0.555819
2.08948	1.01008	1.00963	0.381685		2.08948	0.980075	0.554119	0.0680065	0.613161	0.0398607	0.657213	-7.25693e-07	-0.422989	1.33986	0.519737	-0.0761375	1.00213	-6.09331e-05	0.0530027	0.320213	-0.257564	0.328816	-0.838474	-0.395872	1.92984	0.0648874	-1.00467	0.397206	-0.166016	0.564281
2.11751	1.00999	1.00939	0.563332		2.11751	0.740993	0.743494	0.572592	0.425462	0.126871	-0.115031	-0.000335382	-0.370554	0.885137	0.896699	0.239542	0.440984	-0.000154944	0.348434	0.353891	-0.232097	1.15356	-0.263374	-0.0892875	1.7106	0.153439	0.0569396	0.244979	-0.119219	-0.0695041
2.16866	1.00957	1.00895	0.587035		2.16866	0.658005	0.749778	1.05099	0.0821373	-0.790163	-0.256313	0.000261791	-0.270237	1.31527	0.817523	0.147217	0.0503553	8.90446e-05	0.244252	0.0868538	-0.40852	0.415021	0.0190397	0.16343	0.791819	0.444007	0.92571	-0.193167	-0.612713	-0.348891
2.21442	1.0088	1.00856	0.221066		2.21442	1.47957	0.366273	0.978892	0.276986	-0.561598	0.454508	0.000274509	-0.236448	1.69217	1.13537	0.406378	0.443458	0.000126953	0.699812	0.207291	-0.500178	0.515376	-0.115773	-0.136126	1.49301	0.963105	0.611192	0.323267	-0.39048	-0.576897
2.25581	1.00931	1.00821	1.05295		2.25581	1.57983	1.19531	0.593277	0.06208	-0.0374408	-0.42037	2.61424e-05	-0.583762	2.49751	0.51031	-0.210067	0.28532	-9.29887e-05	0.421408	0.816846	0.00144436	-0.185276	0.312375	0.964476	0.419629	1.09463	1.06115	0.527384	-1.42345	0.411997
2.2936	1.0082	1.00789	0.292144		2.2936	2.067	0.428595	0.904301	0.459046	0.635863	1.04745	-0.000243672	-0.01309	0.968932	0.651557	-0.0448616	0.61455	-5.49063e-05	0.323002	0.936973	0.289975	1.04283	0.644138	0.329079	0.548579	0.411361	1.48789	1.11278	-1.58531	0.425532
2.32836	1.00813	1.00761	0.607345		2.32836	2.82008	0.773408	1.26571	0.231616	-0.770893	-0.626921	-9.84344e-05	0.00741877	-0.139992	0.878912	0.0600552	0.3435	0.000396287	0.69411	0.720187	0.521667	-0.00669225	-0.422442	0.336468	0.502133	-0.534137	2.0044	0.844617	1.35263	0.452347
2.36055	1.0078	1.00735	0.524046		2.36055	0.579807	0.689022	0.552675	0.424346	0.149279	-0.291921	7.22866e-05	-0.00103404	0.674213	1.08585	0.175987	0.272098	-2.70919e-05	1.05752	0.422443	0.817185	-0.599004	0.615063	0.0766373	0.522685	-1.28642	1.26079	0.150842	0.629031	1.55512
2.39051	1.00747	1.00711	0.349511		2.39051	0.754342	0.488385	0.128046	0.563959	-0.209194	-0.6285	0.000783508	-0.106387	0.712443	0.652155	-0.130004	0.0878139	-0.000120397	0.813752	0.315623	1.58013	0.296767	0.458987	0.799775	0.345679	-0.726751	1.21921	-0.131979	0.940296	0.163734
2.41854	1.00733	1.00689	0.482853		2.41854	0.550279	0.641945	0.635393	0.625516	0.855988	-0.404994	0.000556397	0.232797	1.11876	0.904482	0.01429	-0.482669	6.80797e-05	1.00664	-0.310592	1.67953	-0.143886	0.65963	0.806268	1.09182	0.0245615	0.970076	0.131393	0.0932549	-0.0640379
2.46969	1.00707	1.0065	0.653778		2.46969	-0.533057	0.833859	1.06793	0.975256	0.156684	-0.677053	-0.000208369	0.301393	-0.456994	1.02457	0.217932	-0.336398	0.00016779	0.793827	-0.273281	1.78529	-0.46996	0.699149	1.25016	0.315719	-0.920154	0.443695	0.788635	0.595437	-0.889796
2.51545	1.00689	1.00616	0.876531		2.51545	-0.737891	1.07979	0.514606	0.664059	-0.185074	-0.65419	-0.000717561	0.0515235	-0.0575571	1.03914	0.139194	0.270869	0.000382571	0.924707	0.115444	1.88777	0.073765	1.12088	0.604372	-0.14893	0.00412522	0.161725	0.0310126	2.20619	0.770081
2.55684	1.00661	1.00587	0.842985		2.55684	-1.33995	1.0488	0.773808	0.6954	0.139167	-0.518024	-0.000441338	0.255891	-0.540699	1.27947	0.323177	0.0630511	4.26357e-05	0.779177	0.790588	1.37099	1.01527	1.79898	0.0482685	0.0453734	0.345453	0.556438	0.435451	0.398365	0.5378
2.59463	1.00602	1.00561	0.536347		2.59463	-0.454214	0.792367	0.905151	1.09892	0.120525	0.29858	0.000329069	0.345233	0.0507303	1.47656	0.179825	0.0336588	-0.000112344	0.289135	-0.0919514	0.993646	0.0147218	1.5298	0.313532	0.24622	0.367101	1.00245	0.879073	-0.720092	-0.028294
2.62939	1.00597	1.00538	0.95111		2.62939	0.575801	1.29577	0.619036	1.33163	-0.599047	1.24823	0.00106747	0.302682	-0.439359	1.39788	0.104897	0.125788	-0.000177049	0.0778508	0.737628	1.07955	1.80917	0.832317	-0.263719	-0.00941943	1.3994	-0.0286895	0.512642	0.283544	0.33334
2.66158	1.00531	1.00518	0.182373		2.66158	0.533708	0.493009	0.303232	1.64746	0.763636	1.01164	0.00077028	0.357521	-0.100188	1.61316	0.274541	-0.744268	-7.20178e-06	0.345874	1.2016	0.953629	0.0724903	-0.0902979	-0.035177	-0.40059	0.500399	0.345497	0.387557	0.890093	0.207806
2.69154	1.00537	1.005	0.509529		2.69154	0.58554	0.835052	0.743776	1.54844	-0.331858	0.37686	7.76516e-05	0.976543	-0.253855	1.27632	0.107917	-1.6036	0.000169801	0.965434	0.696061	1.17094	0.366347	-0.977514	-0.521172	0.794566	-0.0193819	1.72528	-0.692346	-1.15305	0.113759
2.71957	1.00545	1.00484	0.810182		2.71957	0.561366	1.14391	0.921123	1.37586	-0.285697	0.537872	-0.000350259	1.03809	0.032436	0.920331	-0.32847	0.37091	0.000147548	0.632666	0.713906	0.791352	0.358456	-0.364263	-0.146289	0.441951	0.495263	1.69407	-0.256757	0.289178	0.755669
2.77072	1.00451	1.00455	-0.0633575		2.77072	1.50477	0.339112	1.60973	1.08374	0.789285	-0.10737	-0.00036708	0.97738	-0.122699	1.6364	0.366578	0.0422874	-2.25501e-05	0.365996	-0.141788	1.72634	0.156307	0.238297	-0.0522223	-0.482196	0.559813	0.860026	-0.50936	0.0303727	1.07673
2.81648	1.00414	1.00431	-0.208323		2.81648	1.24491	0.148945	1.53717	1.26559	-0.557579	0.261926	-0.000320354	0.373443	0.210902	1.31131	0.0440219	-0.352995	-0.000209325	0.540893	-0.445784	0.609446	0.111859	0.371785	0.313826	-0.824528	0.210826	0.891113	-0.958848	0.252256	1.85576
2.85787	1.00401	1.00411	-0.128532		2.85787	1.23204	0.276723	0.842036	1.21242	0.256627	-0.459805	0.000300876	0.548058	0.398538	1.45968	-0.0720682	-0.126591	-0.000188279	0.249799	0.682023	0.3657	1.01842	0.533031	0.435538	0.553974	2.1573	1.10488	-0.315498	-0.129399	1.15708
2.89566	1.00397	1.00394	0.0587618		2.89566	1.51435	0.634372	1.30603	2.15856	0.389762	0.310191	-0.000537563	0.42892	1.51285	1.05414	-0.502171	-0.381998	0.00021896	-1.22328	0.721677	0.0249174	2.49512	1.22741	0.299608	0.70643	-0.753439	1.99196	-0.15083	-0.263621	-0.379609
2.93042	1.00341	1.00379	-0.615271		2.93042	1.09425	-0.0252741	1.69414	2.3418	1.01129	0.00290624	-0.000380286	-0.790469	1.07117	1.37645	-0.110249	-0.653456	0.000135642	-0.469488	1.23077	0.707134	-0.195998	0.373363	-0.214927	-0.375528	0.30552	0.380943	0.413347	-0.183939	-0.338784
2.96261	1.00385	1.00366	0.432652		2.96261	1.12325	1.28706	1.04704	0.866375	0.743594	-0.268622	0.000507211	-1.54547	0.744458	1.38238	-0.202206	-0.371871	1.73862e-05	-0.549633	0.633989	-0.549605	-0.300812	0.878275	-0.358111	-0.72794	1.41919	0.24411	-0.0785257	-0.756738	-0.623654
2.99257	1.00375	1.00354	0.405135		2.99257	2.2571	1.16741	0.684795	0.812021	2.09947		0.00043808			1.56707		-0.542755	-8.02511e-05	0.199927	0.47297	-1.15495	-0.550184	0.290828	-0.264086	0.0420083	0.118283	-0.655606	0.266793	-0.504321	-0.103423
3.0206	1.00354	1.00344	0.263956		3.0206	1.82295	1.27622	0.786524	0.317537	0.438947		-0.000251544			1.81012		-0.369648	7.75277e-05	0.553524	0.472187	-1.26878	-0.836983	0.226208	-0.0451752	0.671922	-0.715451	-0.314711	-0.0623697	0.0310525	-0.0596385
3.07175	1.00319	1.00326	-0.12316		3.07175	1.50442	0.664893	0.630939	0.108641	-0.287977		-0.000403771			1.39066		-0.349948	-8.68004e-06	0.153888	1.02339	-1.05342	-0.887322	0.855197	-0.233967	1.29669	-0.936766	0.355909	-0.00630315	-0.410282	0.237223
3.11751	1.00327	1.00312	0.30354		3.11751	1.16678	1.20799	0.397165	-0.0101067	-0.186		-0.000500538			0.810483		-0.397039	0.000206027	-0.0125783	0.0241268	0.432881	-0.434376	0.458577	-0.403149	1.52854	-0.806932	-0.492571	-0.0237589	-0.358658	0.228072
3.1589	1.00272	1.003	-0.505696		3.1589	0.662385	0.375194	0.0794846	-0.65128	0.298947		7.67361e-05			0.694737		-0.812604	0.000444876	-0.217306	0.198167	-0.145891	-0.997378	-0.580166	0.0527982	0.631402	-0.874476	0.234269	0.737238	-0.280687	-0.204783
3.19669	1.00217	1.00289	-1.05621		3.19669	0.648425	-0.341993	-0.270692	-1.10617	0.316233		0.000273208			0.9087		0.727499	6.75974e-06	-0.294118	-0.0889257	0.40469	-0.252414	-1.60291	-0.147129	0.0165354	-0.0047869	-0.521276	0.65954	0.0405424	0.0564742
3.23145	1.00201	1.00281	-1.97214		3.23145	0.694385	-0.726678	-0.60646	-1.08479	-0.369247		-0.000528105			0.785177		0.860499	-0.000243251	0.0352514	0.269848	-0.0298078	-1.04909	-1.21384	-0.195712	-0.499003	0.142457	0.192821	0.00104391	-0.127264	-0.05708
3.26364	1.00178	1.00273	-1.53243		3.26364	1.03829	-0.702623	-0.868255	-0.534572	-0.0870726		-0.000261797			0.325236		1.1087	-0.0001308	-0.196183	-0.538652	0.849657	-1.13322	-1.44252	-0.0161902	-0.427993	0.0229919	-0.397234	-0.394881	-0.684612	-0.102174
3.2936	1.00257	1.00267	-0.15246		3.2936	0.873792	0.71866	-0.316058	-0.914109	-1.07306		-0.000582483			0.137715		1.09107	3.68784e-05	-0.264448	-2.12012	-0.189109	-0.641063	-1.42115	0.142345	-0.333347	-0.198409	-0.513622	-0.262399	-0.329336	0.0938072
3.32163	1.00255	1.00261	-0.0623484		3.32163	0.526712	0.55503	0.0151684	-1.04462	-0.0167081		-0.000423901			-0.000896015		1.65965	0.000368397	-0.514477	-2.72865	-0.796366	-0.720474	-0.683236	0.0694638	-1.96007	-0.0446074	0.376461	0.23573	0.087966	0.337222
3.37278	1.00251	1.00251	-0.000308947		3.37278	0.505654	0.535921	0.596919	-0.312506	-0.0681398		-0.000971865			0.633269		1.56414	0.000230621	-0.452916	-1.10558	-1.07301	-1.11185	-0.568077	0.289661	-2.38591	-0.63074	1.09993	0.13069	-0.25966	0.021525
3.41854	1.00253	1.00243	0.0905434		3.41854	0.0642403	0.603128	0.539546	0.42851	-0.50491		-0.00131501			0.227059		0.622659	2.48879e-05	-0.506275	-0.674594	-0.869077	-1.47864	-0.418011	-0.541179	-2.9482	-0.552806	-0.2765	-0.0928068	-0.218997	-0.154245
3.45993	1.00291	1.00236	0.38547		3.45993	-0.91672	0.796612	0.482129	-0.140066	-1.23834		-0.000898655			0.290339		0.454327	0.000330757	-0.940396	0.238333	-1.61867	-0.923767	-0.272031	-0.474242	-0.598654	-0.699901	0.87194	-0.237905	-0.119758	-0.175321
3.49772	1.00285	1.00231	0.39633		3.49772	-3.36763	0.833554	0.360072	-0.0350923	-0.887378		-0.000285624			-0.472841		0.10825	-0.00014907	-0.988362	0.762104	-2.32848	-0.819472	-0.729323	-0.105166	0.564592	-0.710363	-2.69372	0.427952	-0.00106748	-0.461957
3.53248	1.0027	1.00226	0.296178		3.53248	-0.565772	0.702161	-0.0250942	-0.569991	-0.945165		-2.07625e-05			-0.777906		-1.15551	-0.000246038	-0.285328	0.875676	-1.87644	-0.298914	-1.37863	0.085501	0.765521	-0.36652	-1.72125	-0.160753	-0.280601	0.107534
3.56467	1.00177	1.00222	-0.322863		3.56467	-0.122102	0.107294	-0.0900669	-0.340862	-0.709998		0.00166347			-1.53812		-1.08096	-0.000509909	-0.0760431	0.458845	-1.60456	-0.359117	-0.593007	-0.515182	1.40316	-0.780777	-2.31566	-0.30569	-0.204241	-0.30699
3.59463	1.00158	1.00219	-0.560745		3.59463	0.682771	0.00260848	0.17864	0.0809728	-1.05487		0.00182523			-1.71635		-0.79938	-0.000306146	0.110553	-0.952522	-1.80204	-0.490501	-1.17319	-0.165395	0.596836	-0.667385	-2.29168	-0.673649	-0.0463851	-0.274232
3.62266	1.00161	1.00216	-0.450479		3.62266	0.450278	0.0560726	0.161055	0.152727	-1.1693		0.000669866			-0.7475		-0.15287	-0.000441922	0.436148	-0.426161	-0.204813	-0.176869	-0.613309	-0.101911	-1.074	-0.727679	-0.384068	-1.29955	0.394879	-1.6235
3.67381	1.00252	1.00211	0.599161		3.67381	-0.478693	1.52821	0.533622	-0.336381	-0.71456		0.00106922			-0.438412		-0.218152	-0.000550692	-0.236572	-0.275183	-0.706846	-0.212644	-0.460205	-0.240308	0.648923	-0.109079	-0.0143119	-0.868797	-0.0449849	-1.80846

## Sheet: Figure 4 supplement 1
Sample names
Column1	Column2
B10	SGFP2-CTNNB1 clone 2
WNT3A	3-5h 100ng/ml WNT3A
BSA	0.1% BSA in PBS matched to WNT3A volume
e.g. c1	number of cell measured
cyto	cytoplasm ROI
nucleus	nucleus ROI
Source data		plotted parameter	Additional parameters
Sample	Measurement date	Fast diffusion coefficient	Fraction with the fast diffusion coefficient	Fraction with slow diffusion coefficient	Total SGFP2-CTNNB1 concentration	Slow SGFP2-CTNNB1 concentration	Fast SGFP2-CTNNB1 concentration	Slow diffusion coefficient
B10 WNT3A c1 cyto	180926	33.5211	0.565	0.435	222.955	96.9855	125.97	0.477087
B10 WNT3A c1 nucleus	180926	7.15041	0.668	0.332	452.846	150.345	302.501	0.111809
B10 WNT3A c2 cyto	180926	8.91519	0.786	0.214	254.392	54.4399	199.952	0.28892
B10 WNT3A c3 cyto	180926	7.88361	0.783	0.217	250.414	54.3399	196.074	0.193457
B10 WNT3A c3 nucleus	180926	12.659	0.692	0.308	386.212	118.953	267.259	0.283491
B10 WNT3A c4 cyto	180926	28.4559	0.615	0.385	237.901	91.592	146.309	1.2682
B10 WNT3A c4 nucleus	180926	7.8065	0.688	0.312	420.332	131.144	289.188	0.111737
B10 WNT3A c5 cyto	180926	13.0636	0.679	0.321	520.247	166.999	353.248	0.454449
B10 WNT3A c5 nucleus	180926	22.8969	0.662	0.338	325.193	109.915	215.278	0.397358
B10 BSA c1 cyto	180926	15.7672	0.635	0.365	215.739	78.7446	136.994	0.221177
B10 BSA c1 nucleus	180926	11.5114	0.596	0.404	165.975	67.054	98.9212	0.195319
B10 BSA c2 cyto	180926	16.5129	0.809	0.191	201.59	38.5036	163.086	0.338967
B10 BSA c2 nucleus	180926	22.4672	0.973	0.02675	176.536	4.72235	171.77	0.112185
B10 BSA c3 cyto	180926	33.4542	0.541	0.459	110.715	50.8181	59.8967	0.157607
B10 BSA c4 cyto	180926	9.35821	0.918	0.08239	197.645	16.284	181.438	0.112266
B10 BSA c4 nucleus	180926	29.5601	0.978	0.02242	141.634	3.17543	138.518	0.111815
B10 BSA c5 cyto	180926	14.4612	0.621	0.379	240.724	91.2345	149.49	0.115618
B10 BSA c5 nucleus	180926	30.8666	0.922	0.07757	240.23	18.6346	221.492	0.291823
B10 BSA c1 cyto	181003	8.94995	0.776	0.224	113.568	25.4392	88.1288	0.13129
B10 BSA c1 nucleus	181003	14.8913	0.848	0.152	98.1483	14.9185	83.2297	0.152575
B10 BSA c2 cyto	181003	15.6769	0.733	0.267	121.718	32.4988	89.2197	0.135063
B10 BSA c2 nucleus	181003	29.8978	0.947	0.05334	61.7516	3.29383	58.4788	0.513274
B10 BSA c3 cyto	181003	12.3098	0.699	0.301	130.729	39.3495	91.3797	0.225839
B10 BSA c3 nucleus	181003	28.6984	0.959	0.04134	122.309	5.05626	117.294	0.6438
B10 BSA c4 cyto	181003	7.38303	0.738	0.262	205.57	53.8593	151.71	0.134839
B10 BSA c4 nucleus	181003	24.1425	0.669	0.331	118.313	39.1615	79.1513	0.306571
B10 WNT3A c1 cyto	181003	9	0.713	0.287	237.308	68.1075	169.201	0.304436
B10 WNT3A c1 nucleus	181003	6.628	0.673	0.327	252.99	82.7278	170.262	0.142704
B10 WNT3A c2 cyto	181003	10.9989	0.698	0.302	264.163	79.7773	184.386	0.211981
B10 WNT3A c3 cyto	181003	16.8681	0.656	0.344	263.779	90.7399	173.039	0.853243
B10 WNT3A c4 cyto	181003	7.9777	0.848	0.152	242.469	36.8553	205.614	0.238277
B10 WNT3A c4 nucleus	181003	9.39397	0.693	0.307	500.619	153.69	346.929	0.142156
B10 WNT3A c5 cyto	181003	6.85866	0.656	0.344	164.538	56.6011	107.937	0.218808
B10 WNT3A c5 nucleus	181003	8.73541	0.727	0.273	229.125	62.551	166.574	0.132704
B10 WNT3A c6 cyto	181003	7.26637	0.816	0.184	95.7942	17.6261	78.1681	0.189617
B10 WNT3A c7 cyto	181003	12.4929	0.549	0.451	144.34	65.0974	79.2427	0.684578
B10 WNT3A c7 nucleus	181003	7.03863	0.777	0.223	259.562	57.8822	201.679	0.129141
B10 WNT3A c8 cyto	181003	9.35303	0.769	0.231	316.98	73.2225	243.758	0.129217
B10 WNT3A c8 nucleus	181003	8.73937	0.65	0.35	266.581	93.3034	173.278	0.129313
B10 WNT3A c9 cyto	181003	14.3599	0.661	0.339	130.422	44.2131	86.209	0.204485
B10 WNT3A c9 nucleus	181003	9.15789	0.717	0.283	194.243	54.9709	139.273	0.130225
B10 WNT3A c10 cyto	181003	11.9665	0.791	0.209	251.995	52.667	199.328	0.200869
B10 WNT3A c10 nucleus	181003	9.99172	0.746	0.254	354.618	90.0729	264.545	0.135411
B10 BSA c5 cyto	181003	10.3063	0.552	0.448	218.908	98.0707	120.837	0.134426
B10 BSA c6 cyto	181003	1.96241	0.794	0.206	397.237	81.8308	315.406	0.207615
B10 BSA c6 nucleus	181003	6.02997	0.762	0.238	125.119	29.7784	95.3408	0.137769
B10 BSA c7 cyto	181003	14.9605	0.639	0.361	208.29	75.1928	133.098	0.145193
B10 BSA c7 nucleus	181003	11.0051	1	0.0003486	133.586	0.0465683	133.586	0.168477
B10 BSA c8 cyto	181003	14.7548	0.603	0.397	404.579	160.618	243.961	0.131273
B10 BSA c8 nucleus	181003	23.1861	0.958	0.0419	76.3773	3.20021	73.1694	0.143307
B10 BSA c9 nucleus	181003	35.9665	0.951	0.04927	75.7327	3.73135	72.0218	0.296636
B10 BSA c10 cyto	181003	12.8247	0.524	0.476	144.412	68.7403	75.6721	0.129085
B10 BSA c10 nucleus	181003	19.0661	0.712	0.288	114.587	33.0011	81.586	0.133228
B10 BSA c1 cyto	181005	14.8954	0.603	0.397	108.921	43.2415	65.6792	0.127167
B10 BSA c1 nucleus	181005	14.8954	0.62	0.38	55.7145	21.1715	34.543	0.127768
B10 BSA c2 cyto	181005	14.8954	0.272	0.728	225.09	163.866	61.2245	0.127172
B10 BSA c2 nucleus	181005	14.8954	0.471	0.529	77.6272	41.0648	36.5624	0.127346
B10 BSA c3 cyto	181005	14.8954	0.828	0.172	243.421	41.8685	201.553	0.128487
B10 BSA c3 nucleus	181005	14.8954	0.896	0.104	208.591	21.6935	186.897	0.198745
B10 BSA c4 cyto	181005	14.8954	0.621	0.379	63.4133	24.0336	39.3796	0.134189
B10 BSA c4 nucleus	181005	14.8954	0.528	0.472	67.802	32.0025	35.7994	0.134966
B10 BSA c5 cyto	181005	14.8954	0.473	0.527	129.147	68.0602	61.0863	0.127154
B10 BSA c5 nucleus	181005	14.8954	0.542	0.458	64.5922	29.5832	35.009	0.127214
B10 BSA c6 cyto	181005	14.8954	0.578	0.422	75.9509	32.0513	43.8996	0.127422
B10 BSA c6 nucleus	181005	14.8954	0.53	0.47	88.3262	41.5133	46.8129	0.143737
B10 WNT3A c1 cyto	181005	14.8954	0.662	0.338	115.174	38.9289	76.2454	0.463646
B10 WNT3A c1 nucleus	181005	14.8954	0.556	0.444	334.848	148.673	186.176	0.244895
B10 WNT3A c2 cyto	181005	14.8954	0.63	0.37	156.69	57.9752	98.7145	0.15616
B10 WNT3A c3 cyto	181005	14.8954	0.544	0.456	144.18	65.746	78.4338	0.413921
B10 WNT3A c3 nucleus	181005	14.8954	0.712	0.288	230.239	66.309	163.931	0.370222
B10 WNT3A c4 cyto	181005	14.8954	0.488	0.512	145.872	74.6866	71.1857	0.237981
B10 WNT3A c4 nucleus	181005	14.8954	0.636	0.364	211.222	76.8846	134.337	0.159484
B10 WNT3A c5 cyto	181005	14.8954	0.603	0.397	114.896	45.6136	69.2822	0.572554
B10 WNT3A c5 nucleus	181005	14.8954	0.782	0.218	222.715	48.5519	174.163	0.1432
B10 WNT3A c6 cyto	181005	14.8954	0.542	0.458	124.33	56.9433	67.387	0.838916
B10 WNT3A c6 nucleus	181005	14.8954	0.666	0.334	193.602	64.663	128.939	0.178309
B10 BSA c7 cyto	181005	14.8954	0.755	0.245	232.763	57.027	175.736	1.33422
B10 BSA c7 nucleus	181005	14.8954	0.742	0.258	302.188	77.9645	224.223	0.146731
