# Supplementary material for: Quantitative live-cell imaging and computational modeling shed new light on endogenous WNT/CTNNB1 signaling dynamics
Source: eLife. 2021 Jun 30;10:e66440. doi: 10.7554/eLife.66440 (PMC8341982; doi:10.7554/eLife.66440)
Supplement: Figure 5—source data 1. [file elife-66440-fig5-data1.xlsx]

## Sheet: Figure 5A-E, supp 1B
Sample names
Column1	Column2
B10	SGFP2-CTNNB1 clone 2
WNT3A	3-5h 100ng/ml WNT3A
BSA	0.1% BSA in PBS matched to WNT3A volume
e.g. c1	number of cell measured
cyto	cytoplasm ROI
nucleus	nucleus ROI
Source data
		Figure 5A	Figure 5B	Figure 5C	Figure 5D	Figure 5E	Figure 5 supplement 1B	Table ?	Not shown	Not shown
Sample	Measurement date	Total SGFP2-CTNNB1 concentration	Fast SGFP2-CTNNB1 concentration	Slow SGFP2-CTNNB1 concentration	Fraction with slow diffusion coefficient	Slow diffusion coefficient	Average fluorescence	Total SGFP2-CTNNB1 particle number	Fraction with the fast diffusion coefficient	Fast diffusion coefficient
B10 WNT3A c1 cyto	180926	250.188	145.109	105.079	0.42	0.366519	12	97.3662	0.58	14.8983
B10 WNT3A c2 cyto	180926	243.405	167.706	75.6988	0.311	0.624625	17.5	94.7262	0.689	14.8983
B10 WNT3A c3 cyto	180926	233.14	162.732	70.4083	0.302	0.414035	25	90.7316	0.698	14.8983
B10 WNT3A c3 nucleus	180926	377.338	256.967	120.371	0.319	0.318194	24.5	146.849	0.681	14.8983
B10 WNT3A c4 cyto	180926	256.427	180.781	75.646	0.295	0.800141	20.5	99.7942	0.705	14.8983
B10 WNT3A c4 nucleus	180926	379.443	254.227	125.216	0.33	0.149906	18	147.669	0.67	14.8983
B10 WNT3A c5 cyto	180926	509.784	341.046	168.739	0.331	0.488176	22	198.394	0.669	14.8983
B10 WNT3A c5 nucleus	180926	346.378	237.615	108.763	0.314	0.301281	22.5	134.8	0.686	14.8983
B10 BSA c1 cyto	180926	217.801	138.521	79.2796	0.364	0.21587	10.25	84.762	0.636	14.8983
B10 BSA c1 nucleus	180926	161.644	94.5619	67.0823	0.415	0.234187	7.25	62.9074	0.585	14.8983
B10 BSA c2 cyto	180926	205.869	168.195	37.6741	0.183	0.294329	7.25	80.1185	0.817	14.8983
B10 BSA c2 nucleus	180926	192.253	192.253	0.0834956	0.0004343	1.67606	4.75	74.8196	1	14.8983
B10 BSA c3 cyto	180926	126.965	64.1171	62.8475	0.495	0.127864	6.25	49.4111	0.505	14.8983
B10 BSA c4 cyto	180926	171.462	155.002	16.5306	0.09641	0.160051	6.15	66.7282	0.904	14.8983
B10 BSA c4 nucleus	180926	177.647	177.647	0.0157964	8.892e-05	0.452303	3.65	69.1352	1	14.8983
B10 BSA c5 cyto	180926	239.395	148.904	90.4913	0.378	0.116891	7.5	93.1658	0.622	14.8983
B10 BSA c5 nucleus	180926	319.402	298.002	21.4159	0.06705	0.180099	4.6	124.302	0.933	14.8983
B10 BSA c1 cyto	181003	100.084	76.9646	23.1194	0.231	0.172174	6.15	55.2239	0.769	14.9028
B10 BSA c1 nucleus	181003	99.3769	83.576	15.8009	0.159	0.129248	4	54.8338	0.841	14.9028
B10 BSA c2 cyto	181003	127.186	91.4469	35.7393	0.281	0.128885	6	70.1783	0.719	14.9028
B10 BSA c2 nucleus	181003	79.5264	77.9359	1.60961	0.02024	0.129139	3.45	43.8808	0.98	14.9028
B10 BSA c3 cyto	181003	126.114	87.6492	38.4648	0.305	0.247971	8	69.5867	0.695	14.9028
B10 BSA c3 nucleus	181003	158.019	158.019	8.43349e-06	5.337e-08	0.402375	3.75	87.1913	1	14.9028
B10 BSA c4 cyto	181003	179.944	128.3	51.644	0.287	0.199572	8.5	99.2889	0.713	14.9028
B10 BSA c4 nucleus	181003	131.269	86.8999	44.3688	0.338	0.264804	6.15	72.4309	0.662	14.9028
B10 WNT3A c1 cyto	181003	222.865	145.976	76.8883	0.345	0.47219	19	122.971	0.655	14.9028
B10 WNT3A c1 nucleus	181003	235.149	139.208	95.9406	0.408	0.276293	19.5	129.749	0.592	14.9028
B10 WNT3A c2 cyto	181003	253.636	171.712	81.9244	0.323	0.268421	24.5	139.95	0.677	14.9028
B10 WNT3A c2 nucleus	181003	278.176	179.702	98.4744	0.354	0.129018	21	153.491	0.646	14.9028
B10 WNT3A c3 cyto	181003	267.135	180.583	86.5518	0.324	0.783148	25	147.399	0.676	14.9028
B10 WNT3A c3 nucleus	181003	275.08	184.029	91.0516	0.331	0.128763	20.5	151.783	0.669	14.9028
B10 WNT3A c4 cyto	181003	221.078	166.029	55.0483	0.249	0.58483	22.5	121.985	0.751	14.9028
B10 WNT3A c4 nucleus	181003	451.313	315.016	136.296	0.302	0.128791	24	249.023	0.698	14.9028
B10 WNT3A c5 cyto	181003	153.962	86.8345	67.1274	0.436	0.389772	14	84.9525	0.564	14.9028
B10 WNT3A c5 nucleus	181003	210.156	147.32	62.8368	0.299	0.197311	15	115.959	0.701	14.9028
B10 WNT3A c6 cyto	181003	86.6142	62.3622	24.252	0.28	0.465173	11.5	47.7916	0.72	14.9028
B10 WNT3A c6 nucleus	181003	179.75	126.364	53.3857	0.297	0.128877	11.5	99.1817	0.703	14.9028
B10 WNT3A c7 cyto	181003	142.606	74.4405	68.1658	0.478	0.753688	15.25	78.6867	0.522	14.9028
B10 WNT3A c7 nucleus	181003	224.053	166.696	57.3576	0.256	0.214319	14	123.627	0.744	14.9028
B10 WNT3A c8 cyto	181003	295.417	217.132	78.2856	0.265	0.203207	27.5	163.004	0.735	14.9028
B10 WNT3A c8 nucleus	181003	245.169	157.398	87.7704	0.358	0.137608	18.5	135.278	0.642	14.9028
B10 WNT3A c9 cyto	181003	129.648	85.5678	44.0804	0.34	0.2083	9	71.5367	0.66	14.9028
B10 WNT3A c9 nucleus	181003	181.124	127.149	53.9749	0.298	0.199457	8.25	99.9398	0.702	14.9028
B10 WNT3A c10 cyto	181003	241.397	187.807	53.5902	0.222	0.251655	17	133.197	0.778	14.9028
B10 WNT3A c10 nucleus	181003	325.286	241.037	84.249	0.259	0.135946	19	179.485	0.741	14.9028
B10 BSA c5 cyto	181003	210.319	114.414	95.9055	0.456	0.128803	13	116.049	0.544	14.9028
B10 BSA c5 nucleus	181003	138.06	80.0749	57.9853	0.42	0.128792	8.75	76.1783	0.58	14.9028
B10 BSA c6 cyto	181003	432.278	0.0110101	432.278	1	1.31899	12	238.521	2.547e-05	14.9028
B10 BSA c6 nucleus	181003	111.003	74.7048	36.2979	0.327	0.310599	7.75	61.2486	0.673	14.9028
B10 BSA c7 cyto	181003	209.282	132.894	76.388	0.365	0.128818	8	115.477	0.635	14.9028
B10 BSA c7 nucleus	181003	122.057	119.005	3.10391	0.02543	0.131589	3.65	67.348	0.975	14.9028
B10 BSA c8 cyto	181003	411.831	242.156	169.674	0.412	0.128941	10	227.238	0.588	14.9028
B10 BSA c8 nucleus	181003	90.9614	88.1416	2.80161	0.0308	0.128814	4.25	50.1903	0.969	14.9028
B10 BSA c9 nucleus	181003	108.829	105.129	3.67734	0.03379	0.12884	2.4	60.0493	0.966	14.9028
B10 BSA c10 cyto	181003	141.571	74.4665	67.1048	0.474	0.12983	8	78.1157	0.526	14.9028
B10 BSA c10 nucleus	181003	126.011	86.1915	39.8195	0.316	0.129476	4.75	69.5298	0.684	14.9028
B10 BSA c1 cyto	181005	108.921	65.6792	43.2415	0.397	0.127167	8	65.8295	0.603	14.8954
B10 BSA c1 nucleus	181005	55.7145	34.543	21.1715	0.38	0.127768	4.25	33.6727	0.62	14.8954
B10 BSA c2 cyto	181005	225.09	61.2245	163.866	0.728	0.127172	6.75	136.04	0.272	14.8954
B10 BSA c2 nucleus	181005	77.6272	36.5624	41.0648	0.529	0.127346	6.25	46.9164	0.471	14.8954
B10 BSA c3 cyto	181005	243.421	201.553	41.8685	0.172	0.128487	8.75	147.119	0.828	14.8954
B10 BSA c3 nucleus	181005	208.591	186.897	21.6935	0.104	0.198745	5.4	126.068	0.896	14.8954
B10 BSA c4 cyto	181005	63.4133	39.3796	24.0336	0.379	0.134189	7	38.3257	0.621	14.8954
B10 BSA c4 nucleus	181005	67.802	35.7994	32.0025	0.472	0.134966	4.75	40.9782	0.528	14.8954
B10 BSA c5 cyto	181005	129.147	61.0863	68.0602	0.527	0.127154	6.75	78.0536	0.473	14.8954
B10 BSA c5 nucleus	181005	64.5922	35.009	29.5832	0.458	0.127214	5	39.0382	0.542	14.8954
B10 BSA c6 cyto	181005	75.9509	43.8996	32.0513	0.422	0.127422	7.5	45.9032	0.578	14.8954
B10 BSA c6 nucleus	181005	88.3262	46.8129	41.5133	0.47	0.143737	6.5	53.3826	0.53	14.8954
B10 WNT3A c1 cyto	181005	115.174	76.2454	38.9289	0.338	0.463646	17.5	69.6091	0.662	14.8954
B10 WNT3A c1 nucleus	181005	334.848	186.176	148.673	0.444	0.244895	16	202.376	0.556	14.8954
B10 WNT3A c2 cyto	181005	156.69	98.7145	57.9752	0.37	0.15616	14.5	94.7002	0.63	14.8954
B10 WNT3A c3 cyto	181005	144.18	78.4338	65.746	0.456	0.413921	16.25	87.1394	0.544	14.8954
B10 WNT3A c3 nucleus	181005	230.239	163.931	66.309	0.288	0.370222	16.5	139.152	0.712	14.8954
B10 WNT3A c4 cyto	181005	145.872	71.1857	74.6866	0.512	0.237981	14.5	88.1623	0.488	14.8954
B10 WNT3A c4 nucleus	181005	211.222	134.337	76.8846	0.364	0.159484	15	127.658	0.636	14.8954
B10 WNT3A c5 cyto	181005	114.896	69.2822	45.6136	0.397	0.572554	17	69.4407	0.603	14.8954
B10 WNT3A c5 nucleus	181005	222.715	174.163	48.5519	0.218	0.1432	15.5	134.605	0.782	14.8954
B10 WNT3A c6 cyto	181005	124.33	67.387	56.9433	0.458	0.838916	16.5	75.1428	0.542	14.8954
B10 WNT3A c6 nucleus	181005	193.602	128.939	64.663	0.334	0.178309	14.5	117.009	0.666	14.8954
B10 BSA c7 cyto	181005	232.763	175.736	57.027	0.245	1.33422	20.5	140.677	0.755	14.8954
B10 BSA c7 nucleus	181005	302.188	224.223	77.9645	0.258	0.146731	22.25	182.636	0.742	14.8954

## Sheet: Figure 5 supp 1C
Sample names
Column1	Column2
B10	SGFP2-CTNNB1 clone 2
WNT3A	3-5h 100ng/ml WNT3A
BSA	0.1% BSA in PBS matched to WNT3A volume
e.g. c1	number of cell measured
cyto	cytoplasm ROI
nucleus	nucleus ROI
Measurement date	sample	lifetime (ns)	lifetime error (from fit, ns)
180926	23 B10 BSA c5 nucleus	2.984	0.015
180926	22 B10 BSA c5 cyto	2.847	0.0066
180926	21 B10 BSA c4 nucleus	3.065	0.012
180926	20 B10 BSA c4 cyto	2.955	0.0069
180926	18 B10 BSA c3 cyto	3.145	0.0058
180926	17 B10 BSA c2 nucleus	2.993	0.0069
180926	16 B10 BSA c2 cyto	3.007	0.0061
180926	15 B10 BSA c1 nucleus	3.03	0.011
180926	14 B10 BSA c1 cyto	2.955	0.0042
180926	13 B10 WNT3A c5 nucleus	2.844	0.0018
180926	12 B10 WNT3A c5 cyto	2.867	0.0038
180926	11 B10 WNT3A c4 nucleus	2.861	0.0036
180926	10 B10 WNT3A c4 cyto	2.887	0.0026
180926	09 B10 WNT3A c3 nucleus	2.9	0.0029
180926	08 B10 WNT3A c3 cyto	2.923	0.0028
180926	07 B10 WNT3A c2 nucleus	2.891	0.0048
180926	06 B10 WNT3A c2 cyto	2.921	0.0035
181003	52 B10 BSA c7 nucleus	2.967	0.007
181003	51 B10 BSA c7 cyto	2.8813	0.0034
181003	50 B10 BSA c6 nucleus	2.9194	0.0049
181003	49 B10 BSA c6 cyto	2.871	0.0046
181003	48 B10 BSA c5 nucleus	2.8707	0.0019
181003	47 B10 BSA c5 cyto	2.8527	0.0026
181003	45 B10 WNT3A c10 cyto	2.9085	0.0022
181003	46 B10 WNT3A c10 nucleus	2.8959	0.0036
181003	44 B10 WNT3A c9 nucleus	2.894	0.0058
181003	43 B10 WNT3A c9 cyto	2.9345	0.0054
181003	32 B10 WNT3A c8 nucleus	2.8813	0.0024
181003	31 B10 WNT3A c8 cyto	2.9065	0.0023
181003	30 B10 WNT3A c7 nucleus	2.9049	0.0054
181003	29 B10 WNT3A c7 cyto	2.911	0.003
181003	28 B10 WNT3A c6 nucleus	2.914	0.005
181003	27 B10 WNT3A c6 cyto	2.9748	0.0029
181003	26 B10 WNT3A c5 nucleus	2.8752	0.0022
181003	25 B10 WNT3A c5 cyto	2.9327	0.0038
181003	24 B10 WNT3A c4 nucleus	2.8787	0.0044
181003	23 B10 WNT3A c4 cyto	2.8749	0.0036
181003	22 B10 WNT3A c3 nucleus	2.865	0.0022
181003	21 B10 WNT3A c3 cyto	2.916	0.0054
181003	20 B10 WNT3A c2 nucleus	2.8827	0.0027
181003	19 B10 WNT3A c2 cyto	2.8913	0.0027
181003	18 B10 WNT3A c1 nucleus	2.8656	0.0026
181003	17 B10 WNT3A c1 cyto	2.896	0.0039
181003	16 B10 BSA c4 nucleus	2.995	0.006
181003	15 B10 BSA c4 cyto	2.9496	0.0037
181003	14 B10 BSA c3 nucleus	2.9209	0.0059
181003	13 B10 BSA c3 cyto	2.821	0.005
181003	12 B10 BSA c2 nucleus	2.952	0.006
181003	11 B10 BSA c2 cyto	2.9332	0.0043
181003	10 B10 BSA c1 nucleus	3.02	0.011
181003	09 B10 BSA c1 cyto	2.9767	0.0069
181005	28 B10 BSA c7 nucleus	2.8823	0.0023
181005	27 B10 BSA c7 cyto	2.894	0.003
181005	26 B10 WNT3A c6 nucleus	2.879	0.0028
181005	25 B10 WNT3A c6 cyto	2.917	0.0034
181005	24 B10 WNT3A c5 nucleus	2.893	0.0024
181005	23 B10 WNT3A c5 cyto	2.918	0.0023
181005	22 B10 WNT3A c4 nucleus	2.885	0.0023
181005	21 B10 WNT3A c4 cyto	2.951	0.0057
181005	20 B10 WNT3A c3 nucleus	2.893	0.0045
181005	19 B10 WNT3A c3 cyto	2.9	0.0034
181005	18 B10 WNT3A c2 cyto	2.891	0.003
181005	17 B10 WNT3A c1 nucleus	2.874	0.0031
181005	16 B10 WNT3A c1 cyto	2.919	0.0029
181005	15 B10 BSA c6 nucleus	2.969	0.0053
181005	14 B10 BSA c6 cyto	2.961	0.0062
181005	13 B10 BSA c5 nucleus	3	0.0054
181005	12 B10 BSA c5 cyto	2.921	0.005
181005	11 B10 BSA c4 nucleus	3.089	0.0074
181005	10 B10 BSA c4 cyto	2.996	0.0037
181005	09 B10 BSA c3 nucleus	2.945	0.0029
181005	08 B10 BSA c3 cyto	2.917	0.0024
181005	07 B10 BSA c2 nucleus	3.051	0.005
181005	06 B10 BSA c2 cyto	3.044	0.0038
181005	05 B10 BSA c1 nucleus	3.018	0.0068
181005	04 B10 BSA c1 cyto	2.96	0.0081

## Sheet: Figure 5H, supp 1A
Measurement Date	measurement	Clone	Fluorophore	localization	treatment	cell	Average intensity (kCnts)	Raw Particle Number	Particle number (corrected for Shape factor J=0.3536)	Raw Brightness (a.u.)	Normalized brightness (a.u., EGFP-monomer set to 1)
191114	10	WT parental	EGFP-monomer	nucleus	-	1	3.369	30.382	85.9219	1.068	1.07087
191114	10	WT parental	EGFP-monomer	cytoplasm	-	1	2.762	25.889	73.2155	1.095	1.23377
191114	11	WT parental	EGFP-dimer	nucleus	-	1	7.56	48.1	136.029	1.124	1.95276
191114	11	WT parental	EGFP-dimer	cytoplasm	-	1	7.133	42.212	119.378	1.148	1.92208
191114	12	WT parental	EGFP-dimer	nucleus	-	2	4.527	31.408	88.8235	1.102	1.6063
191114	12	WT parental	EGFP-dimer	cytoplasm	-	2	4.18	32.659	92.3614	1.099	1.28571
191114	12	WT parental	EGFP-dimer	cytoplasm	-	1	2.983	30.235	85.5062	1.128	1.66234
191114	12	WT parental	EGFP-dimer	nucleus	-	1	3.029	26.463	74.8388	1.104	1.6378
191114	13	WT parental	EGFP-dimer	nucleus	-	1	1.205	15.429	43.634	1.075	1.1811
191114	13	WT parental	EGFP-dimer	cytoplasm	-	1	1.479	17.146	48.4898	1.099	1.28571
191114	14	WT parental	EGFP-dimer	nucleus	-	1	6.625	47.242	133.603	1.094	1.48031
191114	14	WT parental	EGFP-dimer	cytoplasm	-	1	5.026	34.933	98.7924	1.143	1.85714
191114	15	WT parental	EGFP-monomer	nucleus	-	1	6.081	48.808	138.032	1.072	1.13386
191114	15	WT parental	EGFP-monomer	cytoplasm	-	1	4.471	34.692	98.1109	1.115	1.49351
191114	16	WT parental	EGFP-monomer	nucleus	-	1	7.576	53.869	152.344	1.057	0.897638
191114	16	WT parental	EGFP-monomer	cytoplasm	-	1	6.985	47.853	135.331	1.084	1.09091
191114	16	WT parental	EGFP-monomer	nucleus	-	2	0.926	15.71	44.4287	1.058	0.913386
191114	16	WT parental	EGFP-monomer	cytoplasm	-	2	0.902	13.67	38.6595	1.049	0.636364
191114	18	WT parental	EGFP-monomer	nucleus	-	2	8.141	55.335	156.49	1.07	1.10236
191114	18	WT parental	EGFP-monomer	cytoplasm	-	2	10.104	61.902	175.062	1.07	0.909091
191114	18	WT parental	EGFP-monomer	nucleus	-	1	8.371	54.767	154.884	1.066	1.03937
191114	18	WT parental	EGFP-monomer	cytoplasm	-	1	8.942	60.803	171.954	1.056	0.727273
191114	20	WT parental	EGFP-dimer	nucleus	-	1	1.678	20.415	57.7347	1.087	1.37008
191114	20	WT parental	EGFP-dimer	cytoplasm	-	1	1.515	18.539	52.4293	1.091	1.18182
191114	21	WT parental	EGFP-monomer	nucleus	-	1	6.076	44	124.434	1.067	1.05512
191114	21	WT parental	EGFP-monomer	cytoplasm	-	1	4.407	35.554	100.549	1.094	1.22078
191114	21	WT parental	EGFP-monomer	nucleus	-	2	5.931	42.88	121.267	1.057	0.897638
191114	21	WT parental	EGFP-monomer	cytoplasm	-	2	4.051	32.912	93.0769	1.05	0.649351
191114	23	WT parental	EGFP-monomer	nucleus	-	1	1.483	16.636	47.0475	1.061	0.96063
191114	23	WT parental	EGFP-monomer	cytoplasm	-	1	1.597	20.941	59.2223	1.051	0.662338
191114	27	WT parental	EGFP-monomer	nucleus	-	1	20.603	94.502	267.257	1.06	0.944882
191114	27	WT parental	EGFP-monomer	cytoplasm	-	1	17.442	78.413	221.756	1.103	1.33766
191114	36	clone 2	SGFP2-CTNNB1_BSA	nucleus	BSA	1	1.214	14.518	41.0577	1.045	0.708661
191114	36	clone 2	SGFP2-CTNNB1_BSA	cytoplasm	BSA	1	2.455	27.644	78.1787	1.058	0.753247
191114	36	clone 2	SGFP2-CTNNB1_BSA	nucleus	BSA	2	0.906	14.15	40.017	1.023	0.362205
191114	36	clone 2	SGFP2-CTNNB1_BSA	cytoplasm	BSA	2	1.769	19.138	54.1233	1.064	0.831169
191114	36	clone 2	SGFP2-CTNNB1_BSA	nucleus	BSA	3	1.437	17.272	48.8462	1.037	0.582677
191114	36	clone 2	SGFP2-CTNNB1_BSA	cytoplasm	BSA	3	2.31	24.181	68.3852	1.034	0.441558
191114	37	clone 2	SGFP2-CTNNB1_BSA	nucleus	BSA	1	0.902	13.257	37.4915	1.038	0.598425
191114	37	clone 2	SGFP2-CTNNB1_BSA	cytoplasm	BSA	1	1.862	18.809	53.1929	1.064	0.831169
191114	37	clone 2	SGFP2-CTNNB1_BSA	nucleus	BSA	2	0.807	9.713	27.4689	1.046	0.724409
191114	37	clone 2	SGFP2-CTNNB1_BSA	cytoplasm	BSA	2	1.411	16.285	46.0549	1.067	0.87013
191114	38	clone 2	SGFP2-CTNNB1_BSA	nucleus	BSA	1	0.861	12.125	34.2902	1.043	0.677165
191114	38	clone 2	SGFP2-CTNNB1_BSA	cytoplasm	BSA	1	1.392	17.025	48.1476	1.04	0.519481
191114	38	clone 2	SGFP2-CTNNB1_BSA	nucleus	BSA	2	1.34	16.778	47.4491	1.044	0.692913
191114	38	clone 2	SGFP2-CTNNB1_BSA	cytoplasm	BSA	2	1.771	18.473	52.2426	1.078	1.01299
191114	38	clone 2	SGFP2-CTNNB1_BSA	nucleus	BSA	3	1.128	13.618	38.5124	1.046	0.724409
191114	38	clone 2	SGFP2-CTNNB1_BSA	cytoplasm	BSA	3	1.701	21.139	59.7822	1.051	0.662338
191114	39	clone 2	SGFP2-CTNNB1_BSA	nucleus	BSA	1	1.266	16.783	47.4632	1.063	0.992126
191114	39	clone 2	SGFP2-CTNNB1_BSA	cytoplasm	BSA	1	2.348	23.504	66.4706	1.052	0.675325
191114	39	clone 2	SGFP2-CTNNB1_BSA	nucleus	BSA	2	1.478	20.746	58.6708	1.03	0.472441
191114	39	clone 2	SGFP2-CTNNB1_BSA	cytoplasm	BSA	2	1.796	23.725	67.0956	1.027	0.350649
191114	39	clone 2	SGFP2-CTNNB1_BSA	nucleus	BSA	3	1.415	15.082	42.6527	1.069	1.08661
191114	39	clone 2	SGFP2-CTNNB1_BSA	cytoplasm	BSA	3	2.239	27.749	78.4757	1.047	0.61039
191114	39	clone 2	SGFP2-CTNNB1_BSA	nucleus	BSA	4	1.236	16.54	46.776	1.037	0.582677
191114	39	clone 2	SGFP2-CTNNB1_BSA	cytoplasm	BSA	4	2.314	24.465	69.1883	1.014	0.181818
191114	39	clone 2	SGFP2-CTNNB1_BSA	nucleus	BSA	5	1.058	16.247	45.9474	1.059	0.929134
191114	39	clone 2	SGFP2-CTNNB1_BSA	cytoplasm	BSA	5	1.554	15.113	42.7404	1.06	0.779221
191114	39	clone 2	SGFP2-CTNNB1_BSA	nucleus	BSA	6	1.241	15.265	43.1702	1.058	0.913386
191114	39	clone 2	SGFP2-CTNNB1_BSA	cytoplasm	BSA	6	1.866	20.137	56.9485	1.075	0.974026
191114	40	clone 2	SGFP2-CTNNB1_BSA	nucleus	BSA	1	0.766	10.96	30.9955	1.031	0.488189
191114	40	clone 2	SGFP2-CTNNB1_BSA	cytoplasm	BSA	1	1.368	17.222	48.7048	1.032	0.415584
191114	40	clone 2	SGFP2-CTNNB1_BSA	nucleus	BSA	2	0.703	9.127	25.8117	1.038	0.598425
191114	40	clone 2	SGFP2-CTNNB1_BSA	cytoplasm	BSA	2	1.208	15.489	43.8037	1.059	0.766234
191114	40	clone 2	SGFP2-CTNNB1_BSA	nucleus	BSA	3	1.393	15.631	44.2053	1.026	0.409449
191114	40	clone 2	SGFP2-CTNNB1_BSA	cytoplasm	BSA	3	1.414	12.89	36.4536	1.091	1.18182
191114	41	clone 2	SGFP2-CTNNB1_BSA	nucleus	BSA	1	0.772	10.876	30.7579	1.038	0.598425
191114	41	clone 2	SGFP2-CTNNB1_BSA	cytoplasm	BSA	1	1.465	14.714	41.612	1.072	0.935065
191114	41	clone 2	SGFP2-CTNNB1_BSA	nucleus	BSA	2	0.784	10.532	29.7851	1.037	0.582677
191114	41	clone 2	SGFP2-CTNNB1_BSA	cytoplasm	BSA	2	2.06	23.209	65.6363	1.06	0.779221
191114	41	clone 2	SGFP2-CTNNB1_BSA	nucleus	BSA	3	0.947	12.133	34.3128	1.047	0.740157
191114	41	clone 2	SGFP2-CTNNB1_BSA	cytoplasm	BSA	3	2.185	23.785	67.2653	1.029	0.376623
191114	42	clone 2	SGFP2-CTNNB1_BSA	nucleus	BSA	1	1.589	15.81	44.7115	1.08	1.25984
191114	42	clone 2	SGFP2-CTNNB1_BSA	cytoplasm	BSA	1	3.103	28.421	80.3761	1.072	0.935065
191114	42	clone 2	SGFP2-CTNNB1_BSA	nucleus	BSA	2	1.457	16.608	46.9683	1.064	1.00787
191114	42	clone 2	SGFP2-CTNNB1_BSA	cytoplasm	BSA	2	2.879	27.797	78.6114	1.034	0.441558
191114	42	clone 2	SGFP2-CTNNB1_BSA	nucleus	BSA	3	1.408	18.034	51.0011	1.051	0.80315
191114	42	clone 2	SGFP2-CTNNB1_BSA	cytoplasm	BSA	3	3.663	38.514	108.92	1.064	0.831169
191114	43	clone 2	SGFP2-CTNNB1_WNT3A	nucleus	WNT3A	1	1.589	15.81	44.7115	1.08	1.25984
191114	43	clone 2	SGFP2-CTNNB1_WNT3A	cytoplasm	WNT3A	1	3.103	28.421	80.3761	1.072	0.935065
191114	43	clone 2	SGFP2-CTNNB1_WNT3A	nucleus	WNT3A	2	1.457	16.608	46.9683	1.064	1.00787
191114	43	clone 2	SGFP2-CTNNB1_WNT3A	cytoplasm	WNT3A	2	2.879	27.797	78.6114	1.034	0.441558
191114	43	clone 2	SGFP2-CTNNB1_WNT3A	nucleus	WNT3A	3	1.408	18.034	51.0011	1.051	0.80315
191114	43	clone 2	SGFP2-CTNNB1_WNT3A	cytoplasm	WNT3A	3	3.663	38.514	108.92	1.064	0.831169
191114	44	clone 2	SGFP2-CTNNB1_WNT3A	nucleus	WNT3A	1	1.912	19.67	55.6278	1.055	0.866142
191114	44	clone 2	SGFP2-CTNNB1_WNT3A	cytoplasm	WNT3A	1	1.26	15.378	43.4898	1.046	0.597403
191114	44	clone 2	SGFP2-CTNNB1_WNT3A	nucleus	WNT3A	2	1.914	18.928	53.5294	1.067	1.05512
191114	44	clone 2	SGFP2-CTNNB1_WNT3A	cytoplasm	WNT3A	2	1.685	17.217	48.6906	1.05	0.649351
191114	45	clone 2	SGFP2-CTNNB1_WNT3A	nucleus	WNT3A	1	2.645	26.309	74.4033	1.063	0.992126
191114	45	clone 2	SGFP2-CTNNB1_WNT3A	cytoplasm	WNT3A	1	3.144	25.697	72.6725	1.096	1.24675
191114	45	clone 2	SGFP2-CTNNB1_WNT3A	nucleus	WNT3A	2	2.538	22.758	64.3609	1.06	0.944882
191114	45	clone 2	SGFP2-CTNNB1_WNT3A	cytoplasm	WNT3A	2	2.907	28.306	80.0509	1.075	0.974026
191114	45	clone 2	SGFP2-CTNNB1_WNT3A	nucleus	WNT3A	3	1.841	20.342	57.5283	1.048	0.755906
191114	45	clone 2	SGFP2-CTNNB1_WNT3A	cytoplasm	WNT3A	3	2.496	27.962	79.0781	1.052	0.675325
191114	45	clone 2	SGFP2-CTNNB1_WNT3A	nucleus	WNT3A	4	2.985	29.577	83.6454	1.039	0.614173
191114	45	clone 2	SGFP2-CTNNB1_WNT3A	cytoplasm	WNT3A	4	2.873	31.948	90.3507	1.034	0.441558
191114	46	clone 2	SGFP2-CTNNB1_WNT3A	nucleus	WNT3A	1	2.934	27.184	76.8778	1.054	0.850394
191114	46	clone 2	SGFP2-CTNNB1_WNT3A	cytoplasm	WNT3A	1	2.981	29.627	83.7868	1.051	0.662338
191114	46	clone 2	SGFP2-CTNNB1_WNT3A	nucleus	WNT3A	2	2.982	25.36	71.7195	1.048	0.755906
191114	46	clone 2	SGFP2-CTNNB1_WNT3A	cytoplasm	WNT3A	2	2.01	21.933	62.0277	1.072	0.935065
191114	46	clone 2	SGFP2-CTNNB1_WNT3A	nucleus	WNT3A	3	2.894	26.535	75.0424	1.05	0.787402
191114	46	clone 2	SGFP2-CTNNB1_WNT3A	cytoplasm	WNT3A	3	2.569	19.959	56.4451	1.066	0.857143
191114	47	clone 2	SGFP2-CTNNB1_WNT3A	nucleus	WNT3A	1	3.112	30.856	87.2624	1.044	0.692913
191114	47	clone 2	SGFP2-CTNNB1_WNT3A	cytoplasm	WNT3A	1	3.319	31.794	89.9152	1.059	0.766234
191114	47	clone 2	SGFP2-CTNNB1_WNT3A	nucleus	WNT3A	2	2.794	29.359	83.0288	1.04	0.629921
191114	47	clone 2	SGFP2-CTNNB1_WNT3A	cytoplasm	WNT3A	2	3.406	22.729	64.2788	1.121	1.57143
191114	47	clone 2	SGFP2-CTNNB1_WNT3A	nucleus	WNT3A	3	2.535	26.702	75.5147	1.061	0.96063
191114	47	clone 2	SGFP2-CTNNB1_WNT3A	cytoplasm	WNT3A	3	2.311	30.187	85.3705	1.052	0.675325
191114	47	clone 2	SGFP2-CTNNB1_WNT3A	nucleus	WNT3A	4	3.068	28.905	81.7449	1.049	0.771654
191114	47	clone 2	SGFP2-CTNNB1_WNT3A	cytoplasm	WNT3A	4	3.243	29.621	83.7698	1.05	0.649351
191114	47	clone 2	SGFP2-CTNNB1_WNT3A	nucleus	WNT3A	5	3.164	31.411	88.832	1.047	0.740157
191114	47	clone 2	SGFP2-CTNNB1_WNT3A	cytoplasm	WNT3A	5	4.21	33.234	93.9876	1.079	1.02597
191114	48	clone 2	SGFP2-CTNNB1_WNT3A	nucleus	WNT3A	1	2.224	23.05	65.1867	1.069	1.08661
191114	48	clone 2	SGFP2-CTNNB1_WNT3A	cytoplasm	WNT3A	1	2.235	23.463	66.3546	1.055	0.714286
191114	48	clone 2	SGFP2-CTNNB1_WNT3A	nucleus	WNT3A	2	2.554	23.622	66.8043	1.058	0.913386
191114	48	clone 2	SGFP2-CTNNB1_WNT3A	cytoplasm	WNT3A	2	2.325	24.453	69.1544	1.053	0.688312
191114	48	clone 2	SGFP2-CTNNB1_WNT3A	nucleus	WNT3A	3	2.789	26.485	74.901	1.06	0.944882
191114	48	clone 2	SGFP2-CTNNB1_WNT3A	cytoplasm	WNT3A	3	2.949	26.784	75.7466	1.085	1.1039
191114	48	clone 2	SGFP2-CTNNB1_WNT3A	nucleus	WNT3A	4	2.707	27.543	77.8931	1.058	0.913386
191114	48	clone 2	SGFP2-CTNNB1_WNT3A	cytoplasm	WNT3A	4	2.891	32.165	90.9644	1.104	1.35065
191114	48	clone 2	SGFP2-CTNNB1_WNT3A	nucleus	WNT3A	5	3.194	28.443	80.4383	1.071	1.11811
191114	48	clone 2	SGFP2-CTNNB1_WNT3A	cytoplasm	WNT3A	5	3.457	27.542	77.8903	1.059	0.766234
191115	4	WT parental	EGFP-monomer	cytoplasm	-	1	2.825	27.456	77.6471	1.071	0.986111
191115	4	WT parental	EGFP-monomer	nucleus	-	1	3.251	26.805	75.806	1.059	1.09259
191115	4	WT parental	EGFP-monomer	cytoplasm	-	2	19.571	85.738	242.472	1.128	1.77778
191115	4	WT parental	EGFP-monomer	nucleus	-	2	21.337	96.053	271.643	1.054	1
191115	5	WT parental	EGFP-dimer	cytoplasm	-	1	25.97	97.492	275.713	1.081	1.125
191115	5	WT parental	EGFP-dimer	nucleus	-	1	26.281	90.464	255.837	1.07	1.2963
191115	5	WT parental	EGFP-dimer	cytoplasm	-	2	6.54	40.842	115.503	1.107	1.48611
191115	5	WT parental	EGFP-dimer	nucleus	-	2	6.692	43.261	122.344	1.089	1.64815
191115	6	WT parental	EGFP-dimer	cytoplasm	-	1	2.793	20.983	59.3411	1.119	1.65278
191115	6	WT parental	EGFP-dimer	nucleus	-	1	3.538	32.039	90.608	1.091	1.68519
191115	7	WT parental	EGFP-dimer	cytoplasm	-	1	7.032	44.13	124.802	1.111	1.54167
191115	7	WT parental	EGFP-dimer	nucleus	-	1	7.019	45.524	128.744	1.093	1.72222
191115	8	WT parental	EGFP-dimer	cytoplasm	-	2	10.88	52.933	149.697	1.099	1.375
191115	8	WT parental	EGFP-dimer	nucleus	-	2	9.923	58.474	165.368	1.082	1.51852
191115	8	WT parental	EGFP-dimer	cytoplasm	-	1	1.093	12.694	35.8993	1.053	0.736111
191115	8	WT parental	EGFP-dimer	nucleus	-	1	3.073	28.68	81.1086	1.076	1.40741
191115	9	WT parental	EGFP-dimer	cytoplasm	-	1	2.636	25.218	71.3179	1.103	1.43056
191115	9	WT parental	EGFP-dimer	nucleus	-	1	3.15	27.301	77.2087	1.089	1.64815
191115	10	WT parental	EGFP-monomer	cytoplasm	-	1	7.419	52.62	148.812	1.057	0.791667
191115	10	WT parental	EGFP-monomer	nucleus	-	1	7.527	57.776	163.394	1.049	0.907407
191115	12	WT parental	EGFP-monomer	cytoplasm	-	1	13.757	62.923	177.95	1.13	1.80556
191115	12	WT parental	EGFP-monomer	nucleus	-	1	12.025	71.205	201.372	1.041	0.759259
191115	13	WT parental	EGFP-monomer	cytoplasm	-	1	5.032	39.22	110.916	1.072	1
191115	13	WT parental	EGFP-monomer	nucleus	-	1	5.394	41.457	117.243	1.065	1.2037
191115	20	clone 2	SGFP2-CTNNB1_BSA	nucleus	BSA	1	1.183	13.725	38.815	1.067	1.24074
191115	20	clone 2	SGFP2-CTNNB1_BSA	cytoplasm	BSA	1	2.457	26.49	74.9152	1.033	0.458333
191115	20	clone 2	SGFP2-CTNNB1_BSA	nucleus	BSA	2	1.751	17.686	50.017	1.066	1.22222
191115	20	clone 2	SGFP2-CTNNB1_BSA	cytoplasm	BSA	2	2.267	22.881	64.7087	1.072	1
191115	20	clone 2	SGFP2-CTNNB1_BSA	nucleus	BSA	3	1.781	19.622	55.4921	1.072	1.33333
191115	20	clone 2	SGFP2-CTNNB1_BSA	cytoplasm	BSA	3	2.586	24.916	70.4638	1.058	0.805556
191115	20	clone 2	SGFP2-CTNNB1_BSA	nucleus	BSA	4	2.272	20.248	57.2624	1.085	1.57407
191115	20	clone 2	SGFP2-CTNNB1_BSA	cytoplasm	BSA	4	1.881	14.563	41.185	1.082	1.13889
191115	20	clone 2	SGFP2-CTNNB1_BSA	nucleus	BSA	5	1.22	15.016	42.4661	1.056	1.03704
191115	20	clone 2	SGFP2-CTNNB1_BSA	cytoplasm	BSA	5	1.574	15.376	43.4842	1.052	0.722222
191115	20	clone 2	SGFP2-CTNNB1_BSA	nucleus	BSA	6	1.353	18.304	51.7647	1.055	1.01852
191115	20	clone 2	SGFP2-CTNNB1_BSA	cytoplasm	BSA	6	1.971	18.282	51.7025	1.1	1.38889
191115	20	clone 2	SGFP2-CTNNB1_BSA	nucleus	BSA	7	1.532	15.732	44.491	1.072	1.33333
191115	20	clone 2	SGFP2-CTNNB1_BSA	cytoplasm	BSA	7	1.434	17.829	50.4214	1.081	1.125
191115	20	clone 2	SGFP2-CTNNB1_BSA	nucleus	BSA	8	1.313	15.43	43.6369	1.088	1.62963
191115	20	clone 2	SGFP2-CTNNB1_BSA	cytoplasm	BSA	8	1.379	12.041	34.0526	1.096	1.33333
191115	20	clone 2	SGFP2-CTNNB1_BSA	nucleus	BSA	9	1.381	14.569	41.2019	1.036	0.666667
191115	20	clone 2	SGFP2-CTNNB1_BSA	cytoplasm	BSA	9	1.737	16.93	47.879	1.055	0.763889
191115	21	clone 2	SGFP2-CTNNB1_BSA	nucleus	BSA	1	1.35	15.38	43.4955	1.066	1.22222
191115	21	clone 2	SGFP2-CTNNB1_BSA	cytoplasm	BSA	1	0.875	12.109	34.2449	1.04	0.555556
191115	21	clone 2	SGFP2-CTNNB1_BSA	nucleus	BSA	2	1.337	17.061	48.2494	1.045	0.833333
191115	21	clone 2	SGFP2-CTNNB1_BSA	cytoplasm	BSA	2	1.589	17.683	50.0085	1.071	0.986111
191115	21	clone 2	SGFP2-CTNNB1_BSA	nucleus	BSA	3	0.964	17.006	48.0939	1.037	0.685185
191115	21	clone 2	SGFP2-CTNNB1_BSA	cytoplasm	BSA	3	1.54	18.23	51.5554	1.088	1.22222
191115	21	clone 2	SGFP2-CTNNB1_BSA	nucleus	BSA	4	1.282	14.881	42.0843	1.067	1.24074
191115	21	clone 2	SGFP2-CTNNB1_BSA	cytoplasm	BSA	4	1.023	11.79	33.3428	1.064	0.888889
191115	21	clone 2	SGFP2-CTNNB1_BSA	nucleus	BSA	5	1.14	15.461	43.7245	1.023	0.425926
191115	21	clone 2	SGFP2-CTNNB1_BSA	cytoplasm	BSA	5	1.47	17.756	50.2149	1.064	0.888889
191115	21	clone 2	SGFP2-CTNNB1_BSA	nucleus	BSA	6	1.24	16.581	46.892	1.046	0.851852
191115	21	clone 2	SGFP2-CTNNB1_BSA	cytoplasm	BSA	6	2.086	19.35	54.7229	1.099	1.375
191115	21	clone 2	SGFP2-CTNNB1_BSA	nucleus	BSA	7	1.353	15.396	43.5407	1.051	0.944444
191115	21	clone 2	SGFP2-CTNNB1_BSA	cytoplasm	BSA	7	1.07	15.072	42.6244	1.053	0.736111
191115	21	clone 2	SGFP2-CTNNB1_BSA	nucleus	BSA	8	0.914	12.031	34.0243	1.052	0.962963
191115	21	clone 2	SGFP2-CTNNB1_BSA	cytoplasm	BSA	8	1.457	15.003	42.4293	1.09	1.25
191115	22	clone 2	SGFP2-CTNNB1_BSA	nucleus	BSA	1	0.807	10.937	30.9304	1.046	0.851852
191115	22	clone 2	SGFP2-CTNNB1_BSA	cytoplasm	BSA	1	1.191	14.657	41.4508	1.06	0.833333
191115	22	clone 2	SGFP2-CTNNB1_BSA	nucleus	BSA	2	0.913	13.906	39.3269	1.04	0.740741
191115	22	clone 2	SGFP2-CTNNB1_BSA	cytoplasm	BSA	2	1.415	16.251	45.9587	1.062	0.861111
191115	22	clone 2	SGFP2-CTNNB1_BSA	nucleus	BSA	3	0.933	9.655	27.3049	1.083	1.53704
191115	22	clone 2	SGFP2-CTNNB1_BSA	cytoplasm	BSA	3	1.124	12.764	36.0973	1.054	0.75
191115	25	clone 2	SGFP2-CTNNB1_WNT3A	nucleus	WNT3A	1	2.79	26.095	73.7981	1.06	1.11111
191115	25	clone 2	SGFP2-CTNNB1_WNT3A	cytoplasm	WNT3A	1	2.504	23.825	67.3784	1.086	1.19444
191115	25	clone 2	SGFP2-CTNNB1_WNT3A	nucleus	WNT3A	2	3.868	33.911	95.9021	1.062	1.14815
191115	25	clone 2	SGFP2-CTNNB1_WNT3A	cytoplasm	WNT3A	2	3.583	34.012	96.1878	1.073	1.01389
191115	25	clone 2	SGFP2-CTNNB1_WNT3A	nucleus	WNT3A	3	3.654	32.478	91.8495	1.053	0.981481
191115	25	clone 2	SGFP2-CTNNB1_WNT3A	cytoplasm	WNT3A	3	3.35	28.521	80.6589	1.067	0.930556
191115	25	clone 2	SGFP2-CTNNB1_WNT3A	nucleus	WNT3A	4	3.816	31.71	89.6776	1.061	1.12963
191115	25	clone 2	SGFP2-CTNNB1_WNT3A	cytoplasm	WNT3A	4	3.271	26.097	73.8037	1.05	0.694444
191115	25	clone 2	SGFP2-CTNNB1_WNT3A	nucleus	WNT3A	5	3.23	29.476	83.3597	1.056	1.03704
191115	25	clone 2	SGFP2-CTNNB1_WNT3A	cytoplasm	WNT3A	5	3.525	31.793	89.9123	1.082	1.13889
191115	26	clone 2	SGFP2-CTNNB1_WNT3A	nucleus	WNT3A	1	4.196	36.254	102.528	1.072	1.33333
191115	26	clone 2	SGFP2-CTNNB1_WNT3A	cytoplasm	WNT3A	1	3.675	31.021	87.7291	1.09	1.25
191115	26	clone 2	SGFP2-CTNNB1_WNT3A	nucleus	WNT3A	2	3.858	33.229	93.9734	1.07	1.2963
191115	26	clone 2	SGFP2-CTNNB1_WNT3A	cytoplasm	WNT3A	2	3.511	30.994	87.6527	1.076	1.05556
191115	26	clone 2	SGFP2-CTNNB1_WNT3A	nucleus	WNT3A	3	4.034	35.419	100.167	1.065	1.2037
191115	26	clone 2	SGFP2-CTNNB1_WNT3A	cytoplasm	WNT3A	3	3.282	29.454	83.2975	1.084	1.16667
191115	26	clone 2	SGFP2-CTNNB1_WNT3A	nucleus	WNT3A	4	3.844	35.398	100.107	1.075	1.38889
191115	26	clone 2	SGFP2-CTNNB1_WNT3A	cytoplasm	WNT3A	4	3.619	31.258	88.3993	1.087	1.20833
191115	26	clone 2	SGFP2-CTNNB1_WNT3A	nucleus	WNT3A	5	3.815	32.834	92.8563	1.065	1.2037
191115	26	clone 2	SGFP2-CTNNB1_WNT3A	cytoplasm	WNT3A	5	3.255	29.377	83.0798	1.082	1.13889
191115	26	clone 2	SGFP2-CTNNB1_WNT3A	nucleus	WNT3A	6	4.515	39.203	110.868	1.055	1.01852
191115	26	clone 2	SGFP2-CTNNB1_WNT3A	cytoplasm	WNT3A	6	3.656	29.222	82.6414	1.076	1.05556
191115	27	clone 2	SGFP2-CTNNB1_WNT3A	nucleus	WNT3A	1	3.402	28.363	80.2121	1.065	1.2037
191115	27	clone 2	SGFP2-CTNNB1_WNT3A	cytoplasm	WNT3A	1	3.698	33.612	95.0566	1.069	0.958333
191115	27	clone 2	SGFP2-CTNNB1_WNT3A	nucleus	WNT3A	2	3.649	29.629	83.7924	1.07	1.2963
191115	27	clone 2	SGFP2-CTNNB1_WNT3A	cytoplasm	WNT3A	2	3.735	31.015	87.7121	1.08	1.11111
191115	27	clone 2	SGFP2-CTNNB1_WNT3A	nucleus	WNT3A	3	3.944	33.526	94.8133	1.049	0.907407
191115	27	clone 2	SGFP2-CTNNB1_WNT3A	cytoplasm	WNT3A	3	4.526	31.864	90.1131	1.099	1.375
191115	28	clone 2	SGFP2-CTNNB1_WNT3A	nucleus	WNT3A	1	4.565	36.777	104.007	1.077	1.42593
191115	28	clone 2	SGFP2-CTNNB1_WNT3A	cytoplasm	WNT3A	1	3.247	29.685	83.9508	1.084	1.16667
191115	28	clone 2	SGFP2-CTNNB1_WNT3A	nucleus	WNT3A	2	3.824	35.23	99.6324	1.069	1.27778
191115	28	clone 2	SGFP2-CTNNB1_WNT3A	cytoplasm	WNT3A	2	2.362	23.773	67.2313	1.067	0.930556
191115	28	clone 2	SGFP2-CTNNB1_WNT3A	nucleus	WNT3A	3	4.58	38.837	109.833	1.075	1.38889
191115	28	clone 2	SGFP2-CTNNB1_WNT3A	cytoplasm	WNT3A	3	2.888	26.572	75.1471	1.105	1.45833
191115	28	clone 2	SGFP2-CTNNB1_WNT3A	nucleus	WNT3A	4	4.545	36.833	104.166	1.068	1.25926
191115	28	clone 2	SGFP2-CTNNB1_WNT3A	cytoplasm	WNT3A	4	3.407	27.303	77.2144	1.097	1.34722
191115	28	clone 2	SGFP2-CTNNB1_WNT3A	nucleus	WNT3A	5	3.977	34.82	98.4729	1.062	1.14815
191115	28	clone 2	SGFP2-CTNNB1_WNT3A	cytoplasm	WNT3A	5	3.39	31.987	90.461	1.069	0.958333
191115	29	clone 2	SGFP2-CTNNB1_WNT3A	nucleus	WNT3A	1	4.612	36.829	104.154	1.064	1.18519
191115	29	clone 2	SGFP2-CTNNB1_WNT3A	cytoplasm	WNT3A	1	3.274	27.029	76.4395	1.115	1.59722
191115	29	clone 2	SGFP2-CTNNB1_WNT3A	nucleus	WNT3A	2	5.386	42.297	119.618	1.057	1.05556
191115	29	clone 2	SGFP2-CTNNB1_WNT3A	cytoplasm	WNT3A	2	3.656	26.124	73.8801	1.152	2.11111
191115	29	clone 2	SGFP2-CTNNB1_WNT3A	nucleus	WNT3A	3	4.587	36.566	103.411	1.072	1.33333
191115	29	clone 2	SGFP2-CTNNB1_WNT3A	cytoplasm	WNT3A	3	2.855	24.565	69.4712	1.073	1.01389
191115	29	clone 2	SGFP2-CTNNB1_WNT3A	nucleus	WNT3A	4	2.513	25.895	73.2325	1.049	0.907407
191115	29	clone 2	SGFP2-CTNNB1_WNT3A	cytoplasm	WNT3A	4	2.898	24.319	68.7755	1.112	1.55556
191115	29	clone 2	SGFP2-CTNNB1_WNT3A	nucleus	WNT3A	5	3.803	31.62	89.4231	1.062	1.14815
191115	29	clone 2	SGFP2-CTNNB1_WNT3A	cytoplasm	WNT3A	5	3.122	27.468	77.681	1.076	1.05556
191115	30	clone 2	SGFP2-CTNNB1_BSA	nucleus	BSA	1	0.986	13.468	38.0882	1.052	0.962963
191115	30	clone 2	SGFP2-CTNNB1_BSA	cytoplasm	BSA	1	1.521	17.285	48.8829	1.075	1.04167
191115	30	clone 2	SGFP2-CTNNB1_BSA	nucleus	BSA	2	0.961	12.338	34.8925	1.047	0.87037
191115	30	clone 2	SGFP2-CTNNB1_BSA	cytoplasm	BSA	2	1.308	15.464	43.733	1.061	0.847222
191115	30	clone 2	SGFP2-CTNNB1_BSA	nucleus	BSA	3	0.787	9.779	27.6555	1.062	1.14815
191115	30	clone 2	SGFP2-CTNNB1_BSA	cytoplasm	BSA	3	1.103	12.651	35.7777	1.08	1.11111
191115	30	clone 2	SGFP2-CTNNB1_BSA	nucleus	BSA	4	1.006	11.702	33.0939	1.072	1.33333
191115	30	clone 2	SGFP2-CTNNB1_BSA	cytoplasm	BSA	4	1.289	13.014	36.8043	1.132	1.83333
191115	30	clone 2	SGFP2-CTNNB1_BSA	nucleus	BSA	5	1.115	14.26	40.3281	1.059	1.09259
191115	30	clone 2	SGFP2-CTNNB1_BSA	cytoplasm	BSA	5	1.417	14.293	40.4214	1.089	1.23611
191115	30	clone 2	SGFP2-CTNNB1_BSA	nucleus	BSA	6	0.833	10.101	28.5662	1.074	1.37037
191115	30	clone 2	SGFP2-CTNNB1_BSA	cytoplasm	BSA	6	1.251	13.829	39.1092	1.08	1.11111
191115	30	clone 2	SGFP2-CTNNB1_BSA	nucleus	BSA	7	0.925	11.477	32.4576	1.07	1.2963
191115	30	clone 2	SGFP2-CTNNB1_BSA	cytoplasm	BSA	7	1.41	13.284	37.5679	1.087	1.20833
191115	30	clone 2	SGFP2-CTNNB1_BSA	nucleus	BSA	8	0.74	11.017	31.1567	1.062	1.14815
191115	30	clone 2	SGFP2-CTNNB1_BSA	cytoplasm	BSA	8	1.385	18.083	51.1397	1.075	1.04167
191115	31	clone 2	SGFP2-CTNNB1_BSA	nucleus	BSA	1	1.103	12.409	35.0933	1.057	1.05556
191115	31	clone 2	SGFP2-CTNNB1_BSA	cytoplasm	BSA	1	1.11	13.751	38.8886	1.071	0.986111
191115	31	clone 2	SGFP2-CTNNB1_BSA	nucleus	BSA	2	0.958	12.821	36.2585	1.042	0.777778
191115	31	clone 2	SGFP2-CTNNB1_BSA	cytoplasm	BSA	2	1.569	19.041	53.849	1.056	0.777778
191115	31	clone 2	SGFP2-CTNNB1_BSA	nucleus	BSA	3	1.596	14.081	39.8218	1.106	1.96296
191115	31	clone 2	SGFP2-CTNNB1_BSA	cytoplasm	BSA	3	1.554	15.743	44.5221	1.084	1.16667
191115	31	clone 2	SGFP2-CTNNB1_BSA	nucleus	BSA	4	1.259	14.036	39.6946	1.078	1.44444
191115	31	clone 2	SGFP2-CTNNB1_BSA	cytoplasm	BSA	4	0.809	10.161	28.7359	1.046	0.638889
191115	31	clone 2	SGFP2-CTNNB1_BSA	nucleus	BSA	5	1.793	17.768	50.2489	1.073	1.35185
191115	31	clone 2	SGFP2-CTNNB1_BSA	cytoplasm	BSA	5	2.478	22.556	63.7896	1.099	1.375
191115	31	clone 2	SGFP2-CTNNB1_BSA	nucleus	BSA	6	0.813	11.131	31.4791	1.039	0.722222
191115	31	clone 2	SGFP2-CTNNB1_BSA	cytoplasm	BSA	6	1.568	19.782	55.9446	1.078	1.08333
191115	31	clone 2	SGFP2-CTNNB1_BSA	nucleus	BSA	7	1.146	15.141	42.8196	1.029	0.537037
191115	31	clone 2	SGFP2-CTNNB1_BSA	cytoplasm	BSA	7	2.184	22.614	63.9536	1.078	1.08333
191115	31	clone 2	SGFP2-CTNNB1_BSA	nucleus	BSA	8	1.124	16.164	45.7127	1.046	0.851852
191115	31	clone 2	SGFP2-CTNNB1_BSA	cytoplasm	BSA	8	1.517	14.697	41.5639	1.069	0.958333
191115	31	clone 2	SGFP2-CTNNB1_BSA	nucleus	BSA	9	1.054	15.018	42.4717	1.028	0.518519
191115	31	clone 2	SGFP2-CTNNB1_BSA	cytoplasm	BSA	9	1.799	19.306	54.5984	1.073	1.01389
191115	32	clone 2	SGFP2-CTNNB1_BSA	nucleus	BSA	1	0.833	12.033	34.03	1.049	0.907407
191115	32	clone 2	SGFP2-CTNNB1_BSA	cytoplasm	BSA	1	1.21	14.567	41.1963	1.057	0.791667
191115	32	clone 2	SGFP2-CTNNB1_BSA	nucleus	BSA	2	1.114	14.972	42.3416	1.035	0.648148
191115	32	clone 2	SGFP2-CTNNB1_BSA	cytoplasm	BSA	2	2.033	20.181	57.073	1.105	1.45833
191115	32	clone 2	SGFP2-CTNNB1_BSA	nucleus	BSA	3	0.797	10.83	30.6278	1.043	0.796296
191115	32	clone 2	SGFP2-CTNNB1_BSA	cytoplasm	BSA	3	1.425	16.997	48.0684	1.066	0.916667
191115	32	clone 2	SGFP2-CTNNB1_BSA	nucleus	BSA	4	0.98	11.793	33.3512	1.047	0.87037
191115	32	clone 2	SGFP2-CTNNB1_BSA	cytoplasm	BSA	4	1.752	20.256	57.2851	1.035	0.486111
191115	32	clone 2	SGFP2-CTNNB1_BSA	nucleus	BSA	5	1.076	16.244	45.9389	1.042	0.777778
191115	32	clone 2	SGFP2-CTNNB1_BSA	cytoplasm	BSA	5	1.947	19.083	53.9678	1.068	0.944444
191115	32	clone 2	SGFP2-CTNNB1_BSA	nucleus	BSA	6	1.139	15.526	43.9084	1.029	0.537037
191115	32	clone 2	SGFP2-CTNNB1_BSA	cytoplasm	BSA	6	1.806	16.853	47.6612	1.09	1.25
191115	33	clone 2	SGFP2-CTNNB1_BSA	nucleus	BSA	1	1.294	16.817	47.5594	1.039	0.722222
191115	33	clone 2	SGFP2-CTNNB1_BSA	cytoplasm	BSA	1	2.632	25.839	73.0741	1.081	1.125
191115	33	clone 2	SGFP2-CTNNB1_BSA	nucleus	BSA	2	1.298	13.701	38.7472	1.05	0.925926
191115	33	clone 2	SGFP2-CTNNB1_BSA	cytoplasm	BSA	2	2.048	17.475	49.4202	1.14	1.94444
191115	33	clone 2	SGFP2-CTNNB1_BSA	nucleus	BSA	3	0.981	13.968	39.5023	1.048	0.888889
191115	33	clone 2	SGFP2-CTNNB1_BSA	cytoplasm	BSA	3	2.435	21.231	60.0424	1.086	1.19444
191115	55	WT parental	EGFP-dimer	cytoplasm	-	1	5.607	42.582	120.424	1.098	1.36111
191115	55	WT parental	EGFP-dimer	nucleus	-	1	5.69	43.426	122.811	1.11	2.03704
191115	56	WT parental	SGFP2-monomer	cytoplasm	-	1	1.754	20.906	59.1233	1.072	1
191115	56	WT parental	SGFP2-monomer	nucleus	-	1	2.057	25.186	71.2274	1.061	1.12963
191115	57	WT parental	SGFP2-monomer	cytoplasm	-	1	5.087	44.503	125.857	1.084	1.16667
191115	57	WT parental	SGFP2-monomer	nucleus	-	1	8.701	59.58	168.495	1.045	0.833333
191115	59	WT parental	SGFP2-monomer	cytoplasm	-	1	5.071	39.072	110.498	1.07	0.972222
191115	59	WT parental	SGFP2-monomer	nucleus	-	1	5.733	45.995	130.076	1.042	0.777778
191115	59	WT parental	SGFP2-monomer	cytoplasm	-	2	9.255	60.173	170.173	1.053	0.736111
191115	59	WT parental	SGFP2-monomer	nucleus	-	2	10.263	67.657	191.338	1.032	0.592593
191115	60	WT parental	SGFP2-monomer	cytoplasm	-	1	6.127	49.118	138.908	1.054	0.75
191115	60	WT parental	SGFP2-monomer	nucleus	-	1	6.674	49.105	138.872	1.044	0.814815
