# Supplementary material for: Quantitative live-cell imaging and computational modeling shed new light on endogenous WNT/CTNNB1 signaling dynamics
Source: eLife. 2021 Jun 30;10:e66440. doi: 10.7554/eLife.66440 (PMC8341982; doi:10.7554/eLife.66440)
Supplement: Source data 1. [file elife-66440-data1.xlsx]

## Sheet: Fig 3B,C,D, Fig 8 supp 1B,C,D
Treatment	time (hour)	number of cells (for this timepoint and treatment)	normalized cytoplasmic intensity (mean)	normalized nuclear intensity (mean)	nuclear cytoplasmic ratio (mean)	normalized cytoplasmic intensity (lower boundry 95%CI)	normalized nuclear intensity (lower boundry 95%CI)	nuclear cytoplasmic ratio (lower boundry 95%CI)	normalized cytoplasmic intensity (upper boundry 95%CI)	normalized nuclear intensity (upper boundry 95%CI)	nuclear cytoplasmic ratio (upperboundry 95%CI)
BSA	-0.583333	261	1.01467	0.975652	0.757878	0.975193	0.90996	0.575261	1.05416	1.04134	0.940494
BSA	-0.5	270	1.02229	1.03361	0.671889	0.984361	0.948759	0.585944	1.06022	1.11846	0.757834
BSA	-0.416667	274	0.984124	1.01788	0.722236	0.944904	0.948896	0.614774	1.02335	1.08686	0.829699
BSA	-0.333333	275	0.986797	0.97886	0.767574	0.943606	0.909483	0.613807	1.02999	1.04824	0.921341
BSA	-0.25	283	0.967392	0.975748	0.775285	0.920332	0.91415	0.642783	1.01445	1.03735	0.907787
BSA	-0.166667	273	1.0332	0.999461	0.711666	0.977156	0.934747	0.583577	1.08924	1.06417	0.839755
BSA	-0.0833333	159	0.989295	1.03274	0.812488	0.926954	0.953766	0.660271	1.05164	1.11172	0.964705
BSA	0	274	1.08847	0.983314	0.596027	1.03183	0.923552	0.529679	1.14511	1.04308	0.662375
BSA	0.0833333	275	1.05033	0.997376	0.621428	1.00652	0.929473	0.551142	1.09413	1.06528	0.691713
BSA	0.166667	271	1.00182	0.981187	0.744899	0.959816	0.917489	0.588407	1.04383	1.04488	0.901391
BSA	0.25	283	1.0493	1.0153	0.686706	0.998023	0.950367	0.593233	1.10058	1.08023	0.780178
BSA	0.333333	275	1.05139	1.05242	0.673361	0.994262	0.981817	0.597331	1.10852	1.12302	0.749392
BSA	0.416667	272	1.04307	1.00977	0.639813	0.995339	0.937646	0.570829	1.0908	1.08189	0.708796
BSA	0.5	271	1.02632	0.987074	0.661835	0.975145	0.922863	0.586348	1.07749	1.05129	0.737322
BSA	0.583333	270	1.0656	0.991925	0.606503	1.01341	0.928897	0.553195	1.11778	1.05495	0.65981
BSA	0.666667	279	1.0198	1.00703	0.664137	0.96982	0.944067	0.593922	1.06977	1.07	0.734351
BSA	0.75	271	1.00145	0.983247	0.763267	0.952158	0.925758	0.605712	1.05074	1.04074	0.920823
BSA	0.833333	273	1.06166	0.973995	0.725584	1.0094	0.915975	0.570698	1.11391	1.03201	0.88047
BSA	0.916667	278	1.02354	0.966846	0.741025	0.974054	0.910622	0.588487	1.07303	1.02307	0.893563
BSA	1	286	1.08601	1.00153	0.633829	1.03629	0.93874	0.56419	1.13573	1.06432	0.703467
BSA	1.08333	276	1.08185	0.986537	0.608671	1.03117	0.923258	0.544956	1.13254	1.04982	0.672386
BSA	1.16667	279	1.07426	1.01846	0.663898	1.0276	0.952217	0.56527	1.12093	1.08469	0.762526
BSA	1.25	285	1.00329	1.00979	0.732079	0.956299	0.944129	0.617309	1.05027	1.07545	0.846849
BSA	1.33333	271	1.05986	1.00801	0.620242	1.01487	0.935986	0.551682	1.10485	1.08003	0.688803
BSA	1.41667	283	1.06375	1.0488	0.641522	1.01136	0.975273	0.582016	1.11614	1.12233	0.701028
BSA	1.5	274	1.05009	1.03156	0.648276	1.00416	0.953626	0.581835	1.09601	1.10949	0.714717
BSA	1.58333	273	1.0461	1.05834	0.674538	1.00259	0.966057	0.584854	1.08961	1.15061	0.764222
BSA	1.66667	284	1.1158	1.05004	0.616769	1.06041	0.978305	0.563977	1.1712	1.12177	0.669561
BSA	1.75	281	1.00012	1.01011	0.736853	0.950783	0.94236	0.629047	1.04945	1.07785	0.844659
BSA	1.83333	293	1.08251	1.05331	0.724645	1.02817	0.981927	0.611953	1.13685	1.1247	0.837337
BSA	1.91667	283	1.07767	1.02457	0.661769	1.02729	0.957683	0.582577	1.12805	1.09146	0.740961
BSA	2	286	1.06993	1.03453	0.707754	1.01418	0.962916	0.617747	1.12569	1.10615	0.797761
BSA	2.08333	284	1.04829	1.01714	0.68074	0.998013	0.951532	0.589179	1.09856	1.08276	0.772301
BSA	2.16667	284	1.06009	1.04909	0.64752	1.01183	0.977383	0.584479	1.10834	1.12079	0.710562
BSA	2.25	282	1.02225	1.01681	0.659327	0.97722	0.948555	0.597619	1.06727	1.08507	0.721035
BSA	2.33333	270	1.06452	0.970655	0.606346	1.01559	0.901478	0.546946	1.11345	1.03983	0.665746
BSA	2.41667	284	1.07261	0.980741	0.628653	1.01994	0.912811	0.549445	1.12528	1.04867	0.70786
BSA	2.5	283	0.9444	1.01857	0.74952	0.905194	0.943963	0.654373	0.983605	1.09317	0.844667
BSA	2.58333	284	1.04304	1.00852	0.698499	1.00009	0.924104	0.584263	1.08598	1.09293	0.812735
BSA	2.66667	293	1.01184	1.01087	0.689029	0.970431	0.928812	0.580607	1.05324	1.09292	0.79745
BSA	2.75	290	0.910972	0.99258	0.829963	0.871173	0.912981	0.683254	0.950772	1.07218	0.976672
BSA	2.83333	292	0.966344	0.998475	0.794214	0.924347	0.916251	0.657061	1.00834	1.0807	0.931367
BSA	2.91667	296	0.940584	1.0038	0.758618	0.902416	0.922194	0.64049	0.978753	1.08541	0.876746
BSA	3	295	0.98401	0.968668	0.710579	0.942602	0.898097	0.608451	1.02542	1.03924	0.812707
BSA	3.08333	304	0.951754	0.963069	0.746734	0.908547	0.886343	0.622155	0.994961	1.0398	0.871313
BSA	3.16667	300	0.973563	0.954003	0.645374	0.931861	0.885342	0.570443	1.01526	1.02266	0.720306
BSA	3.25	289	1.01957	0.930143	0.694215	0.963394	0.856363	0.54976	1.07574	1.00392	0.83867
BSA	3.33333	292	1.01178	0.932308	0.701075	0.966253	0.868806	0.582252	1.0573	0.995809	0.819898
BSA	3.41667	298	0.999267	0.94803	0.692271	0.954439	0.87484	0.588132	1.0441	1.02122	0.79641
BSA	3.5	289	0.942944	0.949843	0.674567	0.903751	0.87609	0.584952	0.982136	1.0236	0.764182
BSA	3.58333	296	0.944792	0.932896	0.740869	0.899743	0.871021	0.590522	0.989841	0.994771	0.891215
BSA	3.66667	299	1.00658	0.978443	0.692093	0.947673	0.896863	0.575309	1.06549	1.06002	0.808877
BSA	3.75	301	0.949561	0.961131	0.742186	0.908877	0.885596	0.598161	0.990245	1.03667	0.886211
BSA	3.83333	310	0.954216	0.996076	0.767133	0.914293	0.921391	0.620056	0.994138	1.07076	0.91421
BSA	3.91667	313	0.95212	0.981063	0.718587	0.909056	0.913454	0.608307	0.995184	1.04867	0.828867
BSA	4	309	0.999089	0.971394	0.718035	0.952497	0.904957	0.608967	1.04568	1.03783	0.827103
BSA	4.08333	308	0.949786	0.963269	0.76404	0.908911	0.894758	0.624764	0.990661	1.03178	0.903316
BSA	4.16667	305	0.983456	0.922144	0.705376	0.944701	0.863739	0.589899	1.02221	0.980548	0.820854
BSA	4.25	299	0.984479	0.941015	0.654335	0.945975	0.880883	0.573993	1.02298	1.00115	0.734676
BSA	4.33333	309	0.949808	0.923471	0.704568	0.91327	0.865567	0.594642	0.986345	0.981375	0.814494
BSA	4.41667	301	0.958874	0.940107	0.703102	0.920259	0.877963	0.604853	0.99749	1.00225	0.80135
BSA	4.5	310	0.986887	0.933912	0.632394	0.94984	0.874105	0.565398	1.02393	0.993719	0.699389
BSA	4.58333	304	0.951654	0.91788	0.65174	0.912943	0.857441	0.584424	0.990365	0.97832	0.719056
BSA	4.66667	297	0.988128	0.913489	0.611714	0.952949	0.854497	0.548434	1.02331	0.972481	0.674993
BSA	4.75	304	0.939559	0.931346	0.666315	0.904102	0.87191	0.594966	0.975016	0.990782	0.737665
BSA	4.83333	306	0.950099	0.921082	0.708785	0.904668	0.861115	0.592225	0.99553	0.981049	0.825345
BSA	4.91667	301	0.943652	0.931505	0.635037	0.909855	0.867453	0.576924	0.977449	0.995556	0.69315
BSA	5	304	0.966465	0.924664	0.683613	0.929165	0.860531	0.578126	1.00377	0.988798	0.789101
BSA	5.08333	309	0.981305	0.938954	0.700946	0.937878	0.871662	0.583277	1.02473	1.00625	0.818614
BSA	5.16667	301	0.951024	0.881481	0.731783	0.90488	0.827696	0.598806	0.997169	0.935266	0.864761
BSA	5.25	307	0.97523	0.890305	0.661143	0.928597	0.831454	0.563299	1.02186	0.949157	0.758987
BSA	5.33333	311	0.914522	0.907984	0.788267	0.877289	0.851339	0.645168	0.951756	0.964629	0.931365
BSA	5.41667	314	0.892712	0.928146	0.808228	0.854733	0.863586	0.662804	0.930691	0.992707	0.953652
BSA	5.5	310	0.889758	0.911406	0.692881	0.85741	0.850132	0.608983	0.922106	0.972679	0.77678
BSA	5.58333	313	0.936716	0.935971	0.687284	0.888577	0.872631	0.608896	0.984854	0.999311	0.765671
BSA	5.66667	315	0.906919	0.90182	0.735947	0.870792	0.841508	0.628097	0.943047	0.962132	0.843798
BSA	5.75	318	0.979155	0.905213	0.644895	0.942187	0.845916	0.561251	1.01612	0.96451	0.72854
BSA	5.83333	315	0.886896	0.913953	0.684664	0.856231	0.849044	0.603986	0.917561	0.978862	0.765342
BSA	5.91667	304	0.977638	0.875428	0.599298	0.933861	0.816516	0.539884	1.02141	0.934341	0.658712
BSA	6	312	0.868466	0.891186	0.721982	0.836559	0.828845	0.625168	0.900374	0.953527	0.818797
BSA	6.08333	313	0.964421	0.898502	0.641616	0.920431	0.833173	0.568162	1.00841	0.96383	0.715069
BSA	6.16667	311	0.979223	0.883734	0.652782	0.937686	0.82247	0.568583	1.02076	0.944997	0.73698
BSA	6.25	305	0.913642	0.869471	0.639248	0.878508	0.813335	0.570935	0.948775	0.925606	0.707561
BSA	6.33333	299	0.954733	0.867982	0.620072	0.913047	0.808416	0.554676	0.99642	0.927549	0.685467
BSA	6.41667	308	0.974191	0.882583	0.667008	0.930983	0.824766	0.585162	1.0174	0.940399	0.748855
BSA	6.5	308	0.940574	0.900506	0.718472	0.895977	0.83265	0.610089	0.985171	0.968362	0.826856
BSA	6.58333	301	0.90427	0.869745	0.641062	0.867422	0.809105	0.577421	0.941119	0.930385	0.704703
BSA	6.66667	296	0.935856	0.863609	0.62337	0.9002	0.809285	0.562298	0.971512	0.917934	0.684443
BSA	6.75	301	0.921561	0.853446	0.609303	0.883725	0.790942	0.554375	0.959397	0.915949	0.664232
BSA	6.83333	295	0.895669	0.838219	0.663265	0.861392	0.776239	0.561927	0.929946	0.900199	0.764603
BSA	6.91667	294	0.952593	0.83798	0.591059	0.912481	0.785402	0.529756	0.992706	0.890558	0.652361
BSA	7	291	0.878947	0.827305	0.651622	0.843055	0.771693	0.571188	0.914839	0.882916	0.732055
BSA	7.08333	294	0.966785	0.857548	0.579954	0.929349	0.803365	0.528693	1.00422	0.91173	0.631214
BSA	7.16667	291	0.943037	0.849585	0.620629	0.897777	0.783635	0.555463	0.988296	0.915534	0.685794
BSA	7.25	291	0.947242	0.825861	0.620083	0.903367	0.774088	0.525763	0.991116	0.877634	0.714402
BSA	7.33333	294	0.909839	0.813388	0.59797	0.875219	0.760974	0.526267	0.944458	0.865803	0.669674
BSA	7.41667	298	0.836992	0.827906	0.729226	0.801893	0.765568	0.620747	0.87209	0.890244	0.837706
BSA	7.5	287	0.858693	0.803973	0.722623	0.818617	0.749607	0.601433	0.898768	0.85834	0.843814
BSA	7.58333	293	0.882954	0.825627	0.696776	0.842706	0.770563	0.594407	0.923202	0.880691	0.799145
BSA	7.66667	298	0.937228	0.810879	0.612731	0.894397	0.760183	0.541839	0.980059	0.861574	0.683622
BSA	7.75	306	0.883324	0.806283	0.68432	0.842745	0.757101	0.563107	0.923902	0.855464	0.805533
BSA	7.83333	303	0.921634	0.832724	0.644189	0.871856	0.778016	0.577098	0.971412	0.887432	0.71128
BSA	7.91667	299	0.934006	0.836036	0.716506	0.885834	0.777509	0.591427	0.982179	0.894563	0.841585
BSA	8	293	0.918412	0.795543	0.616094	0.866009	0.747344	0.540407	0.970815	0.843741	0.69178
BSA	8.08333	303	0.822009	0.803375	0.681295	0.789931	0.754703	0.591867	0.854087	0.852047	0.770723
BSA	8.16667	304	0.894932	0.805307	0.620884	0.854986	0.755868	0.56088	0.934877	0.854746	0.680887
BSA	8.25	302	0.849806	0.792164	0.65072	0.812202	0.743637	0.584002	0.88741	0.840691	0.717438
BSA	8.33333	293	0.790596	0.791337	0.729651	0.757171	0.745022	0.630035	0.824021	0.837651	0.829268
BSA	8.41667	303	0.888617	0.78539	0.654498	0.851278	0.740623	0.577349	0.925956	0.830156	0.731646
BSA	8.5	300	0.899593	0.793434	0.620525	0.862948	0.741236	0.543852	0.936238	0.845633	0.697197
BSA	8.58333	298	0.819985	0.789922	0.648658	0.786966	0.730414	0.575491	0.853004	0.84943	0.721826
BSA	8.66667	297	0.896887	0.782382	0.577543	0.857624	0.721276	0.5224	0.93615	0.843489	0.632686
BSA	8.75	292	0.917085	0.780511	0.566237	0.878757	0.730447	0.516931	0.955413	0.830575	0.615542
BSA	8.83333	298	0.834594	0.768599	0.622258	0.800553	0.72334	0.564208	0.868636	0.813857	0.680309
BSA	8.91667	296	0.94325	0.776359	0.592193	0.881824	0.731503	0.532881	1.00468	0.821216	0.651506
BSA	9	287	0.901677	0.776182	0.625427	0.858347	0.726462	0.554245	0.945007	0.825902	0.696609
BSA	9.08333	290	0.847638	0.77936	0.648698	0.813308	0.725435	0.581205	0.881967	0.833285	0.71619
BSA	9.16667	298	0.891134	0.786831	0.591388	0.855495	0.731839	0.539117	0.926773	0.841824	0.643659
BSA	9.25	298	0.866104	0.780326	0.619603	0.829325	0.728245	0.558647	0.902882	0.832407	0.680559
BSA	9.33333	301	0.887011	0.780382	0.612304	0.847981	0.728546	0.549012	0.926042	0.832217	0.675596
BSA	9.41667	299	0.864435	0.790943	0.655529	0.828734	0.73861	0.57817	0.900136	0.843276	0.732888
BSA	9.5	294	0.82596	0.761962	0.63754	0.793881	0.715158	0.565118	0.85804	0.808765	0.709962
BSA	9.58333	286	0.819846	0.747976	0.602351	0.792785	0.701553	0.537904	0.846908	0.794399	0.666799
BSA	9.66667	286	0.789968	0.760528	0.644225	0.762909	0.709787	0.576763	0.817027	0.811268	0.711686
BSA	9.75	286	0.884144	0.732413	0.582577	0.847452	0.682128	0.517944	0.920837	0.782699	0.647209
BSA	9.83333	290	0.820549	0.717784	0.598502	0.78941	0.672234	0.534203	0.851688	0.763334	0.662801
BSA	9.91667	297	0.773919	0.74379	0.655055	0.746129	0.692045	0.589929	0.801709	0.795534	0.72018
BSA	10	298	0.798876	0.761765	0.686053	0.767826	0.713946	0.603406	0.829925	0.809584	0.7687
BSA	10.0833	295	0.890463	0.758221	0.580885	0.855944	0.707776	0.524425	0.924982	0.808665	0.637345
BSA	10.1667	291	0.879808	0.766774	0.576779	0.845372	0.714119	0.524635	0.914244	0.819428	0.628924
BSA	10.25	303	0.862393	0.758411	0.607709	0.825075	0.711906	0.552906	0.89971	0.804916	0.662513
BSA	10.3333	297	0.832474	0.730748	0.628651	0.796845	0.688255	0.562102	0.868104	0.77324	0.695199
BSA	10.4167	284	0.851457	0.724978	0.616508	0.812299	0.682758	0.545561	0.890616	0.767199	0.687455
BSA	10.5	291	0.940503	0.745487	0.52144	0.89755	0.693631	0.478484	0.983456	0.797343	0.564395
BSA	10.5833	296	0.927721	0.760813	0.567318	0.884321	0.706159	0.512374	0.971121	0.815466	0.622261
BSA	10.6667	298	0.846614	0.752228	0.638884	0.807852	0.703926	0.576342	0.885376	0.80053	0.701427
BSA	10.75	293	0.822534	0.735859	0.590606	0.788406	0.690513	0.546167	0.856662	0.781204	0.635045
BSA	10.8333	300	0.838564	0.750534	0.648144	0.800294	0.700765	0.573012	0.876835	0.800302	0.723277
BSA	10.9167	294	0.84959	0.750184	0.595307	0.795079	0.699104	0.543167	0.904102	0.801265	0.647446
BSA	11	293	0.839915	0.779505	0.632967	0.802317	0.724135	0.56561	0.877512	0.834874	0.700324
BSA	11.0833	298	0.898783	0.770368	0.589114	0.849478	0.717997	0.53505	0.948088	0.822739	0.643178
BSA	11.1667	301	0.818225	0.774187	0.624841	0.780614	0.721479	0.569812	0.855835	0.826894	0.679869
BSA	11.25	299	0.947435	0.772788	0.545889	0.90571	0.719942	0.500488	0.98916	0.825634	0.591289
BSA	11.3333	300	0.818431	0.78347	0.630487	0.7808	0.726474	0.573826	0.856062	0.840466	0.687148
BSA	11.4167	301	0.917178	0.798462	0.602327	0.87454	0.741441	0.544217	0.959817	0.855483	0.660437
BSA	11.5	304	0.877231	0.781705	0.588156	0.832568	0.719013	0.532223	0.921893	0.844397	0.644089
BSA	11.5833	306	0.799931	0.75299	0.632817	0.767566	0.70163	0.566953	0.832295	0.804351	0.698681
BSA	11.6667	305	0.896032	0.770804	0.589191	0.852938	0.71146	0.522547	0.939127	0.830148	0.655835
BSA	11.75	299	0.764548	0.763578	0.659583	0.733307	0.701608	0.582045	0.795789	0.825548	0.737122
BSA	11.8333	292	0.826308	0.774466	0.669628	0.788748	0.709298	0.566695	0.863869	0.839635	0.772561
BSA	11.9167	286	0.862984	0.744832	0.595136	0.824417	0.686549	0.532596	0.901551	0.803116	0.657675
BSA	12	301	0.838954	0.776478	0.614603	0.801777	0.714841	0.559837	0.876132	0.838115	0.669368
WNT25	-0.583333	300	1.03169	0.948487	0.590008	0.989437	0.89182	0.528345	1.07393	1.00515	0.651671
WNT25	-0.5	305	0.972228	0.984808	0.65218	0.932667	0.92229	0.588956	1.01179	1.04733	0.715403
WNT25	-0.416667	313	0.990997	1.02647	0.748251	0.928045	0.942781	0.579177	1.05395	1.11016	0.917324
WNT25	-0.333333	308	1.02478	1.01588	0.678805	0.929914	0.943269	0.596436	1.11965	1.08849	0.761174
WNT25	-0.25	306	1.01373	1.03155	0.654083	0.964459	0.954176	0.594851	1.06299	1.10892	0.713315
WNT25	-0.166667	316	0.997562	0.998074	0.695652	0.943752	0.930718	0.583003	1.05137	1.06543	0.8083
WNT25	-0.0833333	199	0.953366	0.989274	0.71266	0.907778	0.904724	0.630025	0.998955	1.07383	0.795294
WNT25	0	317	0.990779	0.924557	0.624363	0.94886	0.872628	0.559949	1.0327	0.976486	0.688777
WNT25	0.0833333	315	1.00779	0.956071	0.606972	0.967613	0.90274	0.55228	1.04797	1.0094	0.661665
WNT25	0.166667	317	1.02162	0.933242	0.614819	0.980806	0.881994	0.510932	1.06243	0.984491	0.718706
WNT25	0.25	313	0.944864	0.996906	0.696175	0.908382	0.936642	0.614603	0.981346	1.05717	0.777746
WNT25	0.333333	315	1.01792	1.02361	0.646751	0.978834	0.957584	0.589446	1.057	1.08965	0.704055
WNT25	0.416667	324	1.02242	1.04714	0.662527	0.986526	0.98754	0.579527	1.05831	1.10674	0.745528
WNT25	0.5	321	0.99334	1.05023	0.716545	0.956492	0.990754	0.613447	1.03019	1.10971	0.819642
WNT25	0.583333	320	1.02267	1.08879	0.685759	0.980665	1.02946	0.63077	1.06468	1.14812	0.740747
WNT25	0.666667	322	1.00775	1.09447	0.720412	0.973804	1.03864	0.615797	1.0417	1.1503	0.825026
WNT25	0.75	332	1.01711	1.16389	0.697676	0.983079	1.10568	0.655973	1.05115	1.22209	0.739379
WNT25	0.833333	321	1.06055	1.24758	0.793417	1.01745	1.17559	0.704402	1.10365	1.31957	0.882432
WNT25	0.916667	332	1.09396	1.26506	0.741922	1.04605	1.19702	0.687636	1.14186	1.3331	0.796208
WNT25	1	334	1.09498	1.31189	0.743255	1.05843	1.25055	0.702994	1.13153	1.37323	0.783517
WNT25	1.08333	331	1.07437	1.3781	0.839872	1.03508	1.31719	0.76344	1.11366	1.439	0.916304
WNT25	1.16667	333	1.10647	1.39233	0.81987	1.05373	1.33736	0.75451	1.15921	1.4473	0.88523
WNT25	1.25	330	1.11637	1.46848	0.868702	1.07818	1.40416	0.776671	1.15455	1.5328	0.960733
WNT25	1.33333	335	1.14299	1.5166	0.857403	1.10407	1.45232	0.799458	1.1819	1.58088	0.915349
WNT25	1.41667	332	1.14832	1.61014	0.919556	1.10546	1.53637	0.844624	1.19118	1.68392	0.994487
WNT25	1.5	334	1.14727	1.63109	0.993971	1.10182	1.56517	0.88586	1.19272	1.69701	1.10208
WNT25	1.58333	323	1.17239	1.68032	0.955161	1.12981	1.61529	0.885712	1.21498	1.74534	1.02461
WNT25	1.66667	322	1.20829	1.73503	0.90864	1.1664	1.66485	0.857515	1.25018	1.80521	0.959765
WNT25	1.75	325	1.2241	1.79554	0.970319	1.17733	1.72341	0.882744	1.27088	1.86766	1.05789
WNT25	1.83333	322	1.23874	1.83743	0.929261	1.19811	1.76525	0.873593	1.27936	1.9096	0.98493
WNT25	1.91667	317	1.28015	1.88942	0.94306	1.22574	1.81537	0.88427	1.33456	1.96348	1.00185
WNT25	2	331	1.29129	1.96529	0.964519	1.24836	1.89009	0.899046	1.33421	2.04049	1.02999
WNT25	2.08333	318	1.2912	1.99987	0.970355	1.24263	1.92433	0.920406	1.33977	2.07541	1.02031
WNT25	2.16667	317	1.31097	2.03822	0.971758	1.26265	1.96438	0.925729	1.35929	2.11206	1.01779
WNT25	2.25	313	1.30005	2.09281	1.00878	1.25671	2.01215	0.953337	1.34339	2.17346	1.06423
WNT25	2.33333	317	1.32569	2.14267	1.05323	1.2703	2.06349	0.959995	1.38109	2.22185	1.14647
WNT25	2.41667	314	1.37539	2.18123	0.998751	1.31092	2.10162	0.954427	1.43986	2.26084	1.04307
WNT25	2.5	315	1.35943	2.20862	1.03327	1.30837	2.12939	0.973903	1.41049	2.28784	1.09264
WNT25	2.58333	310	1.39212	2.26905	0.996199	1.34566	2.18723	0.956911	1.43857	2.35087	1.03549
WNT25	2.66667	304	1.38217	2.31425	1.03797	1.33423	2.20979	0.983205	1.43011	2.41871	1.09273
WNT25	2.75	311	1.3982	2.34342	1.02423	1.35325	2.24382	0.979355	1.44315	2.44302	1.06911
WNT25	2.83333	312	1.40804	2.3462	1.07397	1.35701	2.26468	1.00757	1.45908	2.42773	1.14037
WNT25	2.91667	299	1.46978	2.35895	0.983042	1.41581	2.27301	0.944246	1.52375	2.4449	1.02184
WNT25	3	304	1.44428	2.41595	1.07422	1.39413	2.33396	1.00506	1.49443	2.49794	1.14339
WNT25	3.08333	301	1.43022	2.43283	1.13826	1.37987	2.34872	1.03335	1.48058	2.51694	1.24317
WNT25	3.16667	303	1.488	2.48337	1.03828	1.43509	2.39209	0.985412	1.54092	2.57465	1.09115
WNT25	3.25	314	1.51254	2.52593	1.06568	1.45585	2.43556	1.00751	1.56923	2.61631	1.12385
WNT25	3.33333	309	1.5162	2.55239	1.07186	1.46127	2.46422	1.00915	1.57113	2.64056	1.13457
WNT25	3.41667	314	1.54019	2.55077	1.08315	1.48539	2.46851	1.00249	1.59499	2.63303	1.16381
WNT25	3.5	307	1.59924	2.58285	1.0152	1.542	2.496	0.958753	1.65648	2.66971	1.07165
WNT25	3.58333	314	1.59991	2.61225	1.01225	1.54514	2.52336	0.971322	1.65468	2.70114	1.05318
WNT25	3.66667	319	1.58508	2.64433	1.08025	1.53041	2.55778	1.0106	1.63975	2.73088	1.14991
WNT25	3.75	309	1.57962	2.6688	1.04256	1.52906	2.58304	1.00163	1.63018	2.75456	1.08349
WNT25	3.83333	306	1.61356	2.71492	1.0705	1.5562	2.61777	1.00279	1.67093	2.81206	1.13821
WNT25	3.91667	296	1.58905	2.70002	1.14969	1.52939	2.60514	1.01966	1.64872	2.79489	1.27973
WNT25	4	301	1.65078	2.76089	1.05565	1.59801	2.66632	0.991917	1.70356	2.85546	1.11938
WNT25	4.08333	302	1.62944	2.77617	1.07248	1.5751	2.68044	1.01606	1.68378	2.8719	1.1289
WNT25	4.16667	303	1.57769	2.7855	1.18721	1.52077	2.69361	1.08975	1.6346	2.8774	1.28466
WNT25	4.25	310	1.6863	2.81398	1.06329	1.62848	2.72134	1.00409	1.74413	2.90661	1.12249
WNT25	4.33333	305	1.67879	2.80555	1.08248	1.62147	2.71247	1.00101	1.7361	2.89864	1.16395
WNT25	4.41667	319	1.68757	2.80918	1.05129	1.63259	2.71704	0.991561	1.74256	2.90131	1.11101
WNT25	4.5	297	1.73056	2.85223	0.995804	1.68011	2.75723	0.963555	1.78101	2.94722	1.02805
WNT25	4.58333	302	1.7029	2.84167	1.02564	1.64857	2.74147	0.980959	1.75723	2.94187	1.07033
WNT25	4.66667	302	1.70746	2.85766	1.05389	1.64968	2.7535	0.983254	1.76523	2.96181	1.12452
WNT25	4.75	309	1.68077	2.87759	1.10233	1.62166	2.77074	1.02808	1.73987	2.98444	1.17657
WNT25	4.83333	317	1.74135	2.87979	1.0516	1.67596	2.77812	0.987123	1.80674	2.98147	1.11609
WNT25	4.91667	318	1.75567	2.87116	1.04318	1.69558	2.7701	0.963442	1.81576	2.97223	1.12291
WNT25	5	325	1.71975	2.84823	1.05436	1.65958	2.7442	0.984191	1.77992	2.95226	1.12453
WNT25	5.08333	322	1.70304	2.84492	1.0848	1.6456	2.74134	0.999628	1.76049	2.9485	1.16998
WNT25	5.16667	319	1.7423	2.84461	1.08584	1.67542	2.73072	0.986377	1.80917	2.9585	1.18531
WNT25	5.25	326	1.73112	2.8356	0.992162	1.67609	2.7241	0.95238	1.78615	2.94709	1.03194
WNT25	5.33333	327	1.70687	2.85319	1.05438	1.64362	2.73995	0.98791	1.77012	2.96642	1.12086
WNT25	5.41667	333	1.70489	2.7812	1.02986	1.64515	2.68164	0.977501	1.76464	2.88076	1.08221
WNT25	5.5	335	1.72198	2.79266	1.02591	1.66122	2.69179	0.956296	1.78274	2.89353	1.09552
WNT25	5.58333	320	1.71872	2.78193	1.05435	1.65512	2.67727	0.981497	1.78232	2.88658	1.1272
WNT25	5.66667	317	1.74238	2.75971	1.01193	1.67992	2.65893	0.936711	1.80484	2.86049	1.08715
WNT25	5.75	315	1.72673	2.80123	1.00971	1.66935	2.69999	0.956219	1.78411	2.90247	1.0632
WNT25	5.83333	316	1.73553	2.7753	1.02054	1.67447	2.67698	0.944239	1.79658	2.87361	1.09684
WNT25	5.91667	321	1.7608	2.76658	0.942796	1.70086	2.66915	0.916599	1.82075	2.86401	0.968993
WNT25	6	317	1.69656	2.81664	0.995555	1.64536	2.71989	0.966061	1.74776	2.91339	1.02505
WNT25	6.08333	326	1.69523	2.7999	1.06462	1.63778	2.70035	0.986253	1.75267	2.89945	1.14299
WNT25	6.16667	332	1.69465	2.80068	1.0748	1.63467	2.69737	1.00654	1.75464	2.90399	1.14306
WNT25	6.25	329	1.68055	2.78607	1.06759	1.62458	2.68399	0.980979	1.73651	2.88814	1.1542
WNT25	6.33333	317	1.67143	2.79386	1.00962	1.62083	2.68921	0.96972	1.72203	2.89851	1.04952
WNT25	6.41667	328	1.62777	2.81053	1.12527	1.57109	2.70303	1.04418	1.68446	2.91804	1.20636
WNT25	6.5	321	1.69364	2.77032	0.993141	1.64198	2.66578	0.953978	1.74531	2.87486	1.0323
WNT25	6.58333	330	1.69479	2.76873	0.986587	1.64155	2.66549	0.954795	1.74803	2.87198	1.01838
WNT25	6.66667	332	1.67995	2.7471	1.03925	1.62733	2.64621	0.975441	1.73258	2.848	1.10305
WNT25	6.75	339	1.7337	2.75593	0.971106	1.67856	2.65641	0.937651	1.78884	2.85545	1.00456
WNT25	6.83333	338	1.71654	2.76045	0.973191	1.6634	2.65801	0.942552	1.76969	2.86288	1.00383
WNT25	6.91667	345	1.70074	2.74926	1.03989	1.64601	2.64983	0.965467	1.75548	2.8487	1.11431
WNT25	7	346	1.68484	2.75403	1.01988	1.63152	2.6523	0.963946	1.73816	2.85576	1.07581
WNT25	7.08333	352	1.69805	2.74043	1.00932	1.64049	2.63782	0.963466	1.75561	2.84305	1.05517
WNT25	7.16667	344	1.6758	2.76788	1.09124	1.61878	2.66467	1.00357	1.73283	2.8711	1.17891
WNT25	7.25	353	1.71162	2.7546	0.995339	1.65707	2.65468	0.952783	1.76618	2.85453	1.03789
WNT25	7.33333	353	1.66965	2.73231	1.01997	1.61445	2.62612	0.97378	1.72486	2.83849	1.06617
WNT25	7.41667	342	1.68567	2.70009	0.99827	1.62932	2.60005	0.948294	1.74203	2.80013	1.04825
WNT25	7.5	344	1.6891	2.71637	1.041	1.62943	2.61114	0.964978	1.74878	2.8216	1.11703
WNT25	7.58333	349	1.67928	2.70275	1.02401	1.62232	2.59918	0.965543	1.73624	2.80632	1.08248
WNT25	7.66667	342	1.70024	2.74267	0.974586	1.63914	2.63318	0.946894	1.76134	2.85217	1.00228
WNT25	7.75	350	1.70779	2.73461	0.973116	1.65233	2.62536	0.938584	1.76324	2.84385	1.00765
WNT25	7.83333	345	1.72597	2.73068	0.972342	1.66568	2.61888	0.936941	1.78626	2.84247	1.00774
WNT25	7.91667	356	1.72534	2.70891	0.938854	1.6663	2.60164	0.914389	1.78439	2.81618	0.96332
WNT25	8	353	1.70613	2.72151	0.96361	1.64393	2.6081	0.93522	1.76833	2.83491	0.992001
WNT25	8.08333	359	1.71916	2.7082	0.951094	1.65894	2.58942	0.918172	1.77937	2.82699	0.984017
WNT25	8.16667	361	1.72497	2.72868	0.960497	1.65855	2.61102	0.931332	1.79139	2.84634	0.989661
WNT25	8.25	362	1.68154	2.71011	0.986386	1.62308	2.59789	0.947866	1.73999	2.82233	1.02491
WNT25	8.33333	362	1.66565	2.71806	0.973863	1.60885	2.60539	0.947662	1.72245	2.83073	1.00006
WNT25	8.41667	360	1.6293	2.68906	1.04363	1.56805	2.57775	0.980724	1.69055	2.80037	1.10654
WNT25	8.5	358	1.63637	2.63858	0.984128	1.57993	2.53323	0.940136	1.69281	2.74392	1.02812
WNT25	8.58333	362	1.65485	2.65678	0.978454	1.59386	2.54975	0.947483	1.71583	2.76381	1.00943
WNT25	8.66667	357	1.68189	2.67021	0.984863	1.61791	2.55605	0.933076	1.74586	2.78438	1.03665
WNT25	8.75	356	1.66466	2.63058	0.960678	1.60656	2.52146	0.921886	1.72275	2.7397	0.999469
WNT25	8.83333	364	1.6818	2.6095	0.933979	1.61973	2.50181	0.906279	1.74388	2.7172	0.961679
WNT25	8.91667	368	1.65656	2.61957	0.997152	1.59651	2.51047	0.936394	1.71661	2.72867	1.05791
WNT25	9	369	1.64923	2.62753	0.964244	1.59447	2.51559	0.929516	1.70399	2.73946	0.998972
WNT25	9.08333	364	1.6209	2.58993	0.992132	1.56502	2.48006	0.938373	1.67678	2.6998	1.04589
WNT25	9.16667	366	1.64765	2.59606	0.948278	1.59379	2.48568	0.918534	1.70151	2.70643	0.978021
WNT25	9.25	368	1.6345	2.57627	0.965947	1.57664	2.46853	0.927791	1.69236	2.68401	1.0041
WNT25	9.33333	361	1.60444	2.55121	1.00242	1.54576	2.4426	0.945744	1.66313	2.65981	1.05909
WNT25	9.41667	360	1.63546	2.56383	0.968767	1.5713	2.45315	0.928505	1.69961	2.67451	1.00903
WNT25	9.5	364	1.60568	2.55179	0.948959	1.55204	2.44063	0.921899	1.65932	2.66296	0.976019
WNT25	9.58333	368	1.6227	2.56756	0.965361	1.5687	2.45562	0.922109	1.67671	2.67949	1.00861
WNT25	9.66667	368	1.62939	2.5727	0.9459	1.57051	2.45497	0.917812	1.68827	2.69043	0.973989
WNT25	9.75	361	1.613	2.52979	0.949129	1.55711	2.41835	0.913259	1.66889	2.64123	0.984998
WNT25	9.83333	363	1.59664	2.51589	0.981541	1.53661	2.41409	0.935653	1.65667	2.61769	1.02743
WNT25	9.91667	360	1.59613	2.49336	0.975408	1.53581	2.38333	0.929903	1.65645	2.60338	1.02091
WNT25	10	367	1.59985	2.48775	0.958028	1.54308	2.3863	0.919715	1.65662	2.5892	0.996341
WNT25	10.0833	372	1.63388	2.51672	0.921743	1.58134	2.41434	0.896243	1.68641	2.6191	0.947243
WNT25	10.1667	370	1.65256	2.55986	0.938453	1.59565	2.45326	0.90741	1.70947	2.66645	0.969496
WNT25	10.25	380	1.62035	2.5633	0.975554	1.56422	2.45785	0.92795	1.67648	2.66876	1.02316
WNT25	10.3333	386	1.62421	2.53796	0.941014	1.57243	2.43774	0.911512	1.67599	2.63818	0.970516
WNT25	10.4167	375	1.59876	2.56299	0.959978	1.54468	2.4465	0.930214	1.65284	2.67948	0.989742
WNT25	10.5	393	1.60052	2.56207	1.0007	1.5394	2.44847	0.953728	1.66164	2.67568	1.04767
WNT25	10.5833	383	1.55653	2.53482	1.02896	1.50395	2.43356	0.966618	1.60911	2.63609	1.0913
WNT25	10.6667	386	1.59101	2.5554	0.997452	1.53448	2.44763	0.948536	1.64754	2.66317	1.04637
WNT25	10.75	388	1.61778	2.52596	0.963314	1.55915	2.41779	0.917577	1.67641	2.63413	1.00905
WNT25	10.8333	387	1.5738	2.49739	1.01756	1.51426	2.39528	0.964778	1.63333	2.5995	1.07035
WNT25	10.9167	388	1.62221	2.50226	0.94242	1.56328	2.39676	0.906792	1.68115	2.60776	0.978048
WNT25	11	386	1.57704	2.53818	1.00906	1.51926	2.43507	0.963725	1.63481	2.64128	1.0544
WNT25	11.0833	385	1.61449	2.53315	0.950718	1.5556	2.42319	0.915906	1.67338	2.64312	0.985529
WNT25	11.1667	384	1.5817	2.49044	0.961216	1.52593	2.38765	0.922773	1.63746	2.59323	0.999659
WNT25	11.25	382	1.58711	2.53281	0.976819	1.52934	2.41754	0.929365	1.64488	2.64808	1.02427
WNT25	11.3333	390	1.60304	2.5006	0.95411	1.54443	2.39137	0.915936	1.66164	2.60983	0.992283
WNT25	11.4167	387	1.55773	2.45923	0.969308	1.50347	2.35295	0.91888	1.61198	2.5655	1.01974
WNT25	11.5	391	1.57683	2.45457	0.991743	1.5175	2.34925	0.932286	1.63616	2.5599	1.0512
WNT25	11.5833	383	1.53828	2.44899	0.986613	1.48614	2.34018	0.935418	1.59041	2.55781	1.03781
WNT25	11.6667	381	1.55607	2.46585	0.976669	1.4976	2.35438	0.934643	1.61454	2.57732	1.01869
WNT25	11.75	382	1.56352	2.41541	0.944264	1.50764	2.31061	0.908353	1.61939	2.5202	0.980176
WNT25	11.8333	382	1.53807	2.4624	1.00151	1.48047	2.3496	0.944121	1.59566	2.57521	1.05891
WNT25	11.9167	388	1.56027	2.47708	0.986136	1.50302	2.36095	0.936664	1.61753	2.59322	1.03561
WNT25	12	388	1.55029	2.47522	1.02045	1.48976	2.3611	0.956725	1.61082	2.58935	1.08417
WNT50	-0.583333	323	1.0168	1.01813	0.590053	0.978288	0.962488	0.552818	1.05531	1.07377	0.627287
WNT50	-0.5	321	0.968403	0.991102	0.611608	0.932543	0.941958	0.566841	1.00426	1.04025	0.656375
WNT50	-0.416667	342	1.02389	1.01773	0.588604	0.988179	0.962665	0.553075	1.05961	1.07279	0.624133
WNT50	-0.333333	341	0.987201	1.0061	0.615109	0.948179	0.954297	0.569014	1.02622	1.05791	0.661203
WNT50	-0.25	340	1.0123	1.01399	0.611301	0.976802	0.960536	0.559772	1.04779	1.06744	0.662829
WNT50	-0.166667	341	1.00465	0.966936	0.558889	0.971979	0.917345	0.527021	1.03732	1.01653	0.590756
WNT50	-0.0833333	224	0.978322	0.979356	0.61653	0.933572	0.926283	0.578046	1.02307	1.03243	0.655014
WNT50	0	350	1.03802	1.01327	0.561357	1.00467	0.958907	0.530449	1.07136	1.06763	0.592265
WNT50	0.0833333	354	1.01104	1.03691	0.592436	0.972618	0.974914	0.554599	1.04947	1.09891	0.630272
WNT50	0.166667	356	0.985741	1.04524	0.611072	0.951308	0.987545	0.573398	1.02017	1.10293	0.648747
WNT50	0.25	354	0.962113	1.0748	0.665538	0.926965	1.01639	0.616663	0.997262	1.13322	0.714413
WNT50	0.333333	355	0.953359	1.04107	0.639774	0.922619	0.985423	0.592059	0.9841	1.09672	0.687489
WNT50	0.416667	351	1.00482	1.06638	0.63212	0.969928	1.01263	0.585769	1.03971	1.12012	0.67847
WNT50	0.5	346	0.988195	1.07442	0.620966	0.952599	1.01958	0.589141	1.02379	1.12925	0.652791
WNT50	0.583333	358	1.04872	1.14191	0.62026	1.01326	1.08195	0.586614	1.08419	1.20188	0.653906
WNT50	0.666667	344	1.04922	1.1548	0.619293	1.01256	1.09333	0.58719	1.08588	1.21628	0.651396
WNT50	0.75	363	1.05555	1.23386	0.675719	1.01969	1.15637	0.625556	1.09141	1.31135	0.725882
WNT50	0.833333	350	1.02465	1.26489	0.705677	0.990008	1.20155	0.666305	1.05928	1.32823	0.745048
WNT50	0.916667	351	1.04564	1.28533	0.716852	1.0091	1.22528	0.670549	1.08219	1.34538	0.763155
WNT50	1	344	1.08981	1.35029	0.700162	1.05584	1.29193	0.667442	1.12377	1.40866	0.732883
WNT50	1.08333	349	1.05308	1.39124	0.769656	1.01978	1.33217	0.722161	1.08638	1.45032	0.817152
WNT50	1.16667	358	1.07371	1.44499	0.77698	1.03723	1.38349	0.737614	1.11019	1.50648	0.816345
WNT50	1.25	363	1.11057	1.51606	0.796038	1.07251	1.45813	0.753997	1.14862	1.57399	0.838079
WNT50	1.33333	360	1.12334	1.58656	0.853289	1.08719	1.5253	0.797482	1.15948	1.64783	0.909096
WNT50	1.41667	372	1.15001	1.66943	0.835006	1.11381	1.60655	0.795639	1.18621	1.73231	0.874372
WNT50	1.5	358	1.17186	1.7321	0.860241	1.13854	1.666	0.803969	1.20517	1.79821	0.916513
WNT50	1.58333	361	1.16286	1.76337	0.930457	1.12267	1.70288	0.85663	1.20306	1.82387	1.00428
WNT50	1.66667	358	1.2269	1.80575	0.857635	1.18203	1.74827	0.817762	1.27176	1.86324	0.897508
WNT50	1.75	368	1.22538	1.90623	0.88401	1.18744	1.83877	0.844949	1.26332	1.97368	0.923071
WNT50	1.83333	368	1.24475	1.94393	0.887507	1.20356	1.88167	0.856286	1.28594	2.00619	0.918729
WNT50	1.91667	366	1.24004	2.02258	0.937997	1.20261	1.95748	0.897818	1.27746	2.08768	0.978176
WNT50	2	360	1.27104	2.07811	0.929448	1.23228	2.00917	0.893817	1.3098	2.14705	0.96508
WNT50	2.08333	361	1.27446	2.1048	0.946203	1.23123	2.038	0.909607	1.31769	2.1716	0.982799
WNT50	2.16667	360	1.31057	2.12903	0.932013	1.26761	2.06287	0.888574	1.35353	2.19518	0.975453
WNT50	2.25	364	1.30958	2.17354	0.936313	1.26883	2.10924	0.905795	1.35033	2.23784	0.966831
WNT50	2.33333	370	1.31815	2.21077	0.964659	1.27622	2.14735	0.925943	1.36009	2.2742	1.00338
WNT50	2.41667	363	1.29268	2.24241	1.02197	1.24683	2.17639	0.970762	1.33853	2.30842	1.07318
WNT50	2.5	372	1.31829	2.29656	1.03618	1.27731	2.23473	0.980989	1.35926	2.35839	1.09137
WNT50	2.58333	364	1.362	2.3441	1.00331	1.30999	2.28184	0.960257	1.41401	2.40636	1.04637
WNT50	2.66667	354	1.35254	2.38014	1.016	1.31462	2.31509	0.966483	1.39045	2.44519	1.06551
WNT50	2.75	362	1.38193	2.39481	0.982854	1.3466	2.33127	0.9473	1.41725	2.45834	1.01841
WNT50	2.83333	345	1.40126	2.41264	0.963773	1.36381	2.34442	0.933211	1.43871	2.48085	0.994334
WNT50	2.91667	354	1.39909	2.45502	1.02776	1.35951	2.3821	0.965674	1.43867	2.52793	1.08984
WNT50	3	353	1.44335	2.53756	0.980541	1.40802	2.46305	0.945995	1.47869	2.61207	1.01509
WNT50	3.08333	359	1.45502	2.50554	0.992191	1.41496	2.43491	0.944612	1.49508	2.57618	1.03977
WNT50	3.16667	359	1.43545	2.5764	1.05536	1.38983	2.50356	1.0041	1.48107	2.64923	1.10663
WNT50	3.25	363	1.48409	2.585	1.0304	1.43853	2.51695	0.973497	1.52964	2.65305	1.08731
WNT50	3.33333	369	1.49834	2.63983	1.03911	1.45199	2.56642	0.982786	1.54469	2.71325	1.09543
WNT50	3.41667	371	1.48935	2.67907	1.11752	1.44041	2.60396	1.03412	1.53828	2.75418	1.20091
WNT50	3.5	362	1.54607	2.68297	1.02076	1.50202	2.61369	0.966092	1.59012	2.75225	1.07543
WNT50	3.58333	370	1.53902	2.75993	1.07258	1.49493	2.69025	1.01159	1.5831	2.8296	1.13357
WNT50	3.66667	370	1.56485	2.80502	1.02149	1.522	2.72845	0.978156	1.6077	2.8816	1.06482
WNT50	3.75	374	1.58139	2.84	1.07332	1.53783	2.7622	0.988923	1.62495	2.9178	1.15772
WNT50	3.83333	373	1.61219	2.855	1.06576	1.56562	2.77882	0.971086	1.65876	2.93118	1.16044
WNT50	3.91667	373	1.60613	2.91388	1.07493	1.55751	2.83328	1.00756	1.65475	2.99448	1.1423
WNT50	4	376	1.6103	2.92057	1.12936	1.56198	2.84209	1.02054	1.65863	2.99905	1.23818
WNT50	4.08333	376	1.64587	2.9118	1.04139	1.59394	2.83241	0.984554	1.69779	2.99119	1.09823
WNT50	4.16667	355	1.66262	2.91159	0.987513	1.61126	2.83234	0.954405	1.71397	2.99084	1.02062
WNT50	4.25	349	1.66711	3.01161	1.05793	1.61461	2.9278	1.00594	1.71962	3.09543	1.10992
WNT50	4.33333	359	1.65383	2.99747	1.12512	1.60141	2.9117	1.0276	1.70625	3.08324	1.22265
WNT50	4.41667	363	1.71899	3.02576	1.00631	1.67128	2.94645	0.962354	1.7667	3.10507	1.05026
WNT50	4.5	358	1.71381	2.99965	0.979762	1.66993	2.91771	0.948838	1.7577	3.0816	1.01069
WNT50	4.58333	357	1.71984	3.03026	0.99108	1.67428	2.9455	0.953899	1.76541	3.11502	1.02826
WNT50	4.66667	356	1.71668	3.08576	1.05268	1.66663	2.99411	0.980964	1.76673	3.17742	1.12439
WNT50	4.75	360	1.74547	3.07842	1.00776	1.70218	2.9946	0.946012	1.78875	3.16223	1.06951
WNT50	4.83333	352	1.70065	3.05884	1.10655	1.64847	2.97092	1.00725	1.75283	3.14676	1.20585
WNT50	4.91667	354	1.72754	3.06521	1.06317	1.67185	2.97626	0.98954	1.78323	3.15416	1.13679
WNT50	5	351	1.70716	3.08041	1.10298	1.65384	2.98842	1.00995	1.76049	3.17241	1.19602
WNT50	5.08333	349	1.74521	3.09772	1.01773	1.69463	3.0089	0.973547	1.79579	3.18654	1.06192
WNT50	5.16667	349	1.69379	3.12613	1.12493	1.63972	3.03256	1.04088	1.74786	3.21971	1.20898
WNT50	5.25	344	1.72946	3.11964	1.01431	1.6802	3.02791	0.979655	1.77872	3.21138	1.04896
WNT50	5.33333	344	1.75324	3.09663	1.03402	1.68469	3.00472	0.979197	1.82178	3.18853	1.08884
WNT50	5.41667	347	1.71275	3.10961	1.08015	1.65931	3.0213	1.0132	1.76619	3.19793	1.1471
WNT50	5.5	362	1.74034	3.09027	1.0356	1.69041	3.0017	0.976369	1.79027	3.17884	1.09484
WNT50	5.58333	358	1.69852	3.14827	1.09397	1.64467	3.05977	1.03694	1.75238	3.23678	1.15099
WNT50	5.66667	364	1.73228	3.10934	1.04722	1.68146	3.01582	0.988288	1.7831	3.20285	1.10616
WNT50	5.75	373	1.73821	3.20647	1.11259	1.67732	3.10715	1.04132	1.79911	3.3058	1.18386
WNT50	5.83333	369	1.72446	3.16466	1.1137	1.66985	3.06793	1.04404	1.77907	3.2614	1.18336
WNT50	5.91667	362	1.68423	3.16334	1.11334	1.63329	3.06977	1.04725	1.73518	3.25691	1.17943
WNT50	6	374	1.70695	3.16372	1.08019	1.6555	3.06856	1.0253	1.75841	3.25887	1.13507
WNT50	6.08333	366	1.73269	3.15965	1.10711	1.67762	3.0614	1.02531	1.78776	3.25789	1.18891
WNT50	6.16667	368	1.73577	3.1603	1.05963	1.68076	3.06426	1.01107	1.79077	3.25635	1.10818
WNT50	6.25	363	1.72365	3.116	1.06914	1.66947	3.01889	1.01287	1.77782	3.2131	1.12542
WNT50	6.33333	358	1.72521	3.16129	1.09839	1.6688	3.06784	1.03102	1.78161	3.25473	1.16577
WNT50	6.41667	365	1.80655	3.20563	1.04503	1.71922	3.10192	0.986955	1.89387	3.30934	1.1031
WNT50	6.5	355	1.75834	3.19433	1.07431	1.70394	3.09053	1.00155	1.81274	3.29812	1.14708
WNT50	6.58333	365	1.75656	3.19946	1.0365	1.70653	3.09683	0.982121	1.80659	3.30208	1.09087
WNT50	6.66667	369	1.732	3.17287	1.11821	1.6734	3.0679	1.03044	1.79061	3.27785	1.20599
WNT50	6.75	369	1.74741	3.19911	1.06083	1.68222	3.0902	1.00679	1.8126	3.30801	1.11488
WNT50	6.83333	364	1.75772	3.15757	1.0498	1.70125	3.05032	0.989916	1.81418	3.26482	1.10969
WNT50	6.91667	361	1.73505	3.17035	1.05211	1.67942	3.06368	1.00212	1.79069	3.27702	1.10209
WNT50	7	363	1.74586	3.10539	1.03647	1.68416	3.00063	0.984309	1.80756	3.21016	1.08862
WNT50	7.08333	370	1.72876	3.08412	1.06104	1.67294	2.98195	0.980849	1.78458	3.18628	1.14124
WNT50	7.16667	371	1.76469	3.13394	1.05352	1.70819	3.02518	0.966451	1.82119	3.2427	1.1406
WNT50	7.25	363	1.73738	3.13468	1.04761	1.68029	3.0278	0.99065	1.79447	3.24155	1.10457
WNT50	7.33333	362	1.75833	3.14452	1.03416	1.69759	3.0372	0.975709	1.81906	3.25184	1.09262
WNT50	7.41667	366	1.76593	3.13313	1.01237	1.71149	3.02389	0.963048	1.82036	3.24236	1.06169
WNT50	7.5	366	1.75478	3.14758	1.0074	1.70274	3.03799	0.966432	1.80682	3.25718	1.04836
WNT50	7.58333	367	1.75156	3.17328	1.06908	1.69529	3.06018	0.982763	1.80783	3.28637	1.15539
WNT50	7.66667	377	1.75244	3.21792	1.11057	1.69148	3.10083	0.992106	1.8134	3.33502	1.22904
WNT50	7.75	370	1.77137	3.17993	1.01456	1.71679	3.07168	0.969822	1.82594	3.28818	1.0593
WNT50	7.83333	372	1.76205	3.19795	1.11481	1.70133	3.08488	1.0099	1.82277	3.31102	1.21973
WNT50	7.91667	369	1.77906	3.1961	1.03164	1.72499	3.08246	0.974507	1.83313	3.30975	1.08877
WNT50	8	379	1.7205	3.16504	1.09341	1.66349	3.05191	1.028	1.77752	3.27818	1.15882
WNT50	8.08333	375	1.74837	3.13342	1.00494	1.6927	3.02344	0.971201	1.80403	3.24341	1.03867
WNT50	8.16667	376	1.74701	3.10918	1.04999	1.6912	2.99904	0.983099	1.80281	3.21933	1.11687
WNT50	8.25	365	1.7569	3.1137	1.00385	1.70099	3.00082	0.95919	1.81281	3.22658	1.0485
WNT50	8.33333	373	1.75674	3.09801	0.992341	1.70269	2.98241	0.949965	1.81078	3.21361	1.03472
WNT50	8.41667	381	1.69653	3.08047	1.05416	1.64086	2.96348	0.985649	1.7522	3.19745	1.12266
WNT50	8.5	376	1.72661	3.08015	1.05726	1.67023	2.96328	0.980975	1.78298	3.19702	1.13355
WNT50	8.58333	385	1.7389	3.06006	1.00418	1.68299	2.94613	0.960456	1.79481	3.17398	1.04789
WNT50	8.66667	388	1.72605	3.05149	1.04002	1.66757	2.93296	0.977812	1.78452	3.17003	1.10223
WNT50	8.75	378	1.71988	3.0182	1.02675	1.66084	2.9039	0.968942	1.77891	3.13249	1.08456
WNT50	8.83333	374	1.71543	3.03773	1.00508	1.65868	2.91989	0.957305	1.77217	3.15556	1.05285
WNT50	8.91667	384	1.72331	3.0231	0.980112	1.66822	2.90329	0.944723	1.77839	3.14292	1.0155
WNT50	9	383	1.69528	3.01686	1.02072	1.6382	2.90001	0.976267	1.75236	3.1337	1.06517
WNT50	9.08333	380	1.68697	2.99803	1.00666	1.6312	2.88206	0.965184	1.74275	3.114	1.04813
WNT50	9.16667	384	1.69451	3.03094	1.01059	1.63947	2.90981	0.962266	1.74954	3.15206	1.05891
WNT50	9.25	369	1.69594	3.00689	0.999169	1.6383	2.8876	0.95685	1.75357	3.12618	1.04149
WNT50	9.33333	373	1.70556	2.97822	0.966982	1.64999	2.85964	0.933676	1.76112	3.0968	1.00029
WNT50	9.41667	377	1.68442	2.9533	0.973236	1.62838	2.83843	0.943696	1.74046	3.06818	1.00278
WNT50	9.5	373	1.71157	2.94163	0.951912	1.65563	2.82205	0.916983	1.76751	3.06121	0.986842
WNT50	9.58333	374	1.71658	2.96211	0.975848	1.65916	2.84357	0.932808	1.774	3.08064	1.01889
WNT50	9.66667	374	1.73508	2.97176	0.939116	1.68016	2.8539	0.911432	1.79	3.08961	0.966801
WNT50	9.75	370	1.69663	2.90881	1.01383	1.63319	2.79101	0.932406	1.76008	3.02661	1.09525
WNT50	9.83333	379	1.70966	2.9296	1.0163	1.64642	2.80836	0.946917	1.7729	3.05084	1.08569
WNT50	9.91667	380	1.68614	2.92309	1.00379	1.62634	2.80299	0.946949	1.74593	3.04318	1.06063
WNT50	10	378	1.66901	2.89975	0.990652	1.60874	2.77887	0.946453	1.72929	3.02063	1.03485
WNT50	10.0833	372	1.70129	2.84982	0.923133	1.64356	2.72959	0.895314	1.75902	2.97005	0.950952
WNT50	10.1667	365	1.63195	2.80671	1.00842	1.56873	2.68736	0.949849	1.69518	2.92606	1.06699
WNT50	10.25	371	1.71716	2.86477	0.945921	1.65841	2.74236	0.883511	1.77591	2.98718	1.00833
WNT50	10.3333	372	1.66486	2.8393	0.999234	1.6035	2.72029	0.93887	1.72623	2.9583	1.0596
WNT50	10.4167	381	1.68496	2.85974	0.951481	1.62814	2.74066	0.910263	1.74178	2.97883	0.9927
WNT50	10.5	372	1.68553	2.84641	0.947428	1.62936	2.7269	0.894006	1.74171	2.96593	1.00085
WNT50	10.5833	375	1.67222	2.81504	0.944251	1.61417	2.69626	0.907813	1.73027	2.93382	0.98069
WNT50	10.6667	380	1.69082	2.83009	0.915359	1.63506	2.70995	0.888486	1.74658	2.95022	0.942233
WNT50	10.75	374	1.68564	2.84668	0.944228	1.62562	2.7253	0.90557	1.74567	2.96805	0.982886
WNT50	10.8333	376	1.68427	2.85188	0.953047	1.62496	2.73015	0.911517	1.74357	2.9736	0.994578
WNT50	10.9167	377	1.66432	2.87876	0.997719	1.60102	2.75528	0.950764	1.72762	3.00224	1.04467
WNT50	11	385	1.67954	2.86701	0.974693	1.61625	2.74671	0.930061	1.74282	2.98731	1.01933
WNT50	11.0833	385	1.6405	2.85873	1.00651	1.57947	2.73577	0.956773	1.70153	2.98169	1.05625
WNT50	11.1667	393	1.65012	2.902	0.979692	1.59329	2.77681	0.941396	1.70695	3.02719	1.01799
WNT50	11.25	376	1.65816	2.85799	0.977183	1.59818	2.73126	0.934822	1.71814	2.98472	1.01954
WNT50	11.3333	382	1.66597	2.89134	0.969975	1.60788	2.76441	0.925095	1.72406	3.01827	1.01485
WNT50	11.4167	386	1.64994	2.87833	1.01794	1.58932	2.75293	0.95373	1.71056	3.00374	1.08215
WNT50	11.5	375	1.67387	2.85329	0.998062	1.61062	2.72609	0.919451	1.73712	2.9805	1.07667
WNT50	11.5833	372	1.64451	2.85906	0.996558	1.58352	2.7292	0.93786	1.7055	2.98892	1.05525
WNT50	11.6667	390	1.63854	2.85918	1.01502	1.57977	2.73457	0.955544	1.69731	2.98379	1.0745
WNT50	11.75	382	1.6588	2.83153	0.958283	1.60125	2.70667	0.919269	1.71634	2.95639	0.997297
WNT50	11.8333	379	1.65171	2.81495	0.947568	1.59014	2.68995	0.915954	1.71329	2.93995	0.979182
WNT50	11.9167	376	1.61978	2.80559	0.998822	1.55933	2.67983	0.943315	1.68023	2.93135	1.05433
WNT50	12	381	1.63756	2.82967	0.966799	1.58057	2.70354	0.924249	1.69454	2.9558	1.00935
WNT75	-0.583333	296	1.02042	1.00559	0.600306	0.979463	0.910374	0.548968	1.06137	1.1008	0.651643
WNT75	-0.5	304	0.946222	1.01627	0.693389	0.910421	0.94442	0.611774	0.982023	1.08813	0.775003
WNT75	-0.416667	298	1.01177	1.02714	0.649909	0.970638	0.956131	0.572945	1.0529	1.09815	0.726874
WNT75	-0.333333	295	0.997122	1.00621	0.641954	0.953416	0.93795	0.570308	1.04083	1.07447	0.713599
WNT75	-0.25	296	1.0478	0.988091	0.565364	1.00752	0.927663	0.529939	1.08808	1.04852	0.600789
WNT75	-0.166667	297	0.985557	0.984712	0.603883	0.946564	0.920083	0.559875	1.02455	1.04934	0.647892
WNT75	-0.0833333	155	0.985731	0.945458	0.624303	0.936978	0.877463	0.577028	1.03448	1.01345	0.671578
WNT75	0	304	0.974778	1.06172	0.685392	0.939347	0.991109	0.608418	1.01021	1.13233	0.762366
WNT75	0.0833333	302	1.02855	1.03442	0.600017	0.987457	0.965437	0.560164	1.06965	1.1034	0.63987
WNT75	0.166667	311	0.976136	1.04758	0.66595	0.936521	0.980961	0.607071	1.01575	1.1142	0.724828
WNT75	0.25	303	1.02201	1.08527	0.648696	0.975859	1.00923	0.593187	1.06816	1.16132	0.704206
WNT75	0.333333	305	0.995078	1.06128	0.662436	0.956736	0.987044	0.606046	1.03342	1.13552	0.718826
WNT75	0.416667	300	1.00785	1.05741	0.69181	0.96326	0.992239	0.592903	1.05244	1.12258	0.790717
WNT75	0.5	312	1.04049	1.14715	0.673657	1.00124	1.06108	0.618304	1.07973	1.23322	0.729009
WNT75	0.583333	316	1.06298	1.16848	0.709807	1.01797	1.09494	0.649647	1.10799	1.24202	0.769967
WNT75	0.666667	322	1.01413	1.21381	0.731251	0.978505	1.14613	0.684104	1.04975	1.28148	0.778398
WNT75	0.75	314	1.07917	1.22498	0.693189	1.03756	1.16066	0.652371	1.12078	1.28931	0.734006
WNT75	0.833333	313	1.05326	1.25946	0.731015	1.01452	1.18531	0.678277	1.09199	1.33361	0.783753
WNT75	0.916667	317	1.06136	1.28948	0.745055	1.02326	1.2208	0.696926	1.09946	1.35817	0.793184
WNT75	1	319	1.09012	1.35842	0.785892	1.04238	1.2938	0.732694	1.13786	1.42303	0.83909
WNT75	1.08333	311	1.12049	1.45384	0.827946	1.07249	1.36915	0.753708	1.16849	1.53852	0.902184
WNT75	1.16667	318	1.14476	1.49627	0.824001	1.10084	1.42799	0.760831	1.18868	1.56456	0.887171
WNT75	1.25	327	1.16001	1.5229	0.81238	1.11591	1.45863	0.7621	1.20412	1.58717	0.86266
WNT75	1.33333	338	1.17591	1.59452	0.864903	1.13023	1.53068	0.801392	1.2216	1.65836	0.928415
WNT75	1.41667	332	1.20375	1.6381	0.813662	1.15823	1.57297	0.779223	1.24927	1.70322	0.848101
WNT75	1.5	345	1.20135	1.69646	0.897335	1.16208	1.62976	0.808627	1.24063	1.76317	0.986042
WNT75	1.58333	335	1.19848	1.72195	0.912259	1.15759	1.65314	0.831823	1.23937	1.79075	0.992695
WNT75	1.66667	336	1.22431	1.75102	0.86992	1.18539	1.68869	0.829187	1.26323	1.81334	0.910653
WNT75	1.75	324	1.22663	1.77037	0.943845	1.18215	1.70588	0.854019	1.27111	1.83485	1.03367
WNT75	1.83333	341	1.28334	1.84541	0.87147	1.24316	1.78425	0.830162	1.32351	1.90657	0.912778
WNT75	1.91667	334	1.27445	1.84921	0.874904	1.23437	1.78784	0.836965	1.31454	1.91059	0.912844
WNT75	2	320	1.29481	1.89232	0.882313	1.25488	1.83306	0.845487	1.33473	1.95159	0.91914
WNT75	2.08333	320	1.31037	1.98449	0.932898	1.26846	1.91613	0.878926	1.35228	2.05285	0.98687
WNT75	2.16667	333	1.30177	1.99816	0.976661	1.25827	1.93295	0.912434	1.34527	2.06337	1.04089
WNT75	2.25	327	1.3117	2.03663	0.961536	1.2675	1.96792	0.908203	1.3559	2.10534	1.01487
WNT75	2.33333	335	1.34431	2.1161	1.00268	1.29792	2.04184	0.927688	1.3907	2.19037	1.07767
WNT75	2.41667	336	1.34917	2.14303	1.00993	1.30592	2.06355	0.922377	1.39241	2.22251	1.09749
WNT75	2.5	331	1.40495	2.20258	1.01108	1.35735	2.12457	0.91307	1.45254	2.28059	1.1091
WNT75	2.58333	327	1.41187	2.22305	1.0101	1.36481	2.14767	0.911542	1.45893	2.29844	1.10866
WNT75	2.66667	336	1.4103	2.26011	0.983785	1.36497	2.19085	0.939085	1.45563	2.32937	1.02848
WNT75	2.75	338	1.41871	2.2843	0.985681	1.37447	2.21199	0.935881	1.46294	2.35661	1.03548
WNT75	2.83333	348	1.43138	2.36398	1.03964	1.38475	2.28694	0.957059	1.478	2.44101	1.12222
WNT75	2.91667	342	1.47938	2.39247	0.993609	1.43204	2.31463	0.939786	1.52672	2.47032	1.04743
WNT75	3	326	1.47797	2.40459	1.00656	1.42691	2.32953	0.953233	1.52903	2.47965	1.05988
WNT75	3.08333	333	1.5115	2.44024	0.957529	1.46962	2.36727	0.921961	1.55338	2.51322	0.993098
WNT75	3.16667	330	1.52004	2.47665	0.96758	1.47641	2.40399	0.932809	1.56366	2.54931	1.00235
WNT75	3.25	331	1.54074	2.51815	1.02419	1.48723	2.44241	0.962135	1.59425	2.59388	1.08625
WNT75	3.33333	322	1.55451	2.51526	0.990096	1.50434	2.43735	0.937946	1.60469	2.59318	1.04225
WNT75	3.41667	339	1.58376	2.59189	1.01668	1.52641	2.50764	0.964656	1.6411	2.67614	1.06871
WNT75	3.5	336	1.56415	2.59408	1.04765	1.51732	2.51321	0.968384	1.61099	2.67496	1.12692
WNT75	3.58333	331	1.60246	2.65387	1.01753	1.55302	2.57759	0.964989	1.6519	2.73014	1.07008
WNT75	3.66667	327	1.60041	2.67754	1.06643	1.54944	2.60017	0.982466	1.65138	2.75491	1.15039
WNT75	3.75	329	1.64373	2.67942	1.00602	1.59338	2.60146	0.946466	1.69409	2.75738	1.06558
WNT75	3.83333	331	1.66341	2.74017	1.05722	1.61132	2.65676	0.970309	1.7155	2.82358	1.14413
WNT75	3.91667	323	1.68973	2.76172	1.0507	1.62482	2.67989	0.972559	1.75464	2.84355	1.12883
WNT75	4	321	1.68628	2.84283	0.999953	1.6394	2.75265	0.960241	1.73317	2.933	1.03967
WNT75	4.08333	325	1.68977	2.83344	1.08709	1.62794	2.74792	1.01023	1.75159	2.91897	1.16394
WNT75	4.16667	327	1.69164	2.83359	1.07814	1.63472	2.75145	0.975155	1.74855	2.91574	1.18113
WNT75	4.25	322	1.69622	2.81034	1.08031	1.63946	2.72739	0.962595	1.75299	2.89328	1.19802
WNT75	4.33333	332	1.69022	2.86561	1.10609	1.63587	2.77402	0.997848	1.74456	2.9572	1.21434
WNT75	4.41667	329	1.69685	2.85723	1.00521	1.6473	2.76924	0.965389	1.74641	2.94522	1.04503
WNT75	4.5	325	1.68717	2.8812	1.06955	1.62901	2.79097	1.00709	1.74533	2.97143	1.13201
WNT75	4.58333	325	1.72332	2.88486	1.05207	1.66497	2.79906	0.986963	1.78167	2.97066	1.11717
WNT75	4.66667	327	1.75045	2.91007	1.08792	1.68491	2.8244	1.00174	1.81598	2.99575	1.17409
WNT75	4.75	330	1.71087	2.9346	1.10862	1.65031	2.84348	1.02983	1.77143	3.02572	1.18741
WNT75	4.83333	323	1.74624	2.92052	1.09234	1.6844	2.83289	0.984898	1.80808	3.00816	1.19978
WNT75	4.91667	332	1.75109	2.9394	1.06669	1.69219	2.85285	0.998663	1.80999	3.02596	1.13472
WNT75	5	332	1.80476	2.94713	0.990306	1.74639	2.85748	0.944459	1.86312	3.03678	1.03615
WNT75	5.08333	332	1.78042	2.91659	0.981673	1.72651	2.83157	0.944968	1.83432	3.00161	1.01838
WNT75	5.16667	339	1.78163	2.95532	0.999218	1.72906	2.86703	0.951012	1.8342	3.04362	1.04742
WNT75	5.25	335	1.76153	2.95396	1.05628	1.70344	2.86578	0.988185	1.81963	3.04214	1.12438
WNT75	5.33333	324	1.77506	2.92404	1.08119	1.71711	2.83638	0.982876	1.833	3.0117	1.1795
WNT75	5.41667	326	1.77906	2.96556	0.981784	1.72672	2.87657	0.952789	1.83139	3.05455	1.01078
WNT75	5.5	336	1.80906	2.97317	1.01056	1.7485	2.88281	0.952855	1.86962	3.06352	1.06827
WNT75	5.58333	328	1.80834	2.97539	1.01398	1.7445	2.88131	0.960779	1.87217	3.06947	1.06718
WNT75	5.66667	328	1.82739	2.95474	1.0579	1.73157	2.86008	0.971899	1.92322	3.04939	1.1439
WNT75	5.75	329	1.76631	2.97364	1.06394	1.70386	2.87718	0.997998	1.82877	3.07011	1.12988
WNT75	5.83333	339	1.79805	3.00161	1.02744	1.73415	2.90399	0.975048	1.86194	3.09924	1.07984
WNT75	5.91667	336	1.79011	2.99063	1.06001	1.7261	2.89197	0.975884	1.85412	3.08928	1.14414
WNT75	6	337	1.7927	2.9452	0.981375	1.73731	2.84898	0.942846	1.84809	3.04142	1.0199
WNT75	6.08333	330	1.74447	2.94534	1.06419	1.68874	2.84847	0.96491	1.8002	3.04222	1.16346
WNT75	6.16667	330	1.77384	2.91012	0.982323	1.71675	2.81411	0.942457	1.83094	3.00613	1.02219
WNT75	6.25	332	1.76022	2.93586	1.02836	1.69768	2.8417	0.978772	1.82277	3.03001	1.07795
WNT75	6.33333	328	1.79347	2.90371	0.959991	1.7275	2.805	0.926358	1.85943	3.00242	0.993624
WNT75	6.41667	329	1.7556	2.93582	1.02607	1.68971	2.8322	0.961282	1.82149	3.03945	1.09085
WNT75	6.5	331	1.73575	2.91393	1.0769	1.66838	2.81448	0.995293	1.80312	3.01339	1.1585
WNT75	6.58333	338	1.73897	2.85198	1.07986	1.67468	2.75634	0.970508	1.80326	2.94762	1.18922
WNT75	6.66667	329	1.75508	2.88781	0.99487	1.69253	2.77539	0.942428	1.81763	3.00024	1.04731
WNT75	6.75	334	1.7688	2.92077	1.06455	1.69932	2.80089	0.962649	1.83828	3.04064	1.16645
WNT75	6.83333	335	1.74833	2.89257	1.00939	1.68806	2.78266	0.955453	1.8086	3.00247	1.06332
WNT75	6.91667	327	1.73823	2.91165	1.02766	1.67812	2.80055	0.964155	1.79835	3.02275	1.09116
WNT75	7	339	1.72082	2.9185	1.06675	1.64437	2.80368	0.994821	1.79726	3.03332	1.13868
WNT75	7.08333	334	1.7196	2.86199	1.13351	1.64876	2.7557	1.00158	1.79043	2.96829	1.26544
WNT75	7.16667	333	1.72379	2.86628	1.0838	1.65584	2.75264	0.980585	1.79174	2.97993	1.18702
WNT75	7.25	340	1.72708	2.87429	1.12438	1.6587	2.75909	0.998698	1.79546	2.98948	1.25007
WNT75	7.33333	333	1.71557	2.84424	1.0751	1.65058	2.73526	0.976626	1.78056	2.95322	1.17358
WNT75	7.41667	338	1.72109	2.84374	1.0436	1.66064	2.73717	0.957824	1.78154	2.9503	1.12938
WNT75	7.5	332	1.70401	2.81859	1.01191	1.64242	2.70987	0.947017	1.76561	2.92731	1.07681
WNT75	7.58333	332	1.68291	2.84706	1.00989	1.62464	2.73479	0.966215	1.74118	2.95933	1.05357
WNT75	7.66667	330	1.71448	2.83769	0.989003	1.65426	2.71957	0.941614	1.77469	2.95582	1.03639
WNT75	7.75	326	1.73443	2.83374	1.03324	1.66775	2.71876	0.957407	1.80112	2.94871	1.10907
WNT75	7.83333	325	1.7119	2.82569	1.08108	1.64495	2.70494	0.972002	1.77885	2.94644	1.19015
WNT75	7.91667	330	1.71976	2.81316	0.989748	1.6545	2.69638	0.935707	1.78503	2.92993	1.04379
WNT75	8	323	1.71589	2.80014	0.974921	1.65178	2.68489	0.928028	1.78	2.9154	1.02182
WNT75	8.08333	334	1.70987	2.79614	1.00521	1.64606	2.68287	0.945973	1.77368	2.90941	1.06445
WNT75	8.16667	341	1.67941	2.75973	1.10762	1.61223	2.64655	0.981424	1.74659	2.87292	1.23382
WNT75	8.25	338	1.65478	2.77817	1.12486	1.59145	2.66796	1.00153	1.71811	2.88837	1.24818
WNT75	8.33333	333	1.67579	2.73558	1.023	1.61639	2.62438	0.929011	1.73519	2.84679	1.11698
WNT75	8.41667	337	1.72342	2.72514	0.939794	1.66227	2.61998	0.898013	1.78458	2.83031	0.981575
WNT75	8.5	335	1.66268	2.71778	1.02206	1.59983	2.60758	0.952149	1.72553	2.82799	1.09198
WNT75	8.58333	335	1.68705	2.73062	1.06594	1.61449	2.61813	0.960506	1.75962	2.84311	1.17138
WNT75	8.66667	342	1.7298	2.75434	1.00486	1.65501	2.63741	0.920463	1.80459	2.87128	1.08926
WNT75	8.75	344	1.71125	2.76684	1.01313	1.64221	2.64553	0.92201	1.7803	2.88816	1.10426
WNT75	8.83333	337	1.66839	2.74159	1.0992	1.60115	2.62032	0.970673	1.73564	2.86285	1.22772
WNT75	8.91667	342	1.69756	2.71983	0.974503	1.63489	2.60465	0.890821	1.76023	2.83501	1.05818
WNT75	9	333	1.68572	2.70531	0.963123	1.62455	2.58648	0.902017	1.74689	2.82415	1.02423
WNT75	9.08333	325	1.66513	2.67252	0.954868	1.6024	2.55739	0.915007	1.72786	2.78766	0.99473
WNT75	9.16667	329	1.65811	2.64591	1.00018	1.59824	2.53301	0.901091	1.71798	2.7588	1.09927
WNT75	9.25	326	1.63494	2.6463	1.04773	1.57201	2.53106	0.93564	1.69786	2.76154	1.15983
WNT75	9.33333	327	1.58648	2.60476	1.04006	1.52613	2.48939	0.954924	1.64683	2.72012	1.12519
WNT75	9.41667	326	1.61499	2.6028	1.00746	1.55387	2.49104	0.912857	1.67611	2.71457	1.10206
WNT75	9.5	330	1.61517	2.57715	0.973937	1.55667	2.46646	0.896591	1.67367	2.68783	1.05128
WNT75	9.58333	332	1.60744	2.56702	1.03239	1.54236	2.45326	0.939272	1.67252	2.68077	1.12551
WNT75	9.66667	337	1.62184	2.56434	1.01751	1.5571	2.45401	0.92971	1.68657	2.67466	1.10532
WNT75	9.75	330	1.5973	2.54659	1.0248	1.53418	2.43716	0.927079	1.66043	2.65603	1.12253
WNT75	9.83333	334	1.61539	2.5413	0.975674	1.55604	2.43378	0.894835	1.67474	2.64882	1.05651
WNT75	9.91667	335	1.61976	2.54478	0.943299	1.55675	2.43346	0.897564	1.68276	2.6561	0.989034
WNT75	10	334	1.60883	2.55189	0.97808	1.54405	2.4403	0.90683	1.67362	2.66348	1.04933
WNT75	10.0833	336	1.60008	2.5223	0.936919	1.54129	2.41239	0.89743	1.65887	2.63222	0.976407
WNT75	10.1667	328	1.58218	2.47957	0.962475	1.5195	2.37194	0.9088	1.64487	2.58719	1.01615
WNT75	10.25	348	1.6062	2.51646	0.972035	1.54469	2.40843	0.899754	1.66771	2.62449	1.04432
WNT75	10.3333	343	1.59576	2.46142	0.944346	1.53842	2.35797	0.872324	1.65309	2.56487	1.01637
WNT75	10.4167	341	1.57253	2.45425	0.925801	1.52029	2.34883	0.882809	1.62477	2.55968	0.968793
WNT75	10.5	336	1.57519	2.50007	0.933724	1.52138	2.39391	0.897038	1.62901	2.60623	0.970411
WNT75	10.5833	333	1.58711	2.46516	0.923795	1.52889	2.35532	0.886163	1.64533	2.57501	0.961426
WNT75	10.6667	331	1.61072	2.47985	0.943091	1.54696	2.36763	0.884328	1.67449	2.59207	1.00185
WNT75	10.75	338	1.56359	2.44144	0.93684	1.50823	2.33559	0.883898	1.61894	2.5473	0.989781
WNT75	10.8333	331	1.56386	2.43764	0.950538	1.50841	2.33163	0.878908	1.6193	2.54364	1.02217
WNT75	10.9167	330	1.54859	2.41721	0.913335	1.49431	2.31281	0.878065	1.60288	2.52162	0.948604
WNT75	11	335	1.55202	2.43211	0.964121	1.49178	2.32633	0.905069	1.61225	2.53789	1.02317
WNT75	11.0833	345	1.5878	2.43538	0.925092	1.53416	2.32437	0.860788	1.64143	2.5464	0.989397
WNT75	11.1667	337	1.53433	2.42036	0.969324	1.47793	2.31904	0.908469	1.59073	2.52169	1.03018
WNT75	11.25	344	1.55912	2.40732	0.910757	1.50427	2.30511	0.870511	1.61397	2.50953	0.951003
WNT75	11.3333	346	1.55183	2.42939	0.954601	1.48965	2.32381	0.905353	1.61401	2.53497	1.00385
WNT75	11.4167	338	1.57829	2.42906	0.936246	1.51345	2.31925	0.884235	1.64312	2.53887	0.988257
WNT75	11.5	339	1.53734	2.40957	0.996879	1.47598	2.2997	0.920861	1.59871	2.51943	1.0729
WNT75	11.5833	340	1.55481	2.39816	0.945311	1.4902	2.28974	0.891985	1.61943	2.50658	0.998638
WNT75	11.6667	347	1.53827	2.36299	0.969078	1.48124	2.26123	0.887531	1.5953	2.46475	1.05062
WNT75	11.75	330	1.51639	2.3789	0.966511	1.45416	2.26217	0.901011	1.57861	2.49562	1.03201
WNT75	11.8333	331	1.52941	2.42162	0.962953	1.46565	2.30379	0.907013	1.59318	2.53945	1.01889
WNT75	11.9167	329	1.50588	2.37323	0.980145	1.44435	2.26552	0.91781	1.5674	2.48094	1.04248
WNT75	12	336	1.51982	2.37822	0.989557	1.45369	2.26086	0.92135	1.58594	2.49558	1.05776
WNT100	-0.583333	313	0.984329	1.00738	0.658501	0.946485	0.935874	0.578832	1.02217	1.07889	0.738169
WNT100	-0.5	322	0.974541	0.978574	0.620705	0.937358	0.913201	0.572427	1.01172	1.04395	0.668982
WNT100	-0.416667	313	1.01047	0.991055	0.610639	0.970023	0.927628	0.56404	1.05091	1.05448	0.657239
WNT100	-0.333333	316	1.0132	1.02692	0.659517	0.968408	0.956536	0.598782	1.058	1.09731	0.720252
WNT100	-0.25	308	1.01204	0.983376	0.609666	0.969293	0.919253	0.551378	1.05478	1.0475	0.667954
WNT100	-0.166667	309	1.01361	1.00559	0.635483	0.971463	0.932237	0.574433	1.05577	1.07895	0.696533
WNT100	-0.0833333	178	0.987303	1.01277	0.737071	0.932532	0.931237	0.631633	1.04207	1.09431	0.84251
WNT100	0	312	0.990653	1.01925	0.644157	0.952149	0.955656	0.593652	1.02916	1.08284	0.694663
WNT100	0.0833333	296	0.984462	0.995494	0.609214	0.945097	0.927483	0.568451	1.02383	1.0635	0.649977
WNT100	0.166667	305	0.962527	0.997596	0.642486	0.924146	0.932685	0.598438	1.00091	1.06251	0.686534
WNT100	0.25	318	0.962499	1.06091	0.724304	0.92296	0.993963	0.643102	1.00204	1.12785	0.805505
WNT100	0.333333	306	1.02666	1.02247	0.620144	0.987344	0.970335	0.578048	1.06598	1.07461	0.662241
WNT100	0.416667	298	0.988631	1.09168	0.706727	0.949681	1.03277	0.642753	1.02758	1.1506	0.770701
WNT100	0.5	316	1.066	1.12801	0.658052	1.02358	1.06629	0.61694	1.10842	1.18973	0.699164
WNT100	0.583333	304	1.09009	1.11996	0.638187	1.04664	1.05765	0.595931	1.13353	1.18227	0.680444
WNT100	0.666667	325	1.09006	1.16168	0.684243	1.04559	1.09745	0.619068	1.13452	1.22592	0.749417
WNT100	0.75	320	1.07447	1.2267	0.737895	1.03506	1.16137	0.670583	1.11388	1.29204	0.805208
WNT100	0.833333	319	1.08414	1.30531	0.765515	1.043	1.23308	0.694185	1.12528	1.37755	0.836846
WNT100	0.916667	331	1.11522	1.33792	0.730188	1.07515	1.27326	0.691071	1.15529	1.40258	0.769304
WNT100	1	328	1.13463	1.44377	0.800834	1.08705	1.36504	0.737992	1.1822	1.52249	0.863676
WNT100	1.08333	321	1.14403	1.48708	0.812299	1.10018	1.40529	0.750315	1.18789	1.56887	0.874284
WNT100	1.16667	317	1.14163	1.52085	0.855559	1.09527	1.44203	0.778468	1.18798	1.59967	0.93265
WNT100	1.25	314	1.15788	1.60366	0.884917	1.11149	1.52567	0.820455	1.20428	1.68165	0.949378
WNT100	1.33333	321	1.2401	1.6592	0.832973	1.19231	1.5784	0.767547	1.2879	1.74	0.898398
WNT100	1.41667	315	1.20545	1.68982	0.913797	1.15883	1.60752	0.824995	1.25207	1.77212	1.0026
WNT100	1.5	309	1.27209	1.72175	0.841384	1.22552	1.65014	0.792578	1.31866	1.79336	0.890191
WNT100	1.58333	322	1.25559	1.83607	0.921612	1.20881	1.75036	0.861023	1.30238	1.92177	0.9822
WNT100	1.66667	323	1.2704	1.88121	0.93756	1.22505	1.79898	0.864812	1.31575	1.96344	1.01031
WNT100	1.75	329	1.27394	2.03879	1.10475	1.22304	1.85745	0.872027	1.32484	2.22012	1.33747
WNT100	1.83333	321	1.30071	1.96583	0.975941	1.24873	1.88522	0.892483	1.35268	2.04643	1.0594
WNT100	1.91667	326	1.31429	2.10755	1.06552	1.26714	1.92665	0.892346	1.36144	2.28845	1.23869
WNT100	2	324	1.3304	2.06609	0.984618	1.27432	1.98115	0.912773	1.38647	2.15103	1.05646
WNT100	2.08333	331	1.36745	2.13472	0.986517	1.31974	2.03625	0.907051	1.41516	2.2332	1.06598
WNT100	2.16667	323	1.30992	2.24093	1.15289	1.25782	2.06137	0.99654	1.36202	2.42049	1.30924
WNT100	2.25	329	1.37821	2.27244	1.10542	1.32282	2.09299	0.917719	1.4336	2.45189	1.29313
WNT100	2.33333	330	1.40195	2.21806	1.00761	1.35274	2.13325	0.915299	1.45116	2.30287	1.09991
WNT100	2.41667	321	1.35178	2.27127	1.07638	1.30458	2.18119	0.985875	1.39898	2.36134	1.16689
WNT100	2.5	331	1.41194	2.34361	1.03417	1.36423	2.16061	0.923164	1.45965	2.52661	1.14518
WNT100	2.58333	326	1.39519	2.38113	1.12802	1.34516	2.24256	1.00558	1.44522	2.5197	1.25045
WNT100	2.66667	338	1.39383	2.42479	1.14613	1.3339	2.26022	1.04243	1.45376	2.58936	1.24983
WNT100	2.75	332	1.44827	2.43717	1.03964	1.39846	2.31908	0.964271	1.49808	2.55527	1.11501
WNT100	2.83333	339	1.4541	2.49993	1.12153	1.39737	2.32865	1.01026	1.51084	2.6712	1.23279
WNT100	2.91667	334	1.48458	2.54614	1.08217	1.43168	2.35317	0.951571	1.53747	2.73911	1.21277
WNT100	3	353	1.48321	2.55915	1.09772	1.4316	2.42002	1.00474	1.53482	2.69828	1.19071
WNT100	3.08333	340	1.51843	2.59171	1.04393	1.46596	2.467	0.979642	1.5709	2.71641	1.10822
WNT100	3.16667	337	1.55166	2.67971	1.10965	1.47896	2.48652	1.01221	1.62435	2.8729	1.2071
WNT100	3.25	337	1.53054	2.6553	1.14024	1.47548	2.48026	1.02536	1.58561	2.83034	1.25512
WNT100	3.33333	325	1.51804	2.63945	1.1162	1.46499	2.5157	1.01831	1.57109	2.7632	1.2141
WNT100	3.41667	332	1.60106	2.68059	1.04884	1.54296	2.57539	0.976772	1.65917	2.78579	1.12092
WNT100	3.5	338	1.60808	2.7535	1.1522	1.54476	2.60995	1.03485	1.67139	2.89706	1.26955
WNT100	3.58333	327	1.61378	2.76307	1.1575	1.54921	2.63726	1.04643	1.67835	2.88889	1.26857
WNT100	3.66667	327	1.65659	2.7648	0.996697	1.59964	2.62235	0.943253	1.71355	2.90724	1.05014
WNT100	3.75	339	1.67639	2.80741	1.03808	1.61379	2.66558	0.952726	1.73898	2.94923	1.12344
WNT100	3.83333	344	1.65641	2.84758	1.03535	1.60258	2.6967	0.978275	1.71024	2.99847	1.09242
WNT100	3.91667	341	1.66563	2.83615	1.09318	1.60966	2.689	0.973932	1.72159	2.9833	1.21244
WNT100	4	344	1.62157	2.83717	1.08965	1.56578	2.68546	1.00847	1.67735	2.98889	1.17084
WNT100	4.08333	338	1.69959	2.80686	0.989176	1.64322	2.71773	0.958726	1.75596	2.89599	1.01963
WNT100	4.16667	334	1.65777	2.89228	1.12057	1.59665	2.73726	0.991724	1.7189	3.0473	1.24942
WNT100	4.25	337	1.70686	2.97704	1.09632	1.64558	2.80302	0.986849	1.76813	3.15106	1.2058
WNT100	4.33333	334	1.72794	2.96006	1.08414	1.66524	2.79109	0.988777	1.79065	3.12903	1.17951
WNT100	4.41667	333	1.73609	3.01498	1.12769	1.67004	2.84529	1.00799	1.80214	3.18468	1.2474
WNT100	4.5	340	1.77801	3.01652	1.05295	1.69686	2.86623	0.991994	1.85915	3.16681	1.11391
WNT100	4.58333	339	1.73196	2.97931	1.18528	1.66259	2.82444	1.01304	1.80133	3.13418	1.35752
WNT100	4.66667	340	1.72556	2.99932	1.09112	1.66615	2.84879	1.01631	1.78496	3.14984	1.16594
WNT100	4.75	332	1.75728	2.95802	1.03827	1.69512	2.81542	0.973826	1.81945	3.10062	1.1027
WNT100	4.83333	333	1.77136	2.98571	1.04845	1.70635	2.83456	0.988577	1.83638	3.13686	1.10832
WNT100	4.91667	330	1.75765	2.97322	1.06482	1.69213	2.83099	0.991859	1.82317	3.11546	1.13778
WNT100	5	333	1.74887	2.97722	1.09666	1.68302	2.83849	0.98368	1.81472	3.11595	1.20965
WNT100	5.08333	334	1.75993	2.96019	1.05227	1.69874	2.82204	0.954545	1.82113	3.09834	1.15
WNT100	5.16667	336	1.72755	2.97052	1.09353	1.66603	2.82236	1.01041	1.78907	3.11868	1.17666
WNT100	5.25	347	1.75985	2.98494	1.03361	1.70175	2.83626	0.95654	1.81795	3.13361	1.11068
WNT100	5.33333	336	1.77	3.0197	1.09082	1.69948	2.86014	0.999308	1.84053	3.17926	1.18234
WNT100	5.41667	341	1.76066	3.02952	1.18482	1.69423	2.87098	1.04979	1.82709	3.18806	1.31984
WNT100	5.5	331	1.69834	3.08387	1.26125	1.63128	2.92746	1.10288	1.7654	3.24029	1.41962
WNT100	5.58333	339	1.74833	3.06755	1.12308	1.67924	2.91573	1.02803	1.81741	3.21937	1.21812
WNT100	5.66667	336	1.7414	3.06923	1.14758	1.6752	2.91655	1.03146	1.80761	3.22191	1.26369
WNT100	5.75	336	1.76651	3.08134	1.2072	1.68754	2.92513	1.07217	1.84549	3.23756	1.34223
WNT100	5.83333	334	1.81821	3.10628	1.11739	1.74724	2.94538	1.0237	1.88918	3.26718	1.21108
WNT100	5.91667	335	1.81014	3.09416	1.06621	1.74287	2.9363	0.995395	1.87741	3.25201	1.13703
WNT100	6	337	1.77347	3.09886	1.13511	1.70712	2.93652	1.02296	1.83982	3.26119	1.24726
WNT100	6.08333	343	1.7836	3.0683	1.04783	1.7243	2.91678	0.980925	1.8429	3.21982	1.11473
WNT100	6.16667	342	1.76992	3.05895	1.03713	1.70827	2.90599	0.985714	1.83157	3.21191	1.08854
WNT100	6.25	349	1.81596	3.10529	1.02953	1.75397	2.9654	0.986762	1.87796	3.24519	1.07229
WNT100	6.33333	353	1.76174	3.01657	1.09214	1.70036	2.88339	1.0143	1.82312	3.14974	1.16999
WNT100	6.41667	364	1.7619	3.03391	1.08777	1.70073	2.90606	1.02218	1.82307	3.16176	1.15336
WNT100	6.5	354	1.81188	3.08754	1.0846	1.73812	2.94892	1.01735	1.88564	3.22617	1.15185
WNT100	6.58333	347	1.78636	3.05102	1.08481	1.72267	2.91022	1.00773	1.85004	3.19181	1.16189
WNT100	6.66667	354	1.77399	3.0026	1.05532	1.70212	2.86258	1.00085	1.84586	3.14262	1.1098
WNT100	6.75	342	1.75343	2.97401	1.05628	1.68632	2.8283	0.990572	1.82053	3.11972	1.12199
WNT100	6.83333	343	1.79153	2.9224	1.00913	1.72637	2.79223	0.951924	1.85669	3.05257	1.06634
WNT100	6.91667	355	1.80624	2.92592	0.998607	1.73277	2.79889	0.951164	1.87971	3.05296	1.04605
WNT100	7	345	1.76796	2.99414	1.07387	1.6951	2.85642	1.00086	1.84082	3.13185	1.14689
WNT100	7.08333	349	1.77291	3.01503	1.05827	1.70538	2.87493	0.986874	1.84043	3.15512	1.12967
WNT100	7.16667	348	1.79256	3.00495	1.01249	1.72253	2.86367	0.955087	1.86259	3.14624	1.0699
WNT100	7.25	344	1.74588	2.9591	1.02413	1.6819	2.82085	0.964898	1.80986	3.09734	1.08335
WNT100	7.33333	346	1.76075	2.9731	1.03385	1.69652	2.8371	0.967189	1.82498	3.1091	1.10052
WNT100	7.41667	347	1.77618	2.98592	1.01139	1.70956	2.84508	0.965402	1.84279	3.12677	1.05738
WNT100	7.5	340	1.79884	2.98694	0.997325	1.72159	2.84598	0.952901	1.87609	3.1279	1.04175
WNT100	7.58333	349	1.72958	2.97141	1.07353	1.66165	2.82047	1.00738	1.79751	3.12235	1.13967
WNT100	7.66667	334	1.70086	2.96768	1.09538	1.63772	2.81642	0.976223	1.76401	3.11894	1.21454
WNT100	7.75	347	1.72503	2.95991	1.04618	1.65417	2.8102	0.996015	1.79589	3.10962	1.09634
WNT100	7.83333	341	1.71733	2.95417	1.01979	1.65484	2.79961	0.978376	1.77982	3.10873	1.06119
WNT100	7.91667	352	1.68431	2.90553	1.14746	1.61911	2.76442	1.02742	1.7495	3.04663	1.26751
WNT100	8	344	1.73146	2.86434	1.0155	1.66682	2.71568	0.950713	1.7961	3.013	1.08029
WNT100	8.08333	339	1.74656	2.91946	1.05424	1.67722	2.75952	0.97361	1.8159	3.07939	1.13486
WNT100	8.16667	352	1.71551	2.84423	1.06356	1.64713	2.69557	0.959705	1.7839	2.99289	1.16742
WNT100	8.25	351	1.69307	2.83283	1.01844	1.6304	2.68882	0.964376	1.75573	2.97683	1.07251
WNT100	8.33333	353	1.7101	2.87047	1.0536	1.64489	2.72097	0.973767	1.77532	3.01997	1.13344
WNT100	8.41667	354	1.72365	2.84286	1.04526	1.65803	2.68983	0.962224	1.78926	2.9959	1.1283
WNT100	8.5	353	1.66889	2.82256	1.0764	1.60422	2.67277	0.978281	1.73355	2.97236	1.17453
WNT100	8.58333	355	1.70278	2.81441	1.02929	1.63737	2.66046	0.952957	1.76819	2.96835	1.10562
WNT100	8.66667	359	1.70195	2.8163	1.06114	1.63405	2.66653	0.97394	1.76986	2.96608	1.14835
WNT100	8.75	354	1.68422	2.85715	1.05044	1.62364	2.70279	0.949073	1.74479	3.0115	1.15181
WNT100	8.83333	351	1.68484	2.82875	1.03047	1.61995	2.66505	0.969882	1.74972	2.99244	1.09107
WNT100	8.91667	343	1.68167	2.81312	1.01044	1.6215	2.65501	0.946009	1.74184	2.97123	1.07486
WNT100	9	348	1.68818	2.76612	1.0184	1.62134	2.64944	0.953938	1.75501	2.88279	1.08287
WNT100	9.08333	348	1.67029	2.77074	1.07416	1.60345	2.63016	0.976251	1.73714	2.91132	1.17207
WNT100	9.16667	346	1.65311	2.74205	1.06948	1.59076	2.59558	0.917295	1.71546	2.88852	1.22166
WNT100	9.25	348	1.65347	2.75028	1.04542	1.5896	2.60178	0.954215	1.71734	2.89877	1.13663
WNT100	9.33333	350	1.63753	2.75305	1.12528	1.56988	2.59987	0.94245	1.70517	2.90622	1.3081
WNT100	9.41667	345	1.63313	2.73919	1.09645	1.57148	2.58632	0.930093	1.69479	2.89205	1.2628
WNT100	9.5	347	1.58253	2.6701	1.05258	1.51999	2.55554	0.988702	1.64508	2.78466	1.11646
WNT100	9.58333	340	1.59308	2.65578	1.02538	1.53086	2.53977	0.962994	1.6553	2.7718	1.08776
WNT100	9.66667	348	1.63458	2.66535	1.00419	1.57258	2.55299	0.94743	1.69658	2.77771	1.06096
WNT100	9.75	354	1.61576	2.67459	1.03189	1.55513	2.53963	0.945902	1.67639	2.80956	1.11789
WNT100	9.83333	349	1.6029	2.66789	1.01309	1.54332	2.5509	0.955025	1.66248	2.78488	1.07115
WNT100	9.91667	348	1.58171	2.60034	0.984613	1.52144	2.48798	0.946186	1.64197	2.7127	1.02304
WNT100	10	345	1.60099	2.61305	1.00254	1.53937	2.49419	0.94313	1.66262	2.73191	1.06195
WNT100	10.0833	339	1.63421	2.6278	0.967131	1.57192	2.50978	0.924898	1.6965	2.74582	1.00936
WNT100	10.1667	341	1.58629	2.60732	1.00681	1.52305	2.48779	0.952282	1.64954	2.72684	1.06134
WNT100	10.25	358	1.56791	2.55897	1.0169	1.50385	2.44164	0.959078	1.63197	2.67629	1.07473
WNT100	10.3333	346	1.58782	2.62992	1.01615	1.52299	2.46322	0.92956	1.65265	2.79662	1.10274
WNT100	10.4167	350	1.57646	2.58895	1.02789	1.51248	2.42587	0.919076	1.64044	2.75203	1.13671
WNT100	10.5	343	1.56968	2.4957	0.975347	1.50461	2.37946	0.923867	1.63475	2.61193	1.02683
WNT100	10.5833	350	1.59473	2.55668	0.963698	1.53433	2.44048	0.911455	1.65513	2.67287	1.01594
WNT100	10.6667	351	1.58172	2.54046	0.959325	1.52396	2.42354	0.918137	1.63948	2.65738	1.00051
WNT100	10.75	350	1.57292	2.54671	0.991536	1.50715	2.42811	0.940697	1.63869	2.66531	1.04238
WNT100	10.8333	349	1.55062	2.50282	1.02756	1.49006	2.38839	0.946639	1.61118	2.61725	1.10847
WNT100	10.9167	352	1.59368	2.52963	0.942188	1.53551	2.41244	0.901516	1.65185	2.64683	0.982859
WNT100	11	346	1.56015	2.52092	0.983183	1.49906	2.40421	0.931442	1.62124	2.63762	1.03492
WNT100	11.0833	343	1.56462	2.53028	1.00214	1.49946	2.41193	0.94282	1.62979	2.64863	1.06146
WNT100	11.1667	349	1.54278	2.50407	0.986435	1.48307	2.38504	0.932116	1.60249	2.62311	1.04075
WNT100	11.25	353	1.563	2.49728	0.943585	1.50437	2.37641	0.904738	1.62163	2.61815	0.982433
WNT100	11.3333	338	1.56284	2.48228	0.981307	1.49917	2.36288	0.912956	1.6265	2.60168	1.04966
WNT100	11.4167	346	1.54663	2.46854	0.940454	1.48916	2.34965	0.903197	1.6041	2.58743	0.977711
WNT100	11.5	340	1.56812	2.48639	0.938403	1.50731	2.3653	0.898362	1.62893	2.60747	0.978445
WNT100	11.5833	337	1.55018	2.44529	0.948249	1.48737	2.32225	0.899897	1.613	2.56834	0.996601
WNT100	11.6667	337	1.54752	2.43395	0.944849	1.48496	2.31357	0.901029	1.61007	2.55433	0.988669
WNT100	11.75	349	1.55917	2.46035	0.978967	1.49557	2.33902	0.88461	1.62278	2.58168	1.07332
WNT100	11.8333	352	1.57796	2.47407	0.96639	1.50876	2.3517	0.910307	1.64717	2.59644	1.02247
WNT100	11.9167	345	1.51927	2.46311	1.02099	1.45389	2.34099	0.946511	1.58465	2.58523	1.09547
WNT100	12	339	1.53682	2.46591	0.982292	1.46633	2.34023	0.927322	1.60731	2.59159	1.03726
DMSO	-0.583333	279	1.00543	1.0145	0.742926	0.941128	0.93692	0.632427	1.06972	1.09208	0.853426
DMSO	-0.5	282	1.03703	0.989632	0.674828	0.995182	0.913168	0.582154	1.07889	1.0661	0.767503
DMSO	-0.416667	282	0.985898	0.977547	0.750227	0.942828	0.905827	0.612255	1.02897	1.04927	0.888199
DMSO	-0.333333	285	1.01465	1.00832	0.706005	0.964898	0.928909	0.610097	1.0644	1.08772	0.801913
DMSO	-0.25	286	0.971864	1.02458	0.74971	0.927977	0.946302	0.626983	1.01575	1.10285	0.872438
DMSO	-0.166667	289	0.989543	0.98534	0.752668	0.938291	0.915174	0.612502	1.04079	1.05551	0.892835
DMSO	-0.0833333	190	0.994285	1.00025	0.882555	0.938337	0.91188	0.671252	1.05023	1.08862	1.09386
DMSO	0	296	1.01302	1.01294	0.673454	0.969859	0.934428	0.598927	1.05617	1.09144	0.747981
DMSO	0.0833333	287	0.985366	1.06031	0.787621	0.935892	0.982176	0.687779	1.03484	1.13844	0.887463
DMSO	0.166667	296	0.985757	1.04503	0.742787	0.940057	0.964265	0.649405	1.03146	1.12579	0.836169
DMSO	0.25	283	1.0457	1.02208	0.676666	0.996195	0.946626	0.596273	1.09521	1.09753	0.757058
DMSO	0.333333	293	1.051	1.05227	0.703001	1.00216	0.981443	0.623476	1.09984	1.12311	0.782527
DMSO	0.416667	295	1.07175	1.02811	0.661609	1.01454	0.961438	0.59583	1.12896	1.09478	0.727389
DMSO	0.5	297	1.00681	1.05469	0.728659	0.958992	0.984781	0.658542	1.05462	1.1246	0.798776
DMSO	0.583333	299	1.01142	1.06039	0.777635	0.95368	0.987229	0.661254	1.06916	1.13356	0.894016
DMSO	0.666667	295	1.03229	1.05112	0.666739	0.990956	0.97616	0.614588	1.07363	1.12609	0.71889
DMSO	0.75	294	1.00104	1.02472	0.690393	0.961016	0.956814	0.622657	1.04107	1.09263	0.758128
DMSO	0.833333	291	1.01036	1.00995	0.723348	0.966324	0.941486	0.62504	1.05439	1.07842	0.821655
DMSO	0.916667	297	1.00042	1.02208	0.68119	0.962283	0.950599	0.612214	1.03856	1.09356	0.750166
DMSO	1	298	0.996819	1.05754	0.792326	0.950958	0.985854	0.683958	1.04268	1.12923	0.900693
DMSO	1.08333	301	0.98845	1.03429	0.777797	0.945916	0.961476	0.67968	1.03098	1.10711	0.875914
DMSO	1.16667	303	1.09612	0.986408	0.644477	1.0263	0.925454	0.586057	1.16594	1.04736	0.702898
DMSO	1.25	303	1.05242	1.03773	0.682663	1.00357	0.963636	0.60942	1.10128	1.11182	0.755905
DMSO	1.33333	308	1.08845	1.02757	0.623489	1.04004	0.95665	0.579555	1.13687	1.09849	0.667424
DMSO	1.41667	290	1.02119	0.979541	0.676047	0.970733	0.911731	0.609457	1.07165	1.04735	0.742637
DMSO	1.5	298	1.07784	0.993378	0.62306	1.02481	0.931739	0.576562	1.13087	1.05502	0.669558
DMSO	1.58333	309	1.06317	1.02182	0.683338	1.01507	0.956765	0.608102	1.11127	1.08687	0.758574
DMSO	1.66667	303	1.03247	1.01848	0.664952	0.989662	0.949397	0.609731	1.07529	1.08756	0.720172
DMSO	1.75	304	1.09428	0.999885	0.615131	1.04355	0.937315	0.567342	1.14502	1.06246	0.66292
DMSO	1.83333	321	1.05586	0.982783	0.609362	1.01727	0.923957	0.566164	1.09444	1.04161	0.652561
DMSO	1.91667	314	1.0465	1.03153	0.689266	0.994426	0.96322	0.606552	1.09858	1.09984	0.771981
DMSO	2	318	1.00328	0.980364	0.712294	0.938643	0.919903	0.632946	1.06792	1.04083	0.791642
DMSO	2.08333	310	1.06405	1.00552	0.639742	1.012	0.937093	0.590244	1.1161	1.07395	0.689239
DMSO	2.16667	322	1.00166	0.996303	0.68551	0.957243	0.927387	0.605493	1.04607	1.06522	0.765528
DMSO	2.25	316	1.01139	0.915969	0.673316	0.961227	0.861171	0.588099	1.06155	0.970767	0.758532
DMSO	2.33333	313	1.03274	0.935643	0.658893	0.973314	0.874852	0.594001	1.09217	0.996433	0.723784
DMSO	2.41667	311	1.01634	0.955684	0.683312	0.962018	0.896111	0.596074	1.07067	1.01526	0.770549
DMSO	2.5	316	0.95785	0.938703	0.683639	0.911543	0.877074	0.620728	1.00416	1.00033	0.74655
DMSO	2.58333	334	0.971015	0.931923	0.715761	0.922023	0.871073	0.635325	1.02001	0.992772	0.796196
DMSO	2.66667	323	1.03069	0.932479	0.633008	0.979173	0.86915	0.576995	1.08221	0.995807	0.689022
DMSO	2.75	322	1.03796	0.936866	0.643115	0.993801	0.876079	0.57865	1.08211	0.997653	0.70758
DMSO	2.83333	315	1.02751	0.920877	0.673785	0.975143	0.864008	0.598542	1.07988	0.977747	0.749028
DMSO	2.91667	311	1.02122	0.928533	0.615918	0.97748	0.871167	0.56692	1.06496	0.9859	0.664915
DMSO	3	312	1.00288	0.934636	0.637164	0.961274	0.877019	0.584329	1.04448	0.992254	0.689998
DMSO	3.08333	315	0.998271	0.94134	0.718515	0.952663	0.879041	0.599751	1.04388	1.00364	0.837278
DMSO	3.16667	315	0.986442	0.942808	0.677339	0.943234	0.87856	0.5805	1.02965	1.00706	0.774177
DMSO	3.25	315	1.02656	0.91456	0.648325	0.964138	0.856423	0.576357	1.08899	0.972697	0.720294
DMSO	3.33333	318	1.04635	0.920095	0.589236	0.984812	0.857896	0.545644	1.10789	0.982295	0.632828
DMSO	3.41667	309	1.05169	0.891935	0.616161	0.991176	0.83449	0.551413	1.1122	0.94938	0.680909
DMSO	3.5	312	0.954718	0.90082	0.661462	0.913821	0.843796	0.593977	0.995615	0.957844	0.728947
DMSO	3.58333	315	0.989005	0.896425	0.625262	0.944967	0.83776	0.568151	1.03304	0.955089	0.682373
DMSO	3.66667	304	0.995123	0.911073	0.642958	0.948928	0.845034	0.568738	1.04132	0.977111	0.717179
DMSO	3.75	316	0.961818	0.943303	0.720471	0.916541	0.876799	0.623874	1.0071	1.00981	0.817067
DMSO	3.83333	316	0.954363	0.92358	0.676394	0.909513	0.859618	0.607901	0.999213	0.987542	0.744888
DMSO	3.91667	315	0.953077	0.914699	0.646707	0.90981	0.853454	0.586705	0.996344	0.975945	0.70671
DMSO	4	315	1.0213	0.951422	0.647031	0.965835	0.88032	0.582946	1.07677	1.02253	0.711116
DMSO	4.08333	319	0.9503	0.926368	0.700283	0.909678	0.86079	0.612876	0.990922	0.991947	0.787689
DMSO	4.16667	315	1.01365	0.907748	0.590223	0.972677	0.844619	0.542542	1.05462	0.970878	0.637903
DMSO	4.25	314	0.94388	0.89191	0.699647	0.898131	0.832083	0.590907	0.989629	0.951737	0.808388
DMSO	4.33333	326	0.982897	0.917157	0.691149	0.93888	0.851944	0.574588	1.02691	0.982371	0.80771
DMSO	4.41667	328	0.936668	0.888546	0.638888	0.893943	0.827265	0.57918	0.979393	0.949827	0.698597
DMSO	4.5	334	0.997672	0.92746	0.642652	0.953839	0.862438	0.581944	1.04151	0.992482	0.70336
DMSO	4.58333	327	0.970266	0.894723	0.699447	0.916522	0.837014	0.596114	1.02401	0.952433	0.80278
DMSO	4.66667	327	0.962231	0.88145	0.622528	0.914593	0.827466	0.568087	1.00987	0.935433	0.676969
DMSO	4.75	326	0.966347	0.897385	0.705583	0.917081	0.839487	0.597457	1.01561	0.955284	0.813708
DMSO	4.83333	335	0.986114	0.900392	0.705853	0.935736	0.843187	0.597965	1.03649	0.957596	0.813742
DMSO	4.91667	334	0.943309	0.893816	0.704517	0.900674	0.83409	0.61092	0.985944	0.953542	0.798115
DMSO	5	324	0.956276	0.888604	0.703256	0.90782	0.830434	0.587265	1.00473	0.946773	0.819247
DMSO	5.08333	324	0.936355	0.868767	0.651125	0.898866	0.815672	0.582081	0.973844	0.921862	0.720168
DMSO	5.16667	339	0.950117	0.899458	0.655596	0.910426	0.836672	0.584772	0.989808	0.962244	0.72642
DMSO	5.25	332	0.9165	0.874428	0.632279	0.881768	0.815682	0.57748	0.951231	0.933174	0.687079
DMSO	5.33333	348	0.92331	0.860661	0.714972	0.880229	0.807628	0.615059	0.966391	0.913694	0.814884
DMSO	5.41667	336	0.975566	0.86439	0.665079	0.916083	0.810492	0.58654	1.03505	0.918288	0.743618
DMSO	5.5	335	0.937835	0.850725	0.668246	0.893519	0.797392	0.59062	0.982151	0.904058	0.745873
DMSO	5.58333	355	0.932498	0.868279	0.693358	0.895275	0.809114	0.603308	0.969721	0.927444	0.783409
DMSO	5.66667	345	0.914506	0.868227	0.692025	0.874597	0.803181	0.594135	0.954415	0.933273	0.789916
DMSO	5.75	347	0.949428	0.857097	0.685329	0.901099	0.800457	0.588977	0.997756	0.913737	0.78168
DMSO	5.83333	344	0.883379	0.869893	0.694274	0.848404	0.812582	0.614475	0.918355	0.927204	0.774073
DMSO	5.91667	336	0.888804	0.844575	0.674183	0.854496	0.788583	0.588048	0.923113	0.900567	0.760318
DMSO	6	334	0.91758	0.839655	0.599874	0.880414	0.779724	0.554708	0.954746	0.899586	0.64504
DMSO	6.08333	340	0.907641	0.8365	0.623092	0.865594	0.781034	0.573114	0.949688	0.891965	0.673069
DMSO	6.16667	340	0.91727	0.831026	0.637113	0.870152	0.774395	0.574447	0.964389	0.887656	0.699779
DMSO	6.25	344	0.928289	0.803832	0.637993	0.887208	0.756261	0.556799	0.969369	0.851403	0.719187
DMSO	6.33333	349	0.913679	0.829612	0.641249	0.879412	0.777586	0.569062	0.947946	0.881637	0.713435
DMSO	6.41667	335	0.896076	0.822857	0.66536	0.853898	0.770613	0.595438	0.938254	0.875101	0.735282
DMSO	6.5	334	0.916899	0.824755	0.595265	0.881815	0.770854	0.549908	0.951983	0.878656	0.640621
DMSO	6.58333	324	0.919847	0.835245	0.599598	0.882247	0.775244	0.55131	0.957448	0.895245	0.647887
DMSO	6.66667	328	0.898791	0.801144	0.618069	0.863565	0.750264	0.553058	0.934018	0.852024	0.683079
DMSO	6.75	314	0.896549	0.790229	0.624392	0.859	0.74042	0.555906	0.934097	0.840037	0.692877
DMSO	6.83333	325	0.86607	0.784335	0.6484	0.832971	0.73361	0.565415	0.899169	0.835059	0.731385
DMSO	6.91667	335	0.870137	0.801184	0.613852	0.835507	0.750757	0.56475	0.904766	0.851612	0.662955
DMSO	7	326	0.870191	0.785577	0.666617	0.834326	0.73441	0.571675	0.906055	0.836743	0.76156
DMSO	7.08333	331	0.88815	0.784817	0.651974	0.846021	0.73491	0.559221	0.930279	0.834723	0.744727
DMSO	7.16667	336	0.849146	0.787328	0.64821	0.815394	0.736419	0.575814	0.882898	0.838237	0.720606
DMSO	7.25	333	0.813249	0.781516	0.707813	0.779931	0.732758	0.609172	0.846567	0.830274	0.806454
DMSO	7.33333	327	0.863193	0.799609	0.679496	0.824833	0.750483	0.591989	0.901552	0.848736	0.767002
DMSO	7.41667	327	0.877968	0.797552	0.683889	0.842005	0.748855	0.584136	0.913932	0.846249	0.783643
DMSO	7.5	325	0.870752	0.788208	0.653481	0.83842	0.740292	0.571864	0.903084	0.836123	0.735098
DMSO	7.58333	336	0.881334	0.78956	0.673874	0.844238	0.738895	0.565101	0.918431	0.840225	0.782646
DMSO	7.66667	341	0.894423	0.806652	0.681222	0.851273	0.750802	0.582399	0.937573	0.862503	0.780045
DMSO	7.75	330	0.891159	0.791181	0.578204	0.858893	0.742433	0.537662	0.923425	0.839929	0.618746
DMSO	7.83333	335	0.886753	0.785496	0.680306	0.853213	0.737198	0.57574	0.920292	0.833794	0.784873
DMSO	7.91667	337	0.888395	0.799841	0.58782	0.854735	0.750203	0.54522	0.922055	0.849479	0.63042
DMSO	8	335	0.885839	0.780628	0.583992	0.851045	0.72999	0.529325	0.920633	0.831266	0.638659
DMSO	8.08333	345	0.855208	0.767524	0.611507	0.822199	0.723191	0.565094	0.888217	0.811857	0.657921
DMSO	8.16667	344	0.880138	0.769537	0.642802	0.843413	0.724791	0.558588	0.916864	0.814282	0.727017
DMSO	8.25	342	0.910888	0.814427	0.6395	0.874224	0.759838	0.565197	0.947552	0.869017	0.713804
DMSO	8.33333	345	0.893047	0.803794	0.599167	0.858115	0.751325	0.555717	0.92798	0.856264	0.642616
DMSO	8.41667	351	0.856812	0.793485	0.610628	0.823245	0.73803	0.565428	0.890379	0.84894	0.655828
DMSO	8.5	346	0.890863	0.799326	0.59767	0.855915	0.739887	0.550238	0.925811	0.858765	0.645103
DMSO	8.58333	341	0.880077	0.780754	0.591505	0.842135	0.724181	0.543379	0.91802	0.837326	0.63963
DMSO	8.66667	342	0.902711	0.769343	0.571577	0.858609	0.71708	0.529699	0.946814	0.821607	0.613454
DMSO	8.75	341	0.859053	0.757714	0.62867	0.818349	0.708485	0.561606	0.899757	0.806944	0.695733
DMSO	8.83333	361	0.865644	0.807011	0.610766	0.831544	0.748852	0.564025	0.899744	0.865171	0.657506
DMSO	8.91667	359	0.847011	0.797698	0.630571	0.813438	0.736312	0.576245	0.880583	0.859084	0.684897
DMSO	9	355	0.912011	0.77664	0.637842	0.853629	0.723256	0.564256	0.970392	0.830024	0.711428
DMSO	9.08333	364	0.813105	0.783331	0.710242	0.778122	0.72955	0.618407	0.848089	0.837112	0.802078
DMSO	9.16667	357	0.874378	0.794369	0.625074	0.826853	0.740489	0.555817	0.921903	0.848249	0.694331
DMSO	9.25	362	0.872749	0.754144	0.595562	0.833448	0.708094	0.54165	0.91205	0.800193	0.649474
DMSO	9.33333	360	0.866732	0.734521	0.595425	0.830354	0.690766	0.526116	0.903111	0.778275	0.664734
DMSO	9.41667	359	0.877478	0.725327	0.583825	0.838013	0.680635	0.529481	0.916943	0.770019	0.638169
DMSO	9.5	372	0.868083	0.733327	0.568231	0.831864	0.689068	0.526167	0.904303	0.777586	0.610295
DMSO	9.58333	367	0.839169	0.741432	0.625097	0.795043	0.697791	0.56768	0.883296	0.785073	0.682513
DMSO	9.66667	368	0.854937	0.756565	0.646163	0.818071	0.711034	0.574699	0.891803	0.802096	0.717627
DMSO	9.75	371	0.835273	0.754291	0.641759	0.801296	0.709954	0.580899	0.86925	0.798628	0.70262
DMSO	9.83333	377	0.848298	0.719811	0.605414	0.815505	0.679166	0.545302	0.88109	0.760455	0.665526
DMSO	9.91667	382	0.834605	0.725042	0.60698	0.800795	0.680833	0.554552	0.868415	0.769251	0.659408
DMSO	10	371	0.807519	0.714877	0.615067	0.774777	0.673321	0.558462	0.84026	0.756433	0.671672
DMSO	10.0833	366	0.845403	0.713314	0.586783	0.810988	0.670945	0.536291	0.879817	0.755684	0.637275
DMSO	10.1667	366	0.852773	0.709079	0.58606	0.81504	0.666594	0.530322	0.890506	0.751564	0.641798
DMSO	10.25	365	0.864214	0.683948	0.554675	0.829423	0.644514	0.506958	0.899004	0.723381	0.602391
DMSO	10.3333	376	0.793293	0.707219	0.600198	0.762508	0.667674	0.55759	0.824079	0.746763	0.642806
DMSO	10.4167	370	0.858895	0.716814	0.571733	0.819518	0.67363	0.529725	0.898272	0.759997	0.613741
DMSO	10.5	381	0.86103	0.70381	0.574069	0.825229	0.661725	0.524228	0.896831	0.745895	0.62391
DMSO	10.5833	378	0.865042	0.722911	0.59412	0.828432	0.680017	0.535385	0.901653	0.765805	0.652855
DMSO	10.6667	369	0.830059	0.721681	0.582045	0.801613	0.677536	0.541469	0.858505	0.765826	0.62262
DMSO	10.75	381	0.790444	0.703898	0.623212	0.761308	0.661935	0.556031	0.819581	0.745861	0.690393
DMSO	10.8333	376	0.815745	0.706513	0.608209	0.784269	0.662953	0.553093	0.847221	0.750074	0.663325
DMSO	10.9167	374	0.833072	0.721	0.593869	0.798158	0.677509	0.543877	0.867987	0.764492	0.643861
DMSO	11	371	0.791806	0.71804	0.628197	0.763595	0.673285	0.565735	0.820018	0.762795	0.690658
DMSO	11.0833	374	0.845154	0.732817	0.615142	0.810517	0.685339	0.553678	0.87979	0.780295	0.676605
DMSO	11.1667	372	0.8208	0.716806	0.617382	0.792016	0.673365	0.554455	0.849584	0.760246	0.680309
DMSO	11.25	389	0.80417	0.718612	0.621722	0.777585	0.675548	0.566935	0.830755	0.761677	0.676509
DMSO	11.3333	382	0.876488	0.728292	0.580855	0.809598	0.686993	0.540485	0.943378	0.76959	0.621225
DMSO	11.4167	377	0.784908	0.719314	0.60767	0.75993	0.677857	0.562552	0.809885	0.760771	0.652788
DMSO	11.5	384	0.835076	0.708212	0.558323	0.809336	0.667805	0.521853	0.860815	0.748619	0.594794
DMSO	11.5833	374	0.831354	0.719593	0.567174	0.800022	0.678437	0.534359	0.862687	0.760748	0.59999
DMSO	11.6667	383	0.824892	0.744523	0.602023	0.794244	0.699448	0.561243	0.855541	0.789598	0.642803
DMSO	11.75	380	0.773456	0.732436	0.648167	0.744231	0.6843	0.587719	0.802681	0.780572	0.708614
DMSO	11.8333	384	0.805633	0.744383	0.629105	0.77469	0.695672	0.576812	0.836576	0.793095	0.681399
DMSO	11.9167	391	0.812512	0.710429	0.611455	0.783978	0.668345	0.557707	0.841045	0.752514	0.665202
DMSO	12	400	0.77898	0.719963	0.617353	0.752201	0.676467	0.572859	0.805759	0.763458	0.661848
CHIR4	-0.583333	256	0.997993	0.993243	0.655284	0.946269	0.930206	0.581638	1.04972	1.05628	0.72893
CHIR4	-0.5	268	1.01514	0.999372	0.646586	0.971482	0.930131	0.563376	1.05879	1.06861	0.729795
CHIR4	-0.416667	269	1.02762	1.00489	0.637954	0.985905	0.937614	0.562167	1.06934	1.07217	0.713741
CHIR4	-0.333333	276	0.979904	0.990125	0.715772	0.937861	0.929108	0.591221	1.02195	1.05114	0.840322
CHIR4	-0.25	269	0.97484	1.01331	0.705251	0.935113	0.9447	0.584841	1.01457	1.08192	0.825661
CHIR4	-0.166667	268	1.02957	0.986286	0.616253	0.979359	0.923716	0.544042	1.07979	1.04886	0.688465
CHIR4	-0.0833333	166	0.960339	1.0205	0.816251	0.911966	0.942718	0.606657	1.00871	1.09827	1.02585
CHIR4	0	275	0.953476	1.02733	0.742507	0.900814	0.958297	0.658082	1.00614	1.09636	0.826932
CHIR4	0.0833333	277	0.979214	1.07148	0.713061	0.937796	1.00071	0.632104	1.02063	1.14224	0.794018
CHIR4	0.166667	282	1.01207	1.07378	0.688371	0.970652	1.00068	0.612903	1.0535	1.14687	0.76384
CHIR4	0.25	272	1.03619	1.11162	0.668296	0.983509	1.04345	0.625185	1.08886	1.1798	0.711406
CHIR4	0.333333	279	1.07361	1.17268	0.679988	0.991651	1.09695	0.636453	1.15557	1.24841	0.723522
CHIR4	0.416667	270	1.04072	1.22604	0.788095	0.99371	1.15207	0.680357	1.08774	1.30002	0.895834
CHIR4	0.5	268	1.05729	1.23594	0.786219	1.00895	1.17025	0.679202	1.10562	1.30163	0.893237
CHIR4	0.583333	282	1.04241	1.30928	0.79259	0.999929	1.23841	0.73573	1.08489	1.38015	0.849451
CHIR4	0.666667	267	1.11996	1.31026	0.735279	1.07013	1.24567	0.683414	1.1698	1.37486	0.787144
CHIR4	0.75	277	1.12659	1.39938	0.78663	1.07868	1.3231	0.72511	1.1745	1.47565	0.84815
CHIR4	0.833333	277	1.10255	1.4192	0.841924	1.05791	1.34185	0.765349	1.14718	1.49654	0.918499
CHIR4	0.916667	284	1.15171	1.48958	0.8064	1.10594	1.4117	0.744757	1.19749	1.56746	0.868042
CHIR4	1	287	1.11288	1.48547	0.863054	1.06896	1.41679	0.794327	1.15679	1.55416	0.93178
CHIR4	1.08333	285	1.17224	1.53693	0.801361	1.13193	1.46862	0.757054	1.21255	1.60524	0.845668
CHIR4	1.16667	289	1.17866	1.59606	0.870453	1.13499	1.52537	0.793589	1.22233	1.66676	0.947317
CHIR4	1.25	291	1.19603	1.62912	0.883676	1.14728	1.55995	0.806901	1.24479	1.6983	0.960451
CHIR4	1.33333	294	1.22169	1.70951	0.87442	1.17756	1.64092	0.815242	1.26582	1.77811	0.933598
CHIR4	1.41667	299	1.23121	1.78966	0.943507	1.17805	1.71856	0.873103	1.28437	1.86076	1.01391
CHIR4	1.5	285	1.28342	1.83716	0.925661	1.22381	1.77005	0.852937	1.34303	1.90426	0.998385
CHIR4	1.58333	288	1.26108	1.81928	0.954413	1.2117	1.75488	0.869512	1.31046	1.88368	1.03931
CHIR4	1.66667	296	1.29662	1.86783	0.971368	1.2365	1.80195	0.883691	1.35673	1.93371	1.05905
CHIR4	1.75	289	1.3072	1.90573	0.985287	1.24927	1.83948	0.89388	1.36514	1.97198	1.07669
CHIR4	1.83333	296	1.30629	1.94206	0.980515	1.25536	1.86865	0.894502	1.35722	2.01547	1.06653
CHIR4	1.91667	297	1.31812	2.00081	0.953273	1.26802	1.92749	0.881869	1.36823	2.07413	1.02468
CHIR4	2	299	1.31493	2.07614	0.978206	1.2665	1.99996	0.921192	1.36336	2.15232	1.03522
CHIR4	2.08333	297	1.37984	2.0696	0.899386	1.33136	2.00339	0.866443	1.42832	2.13582	0.932328
CHIR4	2.16667	297	1.33001	2.14564	1.05108	1.27597	2.07371	0.974856	1.38404	2.21757	1.12731
CHIR4	2.25	304	1.36093	2.17061	1.00934	1.30611	2.09365	0.935977	1.41575	2.24757	1.08271
CHIR4	2.33333	294	1.37746	2.19099	1.03035	1.31856	2.11511	0.945635	1.43635	2.26686	1.11506
CHIR4	2.41667	293	1.40401	2.2475	0.96331	1.3526	2.16333	0.920548	1.45541	2.33167	1.00607
CHIR4	2.5	286	1.39247	2.24542	0.975361	1.34267	2.16274	0.929151	1.44228	2.32809	1.02157
CHIR4	2.58333	291	1.39253	2.24745	0.993315	1.34129	2.16548	0.938444	1.44377	2.32942	1.04819
CHIR4	2.66667	300	1.38408	2.26635	1.10159	1.3301	2.18903	0.997971	1.43807	2.34368	1.20521
CHIR4	2.75	288	1.45992	2.33415	0.980614	1.40714	2.25514	0.930841	1.5127	2.41317	1.03039
CHIR4	2.83333	292	1.41335	2.31751	1.03929	1.36135	2.23651	0.96373	1.46534	2.39851	1.11485
CHIR4	2.91667	289	1.4492	2.35633	1.02812	1.39648	2.27461	0.955145	1.50191	2.43805	1.10109
CHIR4	3	287	1.49351	2.3677	0.992649	1.43127	2.28846	0.926763	1.55574	2.44693	1.05854
CHIR4	3.08333	294	1.4569	2.4368	1.10103	1.4049	2.35927	0.983695	1.5089	2.51433	1.21837
CHIR4	3.16667	296	1.4549	2.44278	1.21787	1.39712	2.36794	1.05278	1.51269	2.51762	1.38296
CHIR4	3.25	288	1.52028	2.48735	0.967913	1.47158	2.40543	0.931419	1.56898	2.56926	1.00441
CHIR4	3.33333	293	1.4899	2.50682	1.11472	1.42854	2.42524	1.01703	1.55126	2.5884	1.21242
CHIR4	3.41667	290	1.5232	2.5027	1.08154	1.4635	2.42318	0.994516	1.5829	2.58223	1.16856
CHIR4	3.5	291	1.55296	2.57329	1.03053	1.49729	2.49438	0.966465	1.60862	2.65219	1.0946
CHIR4	3.58333	291	1.52591	2.57937	1.12402	1.46747	2.50069	1.02829	1.58435	2.65805	1.21974
CHIR4	3.66667	295	1.53393	2.60856	1.10088	1.47748	2.52645	1.00883	1.59039	2.69067	1.19294
CHIR4	3.75	297	1.54241	2.6522	1.04492	1.4894	2.56542	0.997257	1.59542	2.73899	1.09259
CHIR4	3.83333	293	1.56826	2.66773	1.07283	1.51198	2.5832	1.00721	1.62454	2.75225	1.13844
CHIR4	3.91667	295	1.56454	2.73746	1.15463	1.50388	2.63448	1.04685	1.62519	2.84044	1.2624
CHIR4	4	295	1.5979	2.73533	1.13559	1.53526	2.64156	1.03176	1.66054	2.82909	1.23942
CHIR4	4.08333	286	1.58654	2.75873	1.16745	1.52684	2.66648	1.04349	1.64624	2.85098	1.29141
CHIR4	4.16667	288	1.62619	2.74856	1.13244	1.56491	2.65541	1.0185	1.68748	2.84172	1.24637
CHIR4	4.25	280	1.62388	2.8342	1.13015	1.56385	2.73219	1.03605	1.6839	2.93622	1.22424
CHIR4	4.33333	278	1.69172	2.80925	1.04326	1.62864	2.70673	0.953537	1.75481	2.91178	1.13298
CHIR4	4.41667	276	1.63387	2.83901	1.19136	1.56753	2.73908	1.06283	1.70021	2.93894	1.31988
CHIR4	4.5	279	1.69043	2.828	1.06717	1.62502	2.72974	0.985419	1.75584	2.92626	1.14893
CHIR4	4.58333	277	1.67123	2.86862	1.08907	1.60757	2.76411	0.991385	1.73488	2.97314	1.18675
CHIR4	4.66667	287	1.72715	2.87793	1.02799	1.66077	2.77165	0.959649	1.79354	2.9842	1.09634
CHIR4	4.75	285	1.642	2.87372	1.22618	1.57733	2.76801	1.05216	1.70667	2.97943	1.4002
CHIR4	4.83333	285	1.66479	2.86537	1.06128	1.60422	2.74996	0.979614	1.72536	2.98079	1.14295
CHIR4	4.91667	291	1.72984	2.83721	1.00923	1.66955	2.73312	0.94642	1.79012	2.9413	1.07204
CHIR4	5	293	1.68741	2.89762	1.22025	1.61695	2.78701	1.03225	1.75787	3.00823	1.40825
CHIR4	5.08333	292	1.72032	2.87836	1.05074	1.65684	2.77307	0.971494	1.78381	2.98365	1.12999
CHIR4	5.16667	293	1.6511	2.85791	1.19471	1.58964	2.75623	1.00389	1.71257	2.9596	1.38553
CHIR4	5.25	287	1.66304	2.85714	1.10133	1.59806	2.75672	1.0051	1.72802	2.95756	1.19757
CHIR4	5.33333	286	1.6434	2.85456	1.25869	1.57523	2.7528	1.07969	1.71158	2.95633	1.43769
CHIR4	5.41667	283	1.68077	2.86967	1.1974	1.61499	2.76146	1.0166	1.74656	2.97787	1.3782
CHIR4	5.5	286	1.6311	2.88038	1.26421	1.55811	2.77079	1.10407	1.70408	2.98997	1.42436
CHIR4	5.58333	283	1.71871	2.87451	1.10369	1.65391	2.7657	0.943864	1.78351	2.98333	1.26351
CHIR4	5.66667	292	1.68096	2.86532	1.2008	1.61052	2.7597	1.0347	1.75139	2.97095	1.36691
CHIR4	5.75	286	1.72444	2.81618	0.977797	1.66265	2.70805	0.931754	1.78624	2.92431	1.02384
CHIR4	5.83333	287	1.73312	2.88197	1.02583	1.66904	2.76918	0.963631	1.7972	2.99476	1.08804
CHIR4	5.91667	292	1.67566	2.86306	1.11175	1.60679	2.75355	1.02304	1.74452	2.97257	1.20046
CHIR4	6	290	1.67701	2.83705	1.15238	1.60471	2.72715	1.0341	1.7493	2.94694	1.27066
CHIR4	6.08333	284	1.65894	2.84622	1.13547	1.58347	2.73252	1.03487	1.73442	2.95993	1.23608
CHIR4	6.16667	278	1.65183	2.82322	1.10065	1.58347	2.70937	1.01766	1.72019	2.93707	1.18365
CHIR4	6.25	282	1.7031	2.80319	0.992775	1.63848	2.68926	0.945133	1.76772	2.91712	1.04042
CHIR4	6.33333	281	1.66053	2.81887	1.09465	1.59518	2.69871	1.00016	1.72588	2.93902	1.18914
CHIR4	6.41667	286	1.64816	2.82382	1.09243	1.58103	2.70592	1.01539	1.71529	2.94172	1.16948
CHIR4	6.5	274	1.69859	2.82141	1.06269	1.62824	2.7	0.97032	1.76893	2.94281	1.15506
CHIR4	6.58333	289	1.69128	2.83025	1.0617	1.62158	2.7135	0.988145	1.76099	2.947	1.13526
CHIR4	6.66667	272	1.64218	2.77778	1.14466	1.56779	2.65599	1.01871	1.71657	2.89957	1.27061
CHIR4	6.75	276	1.64897	2.78989	1.04741	1.58299	2.66697	0.979838	1.71494	2.91281	1.11498
CHIR4	6.83333	277	1.66413	2.82622	1.13042	1.58786	2.70052	1.03204	1.74039	2.95193	1.2288
CHIR4	6.91667	275	1.65164	2.8297	1.15786	1.57619	2.70446	1.04575	1.72709	2.95494	1.26997
CHIR4	7	287	1.67524	2.80753	1.09058	1.59833	2.68254	0.977818	1.75214	2.93251	1.20333
CHIR4	7.08333	292	1.6681	2.80883	1.11118	1.5911	2.68389	1.00446	1.74511	2.93377	1.21791
CHIR4	7.16667	285	1.62692	2.75408	1.05509	1.5569	2.62979	0.987479	1.69693	2.87837	1.1227
CHIR4	7.25	282	1.66593	2.81232	1.12834	1.58348	2.68379	1.01495	1.74838	2.94085	1.24174
CHIR4	7.33333	284	1.67743	2.82078	1.10081	1.60282	2.69084	0.989849	1.75203	2.95073	1.21178
CHIR4	7.41667	283	1.63006	2.80113	1.12479	1.55256	2.66927	1.02575	1.70756	2.933	1.22383
CHIR4	7.5	280	1.60921	2.77246	1.17726	1.53657	2.6437	1.03486	1.68184	2.90122	1.31966
CHIR4	7.58333	275	1.67263	2.71913	0.998669	1.59473	2.5851	0.93017	1.75054	2.85316	1.06717
CHIR4	7.66667	276	1.64932	2.7619	1.06319	1.57507	2.62868	0.965084	1.72356	2.89512	1.1613
CHIR4	7.75	287	1.64879	2.71504	1.06988	1.57281	2.58958	0.951205	1.72478	2.8405	1.18856
CHIR4	7.83333	292	1.65776	2.7431	1.00554	1.58355	2.61584	0.943054	1.73196	2.87036	1.06802
CHIR4	7.91667	287	1.64557	2.76827	1.03606	1.56998	2.63559	0.967579	1.72116	2.90095	1.10454
CHIR4	8	279	1.62296	2.75371	1.03927	1.54608	2.61404	0.963685	1.69984	2.89338	1.11486
CHIR4	8.08333	275	1.61204	2.75874	1.08868	1.5354	2.62432	0.999176	1.68868	2.89317	1.17818
CHIR4	8.16667	270	1.58289	2.69768	1.09886	1.50603	2.56068	0.990448	1.65974	2.83468	1.20728
CHIR4	8.25	274	1.60824	2.72543	1.06257	1.53229	2.5895	0.984367	1.68418	2.86137	1.14077
CHIR4	8.33333	272	1.60422	2.69646	1.00635	1.53086	2.55766	0.95032	1.67758	2.83527	1.06238
CHIR4	8.41667	276	1.60235	2.70065	1.06305	1.52221	2.56135	0.981357	1.6825	2.83996	1.14474
CHIR4	8.5	271	1.61505	2.68038	1.01911	1.53423	2.53771	0.949763	1.69587	2.82306	1.08846
CHIR4	8.58333	282	1.55229	2.68009	1.15478	1.47031	2.54004	1.03946	1.63428	2.82013	1.2701
CHIR4	8.66667	282	1.55333	2.61871	1.06943	1.47045	2.4809	0.996833	1.63621	2.75653	1.14203
CHIR4	8.75	283	1.58242	2.60678	1.01866	1.50018	2.46386	0.944954	1.66466	2.74971	1.09236
CHIR4	8.83333	291	1.54593	2.5985	1.052	1.46763	2.4631	0.990671	1.62424	2.73389	1.11333
CHIR4	8.91667	282	1.56169	2.60573	1.07475	1.47315	2.46042	0.977585	1.65024	2.75104	1.17192
CHIR4	9	286	1.57423	2.54702	1.02749	1.49053	2.40879	0.947881	1.65793	2.68525	1.10711
CHIR4	9.08333	282	1.55395	2.56652	1.0374	1.47015	2.41902	0.956373	1.63776	2.71401	1.11843
CHIR4	9.16667	287	1.53588	2.50907	1.07061	1.45255	2.37358	0.979412	1.61921	2.64456	1.16181
CHIR4	9.25	280	1.57169	2.48687	0.948962	1.49252	2.35089	0.904627	1.65086	2.62286	0.993297
CHIR4	9.33333	282	1.56675	2.46978	0.937145	1.49044	2.33327	0.895549	1.64306	2.60629	0.978741
CHIR4	9.41667	277	1.5763	2.5038	0.973559	1.49341	2.36092	0.919095	1.65919	2.64668	1.02802
CHIR4	9.5	282	1.52449	2.44137	0.985138	1.44678	2.30488	0.930848	1.6022	2.57785	1.03943
CHIR4	9.58333	281	1.52408	2.48315	1.04208	1.43959	2.34111	0.969901	1.60857	2.6252	1.11427
CHIR4	9.66667	276	1.55728	2.48542	1.00095	1.47314	2.34423	0.929224	1.64142	2.62661	1.07267
CHIR4	9.75	284	1.51899	2.44662	0.988009	1.44028	2.31144	0.932476	1.5977	2.5818	1.04354
CHIR4	9.83333	288	1.52398	2.46902	1.05772	1.44231	2.33313	0.954735	1.60565	2.60492	1.1607
CHIR4	9.91667	289	1.51871	2.44574	1.02697	1.43844	2.31084	0.951803	1.59899	2.58065	1.10213
CHIR4	10	296	1.4973	2.41787	1.03664	1.41814	2.2875	0.964364	1.57646	2.54823	1.10892
CHIR4	10.0833	284	1.58039	2.43952	0.951118	1.49606	2.30516	0.902563	1.66471	2.57388	0.999673
CHIR4	10.1667	299	1.5312	2.42756	1.00344	1.45406	2.29601	0.937942	1.60834	2.5591	1.06893
CHIR4	10.25	294	1.49153	2.43088	1.03036	1.41437	2.29715	0.950952	1.56868	2.56461	1.10978
CHIR4	10.3333	301	1.49795	2.39326	1.01429	1.41816	2.26264	0.94134	1.57775	2.52387	1.08724
CHIR4	10.4167	296	1.50782	2.38673	0.970264	1.43029	2.25176	0.914827	1.58534	2.52171	1.0257
CHIR4	10.5	297	1.51779	2.32985	0.942163	1.44136	2.19938	0.88979	1.59422	2.46032	0.994537
CHIR4	10.5833	287	1.51036	2.38241	0.986679	1.42774	2.24468	0.91948	1.59298	2.52015	1.05388
CHIR4	10.6667	298	1.52692	2.36319	0.954977	1.44846	2.23246	0.899945	1.60539	2.49393	1.01001
CHIR4	10.75	290	1.47886	2.37678	1.08136	1.39857	2.24397	0.982749	1.55915	2.5096	1.17997
CHIR4	10.8333	300	1.51546	2.39982	1.0316	1.43324	2.26748	0.945847	1.59768	2.53216	1.11736
CHIR4	10.9167	296	1.48345	2.34428	1.03697	1.40284	2.21262	0.951086	1.56406	2.47594	1.12286
CHIR4	11	289	1.47853	2.35725	1.00949	1.39785	2.22611	0.940076	1.5592	2.48838	1.0789
CHIR4	11.0833	294	1.49728	2.32822	0.949244	1.41788	2.19757	0.894957	1.57669	2.45888	1.00353
CHIR4	11.1667	304	1.42994	2.32865	1.02795	1.35454	2.19949	0.961521	1.50534	2.45782	1.09437
CHIR4	11.25	300	1.45548	2.32472	1.019	1.37841	2.19525	0.943872	1.53256	2.45419	1.09412
CHIR4	11.3333	295	1.45582	2.31317	0.982259	1.37713	2.17907	0.919036	1.53451	2.44726	1.04548
CHIR4	11.4167	296	1.43792	2.2887	1.02151	1.36036	2.15615	0.940652	1.51547	2.42126	1.10237
CHIR4	11.5	304	1.47024	2.28289	0.959821	1.39127	2.15569	0.895688	1.54922	2.41008	1.02395
CHIR4	11.5833	299	1.39493	2.27861	1.05204	1.32129	2.1483	0.967652	1.46857	2.40891	1.13642
CHIR4	11.6667	310	1.42737	2.30187	1.01027	1.35523	2.16909	0.934914	1.49951	2.43465	1.08562
CHIR4	11.75	308	1.37618	2.30004	1.06586	1.30406	2.16398	0.986343	1.44829	2.4361	1.14537
CHIR4	11.8333	301	1.44724	2.24065	0.922329	1.37548	2.10689	0.875601	1.51901	2.37442	0.969056
CHIR4	11.9167	302	1.42151	2.2367	0.95469	1.34983	2.108	0.900318	1.49318	2.36541	1.00906
CHIR4	12	311	1.41125	2.23154	0.943042	1.34264	2.10092	0.894081	1.47986	2.36217	0.992003
CHIR8	-0.583333	248	1.00432	1.08799	0.822348	0.952988	0.90541	0.647481	1.05564	1.27057	0.997214
CHIR8	-0.5	252	1.00968	1.00613	0.695741	0.957593	0.91302	0.5958	1.06177	1.09923	0.795681
CHIR8	-0.416667	247	0.987068	0.988992	0.730502	0.936036	0.896657	0.600728	1.0381	1.08133	0.860277
CHIR8	-0.333333	245	1.00418	0.965727	0.675476	0.95622	0.877194	0.563938	1.05214	1.05426	0.787014
CHIR8	-0.25	247	1.01539	0.956024	0.671807	0.958687	0.868964	0.543894	1.0721	1.04308	0.79972
CHIR8	-0.166667	245	0.996105	0.960639	0.740106	0.922641	0.874831	0.59712	1.06957	1.04645	0.883092
CHIR8	-0.0833333	166	0.974777	1.04974	0.867576	0.91896	0.928568	0.681524	1.03059	1.17091	1.05363
CHIR8	0	254	1.0072	0.979764	0.648064	0.940933	0.90628	0.568856	1.07346	1.05325	0.727273
CHIR8	0.0833333	247	1.00537	1.02791	0.645515	0.961106	0.938358	0.580535	1.04963	1.11747	0.710495
CHIR8	0.166667	255	1.03301	1.06859	0.688446	0.985577	0.959605	0.607421	1.08044	1.17757	0.769471
CHIR8	0.25	248	1.0677	1.05852	0.661496	1.02371	0.997223	0.576942	1.11169	1.11981	0.746051
CHIR8	0.333333	260	1.0833	1.10335	0.797607	1.02845	1.04449	0.653693	1.13814	1.1622	0.94152
CHIR8	0.416667	251	1.12253	1.13915	0.717246	1.068	1.08112	0.616243	1.17707	1.19717	0.818249
CHIR8	0.5	252	1.0963	1.19013	0.86026	1.039	1.13237	0.708042	1.15361	1.24789	1.01248
CHIR8	0.583333	256	1.07744	1.2826	0.84563	1.02859	1.21391	0.724226	1.12629	1.35129	0.967034
CHIR8	0.666667	251	1.15111	1.33147	0.935228	1.0845	1.26244	0.748554	1.21771	1.4005	1.1219
CHIR8	0.75	257	1.17417	1.35169	0.789601	1.1193	1.28213	0.70262	1.22904	1.42125	0.876582
CHIR8	0.833333	249	1.15286	1.42332	0.842812	1.10206	1.35848	0.746277	1.20366	1.48815	0.939346
CHIR8	0.916667	253	1.14731	1.4702	0.932271	1.09632	1.40605	0.785441	1.19829	1.53435	1.0791
CHIR8	1	257	1.15761	1.54553	0.874233	1.11583	1.46121	0.78222	1.19939	1.62984	0.966246
CHIR8	1.08333	261	1.20117	1.5866	0.936892	1.15225	1.51107	0.79828	1.2501	1.66212	1.0755
CHIR8	1.16667	261	1.20913	1.61373	0.978034	1.1612	1.54706	0.828374	1.25707	1.68039	1.12769
CHIR8	1.25	266	1.21244	1.7023	0.952445	1.16079	1.62691	0.868446	1.26408	1.77769	1.03645
CHIR8	1.33333	259	1.2585	1.75986	0.915119	1.21069	1.68094	0.82661	1.3063	1.83879	1.00363
CHIR8	1.41667	273	1.26904	1.83779	1.06105	1.21918	1.75505	0.898845	1.31889	1.92053	1.22325
CHIR8	1.5	268	1.2464	1.8807	1.14022	1.19641	1.78754	0.953072	1.2964	1.97386	1.32737
CHIR8	1.58333	270	1.26212	1.92285	1.21023	1.21122	1.84393	0.998024	1.31301	2.00178	1.42244
CHIR8	1.66667	269	1.30212	1.9781	1.06927	1.25286	1.90285	0.915886	1.35138	2.05336	1.22266
CHIR8	1.75	262	1.3281	2.01238	0.988992	1.2804	1.93245	0.899088	1.3758	2.09231	1.0789
CHIR8	1.83333	261	1.34388	2.09897	1.13912	1.29064	2.01762	0.977567	1.39711	2.18033	1.30067
CHIR8	1.91667	264	1.36683	2.12173	0.995627	1.30958	2.03292	0.929789	1.42407	2.21054	1.06146
CHIR8	2	257	1.3835	2.18572	0.987907	1.33134	2.10145	0.920632	1.43565	2.26999	1.05518
CHIR8	2.08333	262	1.37507	2.19155	1.15463	1.31493	2.1089	1.01086	1.4352	2.27419	1.2984
CHIR8	2.16667	268	1.37345	2.19075	1.04284	1.32357	2.113	0.960248	1.42332	2.2685	1.12544
CHIR8	2.25	259	1.36647	2.20579	1.24047	1.31041	2.12671	1.04371	1.42254	2.28488	1.43723
CHIR8	2.33333	261	1.38255	2.28957	1.24392	1.32663	2.20964	1.05266	1.43846	2.3695	1.43519
CHIR8	2.41667	264	1.39677	2.33257	1.21319	1.33772	2.24691	1.04998	1.45582	2.41823	1.37641
CHIR8	2.5	265	1.41591	2.34597	1.2488	1.36156	2.26468	1.04426	1.47027	2.42726	1.45333
CHIR8	2.58333	266	1.41965	2.39009	1.25055	1.35986	2.30255	1.08651	1.47944	2.47763	1.4146
CHIR8	2.66667	267	1.41738	2.43328	1.33941	1.35796	2.34458	1.14047	1.4768	2.52198	1.53836
CHIR8	2.75	271	1.46827	2.50714	1.15976	1.41323	2.41342	1.0441	1.52331	2.60085	1.27542
CHIR8	2.83333	260	1.50328	2.55265	1.05447	1.4525	2.45632	0.995589	1.55407	2.64898	1.11334
CHIR8	2.91667	260	1.49754	2.53527	1.24817	1.43785	2.43286	1.07966	1.55723	2.63768	1.41667
CHIR8	3	261	1.48179	2.57428	1.34159	1.41921	2.46894	1.15236	1.54437	2.67962	1.53083
CHIR8	3.08333	258	1.55108	2.6215	1.14664	1.49179	2.5182	1.03923	1.61038	2.7248	1.25405
CHIR8	3.16667	256	1.56578	2.6983	1.18739	1.50152	2.59638	1.0783	1.63005	2.80021	1.29647
CHIR8	3.25	265	1.58699	2.69969	1.26437	1.51674	2.59859	1.11413	1.65724	2.80078	1.41461
CHIR8	3.33333	268	1.60928	2.73613	1.13036	1.54763	2.63351	1.04455	1.67092	2.83875	1.21616
CHIR8	3.41667	260	1.60754	2.83701	1.25291	1.54429	2.73081	1.10254	1.67078	2.9432	1.40329
CHIR8	3.5	264	1.64624	2.90029	1.34255	1.58313	2.79562	1.12741	1.70935	3.00496	1.5577
CHIR8	3.58333	266	1.66375	2.92411	1.25936	1.60027	2.82061	1.10255	1.72724	3.0276	1.41617
CHIR8	3.66667	261	1.64657	2.89026	1.29931	1.5745	2.78465	1.12714	1.71864	2.99587	1.47149
CHIR8	3.75	264	1.68668	2.98442	1.33197	1.61887	2.87141	1.15001	1.75448	3.09744	1.51394
CHIR8	3.83333	265	1.68884	3.01447	1.31591	1.62255	2.88628	1.14878	1.75513	3.14266	1.48304
CHIR8	3.91667	265	1.70543	2.97187	1.3616	1.63109	2.85485	1.1826	1.77978	3.0889	1.5406
CHIR8	4	279	1.70551	3.04472	1.46475	1.62985	2.93556	1.25123	1.78117	3.15388	1.67827
CHIR8	4.08333	272	1.75022	3.02384	1.24755	1.67916	2.91024	1.1164	1.82127	3.13743	1.37871
CHIR8	4.16667	247	1.72038	3.11151	1.24684	1.64641	2.98892	1.1259	1.79435	3.23409	1.36778
CHIR8	4.25	266	1.76112	3.1368	1.2365	1.69087	3.01802	1.0829	1.83137	3.25558	1.39009
CHIR8	4.33333	262	1.78472	3.16634	1.41573	1.7016	3.05162	1.20819	1.86784	3.28106	1.62328
CHIR8	4.41667	261	1.84531	3.25217	1.30113	1.76413	3.12952	1.13162	1.92649	3.37483	1.47064
CHIR8	4.5	264	1.83242	3.21988	1.17705	1.75946	3.1013	1.07663	1.90538	3.33845	1.27747
CHIR8	4.58333	261	1.84967	3.29191	1.28171	1.77222	3.17241	1.14844	1.92713	3.41141	1.41499
CHIR8	4.66667	267	1.87945	3.25502	1.25494	1.79954	3.13417	1.12046	1.95936	3.37586	1.38941
CHIR8	4.75	260	1.85311	3.29658	1.31492	1.77684	3.17443	1.13318	1.92938	3.41874	1.49666
CHIR8	4.83333	264	1.84993	3.31878	1.39257	1.7647	3.19732	1.15493	1.93516	3.44023	1.6302
CHIR8	4.91667	262	1.87113	3.33259	1.30456	1.78665	3.20284	1.09263	1.9556	3.46235	1.51648
CHIR8	5	270	1.91274	3.42557	1.38318	1.82942	3.2979	1.17215	1.99606	3.55324	1.59422
CHIR8	5.08333	273	1.88945	3.40196	1.39851	1.8069	3.27032	1.17697	1.972	3.53361	1.62005
CHIR8	5.16667	262	1.94382	3.46719	1.40142	1.85241	3.32639	1.18484	2.03523	3.608	1.618
CHIR8	5.25	261	1.91804	3.48729	1.42234	1.8293	3.35334	1.2164	2.00679	3.62124	1.62828
CHIR8	5.33333	263	1.93239	3.47911	1.27206	1.85113	3.3456	1.12467	2.01364	3.61262	1.41944
CHIR8	5.41667	263	1.96713	3.50278	1.25374	1.88599	3.36836	1.11429	2.04827	3.6372	1.3932
CHIR8	5.5	276	1.94674	3.59588	1.254	1.86753	3.46128	1.11517	2.02595	3.73048	1.39282
CHIR8	5.58333	251	2.01273	3.64613	1.39101	1.92065	3.51107	1.16473	2.1048	3.78119	1.6173
CHIR8	5.66667	270	1.93447	3.57817	1.43631	1.84825	3.44047	1.1971	2.0207	3.71587	1.67552
CHIR8	5.75	272	1.96342	3.6563	1.56791	1.86829	3.52115	1.30279	2.05854	3.79145	1.83304
CHIR8	5.83333	262	2.05269	3.6522	1.20546	1.96626	3.51369	1.07069	2.13911	3.79071	1.34024
CHIR8	5.91667	256	2.05137	3.64467	1.28269	1.96413	3.50909	1.10989	2.1386	3.78025	1.4555
CHIR8	6	272	2.02228	3.63317	1.20027	1.93672	3.49245	1.09764	2.10785	3.77389	1.3029
CHIR8	6.08333	263	2.01542	3.64028	1.32346	1.92873	3.49901	1.12069	2.10211	3.78155	1.52624
CHIR8	6.16667	268	2.06023	3.70273	1.35912	1.96152	3.56208	1.17235	2.15894	3.84338	1.54589
CHIR8	6.25	255	2.0722	3.66354	1.22211	1.98676	3.51641	1.05592	2.15763	3.81067	1.38829
CHIR8	6.33333	263	2.03803	3.70735	1.42155	1.94547	3.56574	1.14991	2.13059	3.84896	1.6932
CHIR8	6.41667	265	2.05244	3.75175	1.44031	1.95544	3.60731	1.23228	2.14944	3.89619	1.64833
CHIR8	6.5	256	2.12894	3.77321	1.34075	2.03486	3.62417	1.12011	2.22301	3.92224	1.56139
CHIR8	6.58333	260	2.13882	3.81077	1.31661	2.04836	3.67309	1.13575	2.22928	3.94846	1.49748
CHIR8	6.66667	261	2.22681	3.90631	1.18991	2.13595	3.75283	1.06685	2.31766	4.05979	1.31296
CHIR8	6.75	267	2.1905	3.83448	1.12039	2.10288	3.69023	1.043	2.27812	3.97873	1.19778
CHIR8	6.83333	271	2.20113	3.85933	1.17613	2.11073	3.71336	1.07374	2.29153	4.0053	1.27853
CHIR8	6.91667	257	2.19239	3.82307	1.11027	2.10884	3.67704	1.02788	2.27593	3.96909	1.19266
CHIR8	7	259	2.14496	3.88321	1.27344	2.05833	3.72544	1.10845	2.2316	4.04097	1.43842
CHIR8	7.08333	260	2.16783	3.8975	1.15811	2.08474	3.74775	1.07152	2.25092	4.04726	1.24471
CHIR8	7.16667	255	2.17391	3.88598	1.28101	2.07997	3.72499	1.10101	2.26784	4.04696	1.46101
CHIR8	7.25	248	2.18144	3.89649	1.22352	2.09243	3.7473	1.06581	2.27045	4.04568	1.38122
CHIR8	7.33333	262	2.1825	3.88145	1.12887	2.09265	3.72888	1.04777	2.27234	4.03402	1.20998
CHIR8	7.41667	257	2.14759	3.92102	1.26174	2.06131	3.76965	1.09706	2.23387	4.07238	1.42642
CHIR8	7.5	260	2.18867	3.9034	1.31713	2.0877	3.74914	1.1184	2.28965	4.05765	1.51586
CHIR8	7.58333	260	2.16136	3.92345	1.25954	2.0585	3.76138	1.12543	2.26423	4.08552	1.39366
CHIR8	7.66667	263	2.20528	3.94646	1.21761	2.11237	3.79079	1.06988	2.29818	4.10212	1.36534
CHIR8	7.75	266	2.21462	3.94409	1.19954	2.12128	3.78551	1.08114	2.30795	4.10267	1.31795
CHIR8	7.83333	261	2.17997	3.87659	1.11134	2.09265	3.72014	1.03941	2.26728	4.03303	1.18328
CHIR8	7.91667	260	2.1913	3.9223	1.16636	2.10088	3.76345	1.07424	2.28171	4.08115	1.25848
CHIR8	8	267	2.23522	3.97867	1.24069	2.14044	3.82448	1.0764	2.33001	4.13287	1.40498
CHIR8	8.08333	259	2.20342	4.00492	1.18404	2.10603	3.83618	1.08821	2.3008	4.17366	1.27986
CHIR8	8.16667	251	2.20987	3.93582	1.22186	2.11162	3.78089	1.08576	2.30812	4.09075	1.35796
CHIR8	8.25	256	2.19575	4.01221	1.23776	2.10049	3.84864	1.10758	2.291	4.17577	1.36794
CHIR8	8.33333	265	2.22058	4.04499	1.29511	2.11861	3.87942	1.15719	2.32255	4.21056	1.43304
CHIR8	8.41667	263	2.20679	4.06516	1.44126	2.09858	3.88936	1.21907	2.315	4.24097	1.66345
CHIR8	8.5	262	2.2276	4.0528	1.24719	2.12711	3.88525	1.13185	2.32808	4.22035	1.36253
CHIR8	8.58333	272	2.19313	3.99091	1.30222	2.08835	3.82811	1.16451	2.2979	4.15371	1.43994
CHIR8	8.66667	264	2.27732	4.04938	1.22284	2.17302	3.88391	1.09869	2.38163	4.21485	1.34698
CHIR8	8.75	268	2.24588	4.12749	1.21081	2.14815	3.96277	1.11705	2.34361	4.29221	1.30457
CHIR8	8.83333	267	2.26155	4.05245	1.3068	2.15317	3.89319	1.15531	2.36994	4.2117	1.4583
CHIR8	8.91667	272	2.26438	4.05839	1.20335	2.16271	3.88815	1.07898	2.36604	4.22863	1.32772
CHIR8	9	268	2.21162	4.08181	1.37819	2.10367	3.90457	1.21228	2.31957	4.25904	1.5441
CHIR8	9.08333	267	2.23011	4.02441	1.23736	2.12019	3.84688	1.10773	2.34003	4.20195	1.36699
CHIR8	9.16667	264	2.25619	4.08571	1.19192	2.15366	3.90816	1.09344	2.35871	4.26327	1.2904
CHIR8	9.25	259	2.27285	4.1104	1.21098	2.16678	3.93509	1.0828	2.37891	4.2857	1.33917
CHIR8	9.33333	265	2.24558	4.08869	1.24464	2.14064	3.90964	1.11056	2.35052	4.26774	1.37873
CHIR8	9.41667	270	2.23609	4.06381	1.25195	2.13292	3.88795	1.12873	2.33926	4.23967	1.37517
CHIR8	9.5	269	2.25074	4.11211	1.32697	2.14372	3.94007	1.16205	2.35776	4.28416	1.4919
CHIR8	9.58333	275	2.19046	4.07222	1.34017	2.08749	3.89476	1.16653	2.29343	4.24968	1.51382
CHIR8	9.66667	257	2.26322	4.08825	1.23115	2.15474	3.90345	1.09903	2.37169	4.27305	1.36327
CHIR8	9.75	269	2.25945	4.11719	1.27795	2.15379	3.93357	1.12328	2.36511	4.3008	1.43262
CHIR8	9.83333	276	2.23633	4.05974	1.27485	2.13494	3.88054	1.11951	2.33772	4.23894	1.43019
CHIR8	9.91667	273	2.23756	4.07321	1.30598	2.12593	3.8887	1.14886	2.3492	4.25772	1.4631
CHIR8	10	264	2.30548	4.13603	1.19192	2.19488	3.95069	1.092	2.41609	4.32137	1.29185
CHIR8	10.0833	278	2.25619	4.07205	1.22134	2.16003	3.89818	1.10465	2.35234	4.24592	1.33802
CHIR8	10.1667	282	2.27506	4.05925	1.14926	2.17863	3.88108	1.07632	2.37149	4.23741	1.22221
CHIR8	10.25	284	2.30459	4.15299	1.1677	2.21312	3.97066	1.059	2.39606	4.33531	1.2764
CHIR8	10.3333	283	2.25405	4.10756	1.32694	2.14868	3.9254	1.1745	2.35941	4.28972	1.47938
CHIR8	10.4167	279	2.25894	4.14638	1.18813	2.15964	3.96191	1.0951	2.35824	4.33085	1.28116
CHIR8	10.5	283	2.33305	4.12329	1.20035	2.22935	3.94568	1.08933	2.43675	4.30091	1.31136
CHIR8	10.5833	285	2.33281	4.08241	1.19447	2.23226	3.90486	1.06092	2.43335	4.25995	1.32801
CHIR8	10.6667	295	2.2419	4.05708	1.24698	2.13919	3.8795	1.12004	2.34461	4.23467	1.37391
CHIR8	10.75	297	2.28361	4.13603	1.19761	2.18476	3.96291	1.10897	2.38245	4.30915	1.28626
CHIR8	10.8333	296	2.3464	4.16041	1.1473	2.24777	3.98493	1.05801	2.44503	4.33589	1.2366
CHIR8	10.9167	298	2.25658	4.09335	1.24113	2.15414	3.91819	1.126	2.35902	4.26851	1.35626
CHIR8	11	291	2.30339	4.1389	1.2864	2.19462	3.95479	1.13987	2.41216	4.32301	1.43293
CHIR8	11.0833	284	2.3581	4.14289	1.12255	2.25859	3.95627	1.05405	2.45761	4.3295	1.19105
CHIR8	11.1667	296	2.31269	4.13127	1.26651	2.20192	3.94486	1.12548	2.42347	4.31768	1.40753
CHIR8	11.25	283	2.29445	4.09576	1.25992	2.18169	3.91059	1.14562	2.40721	4.28092	1.37423
CHIR8	11.3333	293	2.2552	4.12949	1.22121	2.14996	3.94435	1.13469	2.36044	4.31464	1.30774
CHIR8	11.4167	292	2.30785	4.14524	1.2397	2.2013	3.959	1.09847	2.4144	4.33148	1.38094
CHIR8	11.5	289	2.30198	4.08671	1.16997	2.19539	3.90177	1.0872	2.40857	4.27164	1.25274
CHIR8	11.5833	281	2.34819	4.14622	1.13476	2.24295	3.95584	1.06058	2.45343	4.33659	1.20895
CHIR8	11.6667	288	2.34541	4.20455	1.13568	2.24486	4.00568	1.04742	2.44596	4.40341	1.22395
CHIR8	11.75	284	2.29462	4.21761	1.18211	2.19704	4.02628	1.08696	2.3922	4.40894	1.27725
CHIR8	11.8333	288	2.31858	4.19395	1.19557	2.21153	4.00356	1.08118	2.42562	4.38434	1.30996
CHIR8	11.9167	289	2.28304	4.16487	1.25651	2.17573	3.97567	1.12133	2.39035	4.35406	1.39168
CHIR8	12	284	2.30978	4.17446	1.17613	2.20153	3.98388	1.08987	2.41803	4.36504	1.26238

## Sheet: Figure 3 supplement 3
Treatment	time (hour)	number of cells (for this timepoint and treatment)	cytoplasmic intensity (mean)	nuclear intensity (mean)	cytoplasmic intensity (lower boundry 95%CI)	nuclear intensity (lower boundry 95%CI)	cytoplasmic intensity (upper boundry 95%CI)	nuclear intensity (upper boundry 95%CI)
BSA	-0.583333	88	0.00240522	0.00128028	0.00223995	0.00116069	0.0025705	0.00139988
BSA	-0.5	89	0.00262063	0.00136433	0.00242885	0.00119737	0.00281241	0.0015313
BSA	-0.416667	91	0.00256777	0.00136206	0.00238298	0.00120275	0.00275256	0.00152138
BSA	-0.333333	93	0.00250242	0.00133662	0.00231481	0.00119192	0.00269002	0.00148132
BSA	-0.25	92	0.00259534	0.00130937	0.00231432	0.0011755	0.00287636	0.00144323
BSA	-0.166667	92	0.00266006	0.00133337	0.00231823	0.00119921	0.00300189	0.00146754
BSA	-0.0833333	99	0.00237468	0.00133933	0.00219372	0.00121561	0.00255563	0.00146304
BSA	0	93	0.00254273	0.0012949	0.00234154	0.00116602	0.00274393	0.00142378
BSA	0.0833333	92	0.0025302	0.0013006	0.00233234	0.00115781	0.00272806	0.00144339
BSA	0.166667	91	0.00252884	0.00132141	0.00234251	0.00117821	0.00271518	0.00146461
BSA	0.25	92	0.00262168	0.0014371	0.00241865	0.00127499	0.0028247	0.00159921
BSA	0.333333	93	0.00255779	0.00150726	0.00231901	0.00132921	0.00279658	0.0016853
BSA	0.416667	89	0.0025964	0.00143557	0.00240692	0.00126607	0.00278589	0.00160508
BSA	0.5	88	0.00258135	0.00138421	0.00235553	0.00124399	0.00280718	0.00152442
BSA	0.583333	91	0.00246545	0.00138536	0.00228814	0.00124693	0.00264276	0.0015238
BSA	0.666667	90	0.00240392	0.00134894	0.00224965	0.00121686	0.00255819	0.00148102
BSA	0.75	89	0.00246897	0.0013595	0.00228687	0.0012365	0.00265107	0.0014825
BSA	0.833333	93	0.00236291	0.00135301	0.00222294	0.00122086	0.00250289	0.00148515
BSA	0.916667	93	0.00233079	0.00133174	0.00217059	0.00121383	0.002491	0.00144965
BSA	1	98	0.00241916	0.00144329	0.00222939	0.00129339	0.00260893	0.00159319
BSA	1.08333	94	0.00248713	0.00140254	0.00230457	0.0012675	0.00266969	0.00153758
BSA	1.16667	95	0.00250356	0.00152954	0.00230005	0.00136128	0.00270707	0.00169781
BSA	1.25	100	0.00250715	0.00149155	0.00230969	0.00132063	0.0027046	0.00166246
BSA	1.33333	89	0.00251903	0.0014618	0.00232282	0.00128678	0.00271524	0.00163682
BSA	1.41667	93	0.00256928	0.00140792	0.00239188	0.00124718	0.00274668	0.00156865
BSA	1.5	88	0.00243795	0.00135048	0.00226492	0.0012012	0.00261098	0.00149977
BSA	1.58333	92	0.0024764	0.00147648	0.00230413	0.00128096	0.00264867	0.001672
BSA	1.66667	95	0.00250095	0.00153122	0.00230415	0.00135394	0.00269775	0.00170851
BSA	1.75	94	0.00250529	0.00149318	0.00233112	0.00132496	0.00267947	0.00166139
BSA	1.83333	99	0.00256297	0.00155875	0.00237983	0.00138314	0.00274612	0.00173436
BSA	1.91667	92	0.00237873	0.0014977	0.0022274	0.0013336	0.00253005	0.0016618
BSA	2	94	0.00224561	0.00146326	0.00209081	0.00128576	0.0024004	0.00164075
BSA	2.08333	94	0.00235683	0.00146158	0.0021964	0.00129573	0.00251726	0.00162743
BSA	2.16667	95	0.00240118	0.00148157	0.00222543	0.00130561	0.00257692	0.00165753
BSA	2.25	92	0.00237477	0.00142627	0.00219439	0.00125568	0.00255516	0.00159685
BSA	2.33333	87	0.00226059	0.00138986	0.00210838	0.00122223	0.00241281	0.00155749
BSA	2.41667	98	0.00227299	0.00140487	0.00212012	0.00126698	0.00242586	0.00154276
BSA	2.5	92	0.00210457	0.00140857	0.00197746	0.00123848	0.00223169	0.00157867
BSA	2.58333	95	0.00220242	0.00135851	0.00207282	0.0011997	0.00233202	0.00151732
BSA	2.66667	98	0.00217401	0.00136522	0.002042	0.00121265	0.00230603	0.00151778
BSA	2.75	92	0.00221286	0.0013083	0.00206941	0.00117134	0.00235631	0.00144526
BSA	2.83333	94	0.00215796	0.00134471	0.00202187	0.00118825	0.00229406	0.00150118
BSA	2.91667	96	0.00213163	0.00132702	0.00200639	0.00117672	0.00225688	0.00147733
BSA	3	100	0.00222695	0.00132599	0.0020855	0.00117821	0.00236839	0.00147377
BSA	3.08333	100	0.00216065	0.00125185	0.00205068	0.00112361	0.00227063	0.00138008
BSA	3.16667	99	0.0022865	0.00132356	0.0021448	0.00117957	0.00242821	0.00146755
BSA	3.25	98	0.00216867	0.00127723	0.00200883	0.0011394	0.00232851	0.00141506
BSA	3.33333	95	0.00218792	0.00133977	0.00203944	0.00118452	0.0023364	0.00149502
BSA	3.41667	97	0.00226451	0.0013932	0.00211419	0.00121014	0.00241483	0.00157625
BSA	3.5	93	0.00221858	0.0013055	0.00209018	0.00115679	0.00234699	0.00145421
BSA	3.58333	98	0.00217912	0.0012774	0.00203451	0.00114171	0.00232373	0.00141309
BSA	3.66667	98	0.00215138	0.00135012	0.00202206	0.00117315	0.0022807	0.00152709
BSA	3.75	102	0.00223854	0.0014328	0.00208369	0.00123297	0.0023934	0.00163263
BSA	3.83333	100	0.00225879	0.00136623	0.00210522	0.00120425	0.00241236	0.00152821
BSA	3.91667	106	0.0022513	0.00137601	0.00209375	0.00122327	0.00240885	0.00152875
BSA	4	102	0.00228853	0.00130874	0.00213845	0.00118138	0.00243862	0.0014361
BSA	4.08333	98	0.00224438	0.00134894	0.00211543	0.00120347	0.00237333	0.00149441
BSA	4.16667	96	0.00218963	0.00128967	0.0020667	0.00116974	0.00231255	0.0014096
BSA	4.25	98	0.0022726	0.00136694	0.00209352	0.00123631	0.00245168	0.00149757
BSA	4.33333	99	0.00216914	0.00136535	0.00204179	0.00123745	0.00229649	0.00149324
BSA	4.41667	98	0.00221669	0.00140066	0.0020817	0.0012624	0.00235169	0.00153893
BSA	4.5	102	0.00225529	0.00144616	0.00209511	0.00129838	0.00241547	0.00159394
BSA	4.58333	99	0.00221804	0.00138791	0.00207581	0.00125415	0.00236028	0.00152167
BSA	4.66667	99	0.00229237	0.00132649	0.00214945	0.00120131	0.00243529	0.00145167
BSA	4.75	99	0.00224808	0.00137069	0.00211831	0.00123738	0.00237784	0.001504
BSA	4.83333	99	0.00229187	0.00136519	0.00214963	0.0012315	0.00243412	0.00149887
BSA	4.91667	97	0.00221404	0.00139158	0.0020978	0.00124421	0.00233027	0.00153895
BSA	5	98	0.00225772	0.00133777	0.00212744	0.00120523	0.002388	0.00147032
BSA	5.08333	101	0.00220769	0.00133515	0.00206966	0.00119978	0.00234571	0.00147051
BSA	5.16667	98	0.00223999	0.00127289	0.00209852	0.00115037	0.00238146	0.0013954
BSA	5.25	101	0.00219544	0.00132667	0.00205627	0.00120387	0.00233461	0.00144947
BSA	5.33333	102	0.00229367	0.00133559	0.00212477	0.00120114	0.00246258	0.00147004
BSA	5.41667	105	0.0021573	0.00134106	0.00203083	0.00120538	0.00228378	0.00147675
BSA	5.5	103	0.00227347	0.00136626	0.00213185	0.001234	0.00241508	0.00149851
BSA	5.58333	103	0.0022406	0.00138723	0.0021149	0.00125344	0.00236631	0.00152102
BSA	5.66667	102	0.00224909	0.00130543	0.00210395	0.00118989	0.00239424	0.00142097
BSA	5.75	104	0.00227953	0.00130158	0.0021406	0.00118293	0.00241846	0.00142023
BSA	5.83333	104	0.00224701	0.00132542	0.00212359	0.00119411	0.00237042	0.00145673
BSA	5.91667	100	0.00222446	0.00135239	0.00210343	0.00120675	0.00234549	0.00149804
BSA	6	106	0.00214906	0.0013464	0.00203423	0.00121444	0.00226389	0.00147836
BSA	6.08333	105	0.00212007	0.00138759	0.0020019	0.00124154	0.00223824	0.00153364
BSA	6.16667	105	0.00234627	0.00130856	0.00217143	0.00118434	0.0025211	0.00143278
BSA	6.25	101	0.00211451	0.00131754	0.00198544	0.00119054	0.00224358	0.00144455
BSA	6.33333	97	0.0021819	0.00131568	0.00206201	0.0011817	0.0023018	0.00144967
BSA	6.41667	96	0.00218992	0.0012814	0.00203478	0.00116715	0.00234506	0.00139564
BSA	6.5	99	0.00215309	0.00130916	0.00200643	0.00118928	0.00229975	0.00142904
BSA	6.58333	96	0.00200607	0.00127352	0.00188349	0.00114137	0.00212864	0.00140568
BSA	6.66667	93	0.00206791	0.00129471	0.00194875	0.00115874	0.00218708	0.00143068
BSA	6.75	95	0.00207207	0.00126877	0.00194066	0.00114334	0.00220348	0.00139421
BSA	6.83333	89	0.00209703	0.00123379	0.00196535	0.0011061	0.00222871	0.00136148
BSA	6.91667	95	0.00216972	0.00128438	0.00203208	0.00115596	0.00230736	0.00141279
BSA	7	91	0.00219875	0.00123399	0.00204035	0.00110247	0.00235715	0.00136552
BSA	7.08333	95	0.00212473	0.00127444	0.00198587	0.00113352	0.00226358	0.00141536
BSA	7.16667	93	0.00223361	0.00122327	0.0020256	0.00110124	0.00244162	0.0013453
BSA	7.25	92	0.00220742	0.00121707	0.00203165	0.00110293	0.00238319	0.0013312
BSA	7.33333	91	0.00208609	0.00127377	0.00196025	0.00114787	0.00221194	0.00139967
BSA	7.41667	93	0.00198495	0.00122006	0.00187772	0.00108876	0.00209219	0.00135135
BSA	7.5	89	0.00218055	0.00120987	0.00199777	0.00107263	0.00236334	0.00134712
BSA	7.58333	93	0.00213714	0.00127492	0.00199549	0.00111596	0.0022788	0.00143387
BSA	7.66667	93	0.0020143	0.00123429	0.00187525	0.00109401	0.00215334	0.00137457
BSA	7.75	95	0.00199077	0.00118444	0.00185908	0.00105338	0.00212247	0.00131551
BSA	7.83333	94	0.00200282	0.00123668	0.00187982	0.00110568	0.00212582	0.00136767
BSA	7.91667	94	0.00200672	0.00121111	0.00187834	0.00106274	0.0021351	0.00135949
BSA	8	93	0.00204229	0.00119468	0.00193422	0.00108045	0.00215037	0.0013089
BSA	8.08333	95	0.00196728	0.00119958	0.00184758	0.00106537	0.00208697	0.00133379
BSA	8.16667	96	0.00198947	0.00119647	0.00184876	0.00106694	0.00213019	0.001326
BSA	8.25	95	0.00204074	0.00122043	0.00188844	0.00108788	0.00219304	0.00135298
BSA	8.33333	91	0.00195421	0.00119483	0.00184686	0.00106641	0.00206156	0.00132325
BSA	8.41667	95	0.00198612	0.00124559	0.00186389	0.00110717	0.00210834	0.00138401
BSA	8.5	93	0.00199243	0.00121594	0.00185536	0.00107008	0.0021295	0.0013618
BSA	8.58333	93	0.00205683	0.00115917	0.00192856	0.00102061	0.00218509	0.00129774
BSA	8.66667	90	0.00219432	0.00117339	0.00195428	0.0010232	0.00243435	0.00132358
BSA	8.75	92	0.00202052	0.001191	0.00190921	0.00106371	0.00213184	0.0013183
BSA	8.83333	92	0.00211144	0.00117065	0.00196744	0.00105383	0.00225545	0.00128748
BSA	8.91667	90	0.00197351	0.00118882	0.00185125	0.00106518	0.00209577	0.00131245
BSA	9	92	0.00198781	0.00119466	0.00186141	0.00105898	0.00211421	0.00133035
BSA	9.08333	89	0.00198303	0.00115527	0.00186863	0.00101993	0.00209743	0.00129061
BSA	9.16667	90	0.0020381	0.00117656	0.00187496	0.00104085	0.00220125	0.00131226
BSA	9.25	88	0.00193165	0.00117893	0.00180813	0.00105114	0.00205517	0.00130673
BSA	9.33333	92	0.00198428	0.00115781	0.00185613	0.00102788	0.00211243	0.00128774
BSA	9.41667	89	0.0018644	0.00115165	0.00174372	0.00103023	0.00198508	0.00127306
BSA	9.5	88	0.00198619	0.00115928	0.00185676	0.00102763	0.00211561	0.00129093
BSA	9.58333	87	0.00194116	0.00113688	0.00183347	0.000996599	0.00204886	0.00127716
BSA	9.66667	87	0.00195758	0.00115976	0.00182999	0.00102731	0.00208518	0.00129221
BSA	9.75	87	0.00193112	0.001099	0.00181138	0.000968537	0.00205086	0.00122946
BSA	9.83333	87	0.00191662	0.00105937	0.00177868	0.000935238	0.00205456	0.0011835
BSA	9.91667	87	0.00193564	0.00107071	0.00182677	0.000946919	0.0020445	0.0011945
BSA	10	89	0.00195628	0.00110484	0.00183479	0.000985587	0.00207777	0.00122409
BSA	10.0833	89	0.00192593	0.0011078	0.00181894	0.000981964	0.00203292	0.00123364
BSA	10.1667	90	0.00199372	0.00106927	0.00187506	0.000948881	0.00211238	0.00118965
BSA	10.25	93	0.00183976	0.00108892	0.00173478	0.000969851	0.00194474	0.00120799
BSA	10.3333	90	0.00193533	0.00103362	0.00182388	0.000925644	0.00204678	0.00114159
BSA	10.4167	85	0.00190098	0.00104714	0.00177153	0.000929781	0.00203044	0.00116451
BSA	10.5	85	0.00196416	0.00106245	0.00182596	0.000923238	0.00210235	0.00120167
BSA	10.5833	84	0.0018761	0.0010755	0.00177042	0.000943321	0.00198177	0.00120768
BSA	10.6667	87	0.00182845	0.00109496	0.00171998	0.000968237	0.00193691	0.00122169
BSA	10.75	85	0.00184044	0.00105282	0.0017392	0.000934916	0.00194167	0.00117072
BSA	10.8333	90	0.00189784	0.00101756	0.00178703	0.000907192	0.00200865	0.00112794
BSA	10.9167	89	0.00190073	0.00102739	0.00179383	0.000907195	0.00200763	0.00114759
BSA	11	89	0.00192102	0.00110682	0.00179527	0.00098052	0.00204677	0.00123311
BSA	11.0833	88	0.00194506	0.0011008	0.00179714	0.000972079	0.00209298	0.00122952
BSA	11.1667	90	0.00186854	0.00107015	0.00175794	0.000959353	0.00197913	0.00118095
BSA	11.25	90	0.00192321	0.00111157	0.00177972	0.000984872	0.00206671	0.00123828
BSA	11.3333	88	0.00185275	0.00107241	0.00175877	0.000967034	0.00194672	0.00117779
BSA	11.4167	87	0.00186084	0.00118548	0.00175259	0.00103052	0.0019691	0.00134043
BSA	11.5	89	0.00189882	0.00108085	0.00179949	0.000965062	0.00199816	0.00119664
BSA	11.5833	89	0.00180984	0.00111276	0.00170551	0.000990917	0.00191417	0.00123461
BSA	11.6667	89	0.00183813	0.00111635	0.00171935	0.000983716	0.00195691	0.00124898
BSA	11.75	88	0.00176603	0.00110704	0.00166498	0.000975681	0.00186708	0.00123841
BSA	11.8333	83	0.00182973	0.00107646	0.00172297	0.000952086	0.00193649	0.00120083
BSA	11.9167	80	0.00182852	0.00103709	0.00173502	0.000925191	0.00192201	0.001149
BSA	12	86	0.00185935	0.00113924	0.00175547	0.000985996	0.00196323	0.00129249
WNT25	-0.583333	91	0.00228374	0.00136444	0.00212161	0.00117324	0.00244587	0.00155564
WNT25	-0.5	91	0.00227085	0.00136097	0.00212084	0.00116995	0.00242087	0.00155199
WNT25	-0.416667	94	0.00234245	0.00146763	0.00215394	0.00122122	0.00253095	0.00171405
WNT25	-0.333333	91	0.00230685	0.00154667	0.00211118	0.00128593	0.00250251	0.00180741
WNT25	-0.25	90	0.00229356	0.001526	0.00214447	0.00127003	0.00244264	0.00178198
WNT25	-0.166667	95	0.00220735	0.00150754	0.00205479	0.00130081	0.00235992	0.00171427
WNT25	-0.0833333	94	0.0021702	0.00146697	0.00202972	0.00123087	0.00231067	0.00170308
WNT25	0	94	0.00216565	0.00129557	0.00202438	0.00114236	0.00230692	0.00144879
WNT25	0.0833333	92	0.00229049	0.00135082	0.00214419	0.0011891	0.00243678	0.00151254
WNT25	0.166667	93	0.0022942	0.00141	0.00211571	0.00122651	0.0024727	0.00159349
WNT25	0.25	94	0.00210577	0.00148674	0.00195311	0.00129916	0.00225842	0.00167431
WNT25	0.333333	91	0.00223031	0.00156559	0.00210847	0.00133106	0.00235215	0.00180011
WNT25	0.416667	94	0.00226289	0.00160178	0.00211063	0.00138842	0.00241515	0.00181514
WNT25	0.5	93	0.00219912	0.00163788	0.00204139	0.00140963	0.00235685	0.00186614
WNT25	0.583333	91	0.00245634	0.00168224	0.00228885	0.00147091	0.00262384	0.00189358
WNT25	0.666667	91	0.002263	0.00167273	0.00210176	0.00146009	0.00242425	0.00188536
WNT25	0.75	93	0.00230611	0.00175011	0.00217404	0.00156552	0.00243818	0.00193471
WNT25	0.833333	90	0.00223531	0.00181139	0.00208583	0.00162444	0.0023848	0.00199834
WNT25	0.916667	92	0.00239963	0.00182664	0.00226769	0.00164351	0.00253157	0.00200976
WNT25	1	89	0.00238917	0.00192359	0.00226204	0.00172807	0.0025163	0.0021191
WNT25	1.08333	88	0.00233616	0.00199651	0.00218985	0.00179891	0.00248246	0.0021941
WNT25	1.16667	90	0.00250442	0.00191898	0.0023606	0.00175305	0.00264824	0.00208491
WNT25	1.25	92	0.00251643	0.00199639	0.00237448	0.00182076	0.00265839	0.00217201
WNT25	1.33333	96	0.00265404	0.00213723	0.00248807	0.00194281	0.00282001	0.00233164
WNT25	1.41667	90	0.00257429	0.00224271	0.00241716	0.00204664	0.00273142	0.00243878
WNT25	1.5	95	0.00256024	0.00226775	0.00241213	0.00208965	0.00270835	0.00244586
WNT25	1.58333	93	0.00264183	0.00235915	0.00247791	0.0021704	0.00280576	0.0025479
WNT25	1.66667	92	0.00268153	0.00243023	0.00251994	0.00223713	0.00284311	0.00262332
WNT25	1.75	94	0.00288502	0.00246538	0.00269893	0.0022932	0.00307111	0.00263756
WNT25	1.83333	89	0.00289037	0.00252214	0.00272802	0.00234331	0.00305272	0.00270098
WNT25	1.91667	91	0.0029306	0.00257289	0.00277373	0.0023975	0.00308747	0.00274827
WNT25	2	95	0.00294592	0.00273789	0.00276865	0.00254692	0.00312319	0.00292886
WNT25	2.08333	93	0.00289571	0.00270413	0.00271584	0.00252481	0.00307559	0.00288345
WNT25	2.16667	90	0.00289718	0.00275433	0.00272047	0.00258177	0.00307389	0.0029269
WNT25	2.25	85	0.00298999	0.00286559	0.00281337	0.00268179	0.00316661	0.00304939
WNT25	2.33333	89	0.00300368	0.00280207	0.00280355	0.00261642	0.00320381	0.00298772
WNT25	2.41667	86	0.0030195	0.00284354	0.00279898	0.00267527	0.00324003	0.0030118
WNT25	2.5	85	0.00306239	0.00286677	0.00286198	0.00269395	0.0032628	0.0030396
WNT25	2.58333	86	0.00301774	0.00302354	0.0028229	0.00283677	0.00321258	0.00321031
WNT25	2.66667	79	0.00303676	0.00306001	0.00286096	0.00285818	0.00321257	0.00326184
WNT25	2.75	86	0.00309241	0.00316032	0.00288924	0.00296723	0.00329558	0.00335341
WNT25	2.83333	85	0.00319336	0.0032425	0.00297242	0.00302999	0.00341431	0.003455
WNT25	2.91667	79	0.00326904	0.00314015	0.00299926	0.00293759	0.00353881	0.00334272
WNT25	3	80	0.00336828	0.00323182	0.00310754	0.00303024	0.00362902	0.00343341
WNT25	3.08333	79	0.0031656	0.0032173	0.00294424	0.0030379	0.00338695	0.00339669
WNT25	3.16667	77	0.00328584	0.00325967	0.00306391	0.00304653	0.00350776	0.00347281
WNT25	3.25	81	0.00327923	0.00341278	0.00303041	0.00318296	0.00352806	0.00364261
WNT25	3.33333	81	0.00331098	0.00339973	0.0030631	0.00320242	0.00355886	0.00359705
WNT25	3.41667	81	0.00354088	0.00334897	0.00333384	0.00315998	0.00374792	0.00353796
WNT25	3.5	83	0.00365561	0.00347232	0.00339032	0.00324028	0.0039209	0.00370437
WNT25	3.58333	81	0.00350712	0.00342517	0.00324431	0.00321601	0.00376993	0.00363434
WNT25	3.66667	88	0.00357779	0.00344544	0.00334458	0.00323495	0.003811	0.00365592
WNT25	3.75	81	0.00352272	0.00348977	0.00330918	0.00329491	0.00373627	0.00368463
WNT25	3.83333	82	0.00351158	0.00348955	0.00330397	0.00328234	0.00371919	0.00369675
WNT25	3.91667	78	0.00355945	0.00345523	0.00334377	0.00324167	0.00377514	0.00366879
WNT25	4	80	0.00365589	0.00358921	0.00344962	0.00337409	0.00386216	0.00380434
WNT25	4.08333	79	0.00367545	0.00363235	0.00345841	0.00341228	0.0038925	0.00385242
WNT25	4.16667	82	0.00361735	0.00357691	0.00338081	0.00338338	0.00385389	0.00377045
WNT25	4.25	85	0.00370691	0.00357912	0.00344325	0.00338702	0.00397056	0.00377123
WNT25	4.33333	79	0.00391589	0.00358433	0.00364116	0.00338841	0.00419061	0.00378025
WNT25	4.41667	86	0.00375986	0.00363957	0.00352598	0.00344524	0.00399375	0.00383389
WNT25	4.5	81	0.00384839	0.00371475	0.0036486	0.00352045	0.00404819	0.00390904
WNT25	4.58333	75	0.00378913	0.0036968	0.0035601	0.00347782	0.00401815	0.00391579
WNT25	4.66667	81	0.00366701	0.0035827	0.00343968	0.00333127	0.00389434	0.00383413
WNT25	4.75	85	0.00376433	0.00374094	0.0035201	0.00348811	0.00400857	0.00399377
WNT25	4.83333	85	0.00380115	0.00381221	0.00358176	0.00350265	0.00402054	0.00412177
WNT25	4.91667	89	0.0039295	0.0037609	0.00373084	0.00353101	0.00412816	0.00399079
WNT25	5	87	0.00379066	0.00369974	0.00355027	0.0034514	0.00403105	0.00394809
WNT25	5.08333	88	0.00381852	0.00378872	0.00356188	0.0035454	0.00407516	0.00403204
WNT25	5.16667	86	0.00395266	0.00368108	0.00373377	0.00341754	0.00417155	0.00394462
WNT25	5.25	92	0.00374591	0.00363747	0.00350746	0.00337939	0.00398436	0.00389555
WNT25	5.33333	88	0.00370991	0.00366971	0.00348579	0.00342356	0.00393402	0.00391587
WNT25	5.41667	96	0.00376657	0.00368354	0.00353399	0.00345617	0.00399914	0.00391092
WNT25	5.5	100	0.00378402	0.00364561	0.00354848	0.0034139	0.00401955	0.00387733
WNT25	5.58333	95	0.00387166	0.00367929	0.00363112	0.00343525	0.00411219	0.00392333
WNT25	5.66667	93	0.00387931	0.00372175	0.00364695	0.00346151	0.00411168	0.003982
WNT25	5.75	93	0.00380253	0.00378106	0.00356197	0.00350208	0.00404308	0.00406003
WNT25	5.83333	90	0.00384564	0.00371923	0.0035925	0.00345448	0.00409878	0.00398398
WNT25	5.91667	92	0.00388442	0.00362607	0.00361057	0.00337379	0.00415826	0.00387836
WNT25	6	94	0.00374576	0.00374821	0.00351348	0.00351621	0.00397804	0.00398022
WNT25	6.08333	98	0.00387047	0.00382803	0.00365506	0.00358543	0.00408589	0.00407063
WNT25	6.16667	104	0.00379205	0.00378458	0.00357042	0.0035386	0.00401367	0.00403056
WNT25	6.25	98	0.00376915	0.00369598	0.00357331	0.00340823	0.003965	0.00398374
WNT25	6.33333	99	0.00352248	0.00365658	0.0033267	0.00339832	0.00371826	0.00391484
WNT25	6.41667	96	0.00357494	0.00369999	0.00335473	0.0034208	0.00379514	0.00397918
WNT25	6.5	90	0.0039074	0.00367301	0.00370344	0.00338191	0.00411136	0.00396412
WNT25	6.58333	98	0.00390312	0.00370768	0.0036629	0.00344312	0.00414335	0.00397225
WNT25	6.66667	100	0.00389976	0.00361106	0.00369351	0.00339158	0.00410601	0.00383054
WNT25	6.75	102	0.00388381	0.00369867	0.00365719	0.00347044	0.00411042	0.00392689
WNT25	6.83333	100	0.00388657	0.00360129	0.0036433	0.00337724	0.00412985	0.00382533
WNT25	6.91667	108	0.00393163	0.00364613	0.0037197	0.00341203	0.00414357	0.00388024
WNT25	7	101	0.00379722	0.00358758	0.0035469	0.0033469	0.00404754	0.00382825
WNT25	7.08333	103	0.00390119	0.00365446	0.00366415	0.00339304	0.00413823	0.00391588
WNT25	7.16667	102	0.00380667	0.00370211	0.00354685	0.00342391	0.00406648	0.00398032
WNT25	7.25	106	0.00386201	0.00365223	0.00361955	0.00339185	0.00410447	0.00391262
WNT25	7.33333	108	0.00373576	0.00360481	0.00349345	0.00333176	0.00397806	0.00387785
WNT25	7.41667	101	0.00375059	0.00346106	0.0035035	0.0032166	0.00399767	0.00370551
WNT25	7.5	105	0.00378895	0.00355645	0.00351636	0.00328347	0.00406154	0.00382942
WNT25	7.58333	108	0.00372997	0.00344161	0.00348981	0.00319542	0.00397012	0.00368781
WNT25	7.66667	99	0.00375502	0.00362359	0.00346589	0.00327974	0.00404416	0.00396744
WNT25	7.75	106	0.00382439	0.00371627	0.00357029	0.00336859	0.00407848	0.00406395
WNT25	7.83333	108	0.00385606	0.00357714	0.00360064	0.00326575	0.00411149	0.00388853
WNT25	7.91667	111	0.00387346	0.00352869	0.00364762	0.00325363	0.0040993	0.00380375
WNT25	8	108	0.0036932	0.00352973	0.00346247	0.00326349	0.00392393	0.00379597
WNT25	8.08333	114	0.00387893	0.00358802	0.00364413	0.00331531	0.00411373	0.00386073
WNT25	8.16667	119	0.0037996	0.00358855	0.00354244	0.00332745	0.00405676	0.00384964
WNT25	8.25	113	0.00378583	0.00352036	0.00355651	0.00324785	0.00401516	0.00379288
WNT25	8.33333	111	0.00369832	0.00348053	0.00347949	0.0032227	0.00391714	0.00373836
WNT25	8.41667	109	0.00354636	0.00336977	0.00334116	0.00312281	0.00375156	0.00361673
WNT25	8.5	108	0.00363152	0.00333528	0.00340638	0.00309284	0.00385667	0.00357772
WNT25	8.58333	111	0.00375441	0.00342461	0.00352356	0.00316843	0.00398526	0.00368079
WNT25	8.66667	112	0.00368243	0.00342392	0.00344758	0.00315802	0.00391727	0.00368983
WNT25	8.75	113	0.00364479	0.00341888	0.0034376	0.00314414	0.00385198	0.00369362
WNT25	8.83333	111	0.00383445	0.00341656	0.00353077	0.00313494	0.00413813	0.00369818
WNT25	8.91667	110	0.00364257	0.00338824	0.0034266	0.00310567	0.00385854	0.00367082
WNT25	9	110	0.00364039	0.00341935	0.00340984	0.00312492	0.00387093	0.00371378
WNT25	9.08333	109	0.00361493	0.00330368	0.00339348	0.00304624	0.00383637	0.00356112
WNT25	9.16667	107	0.00372695	0.00334392	0.00350083	0.00309095	0.00395308	0.00359689
WNT25	9.25	114	0.00362123	0.00331684	0.00339644	0.00307882	0.00384601	0.00355486
WNT25	9.33333	111	0.00369759	0.00329216	0.00346697	0.00306275	0.00392821	0.00352157
WNT25	9.41667	110	0.00362758	0.00328866	0.00341185	0.00305329	0.00384331	0.00352402
WNT25	9.5	109	0.0035076	0.00322446	0.00330467	0.00297223	0.00371053	0.0034767
WNT25	9.58333	108	0.00360934	0.00319252	0.00340531	0.0029562	0.00381336	0.00342884
WNT25	9.66667	109	0.00355668	0.00324519	0.00332844	0.00299617	0.00378491	0.00349422
WNT25	9.75	114	0.00353058	0.00321901	0.00332132	0.00298917	0.00373984	0.00344885
WNT25	9.83333	110	0.00353432	0.00321707	0.00329711	0.00298034	0.00377153	0.0034538
WNT25	9.91667	110	0.00357655	0.00325064	0.00336974	0.00300513	0.00378337	0.00349615
WNT25	10	112	0.00359924	0.0032794	0.0033845	0.00302501	0.00381399	0.00353379
WNT25	10.0833	113	0.00366783	0.00328369	0.00345982	0.00303457	0.00387585	0.00353281
WNT25	10.1667	113	0.00370891	0.00330312	0.00346005	0.0030566	0.00395778	0.00354963
WNT25	10.25	112	0.00355941	0.00327763	0.00335918	0.00304411	0.00375964	0.00351115
WNT25	10.3333	112	0.00354319	0.00326013	0.00333188	0.00301993	0.0037545	0.00350033
WNT25	10.4167	106	0.00357572	0.00328259	0.00335903	0.00302827	0.0037924	0.0035369
WNT25	10.5	112	0.00340567	0.00328064	0.00319316	0.00303882	0.00361818	0.00352247
WNT25	10.5833	113	0.00351499	0.00334953	0.00332846	0.00311214	0.00370152	0.00358693
WNT25	10.6667	112	0.00353712	0.00332946	0.00332179	0.00307614	0.00375245	0.00358278
WNT25	10.75	113	0.00359388	0.00326542	0.00336749	0.00303161	0.00382027	0.00349924
WNT25	10.8333	112	0.00355448	0.00330581	0.00332946	0.00306067	0.00377951	0.00355095
WNT25	10.9167	114	0.00363801	0.00332449	0.00336787	0.00306741	0.00390815	0.00358157
WNT25	11	111	0.00348338	0.00343606	0.00324902	0.00316616	0.00371773	0.00370596
WNT25	11.0833	109	0.00350112	0.00331554	0.00327249	0.00303226	0.00372976	0.00359882
WNT25	11.1667	106	0.00360762	0.00324732	0.00335774	0.00297525	0.00385751	0.00351938
WNT25	11.25	112	0.00345022	0.0033172	0.00323141	0.00304217	0.00366902	0.00359222
WNT25	11.3333	114	0.00358863	0.0032817	0.00334807	0.0030061	0.0038292	0.0035573
WNT25	11.4167	112	0.00343009	0.0031826	0.00323509	0.00292202	0.00362509	0.00344319
WNT25	11.5	109	0.00355295	0.00322112	0.00332081	0.00294901	0.00378509	0.00349323
WNT25	11.5833	107	0.00350959	0.0031584	0.00330451	0.00288966	0.00371467	0.00342714
WNT25	11.6667	113	0.00342139	0.00316047	0.00321617	0.002899	0.00362661	0.00342194
WNT25	11.75	106	0.00353159	0.00318294	0.00329529	0.00291634	0.00376788	0.00344954
WNT25	11.8333	112	0.00337735	0.00321264	0.00317528	0.00295358	0.00357942	0.0034717
WNT25	11.9167	115	0.00355093	0.0032728	0.00333059	0.00299633	0.00377127	0.00354926
WNT25	12	112	0.0034616	0.00337201	0.00322753	0.0030862	0.00369566	0.00365782
WNT50	-0.583333	116	0.00263477	0.00151505	0.00248431	0.0013825	0.00278523	0.0016476
WNT50	-0.5	117	0.00257215	0.00145374	0.0024292	0.00133031	0.00271511	0.00157718
WNT50	-0.416667	122	0.00265729	0.00153611	0.00251072	0.00140475	0.00280387	0.00166747
WNT50	-0.333333	119	0.00277951	0.00142232	0.00256086	0.00130892	0.00299816	0.00153573
WNT50	-0.25	132	0.00269806	0.00149749	0.00253062	0.00137841	0.00286551	0.00161658
WNT50	-0.166667	127	0.00258064	0.00143043	0.0024348	0.00130599	0.00272647	0.00155487
WNT50	-0.0833333	125	0.00251962	0.0014416	0.00235832	0.00132367	0.00268092	0.00155953
WNT50	0	126	0.00268471	0.00149121	0.00254009	0.00137456	0.00282934	0.00160786
WNT50	0.0833333	123	0.00263538	0.00147828	0.00248831	0.00136323	0.00278246	0.00159333
WNT50	0.166667	123	0.00257358	0.00151605	0.00243961	0.00139348	0.00270755	0.00163861
WNT50	0.25	120	0.00260744	0.00158404	0.00246517	0.00145534	0.00274972	0.00171274
WNT50	0.333333	120	0.00254248	0.00150598	0.0024097	0.00139239	0.00267526	0.00161956
WNT50	0.416667	120	0.00255198	0.00153296	0.00242195	0.00140336	0.00268202	0.00166257
WNT50	0.5	116	0.00258755	0.00153486	0.00242147	0.00141615	0.00275362	0.00165358
WNT50	0.583333	124	0.00258823	0.00165483	0.00243624	0.00151838	0.00274022	0.00179129
WNT50	0.666667	118	0.00257425	0.00158443	0.0024109	0.0014608	0.00273761	0.00170807
WNT50	0.75	124	0.00267013	0.00166487	0.00248648	0.00154687	0.00285377	0.00178288
WNT50	0.833333	123	0.00256693	0.00173733	0.00241193	0.00159816	0.00272194	0.00187649
WNT50	0.916667	123	0.00262771	0.00175903	0.00246917	0.00162291	0.00278625	0.00189514
WNT50	1	118	0.00268868	0.00182902	0.00253969	0.00170508	0.00283767	0.00195297
WNT50	1.08333	126	0.00267406	0.00188733	0.00253389	0.00176628	0.00281423	0.00200837
WNT50	1.16667	134	0.00278472	0.00199657	0.00260922	0.00185758	0.00296022	0.00213556
WNT50	1.25	130	0.00288126	0.00208835	0.00272813	0.00194778	0.00303439	0.00222892
WNT50	1.33333	126	0.00283836	0.0021873	0.0026935	0.00206085	0.00298323	0.00231376
WNT50	1.41667	131	0.00288354	0.0022953	0.0027275	0.00217344	0.00303958	0.00241716
WNT50	1.5	122	0.00318194	0.00245143	0.00302651	0.00230279	0.00333737	0.00260006
WNT50	1.58333	125	0.00318593	0.00253428	0.00300067	0.0023807	0.0033712	0.00268786
WNT50	1.66667	122	0.00312682	0.00256425	0.00295436	0.0024079	0.00329928	0.0027206
WNT50	1.75	127	0.00319536	0.00269447	0.00304239	0.00254726	0.00334833	0.00284169
WNT50	1.83333	124	0.00327251	0.00276448	0.00308694	0.00261131	0.00345807	0.00291765
WNT50	1.91667	126	0.003224	0.00287317	0.00306471	0.00271082	0.00338328	0.00303552
WNT50	2	120	0.00341178	0.00298093	0.00325623	0.00281367	0.00356733	0.00314819
WNT50	2.08333	126	0.0032965	0.00302717	0.00312798	0.0028651	0.00346502	0.00318923
WNT50	2.16667	122	0.00347367	0.00305976	0.00331674	0.00289897	0.00363059	0.00322055
WNT50	2.25	123	0.0034291	0.00314057	0.00325077	0.00298722	0.00360744	0.00329391
WNT50	2.33333	126	0.00349431	0.00314852	0.00326033	0.00299564	0.00372828	0.0033014
WNT50	2.41667	125	0.00344456	0.00314963	0.00328223	0.00301779	0.00360689	0.00328147
WNT50	2.5	126	0.00356435	0.00321914	0.00339785	0.00309089	0.00373085	0.00334739
WNT50	2.58333	122	0.00354652	0.00330146	0.00322329	0.00316856	0.00386976	0.00343436
WNT50	2.66667	120	0.00351184	0.00336261	0.0033542	0.00322843	0.00366948	0.00349679
WNT50	2.75	122	0.00351496	0.00329034	0.00337056	0.00316866	0.00365935	0.00341203
WNT50	2.83333	118	0.00350944	0.00332355	0.00333239	0.00319474	0.0036865	0.00345236
WNT50	2.91667	122	0.00350834	0.00335334	0.00336245	0.00322141	0.00365424	0.00348528
WNT50	3	119	0.0037339	0.00347254	0.00356393	0.00333264	0.00390387	0.00361244
WNT50	3.08333	126	0.00366871	0.00345086	0.00348271	0.00331103	0.0038547	0.00359069
WNT50	3.16667	120	0.00382163	0.0035122	0.00360097	0.00338499	0.00404228	0.00363941
WNT50	3.25	124	0.00377392	0.00349555	0.00360333	0.00337039	0.00394451	0.00362072
WNT50	3.33333	129	0.00395571	0.00365699	0.00375674	0.00352252	0.00415467	0.00379145
WNT50	3.41667	128	0.0038322	0.00367514	0.00362204	0.00354919	0.00404236	0.00380109
WNT50	3.5	127	0.00393707	0.0036934	0.00378027	0.00356296	0.00409386	0.00382384
WNT50	3.58333	130	0.00392119	0.00376498	0.00374673	0.00362713	0.00409566	0.00390283
WNT50	3.66667	133	0.0039098	0.00383787	0.00375648	0.00367841	0.00406313	0.00399733
WNT50	3.75	131	0.00397099	0.00386342	0.00382981	0.00369286	0.00411218	0.00403399
WNT50	3.83333	133	0.00408405	0.00390867	0.00392035	0.00374604	0.00424775	0.00407129
WNT50	3.91667	138	0.00405042	0.00400052	0.0038637	0.00383148	0.00423714	0.00416956
WNT50	4	138	0.00408286	0.00402353	0.00392387	0.00386086	0.00424185	0.0041862
WNT50	4.08333	134	0.00408947	0.00398414	0.00390213	0.00380903	0.00427681	0.00415924
WNT50	4.16667	126	0.00420285	0.00397117	0.00398235	0.00379876	0.00442334	0.00414357
WNT50	4.25	124	0.00414115	0.00409767	0.00393981	0.0039166	0.0043425	0.00427874
WNT50	4.33333	129	0.0041491	0.0040378	0.0039613	0.00386864	0.0043369	0.00420696
WNT50	4.41667	130	0.00433873	0.00416489	0.00418004	0.00400503	0.00449742	0.00432475
WNT50	4.5	132	0.00432095	0.00409708	0.00413797	0.00393549	0.00450393	0.00425867
WNT50	4.58333	130	0.00434795	0.00414287	0.00416301	0.0039574	0.00453288	0.00432835
WNT50	4.66667	124	0.00436537	0.00411782	0.00417361	0.00393782	0.00455713	0.00429782
WNT50	4.75	128	0.00447127	0.00413426	0.0043022	0.00396035	0.00464034	0.00430816
WNT50	4.83333	124	0.0043482	0.00405907	0.00414088	0.00388788	0.00455552	0.00423027
WNT50	4.91667	126	0.0043842	0.00412239	0.0041893	0.0039438	0.0045791	0.00430097
WNT50	5	120	0.00430745	0.00415132	0.0040942	0.00397966	0.0045207	0.00432297
WNT50	5.08333	120	0.00432714	0.00420998	0.00411443	0.0040151	0.00453985	0.00440486
WNT50	5.16667	126	0.00430875	0.00425332	0.00410089	0.00407203	0.0045166	0.00443461
WNT50	5.25	117	0.0043664	0.00419308	0.00411685	0.00402782	0.00461595	0.00435834
WNT50	5.33333	119	0.00451578	0.00428412	0.00415669	0.00409518	0.00487487	0.00447306
WNT50	5.41667	120	0.00446772	0.004297	0.0042604	0.00411075	0.00467504	0.00448326
WNT50	5.5	126	0.00447625	0.00422628	0.00427256	0.00404431	0.00467995	0.00440825
WNT50	5.58333	127	0.00431136	0.00437872	0.00409883	0.00420613	0.00452389	0.00455131
WNT50	5.66667	132	0.00456762	0.00435534	0.00434116	0.00416584	0.00479408	0.00454484
WNT50	5.75	137	0.00440528	0.00449967	0.004179	0.00427075	0.00463156	0.00472858
WNT50	5.83333	127	0.00441106	0.00443788	0.00417121	0.00421817	0.00465092	0.00465759
WNT50	5.91667	123	0.00437053	0.00435146	0.00415333	0.00414363	0.00458773	0.0045593
WNT50	6	131	0.00436377	0.00431336	0.00415322	0.00409952	0.00457432	0.00452721
WNT50	6.08333	124	0.0044314	0.00420415	0.0042092	0.00400472	0.00465361	0.00440357
WNT50	6.16667	124	0.00434961	0.00422412	0.00411257	0.00401627	0.00458666	0.00443197
WNT50	6.25	128	0.00423295	0.00429294	0.00402111	0.00407817	0.00444479	0.00450771
WNT50	6.33333	123	0.00427638	0.00436824	0.00402093	0.00416146	0.00453183	0.00457502
WNT50	6.41667	125	0.00438908	0.00442138	0.00415345	0.004182	0.00462472	0.00466076
WNT50	6.5	118	0.00436858	0.00434192	0.0041642	0.00411828	0.00457295	0.00456556
WNT50	6.58333	128	0.00438364	0.00434098	0.00418469	0.00413269	0.00458258	0.00454927
WNT50	6.66667	131	0.00427373	0.00423002	0.00403617	0.00401896	0.00451129	0.00444108
WNT50	6.75	125	0.00432819	0.00421447	0.00410208	0.00398407	0.0045543	0.00444487
WNT50	6.83333	119	0.00433302	0.00425031	0.00411279	0.00401763	0.00455324	0.00448298
WNT50	6.91667	127	0.00421231	0.00435531	0.00396117	0.00410894	0.00446345	0.00460169
WNT50	7	128	0.00426183	0.00412976	0.00403735	0.00391178	0.00448632	0.00434774
WNT50	7.08333	132	0.00429956	0.00411147	0.00409669	0.00391397	0.00450244	0.00430897
WNT50	7.16667	128	0.00430876	0.00414105	0.00410354	0.00392188	0.00451398	0.00436023
WNT50	7.25	124	0.00426472	0.00416558	0.00405127	0.00394131	0.00447818	0.00438984
WNT50	7.33333	122	0.00434871	0.00419537	0.00410535	0.0039658	0.00459206	0.00442494
WNT50	7.41667	122	0.00429967	0.00417411	0.00409416	0.00394049	0.00450518	0.00440773
WNT50	7.5	121	0.004293	0.00413869	0.00408063	0.00389498	0.00450538	0.0043824
WNT50	7.58333	122	0.00439503	0.00418074	0.00419063	0.00393503	0.00459943	0.00442645
WNT50	7.66667	129	0.00426574	0.00417227	0.00405834	0.00393477	0.00447314	0.00440977
WNT50	7.75	124	0.00434875	0.00414843	0.00414649	0.00392575	0.00455102	0.0043711
WNT50	7.83333	122	0.00428047	0.00417786	0.00406545	0.00392523	0.00449549	0.00443049
WNT50	7.91667	124	0.00437593	0.00415577	0.00415928	0.00391136	0.00459258	0.00440018
WNT50	8	128	0.00418559	0.00420295	0.0039567	0.0039473	0.00441447	0.00445859
WNT50	8.08333	127	0.00411391	0.00417162	0.0038795	0.00391513	0.00434832	0.00442811
WNT50	8.16667	136	0.00426797	0.00403606	0.00404263	0.00379566	0.0044933	0.00427646
WNT50	8.25	129	0.0042948	0.0040837	0.00406915	0.0038358	0.00452044	0.00433159
WNT50	8.33333	132	0.00428666	0.00413062	0.0040783	0.00387289	0.00449502	0.00438835
WNT50	8.41667	134	0.00403982	0.00403178	0.00381616	0.00377409	0.00426349	0.00428947
WNT50	8.5	129	0.00413199	0.00401374	0.00394957	0.00375896	0.0043144	0.00426852
WNT50	8.58333	139	0.00414961	0.00398786	0.00393985	0.00375031	0.00435938	0.00422541
WNT50	8.66667	144	0.0042304	0.00404052	0.00402414	0.00378002	0.00443665	0.00430101
WNT50	8.75	137	0.0041943	0.00391807	0.00398246	0.00369753	0.00440615	0.00413861
WNT50	8.83333	133	0.00407874	0.00388818	0.00388065	0.00365768	0.00427683	0.00411869
WNT50	8.91667	138	0.00417939	0.00397818	0.00397305	0.00371575	0.00438574	0.0042406
WNT50	9	137	0.00414285	0.00390742	0.00390995	0.0036632	0.00437575	0.00415164
WNT50	9.08333	143	0.00422427	0.00400872	0.00400103	0.00375359	0.00444752	0.00426384
WNT50	9.16667	142	0.00408588	0.00396931	0.00388512	0.00370911	0.00428664	0.00422952
WNT50	9.25	130	0.00409295	0.00397663	0.00386594	0.00372874	0.00431995	0.00422453
WNT50	9.33333	134	0.00407664	0.00390285	0.00385005	0.00365796	0.00430323	0.00414774
WNT50	9.41667	131	0.004031	0.00379765	0.00381839	0.00356856	0.00424362	0.00402674
WNT50	9.5	128	0.0041534	0.00377735	0.00390791	0.00353419	0.00439888	0.00402051
WNT50	9.58333	131	0.00406101	0.00381455	0.00383358	0.00357732	0.00428844	0.00405178
WNT50	9.66667	132	0.00412274	0.00385108	0.00391107	0.00361671	0.0043344	0.00408545
WNT50	9.75	133	0.00402545	0.00376692	0.00379859	0.00353543	0.00425231	0.00399841
WNT50	9.83333	133	0.00420796	0.00383029	0.00395539	0.00358897	0.00446053	0.0040716
WNT50	9.91667	134	0.00411941	0.00377428	0.00389881	0.0035415	0.00434001	0.00400705
WNT50	10	134	0.00409692	0.00374912	0.0038806	0.00351242	0.00431325	0.00398583
WNT50	10.0833	133	0.00404869	0.00370658	0.0038327	0.00346636	0.00426469	0.0039468
WNT50	10.1667	135	0.0039032	0.00368323	0.00366726	0.00344572	0.00413914	0.00392074
WNT50	10.25	129	0.00416257	0.00374463	0.00394779	0.00349641	0.00437735	0.00399286
WNT50	10.3333	136	0.00407466	0.00374606	0.00386414	0.0035122	0.00428518	0.00397991
WNT50	10.4167	139	0.00404346	0.00373214	0.00383095	0.00349357	0.00425597	0.0039707
WNT50	10.5	135	0.0040751	0.00370268	0.00387439	0.00345783	0.00427582	0.00394754
WNT50	10.5833	134	0.00401405	0.00368253	0.00380153	0.00344304	0.00422658	0.00392202
WNT50	10.6667	133	0.00408031	0.00369	0.00384425	0.00344743	0.00431637	0.00393256
WNT50	10.75	129	0.00405297	0.00374408	0.00384838	0.00350086	0.00425757	0.00398731
WNT50	10.8333	131	0.00403915	0.00370816	0.00383729	0.00346418	0.00424102	0.00395215
WNT50	10.9167	133	0.00400403	0.00373557	0.00378831	0.00348137	0.00421975	0.00398977
WNT50	11	136	0.00394089	0.00369322	0.00370364	0.00344983	0.00417813	0.00393662
WNT50	11.0833	138	0.00392585	0.00367607	0.00370011	0.00342313	0.00415159	0.00392901
WNT50	11.1667	130	0.00401146	0.0037103	0.00379138	0.00345066	0.00423153	0.00396995
WNT50	11.25	129	0.00393805	0.00371268	0.00370724	0.00345134	0.00416886	0.00397403
WNT50	11.3333	135	0.00396599	0.00380286	0.00375139	0.00353871	0.00418059	0.00406701
WNT50	11.4167	131	0.00401927	0.00370417	0.0037925	0.00345484	0.00424605	0.0039535
WNT50	11.5	128	0.00393894	0.00366348	0.00373681	0.00341506	0.00414107	0.0039119
WNT50	11.5833	126	0.00390457	0.00366858	0.00369566	0.00341061	0.00411347	0.00392655
WNT50	11.6667	136	0.00403025	0.00375242	0.00381543	0.003503	0.00424507	0.00400184
WNT50	11.75	131	0.00402359	0.0036686	0.00379348	0.00341533	0.0042537	0.00392187
WNT50	11.8333	131	0.00379026	0.00363359	0.00357419	0.00338774	0.00400633	0.00387944
WNT50	11.9167	130	0.00403877	0.00364278	0.00380762	0.00338682	0.00426991	0.00389874
WNT50	12	136	0.00388834	0.00368652	0.00365744	0.00344061	0.00411924	0.00393242
WNT75	-0.583333	69	0.00256116	0.00155718	0.00236629	0.00135039	0.00275603	0.00176397
WNT75	-0.5	72	0.00260883	0.00160984	0.00240888	0.00137547	0.00280878	0.00184421
WNT75	-0.416667	72	0.00271919	0.00160315	0.00249939	0.0014026	0.002939	0.00180369
WNT75	-0.333333	68	0.00258278	0.00150279	0.00239451	0.00131755	0.00277104	0.00168803
WNT75	-0.25	71	0.00266563	0.00152724	0.00242399	0.00134368	0.00290726	0.0017108
WNT75	-0.166667	66	0.00235512	0.00154361	0.00220436	0.00132713	0.00250589	0.0017601
WNT75	-0.0833333	67	0.00239662	0.00144064	0.00221541	0.00126541	0.00257782	0.00161587
WNT75	0	71	0.00252068	0.00163123	0.00234731	0.00143881	0.00269404	0.00182366
WNT75	0.0833333	64	0.00262938	0.00158162	0.00242918	0.0013686	0.00282958	0.00179464
WNT75	0.166667	69	0.00258636	0.0016678	0.00240405	0.00143872	0.00276868	0.00189689
WNT75	0.25	70	0.00244174	0.00162052	0.00227301	0.00141749	0.00261047	0.00182355
WNT75	0.333333	72	0.00250058	0.00160964	0.00234564	0.00142109	0.00265553	0.00179819
WNT75	0.416667	72	0.00259037	0.00150681	0.00243835	0.00134558	0.00274239	0.00166805
WNT75	0.5	71	0.00263267	0.00146843	0.00245452	0.00132761	0.00281081	0.00160926
WNT75	0.583333	78	0.00271816	0.00180437	0.00252245	0.00158032	0.00291387	0.00202843
WNT75	0.666667	74	0.00268117	0.00184925	0.00247659	0.00161302	0.00288576	0.00208548
WNT75	0.75	73	0.00268766	0.00182451	0.00249986	0.00160557	0.00287545	0.00204345
WNT75	0.833333	75	0.00264318	0.00176404	0.00246203	0.00160052	0.00282432	0.00192755
WNT75	0.916667	75	0.00273068	0.00189637	0.00256602	0.00169729	0.00289533	0.00209544
WNT75	1	72	0.00291867	0.0020127	0.00271358	0.0017885	0.00312375	0.0022369
WNT75	1.08333	70	0.00289873	0.00228113	0.00268813	0.00186397	0.00310933	0.0026983
WNT75	1.16667	73	0.00305355	0.00227249	0.00282197	0.00201278	0.00328513	0.00253219
WNT75	1.25	77	0.00320981	0.0023635	0.00298884	0.00212812	0.00343078	0.00259889
WNT75	1.33333	82	0.00325056	0.00249102	0.00302354	0.00226704	0.00347757	0.00271499
WNT75	1.41667	79	0.00330465	0.00250877	0.00308188	0.00229812	0.00352742	0.00271941
WNT75	1.5	83	0.00318473	0.00263125	0.00300678	0.00242088	0.00336267	0.00284162
WNT75	1.58333	82	0.00318379	0.00273464	0.00296095	0.00249483	0.00340663	0.00297445
WNT75	1.66667	84	0.00348187	0.00269426	0.00327831	0.00249815	0.00368543	0.00289037
WNT75	1.75	79	0.00350196	0.00279196	0.00329	0.00256825	0.00371392	0.00301566
WNT75	1.83333	86	0.00346264	0.00280965	0.00325346	0.00263594	0.00367182	0.00298337
WNT75	1.91667	86	0.00343317	0.00295224	0.00326208	0.00273092	0.00360425	0.00317357
WNT75	2	81	0.0034818	0.00293961	0.00331422	0.00275797	0.00364938	0.00312125
WNT75	2.08333	85	0.0035791	0.00308363	0.00337289	0.00286489	0.0037853	0.00330237
WNT75	2.16667	90	0.00349525	0.00311937	0.00331376	0.00291538	0.00367675	0.00332336
WNT75	2.25	93	0.00357071	0.00312929	0.0033465	0.00294378	0.00379491	0.0033148
WNT75	2.33333	89	0.00354727	0.0031981	0.00334988	0.00300576	0.00374466	0.00339044
WNT75	2.41667	93	0.00350226	0.00325995	0.00328151	0.00299252	0.00372302	0.00352738
WNT75	2.5	93	0.00386546	0.00339645	0.0036165	0.00311382	0.00411443	0.00367908
WNT75	2.58333	89	0.00405256	0.00339515	0.00379583	0.00318062	0.00430928	0.00360968
WNT75	2.66667	95	0.00391238	0.00343658	0.00370987	0.00322183	0.00411488	0.00365134
WNT75	2.75	94	0.00376037	0.00356313	0.00356063	0.00328816	0.00396012	0.0038381
WNT75	2.83333	99	0.00375506	0.00360435	0.00353117	0.00335268	0.00397896	0.00385602
WNT75	2.91667	95	0.00390631	0.00358931	0.00368392	0.00332546	0.0041287	0.00385316
WNT75	3	87	0.00387923	0.00347825	0.00368063	0.00330338	0.00407784	0.00365313
WNT75	3.08333	90	0.00390167	0.00354882	0.00371776	0.00336524	0.00408557	0.00373239
WNT75	3.16667	91	0.00384724	0.0036299	0.00366137	0.00344059	0.00403312	0.0038192
WNT75	3.25	88	0.00415695	0.00376184	0.00389929	0.00356167	0.0044146	0.00396202
WNT75	3.33333	90	0.00397298	0.00366968	0.00376642	0.0034774	0.00417955	0.00386196
WNT75	3.41667	88	0.00435149	0.00376237	0.00397201	0.00357612	0.00473097	0.00394862
WNT75	3.5	86	0.00398157	0.00380007	0.00378863	0.00362113	0.0041745	0.00397901
WNT75	3.58333	93	0.00410973	0.0039452	0.00386257	0.00376294	0.0043569	0.00412746
WNT75	3.66667	88	0.00403172	0.00397681	0.00380723	0.00378594	0.0042562	0.00416768
WNT75	3.75	90	0.00437189	0.00393248	0.00410474	0.00376027	0.00463903	0.00410469
WNT75	3.83333	89	0.00436837	0.0040541	0.00418358	0.00385372	0.00455316	0.00425449
WNT75	3.91667	86	0.00435809	0.00424303	0.00412331	0.00398904	0.00459286	0.00449703
WNT75	4	84	0.0045193	0.00434974	0.00432932	0.00411033	0.00470928	0.00458916
WNT75	4.08333	83	0.00456715	0.00425796	0.00436398	0.00403576	0.00477032	0.00448016
WNT75	4.16667	84	0.00439267	0.00425458	0.00420031	0.00406294	0.00458503	0.00444623
WNT75	4.25	80	0.00438111	0.00424032	0.0041502	0.00403234	0.00461202	0.0044483
WNT75	4.33333	86	0.00443456	0.00437407	0.00424657	0.00412858	0.00462255	0.00461956
WNT75	4.41667	81	0.00437497	0.00424044	0.00416309	0.00402684	0.00458685	0.00445403
WNT75	4.5	83	0.0046212	0.00441154	0.00436328	0.00419957	0.00487912	0.0046235
WNT75	4.58333	82	0.00455655	0.00431558	0.0042976	0.00411948	0.00481549	0.00451167
WNT75	4.66667	84	0.00446316	0.00438436	0.00424915	0.00418386	0.00467717	0.00458486
WNT75	4.75	83	0.0045131	0.00440778	0.00426654	0.00418296	0.00475965	0.0046326
WNT75	4.83333	77	0.00459511	0.00442629	0.00436701	0.004222	0.00482321	0.00463059
WNT75	4.91667	89	0.0045111	0.00445187	0.00428035	0.00424354	0.00474185	0.00466021
WNT75	5	86	0.0047298	0.00448205	0.00449952	0.00425856	0.00496009	0.00470555
WNT75	5.08333	87	0.0046625	0.0045058	0.00441908	0.00426197	0.00490592	0.00474962
WNT75	5.16667	91	0.00457984	0.00451352	0.00438577	0.00426707	0.00477391	0.00475997
WNT75	5.25	89	0.0044988	0.00454609	0.00427146	0.00431793	0.00472614	0.00477426
WNT75	5.33333	84	0.00464207	0.0044588	0.00442695	0.00423726	0.00485719	0.00468034
WNT75	5.41667	90	0.00454105	0.0045452	0.00436591	0.00431208	0.00471619	0.00477832
WNT75	5.5	92	0.00474067	0.00450378	0.00451718	0.00424796	0.00496416	0.0047596
WNT75	5.58333	92	0.00470782	0.00466257	0.00446856	0.00438418	0.00494709	0.00494097
WNT75	5.66667	86	0.00465865	0.00451528	0.00440375	0.00424446	0.00491355	0.0047861
WNT75	5.75	87	0.00469372	0.00453054	0.00447967	0.00426548	0.00490778	0.0047956
WNT75	5.83333	91	0.00473907	0.00464264	0.00452521	0.00435225	0.00495294	0.00493302
WNT75	5.91667	92	0.00464521	0.00455356	0.00438851	0.00427746	0.00490191	0.00482965
WNT75	6	96	0.00455198	0.0044633	0.00434123	0.00420122	0.00476273	0.00472539
WNT75	6.08333	91	0.00441013	0.004356	0.00421337	0.004107	0.00460688	0.004605
WNT75	6.16667	89	0.00450058	0.00432564	0.0042949	0.00407772	0.00470627	0.00457356
WNT75	6.25	93	0.00442942	0.00432181	0.00416266	0.00408049	0.00469618	0.00456313
WNT75	6.33333	90	0.00451722	0.00427794	0.00422989	0.00401392	0.00480455	0.00454195
WNT75	6.41667	94	0.00443656	0.00426529	0.00420355	0.00398771	0.00466956	0.00454288
WNT75	6.5	93	0.00428717	0.00418035	0.00407248	0.0039425	0.00450186	0.0044182
WNT75	6.58333	90	0.00431653	0.00409328	0.00408295	0.00385343	0.00455011	0.00433313
WNT75	6.66667	86	0.00430006	0.00414272	0.00403668	0.00385322	0.00456344	0.00443222
WNT75	6.75	88	0.00425977	0.00415052	0.00405625	0.00386961	0.00446328	0.00443143
WNT75	6.83333	90	0.00428308	0.00401858	0.00408102	0.00377602	0.00448514	0.00426113
WNT75	6.91667	85	0.00410286	0.00404326	0.00388883	0.00379965	0.00431689	0.00428687
WNT75	7	90	0.00422705	0.0041577	0.00401323	0.00388203	0.00444086	0.00443337
WNT75	7.08333	90	0.00427454	0.00413141	0.0039716	0.00387301	0.00457747	0.0043898
WNT75	7.16667	92	0.0042252	0.00404392	0.00399801	0.00378109	0.0044524	0.00430675
WNT75	7.25	91	0.00424341	0.00395085	0.00403208	0.0037235	0.00445475	0.0041782
WNT75	7.33333	89	0.00422593	0.00401846	0.00400833	0.00376872	0.00444354	0.0042682
WNT75	7.41667	91	0.00416891	0.00391873	0.00394602	0.00371315	0.0043918	0.00412432
WNT75	7.5	88	0.00426987	0.00397604	0.00404634	0.00376923	0.0044934	0.00418285
WNT75	7.58333	91	0.00419852	0.00390549	0.00398302	0.00368094	0.00441401	0.00413004
WNT75	7.66667	94	0.00437845	0.00398486	0.00416532	0.00373552	0.00459157	0.00423419
WNT75	7.75	92	0.00444416	0.00397257	0.00422271	0.00376312	0.00466562	0.00418202
WNT75	7.83333	88	0.0043495	0.00387586	0.00413429	0.00366483	0.00456471	0.00408689
WNT75	7.91667	92	0.00432975	0.00397607	0.0041105	0.00375575	0.004549	0.00419639
WNT75	8	90	0.00424517	0.00399792	0.00403102	0.00377934	0.00445931	0.00421651
WNT75	8.08333	90	0.00429496	0.0039503	0.00407353	0.00374289	0.0045164	0.00415771
WNT75	8.16667	97	0.00432337	0.00392222	0.00410324	0.00369671	0.00454351	0.00414773
WNT75	8.25	93	0.00414503	0.0039686	0.00395791	0.00374659	0.00433216	0.00419062
WNT75	8.33333	92	0.0041357	0.00389399	0.00394136	0.00367809	0.00433003	0.0041099
WNT75	8.41667	96	0.00428518	0.00386483	0.00408452	0.00365174	0.00448583	0.00407792
WNT75	8.5	97	0.00422897	0.00388212	0.00402359	0.00366435	0.00443434	0.00409988
WNT75	8.58333	96	0.00419515	0.00390918	0.00399935	0.00368182	0.00439095	0.00413653
WNT75	8.66667	96	0.00430175	0.00397584	0.00409329	0.00372477	0.00451021	0.00422691
WNT75	8.75	95	0.00427301	0.00396961	0.00406079	0.00370732	0.00448523	0.0042319
WNT75	8.83333	90	0.00427401	0.00398892	0.00407832	0.00371666	0.00446971	0.00426119
WNT75	8.91667	90	0.00421602	0.00392558	0.00399749	0.00368819	0.00443455	0.00416297
WNT75	9	88	0.0040693	0.00393652	0.003862	0.00364995	0.00427661	0.00422308
WNT75	9.08333	91	0.00407491	0.00395712	0.00387258	0.00369209	0.00427725	0.00422215
WNT75	9.16667	91	0.00420213	0.00389886	0.00398523	0.00364787	0.00441903	0.00414984
WNT75	9.25	88	0.00407889	0.00384525	0.00387436	0.00359202	0.00428341	0.00409848
WNT75	9.33333	90	0.00397	0.00372347	0.00377587	0.00349044	0.00416413	0.00395649
WNT75	9.41667	87	0.00403375	0.00375565	0.00382651	0.00351815	0.00424099	0.00399315
WNT75	9.5	94	0.00411307	0.00375808	0.00389784	0.00353769	0.00432831	0.00397847
WNT75	9.58333	92	0.00407704	0.00381669	0.00387487	0.00356578	0.00427921	0.00406761
WNT75	9.66667	93	0.00404659	0.00369961	0.00385218	0.00348313	0.004241	0.00391609
WNT75	9.75	95	0.00402863	0.0037988	0.00383288	0.00355333	0.00422439	0.00404427
WNT75	9.83333	88	0.00411635	0.00370643	0.00390389	0.00347586	0.00432881	0.00393701
WNT75	9.91667	99	0.0040978	0.00370901	0.00389941	0.00349368	0.00429618	0.00392433
WNT75	10	94	0.00404272	0.00369109	0.0038514	0.00347294	0.00423404	0.00390923
WNT75	10.0833	98	0.00417916	0.00371935	0.00396529	0.00350692	0.00439303	0.00393178
WNT75	10.1667	90	0.00404309	0.00362963	0.00383539	0.00341891	0.00425079	0.00384035
WNT75	10.25	95	0.00410365	0.00363965	0.00392922	0.00342979	0.00427808	0.0038495
WNT75	10.3333	93	0.00399156	0.0036728	0.00380056	0.00345036	0.00418256	0.00389524
WNT75	10.4167	90	0.00401103	0.00371576	0.0038333	0.00347018	0.00418876	0.00396134
WNT75	10.5	93	0.0039776	0.00375376	0.00377228	0.00352284	0.00418292	0.00398468
WNT75	10.5833	90	0.00400027	0.00369807	0.00379525	0.00345678	0.0042053	0.00393936
WNT75	10.6667	92	0.00412531	0.00369237	0.0039224	0.00343185	0.00432823	0.00395289
WNT75	10.75	94	0.00407168	0.00364478	0.0038772	0.00339041	0.00426616	0.00389914
WNT75	10.8333	93	0.00405089	0.00357487	0.00388051	0.003348	0.00422127	0.00380174
WNT75	10.9167	91	0.00396775	0.00351102	0.00379728	0.00328094	0.00413821	0.0037411
WNT75	11	91	0.00407907	0.00355388	0.00389902	0.00332608	0.00425913	0.00378168
WNT75	11.0833	95	0.00401112	0.00361585	0.0038458	0.0033038	0.00417644	0.0039279
WNT75	11.1667	92	0.00395414	0.00350899	0.00378616	0.00327658	0.00412211	0.00374139
WNT75	11.25	98	0.00402676	0.00354922	0.00382889	0.00328253	0.00422463	0.0038159
WNT75	11.3333	103	0.00399943	0.00347096	0.00377734	0.00321997	0.00422152	0.00372195
WNT75	11.4167	100	0.00394453	0.00352143	0.00371354	0.00325598	0.00417553	0.00378689
WNT75	11.5	99	0.0039451	0.00354631	0.00373189	0.00326142	0.0041583	0.0038312
WNT75	11.5833	103	0.00394677	0.00347359	0.00372646	0.00320398	0.00416708	0.00374321
WNT75	11.6667	101	0.00385635	0.00345436	0.00365186	0.00320088	0.00406083	0.00370784
WNT75	11.75	95	0.00388522	0.00341523	0.00365637	0.00313322	0.00411408	0.00369724
WNT75	11.8333	92	0.00390863	0.00345954	0.0036693	0.00316592	0.00414795	0.00375315
WNT75	11.9167	95	0.00390229	0.00347602	0.00365327	0.00319205	0.00415131	0.00375999
WNT75	12	97	0.00388576	0.00345496	0.00366893	0.00316849	0.00410258	0.00374143
WNT100	-0.583333	78	0.00238542	0.00156373	0.00220474	0.00136892	0.0025661	0.00175853
WNT100	-0.5	85	0.00244308	0.00154821	0.0022365	0.0013349	0.00264965	0.00176151
WNT100	-0.416667	79	0.00238718	0.00156993	0.0022077	0.00137815	0.00256665	0.0017617
WNT100	-0.333333	82	0.00246439	0.00161232	0.00225833	0.00139835	0.00267044	0.00182629
WNT100	-0.25	76	0.00260477	0.00164169	0.00237616	0.00138621	0.00283338	0.00189717
WNT100	-0.166667	81	0.00255976	0.00161433	0.00233648	0.00134924	0.00278303	0.00187942
WNT100	-0.0833333	80	0.0024487	0.00157629	0.00226333	0.00134121	0.00263406	0.00181137
WNT100	0	85	0.00256372	0.00156344	0.00239989	0.00137969	0.00272755	0.00174719
WNT100	0.0833333	81	0.00239312	0.0015028	0.00224806	0.0013249	0.00253817	0.0016807
WNT100	0.166667	79	0.00253274	0.00152466	0.00232425	0.00134222	0.00274123	0.00170711
WNT100	0.25	82	0.00244593	0.00168671	0.00228997	0.00148354	0.00260189	0.00188989
WNT100	0.333333	79	0.00257224	0.00159614	0.00239184	0.00142619	0.00275264	0.00176609
WNT100	0.416667	79	0.00239628	0.00181439	0.00222519	0.00161778	0.00256738	0.00201101
WNT100	0.5	83	0.00266731	0.00185324	0.0025068	0.00165613	0.00282781	0.00205034
WNT100	0.583333	77	0.00271934	0.00187402	0.00251603	0.00165845	0.00292265	0.00208959
WNT100	0.666667	87	0.0026139	0.00193091	0.00244468	0.00172187	0.00278312	0.00213995
WNT100	0.75	87	0.00274447	0.00202439	0.00258317	0.00183865	0.00290578	0.00221013
WNT100	0.833333	90	0.00264747	0.00212979	0.00247547	0.00192528	0.00281946	0.0023343
WNT100	0.916667	92	0.00283555	0.00216332	0.00265678	0.0019894	0.00301432	0.00233724
WNT100	1	92	0.00281086	0.00235795	0.00258229	0.00214837	0.00303942	0.00256753
WNT100	1.08333	89	0.00295003	0.00240956	0.00274254	0.00220638	0.00315751	0.00261274
WNT100	1.16667	91	0.00282262	0.00247354	0.00260147	0.00228373	0.00304377	0.00266335
WNT100	1.25	89	0.00299649	0.00267048	0.00281451	0.00247097	0.00317846	0.00286999
WNT100	1.33333	89	0.00314134	0.00277003	0.00290569	0.00257467	0.00337699	0.00296538
WNT100	1.41667	94	0.00319207	0.00273451	0.00296701	0.002563	0.00341714	0.00290602
WNT100	1.5	87	0.00327271	0.00283327	0.00305858	0.00264638	0.00348685	0.00302017
WNT100	1.58333	93	0.00337386	0.00303284	0.00317731	0.00284687	0.00357041	0.00321881
WNT100	1.66667	88	0.0033791	0.00309371	0.00316599	0.00288949	0.00359222	0.00329793
WNT100	1.75	88	0.00336961	0.00329351	0.00314593	0.00302755	0.00359329	0.00355947
WNT100	1.83333	82	0.00338057	0.00322943	0.00316503	0.00301504	0.00359611	0.00344381
WNT100	1.91667	87	0.00344314	0.00334469	0.00322662	0.00313213	0.00365967	0.00355725
WNT100	2	85	0.00346366	0.00333092	0.00324119	0.00309883	0.00368613	0.00356301
WNT100	2.08333	94	0.00341417	0.00341459	0.00318749	0.00316775	0.00364086	0.00366143
WNT100	2.16667	89	0.0034786	0.00352402	0.00322394	0.00327375	0.00373327	0.00377429
WNT100	2.25	92	0.00363924	0.00347273	0.00334958	0.00323317	0.00392889	0.00371229
WNT100	2.33333	87	0.00364807	0.00347231	0.00340697	0.00324404	0.00388917	0.00370058
WNT100	2.41667	79	0.00335964	0.00349135	0.00313761	0.00325201	0.00358168	0.00373069
WNT100	2.5	86	0.00365967	0.00347747	0.00345192	0.00326626	0.00386742	0.00368867
WNT100	2.58333	88	0.00351059	0.00361955	0.00324309	0.00339178	0.00377809	0.00384732
WNT100	2.66667	92	0.00371672	0.00361112	0.00333684	0.00339642	0.0040966	0.00382582
WNT100	2.75	85	0.00366447	0.00358343	0.00335951	0.00340311	0.00396944	0.00376375
WNT100	2.83333	87	0.0037124	0.00364846	0.00344593	0.00344532	0.00397886	0.00385161
WNT100	2.91667	84	0.00375087	0.00370279	0.00344729	0.00352709	0.00405445	0.0038785
WNT100	3	92	0.00381042	0.0037623	0.00352202	0.00357895	0.00409882	0.00394564
WNT100	3.08333	85	0.00403816	0.00385954	0.00376442	0.00364104	0.00431189	0.00407804
WNT100	3.16667	87	0.00407851	0.00400502	0.00376817	0.00370693	0.00438886	0.00430311
WNT100	3.25	94	0.00406137	0.00404815	0.00378654	0.00381347	0.0043362	0.00428283
WNT100	3.33333	90	0.00395266	0.00393246	0.00370215	0.00371865	0.00420316	0.00414628
WNT100	3.41667	90	0.00392567	0.00402317	0.00369323	0.00381467	0.00415811	0.00423167
WNT100	3.5	90	0.0041221	0.00417955	0.00385359	0.00392835	0.00439062	0.00443074
WNT100	3.58333	83	0.00415429	0.00407186	0.0038812	0.00384134	0.00442738	0.00430237
WNT100	3.66667	81	0.00417604	0.0040807	0.00393224	0.00387863	0.00441984	0.00428277
WNT100	3.75	89	0.00427643	0.00420848	0.00397544	0.00401774	0.00457743	0.00439921
WNT100	3.83333	89	0.00416359	0.0043293	0.00389221	0.00408967	0.00443497	0.00456893
WNT100	3.91667	88	0.00449925	0.00433964	0.00422561	0.00411486	0.0047729	0.00456441
WNT100	4	91	0.00413285	0.00425493	0.00383007	0.00402637	0.00443562	0.00448348
WNT100	4.08333	88	0.00443559	0.00428773	0.00413048	0.00406336	0.0047407	0.0045121
WNT100	4.16667	84	0.0043789	0.00430455	0.00405962	0.00406878	0.00469817	0.00454033
WNT100	4.25	85	0.00427543	0.00422071	0.0039758	0.00401584	0.00457507	0.00442559
WNT100	4.33333	82	0.0044742	0.00429499	0.0042069	0.00408378	0.0047415	0.0045062
WNT100	4.41667	81	0.0044743	0.00429937	0.00419831	0.00408392	0.00475028	0.00451481
WNT100	4.5	88	0.0044706	0.0043645	0.00415515	0.00414315	0.00478605	0.00458584
WNT100	4.58333	89	0.00435665	0.00431832	0.00405938	0.00410277	0.00465392	0.00453387
WNT100	4.66667	81	0.00446463	0.00436965	0.00414056	0.00409186	0.0047887	0.00464744
WNT100	4.75	79	0.00440481	0.00429896	0.00409894	0.00404414	0.00471067	0.00455378
WNT100	4.83333	85	0.00464782	0.00432909	0.00429908	0.00410384	0.00499656	0.00455435
WNT100	4.91667	84	0.00446742	0.00444089	0.00417203	0.00418182	0.00476281	0.00469995
WNT100	5	82	0.00441945	0.00437971	0.00408263	0.00413861	0.00475626	0.0046208
WNT100	5.08333	80	0.00445877	0.00439801	0.00414823	0.00414817	0.00476932	0.00464785
WNT100	5.16667	81	0.00450172	0.00448249	0.00418661	0.00422331	0.00481684	0.00474167
WNT100	5.25	86	0.00449986	0.00447218	0.00418034	0.00420126	0.00481938	0.00474309
WNT100	5.33333	82	0.00449342	0.00439993	0.00414175	0.0041397	0.00484509	0.00466017
WNT100	5.41667	82	0.0047118	0.00442609	0.0043525	0.00415708	0.0050711	0.0046951
WNT100	5.5	79	0.00428111	0.0045304	0.00391941	0.00423712	0.00464282	0.00482369
WNT100	5.58333	88	0.00444973	0.0045874	0.00408423	0.00429476	0.00481522	0.00488004
WNT100	5.66667	84	0.00428836	0.00469931	0.00396095	0.00437278	0.00461577	0.00502583
WNT100	5.75	84	0.00430113	0.00458517	0.00396233	0.00427003	0.00463992	0.0049003
WNT100	5.83333	83	0.00464804	0.00460113	0.00430362	0.00427706	0.00499245	0.00492521
WNT100	5.91667	83	0.00451658	0.00455006	0.00416379	0.0042566	0.00486936	0.00484353
WNT100	6	84	0.00446441	0.00460199	0.00409026	0.00429472	0.00483855	0.00490925
WNT100	6.08333	85	0.00466528	0.00461869	0.00431582	0.00432356	0.00501473	0.00491382
WNT100	6.16667	84	0.00457047	0.00454549	0.00418238	0.00425631	0.00495856	0.00483468
WNT100	6.25	84	0.00452935	0.00459117	0.00417967	0.00430985	0.00487903	0.00487249
WNT100	6.33333	86	0.00451645	0.00443423	0.00418636	0.00414345	0.00484653	0.004725
WNT100	6.41667	88	0.00445348	0.00452338	0.00412572	0.00421946	0.00478123	0.00482731
WNT100	6.5	87	0.00466532	0.0045018	0.00423987	0.00418374	0.00509077	0.00481987
WNT100	6.58333	82	0.00461432	0.00444698	0.00426225	0.00413727	0.00496639	0.00475669
WNT100	6.66667	86	0.00441524	0.00436101	0.00405748	0.0040569	0.00477299	0.00466513
WNT100	6.75	82	0.00425516	0.00427265	0.00388937	0.00398608	0.00462094	0.00455921
WNT100	6.83333	80	0.00452041	0.00430783	0.00420622	0.00401385	0.00483461	0.00460181
WNT100	6.91667	82	0.00444728	0.00424427	0.00410621	0.00395208	0.00478836	0.00453646
WNT100	7	86	0.00442562	0.00442192	0.00412565	0.00407975	0.00472559	0.00476409
WNT100	7.08333	83	0.00440264	0.00452827	0.00412321	0.00414671	0.00468208	0.00490982
WNT100	7.16667	86	0.00429907	0.00443449	0.00403344	0.00408121	0.0045647	0.00478778
WNT100	7.25	85	0.00424868	0.00436881	0.00399412	0.00402939	0.00450324	0.00470823
WNT100	7.33333	87	0.00427659	0.00432029	0.00400718	0.00399904	0.00454601	0.00464155
WNT100	7.41667	86	0.00432234	0.00428795	0.00404732	0.00395683	0.00459735	0.00461907
WNT100	7.5	91	0.00429415	0.00418162	0.00402015	0.003869	0.00456815	0.00449425
WNT100	7.58333	87	0.0042784	0.00419135	0.00401448	0.0038736	0.00454231	0.0045091
WNT100	7.66667	84	0.00427974	0.00422096	0.00402558	0.00387997	0.00453389	0.00456194
WNT100	7.75	90	0.0041733	0.00419503	0.00386185	0.0038726	0.00448476	0.00451746
WNT100	7.83333	91	0.00422623	0.00418402	0.00396863	0.00387464	0.00448384	0.0044934
WNT100	7.91667	88	0.00406449	0.00412247	0.00378642	0.00379811	0.00434257	0.00444683
WNT100	8	91	0.00431766	0.00400618	0.00403994	0.00370715	0.00459538	0.00430521
WNT100	8.08333	86	0.00431066	0.00409641	0.00402514	0.0037788	0.00459618	0.00441403
WNT100	8.16667	90	0.00411925	0.00412475	0.00382651	0.00383971	0.00441199	0.00440979
WNT100	8.25	85	0.00417026	0.00402485	0.00390602	0.00374462	0.00443449	0.00430509
WNT100	8.33333	91	0.00418255	0.00407071	0.00390657	0.00378313	0.00445853	0.0043583
WNT100	8.41667	92	0.00430158	0.00416404	0.00401918	0.00384091	0.00458397	0.00448717
WNT100	8.5	91	0.00424386	0.00417028	0.00397217	0.00384874	0.00451554	0.00449181
WNT100	8.58333	90	0.00424425	0.00421468	0.00396193	0.00386028	0.00452657	0.00456908
WNT100	8.66667	93	0.00420814	0.00423465	0.00390948	0.00388422	0.00450681	0.00458509
WNT100	8.75	89	0.00415271	0.00435266	0.00389766	0.00398695	0.00440777	0.00471836
WNT100	8.83333	89	0.00416593	0.00430698	0.00391738	0.00395091	0.00441449	0.00466304
WNT100	8.91667	87	0.00413813	0.0042649	0.00387174	0.00389753	0.00440453	0.00463227
WNT100	9	92	0.00411834	0.00429435	0.00382793	0.00393172	0.00440876	0.00465697
WNT100	9.08333	92	0.00407196	0.00407079	0.00373582	0.00373228	0.0044081	0.0044093
WNT100	9.16667	92	0.00401884	0.00398632	0.00373931	0.00365402	0.00429837	0.00431863
WNT100	9.25	94	0.00410088	0.00404177	0.00382369	0.00371194	0.00437806	0.00437161
WNT100	9.33333	94	0.00400752	0.00396798	0.00373964	0.00365264	0.0042754	0.00428333
WNT100	9.41667	93	0.00405917	0.0039652	0.00380509	0.00363523	0.00431324	0.00429516
WNT100	9.5	95	0.00393846	0.00401375	0.00367677	0.00367668	0.00420015	0.00435081
WNT100	9.58333	92	0.00388902	0.0040288	0.00361313	0.00368771	0.0041649	0.00436989
WNT100	9.66667	91	0.00402415	0.00397986	0.00377065	0.00365245	0.00427766	0.00430726
WNT100	9.75	103	0.00386409	0.00396677	0.00360118	0.00365147	0.004127	0.00428207
WNT100	9.83333	94	0.00395901	0.00394323	0.00369382	0.00361547	0.0042242	0.00427098
WNT100	9.91667	92	0.0038757	0.00371296	0.00363103	0.0034262	0.00412038	0.00399972
WNT100	10	97	0.00378726	0.00375654	0.00352452	0.00342064	0.00405001	0.00409245
WNT100	10.0833	90	0.00403056	0.00381004	0.00374202	0.00345937	0.0043191	0.0041607
WNT100	10.1667	91	0.0037247	0.00371588	0.00346658	0.00338358	0.00398282	0.00404817
WNT100	10.25	97	0.00375757	0.00361077	0.00347304	0.00327618	0.00404211	0.00394537
WNT100	10.3333	90	0.00383401	0.00349954	0.00346879	0.00316922	0.00419924	0.00382986
WNT100	10.4167	93	0.003861	0.00356219	0.00358374	0.00325862	0.00413825	0.00386577
WNT100	10.5	93	0.00374009	0.00355454	0.0034614	0.0032566	0.00401877	0.00385248
WNT100	10.5833	95	0.00381765	0.00361049	0.00354555	0.00332397	0.00408974	0.00389701
WNT100	10.6667	90	0.00388984	0.00358543	0.00363037	0.00327125	0.00414931	0.0038996
WNT100	10.75	91	0.00378218	0.00362018	0.00348245	0.00332076	0.0040819	0.00391959
WNT100	10.8333	89	0.003792	0.00356006	0.00352523	0.00325974	0.00405877	0.00386038
WNT100	10.9167	95	0.00378326	0.00359505	0.00352135	0.00330492	0.00404517	0.00388519
WNT100	11	92	0.00387396	0.00353132	0.00358785	0.00323616	0.00416007	0.00382647
WNT100	11.0833	91	0.00379899	0.00351155	0.00351401	0.00320225	0.00408397	0.00382085
WNT100	11.1667	89	0.00368321	0.00343161	0.00339247	0.00312465	0.00397396	0.00373856
WNT100	11.25	89	0.0036577	0.00344438	0.00339115	0.00312184	0.00392425	0.00376692
WNT100	11.3333	88	0.00377251	0.00340624	0.00350563	0.00308644	0.0040394	0.00372605
WNT100	11.4167	91	0.00371587	0.00331891	0.00343847	0.0030146	0.00399326	0.00362322
WNT100	11.5	93	0.00375809	0.00338001	0.00348559	0.00307152	0.0040306	0.0036885
WNT100	11.5833	92	0.00371181	0.0032962	0.00344152	0.00298052	0.00398209	0.00361187
WNT100	11.6667	93	0.00380536	0.00334036	0.00353551	0.0030314	0.0040752	0.00364933
WNT100	11.75	94	0.00375772	0.00341442	0.0034805	0.00309536	0.00403494	0.00373348
WNT100	11.8333	93	0.00382803	0.00350268	0.00349968	0.00316688	0.00415638	0.00383847
WNT100	11.9167	92	0.0035379	0.00340239	0.00325377	0.00308907	0.00382203	0.00371572
WNT100	12	90	0.00358386	0.00341142	0.00327929	0.003087	0.00388843	0.00373585
DMSO	-0.583333	88	0.00266577	0.00152667	0.00220643	0.00135743	0.00312511	0.00169591
DMSO	-0.5	90	0.00256254	0.00157769	0.00238345	0.00136431	0.00274164	0.00179106
DMSO	-0.416667	91	0.00256916	0.00153343	0.00237823	0.00133572	0.0027601	0.00173114
DMSO	-0.333333	92	0.0026231	0.00165564	0.00240857	0.0014174	0.00283763	0.00189388
DMSO	-0.25	95	0.00243145	0.00166814	0.0022246	0.00143176	0.0026383	0.00190453
DMSO	-0.166667	95	0.00244577	0.00145091	0.00216203	0.00128422	0.00272952	0.0016176
DMSO	-0.0833333	92	0.00254531	0.00151691	0.00234788	0.0013374	0.00274274	0.00169641
DMSO	0	93	0.00240618	0.00153932	0.00223534	0.00133693	0.00257701	0.00174171
DMSO	0.0833333	91	0.00240213	0.00163367	0.00220125	0.00142618	0.00260302	0.00184115
DMSO	0.166667	90	0.00242165	0.00154497	0.00221302	0.00129889	0.00263028	0.00179105
DMSO	0.25	86	0.0025078	0.0015369	0.00231244	0.00136504	0.00270316	0.00170876
DMSO	0.333333	96	0.00246055	0.0016482	0.00226461	0.00145991	0.00265648	0.0018365
DMSO	0.416667	91	0.00248686	0.00157604	0.00232185	0.00139146	0.00265187	0.00176062
DMSO	0.5	96	0.00243753	0.00162356	0.00227692	0.00143602	0.00259814	0.0018111
DMSO	0.583333	95	0.00242934	0.00158571	0.00223868	0.00140006	0.00261999	0.00177136
DMSO	0.666667	89	0.00245899	0.0015949	0.00227326	0.00139605	0.00264472	0.00179375
DMSO	0.75	95	0.00231898	0.00156937	0.00215587	0.00137548	0.00248209	0.00176327
DMSO	0.833333	90	0.00245434	0.00150744	0.00226031	0.00132831	0.00264837	0.00168656
DMSO	0.916667	85	0.00237881	0.0016276	0.00222135	0.00140458	0.00253626	0.00185062
DMSO	1	93	0.00241723	0.00164016	0.00223492	0.00144591	0.00259954	0.00183441
DMSO	1.08333	93	0.00230617	0.00164174	0.00215592	0.0014493	0.00245641	0.00183417
DMSO	1.16667	93	0.00261012	0.00154569	0.00226878	0.00137856	0.00295146	0.00171283
DMSO	1.25	94	0.00249859	0.00161519	0.00231266	0.00142325	0.00268452	0.00180712
DMSO	1.33333	89	0.00247937	0.00167045	0.002271	0.00146455	0.00268774	0.00187635
DMSO	1.41667	87	0.00247601	0.0015682	0.00229078	0.00137755	0.00266124	0.00175885
DMSO	1.5	84	0.0025712	0.00161199	0.00232844	0.00140487	0.00281397	0.00181912
DMSO	1.58333	92	0.00252698	0.00162197	0.00235802	0.00143558	0.00269594	0.00180837
DMSO	1.66667	93	0.00248111	0.00165849	0.00231994	0.00147559	0.00264228	0.0018414
DMSO	1.75	89	0.00246656	0.00158464	0.00231708	0.00140424	0.00261604	0.00176503
DMSO	1.83333	103	0.00249589	0.00159282	0.00234101	0.00141296	0.00265077	0.00177268
DMSO	1.91667	94	0.00246923	0.00164551	0.00232305	0.00141194	0.00261541	0.00187908
DMSO	2	95	0.00231715	0.0016062	0.00215831	0.00141114	0.00247599	0.00180126
DMSO	2.08333	98	0.00245665	0.00158578	0.00225508	0.00138951	0.00265822	0.00178205
DMSO	2.16667	104	0.00245437	0.00151826	0.00231774	0.00134154	0.00259101	0.00169498
DMSO	2.25	108	0.00236089	0.00145284	0.00217941	0.00130009	0.00254237	0.00160558
DMSO	2.33333	100	0.00223139	0.00145579	0.00202544	0.00128976	0.00243733	0.00162182
DMSO	2.41667	106	0.00225737	0.00149847	0.00210263	0.00133303	0.00241211	0.0016639
DMSO	2.5	105	0.00212085	0.00146819	0.00199106	0.00130045	0.00225064	0.00163592
DMSO	2.58333	108	0.00223095	0.00150606	0.00205152	0.00133011	0.00241039	0.00168201
DMSO	2.66667	103	0.00225022	0.00156948	0.00205578	0.00135994	0.00244467	0.00177903
DMSO	2.75	97	0.00230902	0.00154355	0.00213621	0.00134801	0.00248184	0.00173909
DMSO	2.83333	94	0.00221587	0.00150288	0.00204993	0.00131956	0.00238182	0.0016862
DMSO	2.91667	94	0.00237921	0.00146649	0.0021957	0.00130627	0.00256273	0.00162671
DMSO	3	96	0.00226406	0.00146969	0.00211606	0.00129743	0.00241207	0.00164196
DMSO	3.08333	94	0.00225999	0.0014426	0.00213015	0.0012526	0.00238983	0.0016326
DMSO	3.16667	96	0.00226053	0.00147545	0.00213461	0.00128392	0.00238646	0.00166698
DMSO	3.25	96	0.00222633	0.00149634	0.00207126	0.00131187	0.0023814	0.00168082
DMSO	3.33333	101	0.00215026	0.00142081	0.00201994	0.00124146	0.00228058	0.00160016
DMSO	3.41667	94	0.00231253	0.00142263	0.00213378	0.00123747	0.00249127	0.00160778
DMSO	3.5	97	0.00220938	0.0014069	0.00208696	0.0012347	0.00233181	0.0015791
DMSO	3.58333	96	0.00226624	0.00136587	0.00204026	0.0011841	0.00249222	0.00154763
DMSO	3.66667	92	0.0022264	0.001353	0.00208194	0.00117043	0.00237085	0.00153557
DMSO	3.75	94	0.0021859	0.00141758	0.00203858	0.00122738	0.00233323	0.00160777
DMSO	3.83333	97	0.00220841	0.00142942	0.00204679	0.00123743	0.00237003	0.00162142
DMSO	3.91667	102	0.00219603	0.00137957	0.00205232	0.00120922	0.00233974	0.00154992
DMSO	4	94	0.00233911	0.00154209	0.00204988	0.0013096	0.00262835	0.00177459
DMSO	4.08333	101	0.0022184	0.00146598	0.00206375	0.00126308	0.00237305	0.00166887
DMSO	4.16667	100	0.00216812	0.00140856	0.00204994	0.00121357	0.00228631	0.00160355
DMSO	4.25	100	0.00213255	0.00129819	0.00200365	0.00113417	0.00226144	0.00146222
DMSO	4.33333	106	0.00221555	0.00144053	0.00210241	0.0012544	0.00232868	0.00162665
DMSO	4.41667	104	0.00217267	0.001362	0.00203698	0.00118889	0.00230835	0.00153512
DMSO	4.5	105	0.0022207	0.00146173	0.00206908	0.00126806	0.00237231	0.00165541
DMSO	4.58333	102	0.00218763	0.00137875	0.00203802	0.00121291	0.00233724	0.0015446
DMSO	4.66667	100	0.00213987	0.00136627	0.00201261	0.00122394	0.00226714	0.0015086
DMSO	4.75	98	0.00218881	0.00138744	0.00203773	0.00121587	0.00233989	0.001559
DMSO	4.83333	103	0.00210967	0.00137212	0.00197931	0.00121955	0.00224003	0.00152469
DMSO	4.91667	100	0.00233052	0.00135029	0.00219337	0.00120149	0.00246768	0.00149909
DMSO	5	102	0.00215942	0.00137875	0.00203335	0.00122003	0.00228549	0.00153747
DMSO	5.08333	103	0.00223157	0.00138231	0.00208807	0.00123231	0.00237506	0.0015323
DMSO	5.16667	109	0.00216974	0.00143148	0.00205304	0.0012437	0.00228644	0.00161927
DMSO	5.25	104	0.00213295	0.001424	0.00201317	0.00123675	0.00225273	0.00161126
DMSO	5.33333	111	0.00226139	0.0014178	0.00204305	0.00125664	0.00247972	0.00157897
DMSO	5.41667	110	0.00223509	0.00142106	0.00209232	0.00125885	0.00237786	0.00158327
DMSO	5.5	106	0.00217843	0.00138672	0.00203953	0.00122444	0.00231733	0.00154899
DMSO	5.58333	110	0.00215924	0.00137414	0.0020302	0.0012218	0.00228828	0.00152648
DMSO	5.66667	110	0.00216336	0.00143477	0.00202178	0.00125918	0.00230494	0.00161036
DMSO	5.75	111	0.0020961	0.00139197	0.00198624	0.0012185	0.00220595	0.00156544
DMSO	5.83333	111	0.00221647	0.00137093	0.00208552	0.00121646	0.00234742	0.00152539
DMSO	5.91667	108	0.00215806	0.00137655	0.00202396	0.00121536	0.00229217	0.00153774
DMSO	6	105	0.00210259	0.00129855	0.00197142	0.00114714	0.00223375	0.00144996
DMSO	6.08333	114	0.00216546	0.00140513	0.00196705	0.00124469	0.00236388	0.00156557
DMSO	6.16667	108	0.00211427	0.00139286	0.00197629	0.00121321	0.00225225	0.00157252
DMSO	6.25	114	0.00209049	0.00133277	0.00196932	0.00120011	0.00221166	0.00146543
DMSO	6.33333	112	0.00207888	0.00139416	0.00193901	0.00123533	0.00221875	0.00155299
DMSO	6.41667	107	0.00205984	0.00136101	0.00188669	0.00120177	0.00223299	0.00152025
DMSO	6.5	113	0.00211835	0.00139512	0.00200291	0.00123493	0.00223379	0.0015553
DMSO	6.58333	103	0.00205323	0.00136651	0.00193301	0.00120889	0.00217344	0.00152412
DMSO	6.66667	108	0.00205371	0.0013656	0.00193353	0.00121484	0.0021739	0.00151635
DMSO	6.75	105	0.00207803	0.00133198	0.00194342	0.00118387	0.00221263	0.0014801
DMSO	6.83333	107	0.00204661	0.00135885	0.00193032	0.00119742	0.00216291	0.00152029
DMSO	6.91667	116	0.00205505	0.00135721	0.00193833	0.00120902	0.00217176	0.0015054
DMSO	7	111	0.00202515	0.00133225	0.0019198	0.00117465	0.0021305	0.00148986
DMSO	7.08333	114	0.00199822	0.00130138	0.00189509	0.00115973	0.00210134	0.00144303
DMSO	7.16667	112	0.00191485	0.00134204	0.00181225	0.00118255	0.00201744	0.00150152
DMSO	7.25	113	0.00197216	0.0012766	0.00188045	0.00113657	0.00206387	0.00141663
DMSO	7.33333	104	0.0019268	0.00124246	0.00183229	0.00111439	0.00202131	0.00137053
DMSO	7.41667	106	0.00198345	0.00122064	0.00188304	0.00109307	0.00208385	0.0013482
DMSO	7.5	106	0.00198404	0.00123188	0.00188433	0.0011001	0.00208375	0.00136365
DMSO	7.58333	107	0.00200537	0.00120768	0.0019084	0.00107696	0.00210235	0.00133841
DMSO	7.66667	106	0.00200644	0.00123583	0.00184881	0.0010941	0.00216406	0.00137756
DMSO	7.75	111	0.00202112	0.0012048	0.00190326	0.00107411	0.00213897	0.00133548
DMSO	7.83333	107	0.00193878	0.00122232	0.00184093	0.00109076	0.00203663	0.00135387
DMSO	7.91667	111	0.00205242	0.00129064	0.00193031	0.00114391	0.00217452	0.00143737
DMSO	8	109	0.00203311	0.00125687	0.00190894	0.00110708	0.00215727	0.00140665
DMSO	8.08333	115	0.00199678	0.00119394	0.0019061	0.00107112	0.00208746	0.00131676
DMSO	8.16667	115	0.00193815	0.0012083	0.00184711	0.00108813	0.00202918	0.00132846
DMSO	8.25	113	0.00198004	0.00127806	0.0018883	0.00115148	0.00207179	0.00140464
DMSO	8.33333	114	0.00192247	0.00128819	0.00183109	0.00113867	0.00201386	0.0014377
DMSO	8.41667	119	0.00187074	0.00128349	0.00177909	0.00111682	0.00196239	0.00145017
DMSO	8.5	116	0.00192047	0.00126896	0.00182512	0.00112864	0.00201582	0.00140928
DMSO	8.58333	111	0.00194119	0.00117031	0.00184279	0.00105142	0.00203959	0.00128921
DMSO	8.66667	115	0.00195098	0.00113857	0.00183703	0.00101992	0.00206494	0.00125723
DMSO	8.75	119	0.00187203	0.00115047	0.001759	0.00102107	0.00198506	0.00127986
DMSO	8.83333	122	0.00199867	0.00124598	0.00190283	0.00109735	0.00209452	0.00139461
DMSO	8.91667	121	0.00192212	0.00122023	0.00183926	0.00108221	0.00200499	0.00135825
DMSO	9	122	0.00190654	0.001209	0.00182642	0.00107907	0.00198666	0.00133894
DMSO	9.08333	124	0.00182501	0.00123712	0.00173545	0.00109047	0.00191457	0.00138377
DMSO	9.16667	118	0.00195543	0.00126453	0.0018444	0.00111595	0.00206646	0.00141312
DMSO	9.25	122	0.00189976	0.00121131	0.00179633	0.00107448	0.00200318	0.00134815
DMSO	9.33333	115	0.00202026	0.00113964	0.00191327	0.00101569	0.00212725	0.00126359
DMSO	9.41667	115	0.00191652	0.00116707	0.00180921	0.00103157	0.00202384	0.00130256
DMSO	9.5	123	0.00194201	0.0011924	0.00183723	0.00106841	0.00204678	0.00131639
DMSO	9.58333	121	0.0018757	0.00117753	0.00176157	0.00105182	0.00198983	0.00130324
DMSO	9.66667	119	0.00194033	0.00119948	0.00182745	0.00107696	0.0020532	0.001322
DMSO	9.75	128	0.00190369	0.00115431	0.00180386	0.00104156	0.00200351	0.00126705
DMSO	9.83333	126	0.00187913	0.00113993	0.00178163	0.00102816	0.00197663	0.00125171
DMSO	9.91667	133	0.00182733	0.00111604	0.00173527	0.00101085	0.00191938	0.00122123
DMSO	10	125	0.00185274	0.00112033	0.00176343	0.00101199	0.00194206	0.00122867
DMSO	10.0833	124	0.00184942	0.00110105	0.00176009	0.000991195	0.00193875	0.00121091
DMSO	10.1667	123	0.00190794	0.00111378	0.00180513	0.000995014	0.00201075	0.00123255
DMSO	10.25	121	0.00191452	0.00109594	0.00180185	0.000977683	0.0020272	0.0012142
DMSO	10.3333	127	0.00193826	0.00111113	0.00182073	0.000994743	0.00205579	0.00122752
DMSO	10.4167	131	0.00188111	0.00115215	0.00177223	0.00102392	0.00198999	0.00128037
DMSO	10.5	134	0.00188014	0.00109451	0.00176217	0.000980821	0.0019981	0.00120819
DMSO	10.5833	135	0.00188399	0.00112741	0.00178744	0.00101615	0.00198054	0.00123866
DMSO	10.6667	131	0.00193826	0.00111511	0.00183359	0.00101051	0.00204292	0.00121971
DMSO	10.75	126	0.00190884	0.00111382	0.00179232	0.00100248	0.00202536	0.00122515
DMSO	10.8333	131	0.00181025	0.00113972	0.00171661	0.0010234	0.00190389	0.00125604
DMSO	10.9167	136	0.00183501	0.00114017	0.00174468	0.00102622	0.00192534	0.00125412
DMSO	11	129	0.00185235	0.00108855	0.00175749	0.000984216	0.00194722	0.00119288
DMSO	11.0833	131	0.00183396	0.00112254	0.0017446	0.00100602	0.00192331	0.00123906
DMSO	11.1667	134	0.00183688	0.00115285	0.00174503	0.00103384	0.00192874	0.00127186
DMSO	11.25	141	0.00181699	0.00110624	0.00173017	0.000996987	0.00190381	0.0012155
DMSO	11.3333	133	0.00191513	0.00114399	0.00182172	0.00103919	0.00200853	0.00124879
DMSO	11.4167	129	0.00189582	0.00114602	0.00180344	0.00104391	0.0019882	0.00124812
DMSO	11.5	132	0.0018954	0.00110591	0.00180013	0.00100496	0.00199067	0.00120685
DMSO	11.5833	131	0.00191759	0.00114762	0.00182918	0.00103686	0.00200601	0.00125838
DMSO	11.6667	138	0.00183636	0.00115193	0.00174923	0.00103822	0.0019235	0.00126564
DMSO	11.75	137	0.00178553	0.00118894	0.00169633	0.00106034	0.00187474	0.00131754
DMSO	11.8333	137	0.0018924	0.00117224	0.00177631	0.00103921	0.0020085	0.00130526
DMSO	11.9167	141	0.00185633	0.00110634	0.00176289	0.000997936	0.00194978	0.00121475
DMSO	12	144	0.00190365	0.00112448	0.00179106	0.00101309	0.00201624	0.00123587
CHIR4	-0.583333	81	0.0023517	0.00133905	0.00219359	0.00119469	0.00250981	0.00148342
CHIR4	-0.5	84	0.00233314	0.00127789	0.0021764	0.00115484	0.00248988	0.00140094
CHIR4	-0.416667	85	0.00226133	0.00130406	0.00213669	0.00117073	0.00238597	0.00143739
CHIR4	-0.333333	86	0.00223086	0.0013441	0.0020958	0.00120364	0.00236592	0.00148456
CHIR4	-0.25	89	0.00221673	0.00131491	0.002093	0.00117935	0.00234047	0.00145048
CHIR4	-0.166667	84	0.00228353	0.00131322	0.00211428	0.00116318	0.00245277	0.00146326
CHIR4	-0.0833333	88	0.00214897	0.00136091	0.00203091	0.00120625	0.00226703	0.00151556
CHIR4	0	87	0.00217722	0.00145618	0.0020356	0.00126555	0.00231885	0.0016468
CHIR4	0.0833333	88	0.00235598	0.00144274	0.00220171	0.00125065	0.00251025	0.00163484
CHIR4	0.166667	90	0.00245788	0.0014842	0.00228574	0.0013052	0.00263002	0.00166321
CHIR4	0.25	88	0.00237067	0.00156326	0.00221806	0.00137574	0.00252328	0.00175079
CHIR4	0.333333	91	0.00247249	0.00166867	0.00231593	0.00146249	0.00262905	0.00187485
CHIR4	0.416667	90	0.00255909	0.00169835	0.00238793	0.00148691	0.00273025	0.0019098
CHIR4	0.5	87	0.00258536	0.00171039	0.00239581	0.00151089	0.00277491	0.00190989
CHIR4	0.583333	94	0.00257952	0.00184506	0.0024129	0.00164086	0.00274614	0.00204926
CHIR4	0.666667	86	0.00275394	0.00176433	0.00254689	0.00158708	0.00296099	0.00194159
CHIR4	0.75	93	0.00268862	0.00180522	0.00251092	0.00164527	0.00286631	0.00196517
CHIR4	0.833333	91	0.0027007	0.001793	0.00255507	0.00166928	0.00284633	0.00191672
CHIR4	0.916667	94	0.00276529	0.00189391	0.00258722	0.00176492	0.00294336	0.0020229
CHIR4	1	95	0.00271421	0.00196535	0.00257558	0.00181807	0.00285283	0.00211263
CHIR4	1.08333	92	0.00276625	0.00200297	0.00261683	0.00186682	0.00291568	0.00213913
CHIR4	1.16667	97	0.00284941	0.00202748	0.0026704	0.00189226	0.00302841	0.0021627
CHIR4	1.25	95	0.0029028	0.00206666	0.00267938	0.00193305	0.00312622	0.00220027
CHIR4	1.33333	96	0.00297541	0.00221151	0.00278673	0.00205806	0.00316409	0.00236497
CHIR4	1.41667	98	0.00284729	0.00234359	0.00266337	0.00215644	0.00303121	0.00253075
CHIR4	1.5	91	0.00311139	0.0024392	0.00286398	0.00228674	0.00335881	0.00259166
CHIR4	1.58333	93	0.00301355	0.00236717	0.00284215	0.00222081	0.00318495	0.00251352
CHIR4	1.66667	101	0.00321456	0.0024445	0.0029858	0.00229402	0.00344332	0.00259498
CHIR4	1.75	95	0.00305982	0.00247153	0.00288645	0.00232616	0.00323318	0.00261691
CHIR4	1.83333	95	0.00303155	0.00255477	0.00281902	0.00237941	0.00324407	0.00273014
CHIR4	1.91667	98	0.00315298	0.00268232	0.00295192	0.00250866	0.00335404	0.00285598
CHIR4	2	94	0.00308762	0.0027419	0.00289659	0.00255994	0.00327865	0.00292386
CHIR4	2.08333	99	0.00321254	0.00272882	0.00303495	0.00257606	0.00339013	0.00288159
CHIR4	2.16667	99	0.00311446	0.00281539	0.00290023	0.00265115	0.00332869	0.00297962
CHIR4	2.25	101	0.00307245	0.00276209	0.00287092	0.00259934	0.00327397	0.00292483
CHIR4	2.33333	95	0.00321897	0.00281487	0.00303119	0.00265348	0.00340676	0.00297627
CHIR4	2.41667	96	0.0032431	0.00289348	0.00306164	0.00272239	0.00342456	0.00306457
CHIR4	2.5	94	0.00321426	0.00288972	0.00302112	0.00272262	0.00340741	0.00305683
CHIR4	2.58333	93	0.00325656	0.0029493	0.00304734	0.00275031	0.00346578	0.0031483
CHIR4	2.66667	98	0.00330829	0.00300711	0.00308827	0.00280285	0.00352832	0.00321136
CHIR4	2.75	93	0.00330006	0.00296035	0.00309924	0.00278884	0.00350088	0.00313187
CHIR4	2.83333	99	0.0032856	0.00301476	0.00305423	0.00282163	0.00351696	0.00320789
CHIR4	2.91667	95	0.00327549	0.00299916	0.00303436	0.00281626	0.00351662	0.00318206
CHIR4	3	90	0.00338543	0.00303784	0.00311167	0.00284332	0.00365918	0.00323236
CHIR4	3.08333	91	0.003264	0.00310314	0.00305982	0.0029227	0.00346817	0.00328358
CHIR4	3.16667	89	0.00331559	0.00309128	0.00308448	0.00291554	0.00354669	0.00326702
CHIR4	3.25	93	0.00347883	0.00311793	0.00325033	0.00293281	0.00370733	0.00330305
CHIR4	3.33333	95	0.0032179	0.00311925	0.00298745	0.00293618	0.00344835	0.00330231
CHIR4	3.41667	94	0.00333415	0.00321987	0.003113	0.00302568	0.00355529	0.00341407
CHIR4	3.5	95	0.00340242	0.00328564	0.00316984	0.00309192	0.00363499	0.00347937
CHIR4	3.58333	95	0.00352561	0.00326601	0.00331201	0.00307135	0.00373921	0.00346066
CHIR4	3.66667	95	0.00352294	0.00322977	0.00327626	0.00304142	0.00376961	0.00341813
CHIR4	3.75	93	0.00350115	0.00324361	0.0032548	0.00305045	0.00374751	0.00343676
CHIR4	3.83333	93	0.00367024	0.00331293	0.00341012	0.00311902	0.00393035	0.00350684
CHIR4	3.91667	90	0.00358442	0.0033332	0.00332284	0.00313674	0.00384599	0.00352966
CHIR4	4	91	0.00362336	0.00334026	0.00335409	0.00313423	0.00389263	0.00354628
CHIR4	4.08333	87	0.00360414	0.00336705	0.00331224	0.00315762	0.00389604	0.00357648
CHIR4	4.16667	89	0.0037625	0.00333494	0.00351846	0.00312212	0.00400655	0.00354777
CHIR4	4.25	85	0.00371705	0.0033802	0.00347212	0.0031486	0.00396197	0.00361179
CHIR4	4.33333	89	0.00373897	0.003361	0.00347931	0.00313648	0.00399862	0.00358552
CHIR4	4.41667	83	0.00383826	0.00344312	0.00353341	0.00321238	0.00414311	0.00367386
CHIR4	4.5	86	0.00384046	0.00346649	0.00356227	0.00322983	0.00411866	0.00370316
CHIR4	4.58333	85	0.00388516	0.00343857	0.00357777	0.00318966	0.00419254	0.00368747
CHIR4	4.66667	88	0.0038665	0.00338448	0.00353979	0.00314687	0.00419321	0.00362208
CHIR4	4.75	89	0.00377447	0.00352665	0.00347771	0.00329102	0.00407124	0.00376228
CHIR4	4.83333	91	0.00372026	0.00352141	0.00343143	0.00325135	0.00400908	0.00379147
CHIR4	4.91667	88	0.00382098	0.00342058	0.0035199	0.0031777	0.00412205	0.00366347
CHIR4	5	90	0.00384218	0.00352989	0.00351672	0.00325718	0.00416764	0.00380261
CHIR4	5.08333	90	0.00383784	0.0034711	0.00355741	0.00321586	0.00411828	0.00372634
CHIR4	5.16667	93	0.00370855	0.00348521	0.00343331	0.00322414	0.0039838	0.00374629
CHIR4	5.25	91	0.00366442	0.00349759	0.00336453	0.00323675	0.00396432	0.00375843
CHIR4	5.33333	89	0.00376735	0.0034715	0.00344543	0.00320659	0.00408926	0.00373641
CHIR4	5.41667	82	0.00385574	0.00342114	0.00352994	0.00316046	0.00418154	0.00368182
CHIR4	5.5	81	0.00366517	0.00333634	0.00333018	0.00308096	0.00400016	0.00359171
CHIR4	5.58333	82	0.00375728	0.00339974	0.00347432	0.0031252	0.00404024	0.00367428
CHIR4	5.66667	84	0.00360529	0.00336842	0.00331678	0.00311196	0.0038938	0.00362488
CHIR4	5.75	81	0.00367488	0.00331596	0.00339095	0.0030556	0.00395881	0.00357631
CHIR4	5.83333	80	0.00369887	0.00336338	0.00342789	0.00309703	0.00396986	0.00362974
CHIR4	5.91667	83	0.00346978	0.00331706	0.003207	0.00307328	0.00373256	0.00356084
CHIR4	6	89	0.00360516	0.00333614	0.00335461	0.00307103	0.00385572	0.00360124
CHIR4	6.08333	85	0.00340862	0.0032664	0.00312832	0.00301399	0.00368892	0.0035188
CHIR4	6.16667	83	0.00355269	0.00334052	0.00327317	0.00306599	0.0038322	0.00361505
CHIR4	6.25	85	0.00351174	0.00328133	0.00322582	0.00302205	0.00379766	0.00354061
CHIR4	6.33333	83	0.00343829	0.00320731	0.00317088	0.00294417	0.0037057	0.00347044
CHIR4	6.41667	88	0.00339171	0.0031844	0.00309642	0.00291542	0.00368701	0.00345339
CHIR4	6.5	85	0.00356206	0.00324827	0.00330013	0.00296968	0.00382399	0.00352686
CHIR4	6.58333	85	0.00350984	0.00329459	0.00322795	0.00301853	0.00379173	0.00357066
CHIR4	6.66667	81	0.00355746	0.00316621	0.00326833	0.00288756	0.0038466	0.00344486
CHIR4	6.75	89	0.00342546	0.00321344	0.00317044	0.00293435	0.00368048	0.00349252
CHIR4	6.83333	82	0.00336802	0.0031062	0.00310347	0.0028283	0.00363257	0.00338411
CHIR4	6.91667	83	0.0034103	0.0030962	0.00313041	0.00282164	0.00369019	0.00337077
CHIR4	7	90	0.00324798	0.00310843	0.00297794	0.0028364	0.00351802	0.00338046
CHIR4	7.08333	90	0.00339827	0.00319987	0.00309216	0.00290868	0.00370439	0.00349107
CHIR4	7.16667	88	0.00325268	0.00319068	0.00298271	0.00291492	0.00352266	0.00346644
CHIR4	7.25	89	0.00346343	0.00327235	0.00317458	0.00299211	0.00375228	0.00355258
CHIR4	7.33333	88	0.00330747	0.00325049	0.00303596	0.00296498	0.00357898	0.00353599
CHIR4	7.41667	89	0.00313356	0.00321022	0.00286264	0.00292828	0.00340448	0.00349215
CHIR4	7.5	87	0.00332429	0.00325478	0.00305426	0.00296593	0.00359433	0.00354364
CHIR4	7.58333	85	0.00335654	0.00312342	0.00307672	0.00285119	0.00363636	0.00339566
CHIR4	7.66667	83	0.00326849	0.00319442	0.00303657	0.00288403	0.00350041	0.00350482
CHIR4	7.75	88	0.00327013	0.00313275	0.00302031	0.00284115	0.00351995	0.00342436
CHIR4	7.83333	90	0.00331851	0.0031151	0.00307872	0.00283883	0.00355831	0.00339138
CHIR4	7.91667	87	0.00326109	0.00314741	0.00299513	0.00285347	0.00352704	0.00344134
CHIR4	8	86	0.00325264	0.00314478	0.00294756	0.00284952	0.00355771	0.00344005
CHIR4	8.08333	83	0.00324975	0.00321843	0.00296964	0.00289453	0.00352986	0.00354232
CHIR4	8.16667	79	0.00321969	0.0030961	0.00294749	0.00278485	0.00349189	0.00340734
CHIR4	8.25	76	0.0031102	0.00317374	0.00282979	0.00285323	0.0033906	0.00349426
CHIR4	8.33333	78	0.0031149	0.00309316	0.00284023	0.00278907	0.00338957	0.00339724
CHIR4	8.41667	80	0.00320669	0.00315783	0.0029054	0.0028354	0.00350798	0.00348025
CHIR4	8.5	78	0.00317545	0.00294557	0.00289377	0.00266	0.00345714	0.00323113
CHIR4	8.58333	82	0.00309905	0.0031169	0.00280838	0.00279266	0.00338973	0.00344114
CHIR4	8.66667	85	0.00301733	0.002994	0.00274193	0.00270723	0.00329273	0.00328077
CHIR4	8.75	89	0.00308095	0.00296931	0.00282611	0.00268845	0.00333578	0.00325017
CHIR4	8.83333	90	0.00308327	0.00312284	0.00277272	0.00281883	0.00339382	0.00342684
CHIR4	8.91667	85	0.00316597	0.00289279	0.002906	0.00262602	0.00342594	0.00315956
CHIR4	9	89	0.00316813	0.00279188	0.00292396	0.00253444	0.0034123	0.00304933
CHIR4	9.08333	83	0.00301553	0.00281432	0.00275598	0.0025336	0.00327507	0.00309505
CHIR4	9.16667	88	0.00315313	0.00281547	0.00291487	0.00255859	0.0033914	0.00307235
CHIR4	9.25	87	0.003154	0.00281116	0.00289313	0.00255123	0.00341487	0.00307108
CHIR4	9.33333	91	0.00299669	0.00280637	0.00276523	0.00255777	0.00322816	0.00305497
CHIR4	9.41667	89	0.00309335	0.00274646	0.00285755	0.0024826	0.00332915	0.00301032
CHIR4	9.5	91	0.00310542	0.00283115	0.0028455	0.0025687	0.00336534	0.00309361
CHIR4	9.58333	83	0.00301499	0.00282151	0.00274912	0.00254406	0.00328086	0.00309896
CHIR4	9.66667	87	0.00309257	0.00288032	0.00282098	0.00260636	0.00336416	0.00315428
CHIR4	9.75	88	0.00284745	0.00272307	0.002639	0.0024701	0.0030559	0.00297604
CHIR4	9.83333	90	0.00305572	0.00265453	0.00281879	0.00239758	0.00329265	0.00291148
CHIR4	9.91667	89	0.00288458	0.0026327	0.00267111	0.00238929	0.00309804	0.0028761
CHIR4	10	91	0.0030624	0.00272155	0.00281839	0.00245108	0.00330641	0.00299202
CHIR4	10.0833	91	0.00314573	0.00279724	0.0028323	0.00252269	0.00345917	0.00307179
CHIR4	10.1667	95	0.00305108	0.00275585	0.0027913	0.00249101	0.00331086	0.00302068
CHIR4	10.25	93	0.00292209	0.00281176	0.00263872	0.00254312	0.00320546	0.00308039
CHIR4	10.3333	96	0.00308524	0.00283056	0.00280157	0.00256191	0.00336892	0.0030992
CHIR4	10.4167	97	0.00302001	0.00277946	0.0027652	0.00250212	0.00327483	0.00305681
CHIR4	10.5	96	0.00302484	0.00262622	0.00278715	0.00238287	0.00326254	0.00286957
CHIR4	10.5833	95	0.00298645	0.00282783	0.00274004	0.00254052	0.00323286	0.00311513
CHIR4	10.6667	100	0.00301961	0.00276038	0.00278973	0.00251	0.0032495	0.00301076
CHIR4	10.75	99	0.00290036	0.00278504	0.00266308	0.00252659	0.00313765	0.00304349
CHIR4	10.8333	101	0.0030488	0.00280669	0.00282174	0.0025577	0.00327585	0.00305568
CHIR4	10.9167	102	0.00295919	0.0027625	0.0027348	0.00251824	0.00318359	0.00300676
CHIR4	11	96	0.00274174	0.00277062	0.0025277	0.00252628	0.00295578	0.00301497
CHIR4	11.0833	101	0.00293928	0.00269949	0.00270687	0.00247626	0.00317169	0.00292272
CHIR4	11.1667	101	0.00289898	0.00270828	0.00268473	0.00248251	0.00311323	0.00293405
CHIR4	11.25	107	0.00290418	0.00276016	0.0026736	0.00253779	0.00313477	0.00298253
CHIR4	11.3333	99	0.00292084	0.00272401	0.00268652	0.0024799	0.00315517	0.00296813
CHIR4	11.4167	98	0.00303119	0.00277143	0.00278711	0.00251592	0.00327527	0.00302693
CHIR4	11.5	97	0.00301071	0.00273357	0.00277098	0.00248409	0.00325045	0.00298306
CHIR4	11.5833	99	0.00283322	0.00267118	0.00259118	0.00243879	0.00307526	0.00290357
CHIR4	11.6667	101	0.00299551	0.00277183	0.00276757	0.00248677	0.00322345	0.0030569
CHIR4	11.75	98	0.00284109	0.00277831	0.00261032	0.00250126	0.00307186	0.00305536
CHIR4	11.8333	98	0.00291268	0.00269009	0.00268148	0.00241736	0.00314387	0.00296283
CHIR4	11.9167	99	0.00292326	0.00270256	0.00268523	0.00245214	0.0031613	0.00295298
CHIR4	12	100	0.00299643	0.00271855	0.00276499	0.00246223	0.00322787	0.00297486
CHIR8	-0.583333	91	0.00274953	0.00150824	0.00246841	0.00114088	0.00303064	0.0018756
CHIR8	-0.5	92	0.00266921	0.00152947	0.00238209	0.00117025	0.00295633	0.00188869
CHIR8	-0.416667	88	0.00244153	0.00149633	0.00226713	0.00112347	0.00261593	0.0018692
CHIR8	-0.333333	90	0.00253299	0.00144545	0.0023329	0.00109248	0.00273308	0.00179841
CHIR8	-0.25	93	0.00254916	0.00142346	0.00234363	0.00108621	0.00275469	0.0017607
CHIR8	-0.166667	90	0.00263108	0.00138986	0.00215964	0.00106452	0.00310252	0.0017152
CHIR8	-0.0833333	92	0.00236715	0.00144518	0.00221086	0.00110966	0.00252344	0.00178071
CHIR8	0	94	0.0024852	0.00139224	0.00232251	0.00125674	0.00264789	0.00152774
CHIR8	0.0833333	92	0.00255175	0.00139365	0.00239158	0.00126595	0.00271193	0.00152134
CHIR8	0.166667	94	0.00263573	0.00141656	0.00246736	0.00127087	0.0028041	0.00156226
CHIR8	0.25	89	0.00282249	0.00147736	0.00258183	0.00135517	0.00306315	0.00159955
CHIR8	0.333333	94	0.00277085	0.00159396	0.0025759	0.00146579	0.0029658	0.00172214
CHIR8	0.416667	93	0.00278793	0.00165974	0.00258915	0.00152355	0.0029867	0.00179593
CHIR8	0.5	95	0.00270557	0.00168751	0.00251743	0.00155694	0.00289372	0.00181808
CHIR8	0.583333	96	0.00272718	0.00176172	0.00252928	0.00164237	0.00292507	0.00188107
CHIR8	0.666667	97	0.0030635	0.00184714	0.00271157	0.00172542	0.00341543	0.00196885
CHIR8	0.75	97	0.00291302	0.00191273	0.00266996	0.00176765	0.00315609	0.00205781
CHIR8	0.833333	98	0.00299784	0.00197426	0.00276188	0.00184399	0.0032338	0.00210453
CHIR8	0.916667	99	0.00286658	0.00200654	0.00271093	0.00190545	0.00302223	0.00210764
CHIR8	1	95	0.00289284	0.00203004	0.0027459	0.00192687	0.00303977	0.0021332
CHIR8	1.08333	94	0.00303981	0.00213303	0.00287842	0.00202707	0.0032012	0.002239
CHIR8	1.16667	101	0.00310839	0.00228407	0.00292833	0.00215041	0.00328845	0.00241774
CHIR8	1.25	103	0.00316299	0.00238657	0.00294134	0.0022241	0.00338464	0.00254904
CHIR8	1.33333	100	0.00324358	0.00243908	0.00305353	0.00229694	0.00343363	0.00258122
CHIR8	1.41667	100	0.00327485	0.0025369	0.00311649	0.00239728	0.00343322	0.00267653
CHIR8	1.5	102	0.00327514	0.00264731	0.00308084	0.00249417	0.00346945	0.00280045
CHIR8	1.58333	100	0.00333581	0.00266633	0.00315289	0.00253528	0.00351874	0.00279737
CHIR8	1.66667	105	0.00345087	0.00277229	0.00328046	0.002642	0.00362127	0.00290259
CHIR8	1.75	98	0.00345855	0.00288091	0.00329878	0.00272148	0.00361833	0.00304035
CHIR8	1.83333	95	0.00352154	0.00297426	0.00332742	0.00282866	0.00371565	0.00311985
CHIR8	1.91667	96	0.00361	0.00304547	0.00335991	0.00286902	0.00386009	0.00322192
CHIR8	2	94	0.00353032	0.00303856	0.00333553	0.00288164	0.00372512	0.00319548
CHIR8	2.08333	95	0.00356729	0.00310393	0.0033798	0.00295876	0.00375477	0.0032491
CHIR8	2.16667	96	0.00350315	0.00316243	0.00333731	0.00301237	0.00366898	0.00331248
CHIR8	2.25	95	0.00359038	0.00316974	0.00340717	0.00302053	0.00377359	0.00331895
CHIR8	2.33333	96	0.00360477	0.00322629	0.00342813	0.00310001	0.00378141	0.00335256
CHIR8	2.41667	97	0.00367919	0.00332294	0.0035079	0.00316359	0.00385047	0.0034823
CHIR8	2.5	97	0.00372934	0.00338835	0.00355054	0.00325492	0.00390814	0.00352178
CHIR8	2.58333	92	0.00371713	0.00343003	0.00352999	0.00327265	0.00390428	0.00358741
CHIR8	2.66667	94	0.00376342	0.00347718	0.00358794	0.00331739	0.0039389	0.00363697
CHIR8	2.75	95	0.00376211	0.00353897	0.00360936	0.00337712	0.00391487	0.00370081
CHIR8	2.83333	96	0.00379124	0.00362814	0.00361942	0.00345558	0.00396306	0.00380069
CHIR8	2.91667	93	0.00392298	0.00368119	0.00375147	0.00350622	0.0040945	0.00385616
CHIR8	3	95	0.00401293	0.00364279	0.00383607	0.00349771	0.0041898	0.00378786
CHIR8	3.08333	93	0.00393736	0.00373348	0.00375101	0.00357135	0.0041237	0.00389562
CHIR8	3.16667	93	0.00404642	0.00383077	0.00385422	0.00367394	0.00423862	0.00398759
CHIR8	3.25	100	0.00409374	0.00388606	0.0038131	0.00370012	0.00437438	0.00407199
CHIR8	3.33333	100	0.00422496	0.00395289	0.00399729	0.00374205	0.00445263	0.00416374
CHIR8	3.41667	99	0.00403095	0.0040051	0.00383284	0.00381776	0.00422906	0.00419244
CHIR8	3.5	100	0.004139	0.00406283	0.00395955	0.00385109	0.00431844	0.00427457
CHIR8	3.58333	100	0.00423565	0.00405753	0.00399626	0.00387624	0.00447503	0.00423883
CHIR8	3.66667	99	0.00422329	0.00409252	0.00395626	0.0039182	0.00449033	0.00426684
CHIR8	3.75	93	0.00436007	0.00423831	0.0040976	0.00405261	0.00462253	0.00442402
CHIR8	3.83333	94	0.00440628	0.00428166	0.00419031	0.00410437	0.00462226	0.00445894
CHIR8	3.91667	87	0.00437972	0.0042651	0.00413708	0.00407481	0.00462236	0.00445538
CHIR8	4	97	0.00443515	0.00432656	0.00419894	0.00413117	0.00467136	0.00452194
CHIR8	4.08333	95	0.00440292	0.00432082	0.00418999	0.00412889	0.00461584	0.00451276
CHIR8	4.16667	98	0.00449116	0.0044884	0.00426694	0.00429428	0.00471538	0.00468252
CHIR8	4.25	100	0.00454817	0.00450297	0.00433279	0.00432352	0.00476355	0.00468241
CHIR8	4.33333	98	0.00456852	0.0045222	0.00427952	0.00432626	0.00485752	0.00471813
CHIR8	4.41667	96	0.00469787	0.00457302	0.00441742	0.0043572	0.00497832	0.00478884
CHIR8	4.5	100	0.00463639	0.00456977	0.00436699	0.00437713	0.00490579	0.00476241
CHIR8	4.58333	97	0.00460622	0.00470425	0.00435855	0.00449215	0.0048539	0.00491634
CHIR8	4.66667	94	0.00466	0.0046291	0.00440198	0.0044145	0.00491802	0.00484371
CHIR8	4.75	99	0.00474979	0.0047929	0.0044948	0.00457413	0.00500478	0.00501168
CHIR8	4.83333	96	0.00476022	0.00471498	0.0044449	0.00451306	0.00507555	0.00491689
CHIR8	4.91667	98	0.00469923	0.00482299	0.00437803	0.00459698	0.00502043	0.005049
CHIR8	5	100	0.0049359	0.00492119	0.00462703	0.00468762	0.00524478	0.00515477
CHIR8	5.08333	100	0.00481377	0.0049295	0.00454602	0.00469574	0.00508151	0.00516326
CHIR8	5.16667	97	0.00483086	0.00497143	0.00452151	0.00471189	0.0051402	0.00523098
CHIR8	5.25	97	0.0048096	0.00501187	0.00455357	0.00476133	0.00506564	0.0052624
CHIR8	5.33333	100	0.0049571	0.00498663	0.00471153	0.00476745	0.00520267	0.00520581
CHIR8	5.41667	96	0.00483263	0.00497141	0.00458939	0.00475342	0.00507586	0.0051894
CHIR8	5.5	105	0.00501195	0.00512483	0.00473033	0.00487238	0.00529357	0.00537727
CHIR8	5.58333	96	0.00509522	0.00514475	0.00478557	0.00490468	0.00540488	0.00538481
CHIR8	5.66667	106	0.00501332	0.00509877	0.00473074	0.00485327	0.00529589	0.00534426
CHIR8	5.75	104	0.00503386	0.00513954	0.00474145	0.0048866	0.00532627	0.00539247
CHIR8	5.83333	105	0.00502502	0.00514467	0.00471629	0.00489883	0.00533375	0.0053905
CHIR8	5.91667	92	0.0050366	0.00511286	0.0047557	0.00487192	0.0053175	0.0053538
CHIR8	6	97	0.00501196	0.00513911	0.00471516	0.00489896	0.00530876	0.00537925
CHIR8	6.08333	100	0.00512962	0.00511689	0.00486352	0.00486305	0.00539572	0.00537072
CHIR8	6.16667	101	0.00511988	0.00520739	0.0048433	0.00494848	0.00539646	0.0054663
CHIR8	6.25	97	0.00510076	0.00519413	0.00483374	0.00492064	0.00536779	0.00546762
CHIR8	6.33333	104	0.00495546	0.00517198	0.00469664	0.00492089	0.00521428	0.00542308
CHIR8	6.41667	101	0.00501694	0.00526416	0.00474397	0.00499207	0.00528991	0.00553625
CHIR8	6.5	99	0.00525166	0.00526827	0.0050059	0.00500957	0.00549742	0.00552696
CHIR8	6.58333	102	0.00525619	0.00531145	0.00502458	0.00507002	0.00548779	0.00555288
CHIR8	6.66667	105	0.00544641	0.00539337	0.00518179	0.00513575	0.00571103	0.00565099
CHIR8	6.75	103	0.00531591	0.00529246	0.00504249	0.0050402	0.00558934	0.00554472
CHIR8	6.83333	106	0.0054339	0.00534001	0.0051845	0.00509175	0.00568329	0.00558826
CHIR8	6.91667	102	0.00528509	0.00530966	0.00501882	0.00506417	0.00555136	0.00555515
CHIR8	7	104	0.00525741	0.00539804	0.00499402	0.00512346	0.00552079	0.00567263
CHIR8	7.08333	100	0.00531915	0.00540573	0.00506845	0.00514829	0.00556985	0.00566316
CHIR8	7.16667	99	0.00535805	0.00529894	0.00508007	0.00502852	0.00563603	0.00556936
CHIR8	7.25	99	0.00525665	0.00532749	0.00502014	0.00506978	0.00549317	0.0055852
CHIR8	7.33333	102	0.00534669	0.00540001	0.00506726	0.00513891	0.00562613	0.00566111
CHIR8	7.41667	99	0.00533631	0.00541675	0.00511026	0.00514867	0.00556236	0.00568484
CHIR8	7.5	98	0.00517935	0.00534301	0.00491764	0.0050679	0.00544105	0.00561812
CHIR8	7.58333	100	0.00510852	0.00538089	0.0048379	0.00510652	0.00537913	0.00565526
CHIR8	7.66667	97	0.0052418	0.00537166	0.00498507	0.00508956	0.00549854	0.00565376
CHIR8	7.75	104	0.00532779	0.00543693	0.00505656	0.00515425	0.00559902	0.00571962
CHIR8	7.83333	103	0.00541658	0.00544735	0.00514664	0.00517579	0.00568652	0.00571891
CHIR8	7.91667	106	0.00536894	0.0054888	0.00510111	0.00520825	0.00563678	0.00576936
CHIR8	8	104	0.00530095	0.00550247	0.00499445	0.00521212	0.00560745	0.00579283
CHIR8	8.08333	106	0.00536072	0.00567906	0.00501876	0.00532636	0.00570268	0.00603176
CHIR8	8.16667	98	0.00527862	0.00548032	0.00496462	0.00517984	0.00559262	0.00578079
CHIR8	8.25	102	0.00541554	0.0056046	0.0051382	0.00529613	0.00569288	0.00591307
CHIR8	8.33333	104	0.00539381	0.0056138	0.00509968	0.00530602	0.00568794	0.00592157
CHIR8	8.41667	104	0.00545701	0.00567014	0.00514665	0.00534455	0.00576737	0.00599573
CHIR8	8.5	100	0.00548324	0.00568697	0.005204	0.0053691	0.00576249	0.00600484
CHIR8	8.58333	107	0.00517751	0.00556208	0.00483604	0.00523982	0.00551899	0.00588435
CHIR8	8.66667	106	0.00545826	0.00560263	0.00514693	0.00528503	0.00576958	0.00592024
CHIR8	8.75	107	0.00533315	0.00580444	0.00502049	0.00548754	0.00564581	0.00612134
CHIR8	8.83333	108	0.00536428	0.00563178	0.00505928	0.00531194	0.00566927	0.00595162
CHIR8	8.91667	109	0.0054083	0.00561745	0.00510017	0.00528924	0.00571642	0.00594566
CHIR8	9	108	0.00536802	0.00562222	0.00504439	0.00528324	0.00569164	0.0059612
CHIR8	9.08333	106	0.00529118	0.00555212	0.00494544	0.00521206	0.00563693	0.00589218
CHIR8	9.16667	109	0.00537281	0.00557087	0.00503124	0.00522256	0.00571438	0.00591918
CHIR8	9.25	111	0.00556205	0.00565437	0.00524476	0.00530791	0.00587935	0.00600083
CHIR8	9.33333	108	0.00549235	0.0057019	0.00517827	0.00533808	0.00580642	0.00606571
CHIR8	9.41667	107	0.00539573	0.00574972	0.00505273	0.00538299	0.00573873	0.00611645
CHIR8	9.5	107	0.00553017	0.00572267	0.00518417	0.00534608	0.00587617	0.00609926
CHIR8	9.58333	108	0.00530855	0.00571742	0.00496733	0.0053486	0.00564977	0.00608624
CHIR8	9.66667	103	0.00541022	0.00571162	0.00506007	0.00532309	0.00576038	0.00610015
CHIR8	9.75	105	0.00570554	0.00575243	0.00534022	0.00537022	0.00607086	0.00613464
CHIR8	9.83333	108	0.00553101	0.00570854	0.00520025	0.00533155	0.00586177	0.00608554
CHIR8	9.91667	103	0.00569462	0.00575722	0.00529685	0.00536762	0.0060924	0.00614682
CHIR8	10	106	0.00573543	0.00578674	0.00528439	0.00542078	0.00618647	0.0061527
CHIR8	10.0833	108	0.00556969	0.00562378	0.00526776	0.0052698	0.00587162	0.00597775
CHIR8	10.1667	108	0.00554483	0.00573796	0.00521648	0.00536988	0.00587318	0.00610604
CHIR8	10.25	110	0.00557978	0.00571877	0.00527985	0.00534284	0.00587971	0.00609471
CHIR8	10.3333	103	0.00549799	0.00573429	0.00517982	0.00534525	0.00581616	0.00612332
CHIR8	10.4167	108	0.00549973	0.00573666	0.00516565	0.00536019	0.00583382	0.00611312
CHIR8	10.5	111	0.00568394	0.00572323	0.00534535	0.00534833	0.00602254	0.00609814
CHIR8	10.5833	110	0.00570806	0.00567192	0.00540188	0.00529288	0.00601424	0.00605095
CHIR8	10.6667	115	0.0054351	0.00568962	0.00511012	0.00529572	0.00576009	0.00608352
CHIR8	10.75	116	0.00546911	0.0056971	0.00514111	0.00532601	0.00579711	0.00606819
CHIR8	10.8333	117	0.00565678	0.00576203	0.00530389	0.0053881	0.00600967	0.00613596
CHIR8	10.9167	118	0.0055298	0.00561695	0.0051892	0.00524594	0.00587041	0.00598797
CHIR8	11	116	0.00537095	0.00561432	0.00501971	0.00523237	0.00572219	0.00599627
CHIR8	11.0833	111	0.00554503	0.0056588	0.00519682	0.00522736	0.00589323	0.00609025
CHIR8	11.1667	116	0.00554522	0.00556189	0.00519734	0.00514829	0.00589309	0.00597548
CHIR8	11.25	107	0.00536921	0.00562421	0.00500202	0.00521173	0.0057364	0.00603669
CHIR8	11.3333	110	0.00532067	0.00562281	0.00493113	0.00518846	0.00571021	0.00605716
CHIR8	11.4167	108	0.00532801	0.00554394	0.0049887	0.00512235	0.00566732	0.00596552
CHIR8	11.5	111	0.00543357	0.00562024	0.00508001	0.00520477	0.00578713	0.00603571
CHIR8	11.5833	107	0.00555472	0.00570579	0.00519701	0.00525714	0.00591243	0.00615445
CHIR8	11.6667	109	0.00551395	0.00569686	0.00514411	0.00524814	0.00588378	0.00614558
CHIR8	11.75	109	0.00548071	0.00576242	0.00512097	0.00532527	0.00584045	0.00619956
CHIR8	11.8333	112	0.00539156	0.00563331	0.00500561	0.00519504	0.00577752	0.00607157
CHIR8	11.9167	117	0.00529074	0.00558784	0.00492411	0.00515944	0.00565736	0.00601625
CHIR8	12	106	0.00538696	0.00573751	0.00499199	0.00528256	0.00578194	0.00619245

## Sheet: Figure 3 supplement 1
Treatment	clone	time (hour)	number of cells (for this timepoint and treatment)	normalized cytoplasmic intensity (mean)	normalized nuclear intensity (mean)	normalized cytoplasmic intensity (lower boundry 95%CI)	normalized nuclear intensity (lower boundry 95%CI)	normalized cytoplasmic intensity (upper boundry 95%CI)	normalized nuclear intensity (upper boundry 95%CI)
BSA	clone 1	-0.583333	74	0.993824	0.903473	0.908997	0.790152	1.07865	1.01679
BSA	clone 1	-0.5	60	1.00501	0.974832	0.910183	0.821919	1.09984	1.12775
BSA	clone 1	-0.416667	80	0.882823	1.00699	0.800353	0.883785	0.965293	1.1302
BSA	clone 1	-0.333333	62	1.03669	1.07111	0.955596	0.929095	1.11779	1.21313
BSA	clone 1	-0.25	72	1.09325	0.953679	1.01026	0.846014	1.17624	1.06134
BSA	clone 1	-0.166667	61	1.04351	1.04705	0.969892	0.923025	1.11713	1.17107
BSA	clone 1	-0.0833333	70	0.969821	1.05929	0.908891	0.926708	1.03075	1.19186
BSA	clone 1	0	61	0.982883	1.05472	0.903422	0.896083	1.06234	1.21335
BSA	clone 1	0.0833333	73	0.961651	1.05558	0.867969	0.904767	1.05533	1.2064
BSA	clone 1	0.166667	13	1.0398	1.2036	0.753602	0.891393	1.326	1.51581
BSA	clone 1	0.25	65	1.05378	1.14923	0.98995	1.0167	1.11762	1.28175
BSA	clone 1	0.333333	61	1.076	1.01578	0.993108	0.914501	1.15889	1.11705
BSA	clone 1	0.416667	71	1.05975	1.02462	0.980488	0.932395	1.13902	1.11685
BSA	clone 1	0.5	61	1.04398	0.999899	0.977717	0.902342	1.11025	1.09746
BSA	clone 1	0.583333	70	1.04683	1.08374	0.945795	0.9855	1.14786	1.18198
BSA	clone 1	0.666667	55	1.13721	1.00764	1.03932	0.910513	1.23509	1.10477
BSA	clone 1	0.75	68	1.01078	1.10935	0.901211	1.01281	1.12035	1.20589
BSA	clone 1	0.833333	61	1.04619	1.13917	0.946423	1.01744	1.14597	1.26089
BSA	clone 1	0.916667	65	1.01089	1.05735	0.920615	0.952905	1.10117	1.1618
BSA	clone 1	1	61	1.07711	1.05252	0.988563	0.945628	1.16565	1.15941
BSA	clone 1	1.08333	77	1.02006	1.0554	0.921029	0.950725	1.11908	1.16007
BSA	clone 1	1.16667	73	1.18435	1.06151	1.0885	0.940971	1.28019	1.18206
BSA	clone 1	1.25	70	1.07535	1.02475	0.979989	0.911635	1.17071	1.13786
BSA	clone 1	1.33333	74	1.17048	1.05369	1.08311	0.919195	1.25784	1.18819
BSA	clone 1	1.41667	75	1.0152	1.07901	0.913197	0.946538	1.11721	1.21148
BSA	clone 1	1.5	73	0.979578	1.10287	0.902817	0.956402	1.05634	1.24934
BSA	clone 1	1.58333	77	1.03418	1.01067	0.947699	0.879847	1.12067	1.14149
BSA	clone 1	1.66667	80	1.05529	1.04165	0.978042	0.921635	1.13254	1.16167
BSA	clone 1	1.75	80	0.993218	1.09754	0.923006	0.964228	1.06343	1.23085
BSA	clone 1	1.83333	80	0.98342	1.02422	0.907602	0.90258	1.05924	1.14586
BSA	clone 1	1.91667	76	1.00606	1.01395	0.939362	0.89438	1.07276	1.13352
BSA	clone 1	2	79	1.03739	1.00343	0.969348	0.890016	1.10543	1.11684
BSA	clone 1	2.08333	79	0.943767	1.01908	0.861966	0.869452	1.02557	1.1687
BSA	clone 1	2.16667	79	1.01062	1.03199	0.934054	0.899145	1.08719	1.16483
BSA	clone 1	2.25	76	0.97339	1.03748	0.888334	0.902895	1.05845	1.17207
BSA	clone 1	2.33333	82	1.05156	1.0184	0.980762	0.915077	1.12235	1.12172
BSA	clone 1	2.41667	77	1.04085	1.0189	0.95523	0.896355	1.12646	1.14145
BSA	clone 1	2.5	80	1.1009	1.035	1.0269	0.923872	1.17489	1.14614
BSA	clone 1	2.58333	82	1.04785	1.01793	0.956357	0.898676	1.13934	1.13719
BSA	clone 1	2.66667	87	1.05021	0.997367	0.973491	0.891815	1.12693	1.10292
BSA	clone 1	2.75	82	0.95684	1.00976	0.879957	0.891144	1.03372	1.12838
BSA	clone 1	2.83333	83	1.02381	1.0234	0.942783	0.917622	1.10485	1.12917
BSA	clone 1	2.91667	80	1.07315	0.99675	0.978583	0.907267	1.16771	1.08623
BSA	clone 1	3	85	0.978839	1.01396	0.900494	0.912915	1.05718	1.11501
BSA	clone 1	3.08333	86	1.13672	1.05248	1.04591	0.940651	1.22754	1.16431
BSA	clone 1	3.16667	84	1.09159	1.04094	1.0167	0.935386	1.16648	1.14649
BSA	clone 1	3.25	82	0.996922	1.02562	0.919638	0.922207	1.07421	1.12903
BSA	clone 1	3.33333	79	1.02154	1.04073	0.950962	0.932252	1.09211	1.14921
BSA	clone 1	3.41667	76	1.04873	1.02307	0.965369	0.914768	1.1321	1.13137
BSA	clone 1	3.5	79	0.991418	0.979325	0.91858	0.877175	1.06426	1.08148
BSA	clone 1	3.58333	78	0.943132	0.977557	0.87247	0.864741	1.01379	1.09037
BSA	clone 1	3.66667	81	1.01821	1.00202	0.942171	0.883115	1.09425	1.12093
BSA	clone 1	3.75	85	1.01902	1.01302	0.958744	0.896799	1.07929	1.12924
BSA	clone 1	3.83333	81	0.995828	1.04826	0.923322	0.919456	1.06833	1.17706
BSA	clone 1	3.91667	80	1.04127	1.01208	0.96733	0.899376	1.11521	1.12479
BSA	clone 1	4	80	0.975338	0.978187	0.899889	0.882514	1.05079	1.07386
BSA	clone 1	4.08333	79	0.982676	0.980982	0.898907	0.877529	1.06645	1.08444
BSA	clone 1	4.16667	79	0.980111	0.929138	0.899652	0.83251	1.06057	1.02577
BSA	clone 1	4.25	86	1.05148	1.01262	0.974859	0.90696	1.1281	1.11827
BSA	clone 1	4.33333	77	0.93488	1.00079	0.856647	0.889418	1.01311	1.11216
BSA	clone 1	4.41667	81	1.0393	0.995241	0.961045	0.892802	1.11755	1.09768
BSA	clone 1	4.5	85	0.965531	1.01676	0.884155	0.910269	1.04691	1.12324
BSA	clone 1	4.58333	84	1.01698	1.00658	0.945114	0.904337	1.08885	1.10882
BSA	clone 1	4.66667	81	1.02039	1.0382	0.944491	0.924071	1.09628	1.15234
BSA	clone 1	4.75	82	1.00192	0.938153	0.926822	0.830031	1.07702	1.04627
BSA	clone 1	4.83333	82	1.01276	0.979261	0.942873	0.834159	1.08264	1.12436
BSA	clone 1	4.91667	83	1.049	0.984805	0.977603	0.855761	1.12041	1.11385
BSA	clone 1	5	78	1.02646	0.950409	0.950651	0.815849	1.10228	1.08497
BSA	clone 1	5.08333	81	1.03656	0.934686	0.95405	0.819405	1.11906	1.04997
BSA	clone 1	5.16667	80	0.946754	0.955635	0.87969	0.842557	1.01382	1.06871
BSA	clone 1	5.25	77	1.00855	0.949406	0.933619	0.828454	1.08348	1.07036
BSA	clone 1	5.33333	81	1.05601	0.895592	0.97795	0.787651	1.13406	1.00353
BSA	clone 1	5.41667	82	0.95553	0.914932	0.884392	0.811237	1.02667	1.01863
BSA	clone 1	5.5	82	0.980764	0.896598	0.904958	0.791246	1.05657	1.00195
BSA	clone 1	5.58333	87	0.980492	0.899025	0.917316	0.80604	1.04367	0.99201
BSA	clone 1	5.66667	80	0.961777	0.891437	0.890614	0.790846	1.03294	0.992028
BSA	clone 1	5.75	83	1.01308	0.895343	0.947111	0.8119	1.07905	0.978786
BSA	clone 1	5.83333	85	0.979793	0.913257	0.917506	0.810475	1.04208	1.01604
BSA	clone 1	5.91667	88	0.98121	0.947228	0.909417	0.82444	1.053	1.07002
BSA	clone 1	6	94	0.94394	0.952973	0.877677	0.841274	1.0102	1.06467
BSA	clone 1	6.08333	91	0.960282	0.892403	0.89361	0.803854	1.02695	0.980952
BSA	clone 1	6.16667	94	1.03465	0.970162	0.970564	0.862355	1.09874	1.07797
BSA	clone 1	6.25	94	1.01009	0.973721	0.933978	0.870182	1.0862	1.07726
BSA	clone 1	6.33333	93	1.00668	0.957418	0.940358	0.861962	1.07301	1.05287
BSA	clone 1	6.41667	91	1.01465	0.936967	0.931288	0.851092	1.098	1.02284
BSA	clone 1	6.5	81	0.998415	0.936662	0.908394	0.832697	1.08844	1.04063
BSA	clone 1	6.58333	92	1.02879	0.90333	0.95526	0.819223	1.10233	0.987436
BSA	clone 1	6.66667	87	1.01679	0.923599	0.93613	0.83571	1.09745	1.01149
BSA	clone 1	6.75	88	0.97888	0.876536	0.906449	0.785824	1.05131	0.967248
BSA	clone 1	6.83333	86	0.997783	0.894879	0.924467	0.802233	1.0711	0.987525
BSA	clone 1	6.91667	95	0.992296	0.925914	0.920886	0.837084	1.06371	1.01475
BSA	clone 1	7	87	0.940816	0.916917	0.855112	0.815939	1.02652	1.0179
BSA	clone 1	7.08333	87	1.0532	0.968796	0.950358	0.874123	1.15605	1.06347
BSA	clone 1	7.16667	90	0.934466	0.98093	0.848202	0.884697	1.02073	1.07716
BSA	clone 1	7.25	87	0.96467	0.911292	0.89411	0.820823	1.03523	1.00176
BSA	clone 1	7.33333	86	0.990584	0.952555	0.903733	0.85902	1.07744	1.04609
BSA	clone 1	7.41667	88	1.0439	0.973165	0.963281	0.868499	1.12452	1.07783
BSA	clone 1	7.5	85	0.95868	0.949049	0.879776	0.850616	1.03758	1.04748
BSA	clone 1	7.58333	90	0.939551	0.96888	0.867147	0.86299	1.01195	1.07477
BSA	clone 1	7.66667	93	0.920212	0.975705	0.853371	0.863894	0.987052	1.08752
BSA	clone 1	7.75	93	0.946307	0.97436	0.881535	0.848177	1.01108	1.10054
BSA	clone 1	7.83333	95	0.88977	0.924631	0.820692	0.836761	0.958848	1.0125
BSA	clone 1	7.91667	89	0.92964	0.955105	0.857649	0.862234	1.00163	1.04798
BSA	clone 1	8	90	1.03584	0.950369	0.95632	0.848063	1.11535	1.05267
BSA	clone 1	8.08333	95	0.942811	0.927336	0.871397	0.834119	1.01423	1.02055
BSA	clone 1	8.16667	90	0.848993	0.947346	0.787848	0.845685	0.910138	1.04901
BSA	clone 1	8.25	95	0.986095	0.972826	0.920121	0.872774	1.05207	1.07288
BSA	clone 1	8.33333	95	0.971857	0.960714	0.906472	0.868055	1.03724	1.05337
BSA	clone 1	8.41667	95	0.956424	0.973622	0.890085	0.869972	1.02276	1.07727
BSA	clone 1	8.5	97	0.977096	0.920032	0.902544	0.819286	1.05165	1.02078
BSA	clone 1	8.58333	88	0.991713	0.921269	0.916077	0.820672	1.06735	1.02186
BSA	clone 1	8.66667	94	0.919323	0.957735	0.849677	0.848926	0.988969	1.06654
BSA	clone 1	8.75	88	0.983952	0.989839	0.908157	0.879503	1.05975	1.10017
BSA	clone 1	8.83333	87	0.962488	0.959345	0.895358	0.861663	1.02962	1.05703
BSA	clone 1	8.91667	84	0.956767	0.908869	0.885793	0.819618	1.02774	0.998121
BSA	clone 1	9	83	0.957642	0.942069	0.898332	0.835864	1.01695	1.04827
BSA	clone 1	9.08333	90	0.956459	0.967481	0.883987	0.862367	1.02893	1.0726
BSA	clone 1	9.16667	90	0.881244	0.965876	0.817426	0.850951	0.945061	1.0808
BSA	clone 1	9.25	89	0.997283	0.964633	0.927207	0.861492	1.06736	1.06777
BSA	clone 1	9.33333	89	0.986374	0.951103	0.909038	0.859134	1.06371	1.04307
BSA	clone 1	9.41667	87	1.00657	0.9736	0.935742	0.885318	1.0774	1.06188
BSA	clone 1	9.5	93	0.852362	0.989465	0.782055	0.894807	0.922669	1.08412
BSA	clone 1	9.58333	85	0.935057	1.03957	0.854795	0.930198	1.01532	1.14894
BSA	clone 1	9.66667	89	0.948773	0.947862	0.87768	0.852761	1.01987	1.04296
BSA	clone 1	9.75	94	0.864358	0.952018	0.795085	0.860511	0.93363	1.04353
BSA	clone 1	9.83333	93	0.946748	0.939962	0.879694	0.835276	1.0138	1.04465
BSA	clone 1	9.91667	95	0.950043	0.918839	0.880223	0.822066	1.01986	1.01561
BSA	clone 1	10	91	0.883764	0.921912	0.806294	0.816818	0.961234	1.02701
BSA	clone 1	10.0833	98	0.893761	0.942735	0.831675	0.841519	0.955846	1.04395
BSA	clone 1	10.1667	99	0.943111	0.95454	0.880739	0.856025	1.00548	1.05306
BSA	clone 1	10.25	103	0.933837	0.955698	0.869446	0.85663	0.998228	1.05477
BSA	clone 1	10.3333	95	0.914706	1.00397	0.845071	0.875593	0.98434	1.13235
BSA	clone 1	10.4167	94	0.939083	1.00727	0.876194	0.889229	1.00197	1.12531
BSA	clone 1	10.5	98	0.952419	0.964641	0.888384	0.86258	1.01645	1.0667
BSA	clone 1	10.5833	102	0.912593	0.989487	0.848009	0.888543	0.977177	1.09043
BSA	clone 1	10.6667	104	0.981392	1.03141	0.921298	0.922739	1.04148	1.14008
BSA	clone 1	10.75	98	0.916146	1.01448	0.855744	0.916056	0.976548	1.11291
BSA	clone 1	10.8333	95	0.984695	1.01867	0.918958	0.912779	1.05043	1.12456
BSA	clone 1	10.9167	99	0.918871	0.946324	0.86237	0.860048	0.975373	1.0326
BSA	clone 1	11	97	0.859175	0.956561	0.800496	0.866578	0.917854	1.04654
BSA	clone 1	11.0833	97	0.912891	0.947679	0.849002	0.857846	0.97678	1.03751
BSA	clone 1	11.1667	107	0.916029	0.896719	0.853663	0.812373	0.978395	0.981065
BSA	clone 1	11.25	103	0.935293	0.865655	0.879087	0.776499	0.9915	0.954811
BSA	clone 1	11.3333	106	0.902852	0.911371	0.840187	0.821154	0.965516	1.00159
BSA	clone 1	11.4167	100	0.858653	0.86017	0.806873	0.773865	0.910432	0.946476
BSA	clone 1	11.5	99	0.899748	0.909979	0.832584	0.821246	0.966912	0.998712
BSA	clone 1	11.5833	95	0.923263	0.940479	0.860496	0.846752	0.986031	1.03421
BSA	clone 1	11.6667	98	0.9523	0.883295	0.892132	0.795734	1.01247	0.970856
BSA	clone 1	11.75	94	0.919938	0.839071	0.850129	0.754494	0.989747	0.923647
BSA	clone 1	11.8333	100	0.881262	0.873508	0.812687	0.785351	0.949837	0.961665
BSA	clone 1	11.9167	98	0.979544	0.92891	0.905197	0.834944	1.05389	1.02288
BSA	clone 1	12	97	0.884571	0.897303	0.818646	0.81197	0.950497	0.982636
BSA	clone 2	-0.583333	74	0.999632	0.949334	0.896846	0.80695	1.10242	1.09172
BSA	clone 2	-0.5	77	0.992275	0.922896	0.926761	0.802624	1.05779	1.04317
BSA	clone 2	-0.416667	78	0.894015	0.95224	0.786007	0.799049	1.00202	1.10543
BSA	clone 2	-0.333333	81	0.969406	1.01891	0.863193	0.875577	1.07562	1.16223
BSA	clone 2	-0.25	68	1.03867	1.11451	0.925264	0.97152	1.15208	1.2575
BSA	clone 2	-0.166667	76	1.09622	1.07468	0.969168	0.937906	1.22328	1.21145
BSA	clone 2	-0.0833333	78	1.01826	0.979717	0.909674	0.833013	1.12685	1.12642
BSA	clone 2	0	85	0.981366	1.02678	0.860934	0.87161	1.1018	1.18196
BSA	clone 2	0.0833333	83	0.866157	0.95585	0.73588	0.797872	0.996435	1.11383
BSA	clone 2	0.25	97	0.947291	1.03019	0.868789	0.928083	1.02579	1.1323
BSA	clone 2	0.333333	100	0.973124	0.929561	0.876929	0.829174	1.06932	1.02995
BSA	clone 2	0.416667	99	1.01093	0.9707	0.929515	0.871581	1.09235	1.06982
BSA	clone 2	0.5	99	0.998887	0.929721	0.912309	0.837738	1.08546	1.02171
BSA	clone 2	0.583333	95	1.0311	0.981586	0.945859	0.877801	1.11633	1.08537
BSA	clone 2	0.666667	91	1.07078	0.934699	0.984283	0.835632	1.15727	1.03377
BSA	clone 2	0.75	94	1.00431	0.951935	0.925182	0.827587	1.08345	1.07628
BSA	clone 2	0.833333	90	1.04544	0.959071	0.955998	0.853849	1.13487	1.06429
BSA	clone 2	0.916667	86	1.01177	1.03423	0.915971	0.896237	1.10757	1.17223
BSA	clone 2	1	91	1.04669	0.952266	0.96376	0.843255	1.12961	1.06128
BSA	clone 2	1.08333	98	1.05194	1.01721	0.972477	0.909055	1.13141	1.12537
BSA	clone 2	1.16667	94	1.03767	1.02776	0.963655	0.917239	1.11169	1.13828
BSA	clone 2	1.25	89	0.969717	1.04407	0.8877	0.921531	1.05173	1.1666
BSA	clone 2	1.33333	98	0.984683	1.00246	0.910441	0.910798	1.05892	1.09411
BSA	clone 2	1.41667	93	0.970226	0.989622	0.890285	0.888182	1.05017	1.09106
BSA	clone 2	1.5	94	1.02693	1.03314	0.940449	0.885678	1.1134	1.1806
BSA	clone 2	1.58333	91	1.03357	1.07708	0.917321	0.940454	1.14982	1.21371
BSA	clone 2	1.66667	97	0.984069	1.03069	0.893064	0.903741	1.07507	1.15763
BSA	clone 2	1.75	93	1.05981	0.989246	0.969476	0.846531	1.15013	1.13196
BSA	clone 2	1.83333	100	1.07563	0.994343	0.999225	0.883036	1.15203	1.10565
BSA	clone 2	1.91667	104	1.0278	1.00326	0.93464	0.856969	1.12096	1.14954
BSA	clone 2	2	105	1.08648	0.93411	0.999069	0.829637	1.17389	1.03858
BSA	clone 2	2.08333	107	1.02699	0.922431	0.957474	0.820336	1.09651	1.02453
BSA	clone 2	2.16667	104	1.06173	0.992382	0.978154	0.873673	1.1453	1.11109
BSA	clone 2	2.25	103	1.01337	0.992415	0.948515	0.832901	1.07822	1.15193
BSA	clone 2	2.33333	104	1.02981	0.906171	0.955473	0.815305	1.10415	0.997038
BSA	clone 2	2.41667	104	0.95189	0.878504	0.87912	0.785131	1.02466	0.971878
BSA	clone 2	2.5	109	0.976156	0.930017	0.908124	0.83932	1.04419	1.02071
BSA	clone 2	2.58333	106	1.09011	0.94543	1.00067	0.851914	1.17955	1.03895
BSA	clone 2	2.66667	107	0.920325	0.925171	0.847057	0.838772	0.993592	1.01157
BSA	clone 2	2.75	112	0.971479	0.902496	0.904335	0.813794	1.03862	0.991197
BSA	clone 2	2.83333	109	0.966385	0.903329	0.896978	0.809926	1.03579	0.996732
BSA	clone 2	2.91667	107	1.00157	0.924048	0.909564	0.825098	1.09358	1.023
BSA	clone 2	3	115	1.02642	0.873679	0.957258	0.793187	1.09559	0.954172
BSA	clone 2	3.08333	110	0.976628	0.934627	0.904356	0.836475	1.0489	1.03278
BSA	clone 2	3.16667	109	1.03623	0.915372	0.950924	0.817915	1.12154	1.01283
BSA	clone 2	3.25	110	0.97558	0.938483	0.907767	0.831445	1.04339	1.04552
BSA	clone 2	3.33333	108	0.942491	0.925934	0.877711	0.828162	1.00727	1.02371
BSA	clone 2	3.41667	110	0.99194	0.867837	0.927448	0.781842	1.05643	0.953832
BSA	clone 2	3.5	112	0.893446	0.919577	0.830031	0.835881	0.956862	1.00327
BSA	clone 2	3.58333	113	0.891302	0.908984	0.825947	0.820067	0.956657	0.997901
BSA	clone 2	3.66667	104	1.01551	0.915319	0.933239	0.824327	1.09779	1.00631
BSA	clone 2	3.75	106	0.975817	0.830335	0.900022	0.749545	1.05161	0.911126
BSA	clone 2	3.83333	107	0.996601	0.867317	0.930973	0.781859	1.06223	0.952776
BSA	clone 2	3.91667	106	0.941537	0.897172	0.866959	0.800062	1.01612	0.994282
BSA	clone 2	4	109	0.952125	0.899054	0.883889	0.805009	1.02036	0.993099
BSA	clone 2	4.08333	103	0.931592	0.851301	0.852652	0.756158	1.01053	0.946444
BSA	clone 2	4.16667	103	0.954506	0.849005	0.898075	0.761266	1.01094	0.936743
BSA	clone 2	4.25	103	0.937868	0.875114	0.874975	0.778401	1.00076	0.971826
BSA	clone 2	4.33333	107	0.963484	0.866264	0.901717	0.771483	1.02525	0.961045
BSA	clone 2	4.41667	104	0.922952	0.827319	0.867554	0.737555	0.97835	0.917082
BSA	clone 2	4.5	105	0.982557	0.827873	0.913565	0.741026	1.05155	0.914719
BSA	clone 2	4.58333	106	0.95354	0.838632	0.880758	0.742844	1.02632	0.934419
BSA	clone 2	4.66667	101	0.930359	0.855184	0.868103	0.750842	0.992615	0.959526
BSA	clone 2	4.75	101	0.969494	0.764157	0.898411	0.686612	1.04058	0.841702
BSA	clone 2	4.83333	107	0.945297	0.784364	0.884783	0.711187	1.00581	0.857541
BSA	clone 2	4.91667	101	0.907341	0.794795	0.862727	0.704061	0.951955	0.88553
BSA	clone 2	5	102	0.885485	0.792805	0.825635	0.696997	0.945336	0.888613
BSA	clone 2	5.08333	107	0.862733	0.825821	0.809111	0.737696	0.916356	0.913946
BSA	clone 2	5.16667	102	0.905167	0.835823	0.841303	0.739605	0.969031	0.932042
BSA	clone 2	5.25	99	0.925757	0.809524	0.8499	0.727614	1.00161	0.891434
BSA	clone 2	5.33333	106	0.884315	0.767029	0.820526	0.699232	0.948104	0.834826
BSA	clone 2	5.41667	107	0.864668	0.789032	0.802368	0.707037	0.926968	0.871027
BSA	clone 2	5.5	113	0.927627	0.772503	0.863075	0.700043	0.992179	0.844963
BSA	clone 2	5.58333	108	0.949679	0.773115	0.879601	0.702568	1.01976	0.843662
BSA	clone 2	5.66667	110	0.916302	0.794126	0.852303	0.715665	0.980301	0.872588
BSA	clone 2	5.75	105	0.888363	0.794662	0.818982	0.714492	0.957744	0.874832
BSA	clone 2	5.83333	109	0.871163	0.78138	0.822384	0.7008	0.919942	0.86196
BSA	clone 2	5.91667	105	0.810872	0.781826	0.757824	0.705183	0.863919	0.85847
BSA	clone 2	6	110	0.870863	0.787224	0.811956	0.714048	0.929769	0.8604
BSA	clone 2	6.08333	113	0.880801	0.715994	0.826109	0.652067	0.935493	0.779921
BSA	clone 2	6.16667	99	0.832905	0.764302	0.760386	0.679259	0.905423	0.849346
BSA	clone 2	6.25	103	0.860605	0.783909	0.80166	0.696915	0.91955	0.870903
BSA	clone 2	6.33333	102	0.88245	0.789617	0.813065	0.71136	0.951835	0.867875
BSA	clone 2	6.41667	109	0.909306	0.740878	0.843093	0.653441	0.97552	0.828314
BSA	clone 2	6.5	101	0.892431	0.761711	0.828948	0.670944	0.955914	0.852478
BSA	clone 2	6.58333	102	0.826985	0.768814	0.769427	0.68331	0.884542	0.854317
BSA	clone 2	6.66667	100	0.889773	0.855997	0.83755	0.75662	0.941997	0.955374
BSA	clone 2	6.75	99	0.907864	0.778177	0.823739	0.683002	0.991989	0.873352
BSA	clone 2	6.83333	108	0.948185	0.799834	0.880156	0.700923	1.01621	0.898745
BSA	clone 2	6.91667	108	0.886868	0.813818	0.82783	0.725955	0.945906	0.901681
BSA	clone 2	7	107	0.936703	0.778411	0.864924	0.689218	1.00848	0.867605
BSA	clone 2	7.08333	106	0.887063	0.78723	0.820836	0.69268	0.95329	0.881781
BSA	clone 2	7.16667	107	0.959606	0.751532	0.879887	0.671593	1.03932	0.83147
BSA	clone 2	7.25	109	0.99646	0.739106	0.896934	0.661023	1.09599	0.817189
BSA	clone 2	7.33333	101	0.921698	0.723846	0.839114	0.644741	1.00428	0.802951
BSA	clone 2	7.41667	110	0.958764	0.724528	0.884783	0.656153	1.03275	0.792902
BSA	clone 2	7.5	108	0.928784	0.74495	0.845832	0.662703	1.01174	0.827198
BSA	clone 2	7.58333	110	0.892518	0.803996	0.833092	0.70013	0.951945	0.907863
BSA	clone 2	7.66667	108	0.846552	0.758236	0.792654	0.671661	0.900451	0.844812
BSA	clone 2	7.75	108	0.927125	0.747822	0.860331	0.650887	0.99392	0.844758
BSA	clone 2	7.83333	109	0.896913	0.751839	0.807009	0.655192	0.986816	0.848487
BSA	clone 2	7.91667	116	0.926163	0.750804	0.844202	0.661922	1.00812	0.839687
BSA	clone 2	8	111	0.921386	0.748972	0.847414	0.662721	0.995357	0.835223
BSA	clone 2	8.08333	109	0.871153	0.720856	0.805335	0.632809	0.936971	0.808904
BSA	clone 2	8.16667	106	0.858276	0.704021	0.787531	0.610515	0.929021	0.797527
BSA	clone 2	8.25	102	0.923701	0.707589	0.855378	0.632193	0.992023	0.782985
BSA	clone 2	8.33333	100	0.958068	0.695206	0.87334	0.619262	1.0428	0.77115
BSA	clone 2	8.41667	95	0.918452	0.713473	0.869095	0.64649	0.967809	0.780455
BSA	clone 2	8.5	100	0.85212	0.714875	0.785833	0.645693	0.918407	0.784057
BSA	clone 2	8.58333	99	0.881247	0.720004	0.830513	0.647274	0.931982	0.792735
BSA	clone 2	8.66667	103	0.796769	0.715617	0.747232	0.639535	0.846307	0.791698
BSA	clone 2	8.75	105	0.818714	0.727412	0.759747	0.652767	0.87768	0.802057
BSA	clone 2	8.83333	101	0.871356	0.731566	0.808689	0.65708	0.934022	0.806053
BSA	clone 2	8.91667	103	0.84621	0.73566	0.780468	0.657134	0.911952	0.814186
BSA	clone 2	9	103	0.842343	0.746157	0.784926	0.67715	0.89976	0.815164
BSA	clone 2	9.08333	104	0.804381	0.758842	0.757359	0.680201	0.851402	0.837482
BSA	clone 2	9.16667	106	0.834331	0.739226	0.775892	0.670037	0.89277	0.808415
BSA	clone 2	9.25	101	0.767029	0.709794	0.710287	0.640384	0.823771	0.779203
BSA	clone 2	9.33333	108	0.84223	0.745634	0.775461	0.67473	0.908998	0.816537
BSA	clone 2	9.41667	110	0.84022	0.726065	0.784121	0.663543	0.896319	0.788587
BSA	clone 2	9.5	107	0.818484	0.726837	0.763134	0.664339	0.873834	0.789334
BSA	clone 2	9.58333	100	0.840405	0.733037	0.780576	0.663938	0.900233	0.802136
BSA	clone 2	9.66667	102	0.800548	0.752992	0.757766	0.673828	0.84333	0.832157
BSA	clone 2	9.75	104	0.851098	0.714442	0.80059	0.649545	0.901606	0.779338
BSA	clone 2	9.83333	110	0.814016	0.722723	0.757482	0.654083	0.870551	0.791363
BSA	clone 2	9.91667	105	0.873097	0.705385	0.823322	0.634581	0.922872	0.776189
BSA	clone 2	10	103	0.828337	0.689273	0.784324	0.622541	0.87235	0.756005
BSA	clone 2	10.0833	108	0.821032	0.719607	0.770122	0.65143	0.871942	0.787784
BSA	clone 2	10.1667	106	0.85425	0.747814	0.796753	0.671345	0.911746	0.824282
BSA	clone 2	10.25	107	0.851907	0.741534	0.807331	0.653818	0.896483	0.829251
BSA	clone 2	10.3333	102	0.832159	0.702269	0.773536	0.634407	0.890782	0.770131
BSA	clone 2	10.4167	101	0.839296	0.72	0.783441	0.649756	0.895151	0.790243
BSA	clone 2	10.5	104	0.844509	0.73092	0.787692	0.652741	0.901326	0.809099
BSA	clone 2	10.5833	98	0.835826	0.71623	0.776621	0.630219	0.895031	0.802241
BSA	clone 2	10.6667	105	0.808919	0.711574	0.758934	0.638797	0.858904	0.784351
BSA	clone 2	10.75	108	0.847858	0.710862	0.789776	0.637018	0.905941	0.784705
BSA	clone 2	10.8333	100	0.842825	0.67321	0.780981	0.601705	0.904669	0.744715
BSA	clone 2	10.9167	104	0.797731	0.664015	0.734615	0.586438	0.860847	0.741592
BSA	clone 2	11	105	0.885292	0.652348	0.812533	0.580834	0.958051	0.723863
BSA	clone 2	11.0833	102	0.794702	0.62492	0.736122	0.556374	0.853282	0.693466
BSA	clone 2	11.1667	98	0.791114	0.674137	0.744301	0.587449	0.837927	0.760824
BSA	clone 2	11.25	96	0.76318	0.642752	0.716871	0.571175	0.809489	0.714328
BSA	clone 2	11.3333	107	0.812668	0.634938	0.761647	0.565103	0.863689	0.704774
BSA	clone 2	11.4167	98	0.845035	0.71339	0.788983	0.631653	0.901086	0.795127
BSA	clone 2	11.5	109	0.85243	0.677755	0.797522	0.606739	0.907339	0.748771
BSA	clone 2	11.5833	111	0.789123	0.69045	0.73788	0.620456	0.840367	0.760443
BSA	clone 2	11.6667	106	0.845838	0.708539	0.789658	0.634537	0.902018	0.782541
BSA	clone 2	11.75	104	0.820601	0.687434	0.770238	0.623566	0.870964	0.751303
BSA	clone 2	11.8333	107	0.828886	0.731899	0.781041	0.673328	0.87673	0.79047
BSA	clone 2	11.9167	112	0.819179	0.749749	0.769364	0.691526	0.868994	0.807971
BSA	clone 2	12	107	0.842349	0.708328	0.782075	0.640559	0.902622	0.776097
BSA	clone 3	-0.583333	82	0.955847	0.942298	0.859387	0.805933	1.05231	1.07866
BSA	clone 3	-0.5	77	1.08037	1.07232	0.968418	0.919503	1.19232	1.22513
BSA	clone 3	-0.416667	76	1.11744	1.01872	1.0222	0.882665	1.21268	1.15477
BSA	clone 3	-0.333333	85	0.867515	0.881084	0.760442	0.750595	0.974588	1.01157
BSA	clone 3	-0.25	76	1.10729	1.08626	0.987494	0.953368	1.22709	1.21915
BSA	clone 3	-0.166667	78	0.98126	1.06132	0.895374	0.94162	1.06715	1.18102
BSA	clone 3	-0.0833333	79	0.912345	0.95582	0.816204	0.809919	1.00849	1.10172
BSA	clone 3	0	78	0.899096	0.932993	0.7945	0.786381	1.00369	1.07961
BSA	clone 3	0.0833333	73	1.00876	0.977195	0.907978	0.819902	1.10954	1.13449
BSA	clone 3	0.25	115	1.02337	1.33429	0.952282	1.22412	1.09446	1.44446
BSA	clone 3	0.333333	117	1.05423	1.25365	0.977154	1.15541	1.13131	1.35188
BSA	clone 3	0.416667	127	1.06435	1.3088	0.992278	1.20379	1.13642	1.41381
BSA	clone 3	0.5	123	1.018	1.24401	0.948007	1.14366	1.08799	1.34436
BSA	clone 3	0.583333	127	1.0531	1.234	0.96544	1.14241	1.14076	1.3256
BSA	clone 3	0.666667	117	1.07673	1.23118	0.991403	1.13428	1.16206	1.32808
BSA	clone 3	0.75	121	1.07383	1.24769	0.985413	1.13901	1.16225	1.35637
BSA	clone 3	0.833333	120	1.05567	1.2741	0.989775	1.1654	1.12157	1.38281
BSA	clone 3	0.916667	117	1.09438	1.2114	1.02343	1.104	1.16534	1.31881
BSA	clone 3	1	115	1.12663	1.16768	1.0482	1.07285	1.20506	1.2625
BSA	clone 3	1.08333	118	1.13352	1.15508	1.05331	1.05709	1.21373	1.25306
BSA	clone 3	1.16667	116	1.09569	1.21741	1.01329	1.12134	1.1781	1.31347
BSA	clone 3	1.25	124	1.04939	1.22586	0.967931	1.12607	1.13084	1.32566
BSA	clone 3	1.33333	112	1.10046	1.25373	1.0165	1.15772	1.18441	1.34973
BSA	clone 3	1.41667	120	1.03001	1.21	0.948184	1.11089	1.11183	1.3091
BSA	clone 3	1.5	118	1.0689	1.22025	0.994643	1.12679	1.14316	1.31371
BSA	clone 3	1.58333	121	1.10422	1.27606	1.02334	1.15949	1.1851	1.39262
BSA	clone 3	1.66667	116	1.04468	1.27188	0.983423	1.16078	1.10594	1.38298
BSA	clone 3	1.75	114	1.09133	1.23346	1.0225	1.12728	1.16017	1.33964
BSA	clone 3	1.83333	120	1.05087	1.23356	0.9754	1.13261	1.12633	1.33452
BSA	clone 3	1.91667	116	1.10335	1.19732	1.03138	1.10329	1.17533	1.29135
BSA	clone 3	2	116	1.07817	1.17254	1.00388	1.07891	1.15246	1.26617
BSA	clone 3	2.08333	119	1.13272	1.16307	1.06956	1.07048	1.19588	1.25566
BSA	clone 3	2.16667	116	1.16664	1.18011	1.0965	1.08845	1.23677	1.27178
BSA	clone 3	2.25	112	1.06819	1.19779	1.00555	1.10923	1.13082	1.28635
BSA	clone 3	2.33333	108	1.11013	1.22187	1.05272	1.1332	1.16755	1.31055
BSA	clone 3	2.41667	117	1.0852	1.12516	1.01409	1.03565	1.15631	1.21466
BSA	clone 3	2.5	124	1.0462	1.17993	0.975524	1.08243	1.11687	1.27743
BSA	clone 3	2.58333	114	1.03181	1.23344	0.962863	1.12889	1.10076	1.33799
BSA	clone 3	2.66667	118	1.14749	1.19518	1.0783	1.09742	1.21667	1.29295
BSA	clone 3	2.75	128	1.10217	1.24911	1.03746	1.15159	1.16689	1.34663
BSA	clone 3	2.83333	124	1.05337	1.15992	0.989867	1.06234	1.11687	1.25749
BSA	clone 3	2.91667	118	1.06159	1.20244	0.997148	1.10498	1.12604	1.2999
BSA	clone 3	3	121	1.07807	1.24888	1.01194	1.15347	1.14421	1.34429
BSA	clone 3	3.08333	131	1.02955	1.24931	0.962534	1.14472	1.09657	1.35389
BSA	clone 3	3.16667	124	1.02444	1.25959	0.956009	1.1544	1.09288	1.36478
BSA	clone 3	3.25	123	1.10142	1.20742	1.0354	1.11089	1.16744	1.30395
BSA	clone 3	3.33333	123	1.12922	1.20937	1.06022	1.11271	1.19822	1.30603
BSA	clone 3	3.41667	123	1.03364	1.21192	0.974501	1.11552	1.09279	1.30832
BSA	clone 3	3.5	116	0.996804	1.23723	0.932827	1.12681	1.06078	1.34765
BSA	clone 3	3.58333	119	0.956123	1.20441	0.89029	1.0965	1.02196	1.31233
BSA	clone 3	3.66667	118	1.01706	1.23961	0.950951	1.13662	1.08318	1.34259
BSA	clone 3	3.75	115	1.02606	1.21509	0.967831	1.11498	1.08428	1.3152
BSA	clone 3	3.83333	115	1.01471	1.22769	0.953221	1.12158	1.07619	1.33381
BSA	clone 3	3.91667	118	1.02204	1.17348	0.961856	1.08002	1.08222	1.26694
BSA	clone 3	4	121	1.04831	1.21743	0.987281	1.11512	1.10934	1.31974
BSA	clone 3	4.08333	121	1.07118	1.23879	1.00424	1.13724	1.13811	1.34033
BSA	clone 3	4.16667	128	1.07693	1.16535	1.01366	1.07791	1.14021	1.25279
BSA	clone 3	4.25	116	1.11012	1.19799	1.04506	1.10522	1.17519	1.29076
BSA	clone 3	4.33333	120	1.03566	1.19156	0.975776	1.09571	1.09554	1.28742
BSA	clone 3	4.41667	134	1.05637	1.1772	0.996417	1.09001	1.11633	1.2644
BSA	clone 3	4.5	134	1.09618	1.20396	1.0332	1.10659	1.15915	1.30132
BSA	clone 3	4.58333	132	1.02702	1.21676	0.964799	1.12682	1.08925	1.30671
BSA	clone 3	4.66667	134	1.10875	1.15213	1.05156	1.07265	1.16594	1.23161
BSA	clone 3	4.75	119	1.05091	1.16788	0.990082	1.0847	1.11173	1.25105
BSA	clone 3	4.83333	130	0.997184	1.14882	0.945168	1.064	1.0492	1.23363
BSA	clone 3	4.91667	127	1.00512	1.22253	0.957492	1.13235	1.05275	1.31271
BSA	clone 3	5	131	1.06553	1.10841	1.00525	1.02657	1.1258	1.19024
BSA	clone 3	5.08333	131	1.01756	1.1488	0.959559	1.0618	1.07555	1.2358
BSA	clone 3	5.16667	131	1.02035	1.13425	0.957438	1.05011	1.08327	1.21838
BSA	clone 3	5.25	132	1.04851	1.14357	0.977672	1.05995	1.11935	1.22718
BSA	clone 3	5.33333	124	1.01931	1.16329	0.944006	1.07764	1.09461	1.24894
BSA	clone 3	5.41667	133	0.988963	1.14841	0.935415	1.05773	1.04251	1.23908
BSA	clone 3	5.5	126	1.02216	1.10196	0.966321	1.01054	1.078	1.19338
BSA	clone 3	5.58333	123	1.03468	1.12019	0.989058	1.03772	1.08031	1.20267
BSA	clone 3	5.66667	136	1.01502	1.11047	0.959444	1.02593	1.07059	1.19502
BSA	clone 3	5.75	135	1.06174	1.13266	0.99895	1.04924	1.12454	1.21608
BSA	clone 3	5.83333	131	1.04113	1.14805	0.976279	1.05976	1.10597	1.23633
BSA	clone 3	5.91667	129	1.08958	1.11499	1.02947	1.03201	1.14969	1.19797
BSA	clone 3	6	126	1.00935	1.0983	0.945203	1.01869	1.07349	1.17791
BSA	clone 3	6.08333	135	1.06763	1.08669	1.01112	1.00266	1.12414	1.17072
BSA	clone 3	6.16667	133	1.05497	1.08783	0.997063	1.00251	1.11288	1.17314
BSA	clone 3	6.25	128	1.07146	1.08137	1.01017	1.00606	1.13275	1.15667
BSA	clone 3	6.33333	127	1.08768	1.08202	1.02037	1.00427	1.155	1.15978
BSA	clone 3	6.41667	131	1.03126	1.03672	0.975455	0.961801	1.08706	1.11164
BSA	clone 3	6.5	131	1.01866	1.06271	0.955948	0.980809	1.08138	1.14461
BSA	clone 3	6.58333	122	1.05443	1.13897	0.993421	1.04313	1.11543	1.23481
BSA	clone 3	6.66667	134	0.948212	1.08157	0.898264	1.00725	0.99816	1.15588
BSA	clone 3	6.75	134	0.963107	1.14815	0.905157	1.0665	1.02106	1.2298
BSA	clone 3	6.83333	128	1.02536	1.12035	0.971491	1.0368	1.07923	1.2039
BSA	clone 3	6.91667	136	0.963459	1.12335	0.911948	1.04168	1.01497	1.20501
BSA	clone 3	7	131	1.01894	1.14925	0.968655	1.07306	1.06922	1.22543
BSA	clone 3	7.08333	121	1.04749	1.15327	0.993408	1.07287	1.10157	1.23367
BSA	clone 3	7.16667	137	1.00493	1.13717	0.951216	1.0619	1.05864	1.21244
BSA	clone 3	7.25	143	1.02408	1.17716	0.973009	1.10225	1.07516	1.25207
BSA	clone 3	7.33333	141	1.05043	1.15555	0.994484	1.07776	1.10638	1.23333
BSA	clone 3	7.41667	140	1.01358	1.14633	0.961769	1.06717	1.06539	1.22549
BSA	clone 3	7.5	136	0.982446	1.16159	0.928709	1.08579	1.03618	1.23738
BSA	clone 3	7.58333	139	1.01574	1.13482	0.962065	1.0466	1.06942	1.22304
BSA	clone 3	7.66667	144	1.027	1.11991	0.964262	1.04278	1.08973	1.19704
BSA	clone 3	7.75	140	1.04164	1.10982	0.983046	1.02942	1.10024	1.19022
BSA	clone 3	7.83333	154	1.02086	1.14058	0.95914	1.06357	1.08257	1.21758
BSA	clone 3	7.91667	142	1.04169	1.09251	0.98883	1.01049	1.09456	1.17452
BSA	clone 3	8	145	1.05383	1.12743	0.987604	1.03723	1.12006	1.21763
BSA	clone 3	8.08333	150	1.03218	1.08975	0.973777	1.01404	1.09058	1.16547
BSA	clone 3	8.16667	145	0.967604	1.08646	0.91426	1.01214	1.02095	1.16078
BSA	clone 3	8.25	144	0.946233	1.08996	0.893818	1.01309	0.998649	1.16683
BSA	clone 3	8.33333	145	0.977427	1.11551	0.925959	1.03192	1.0289	1.19911
BSA	clone 3	8.41667	139	0.978054	1.12414	0.928775	1.04105	1.02733	1.20724
BSA	clone 3	8.5	147	0.970959	1.10264	0.917015	1.01785	1.0249	1.18744
BSA	clone 3	8.58333	144	1.01943	1.07847	0.954751	1.00751	1.0841	1.14942
BSA	clone 3	8.66667	140	1.01133	1.05949	0.942081	0.981733	1.08059	1.13724
BSA	clone 3	8.75	149	0.988347	1.07277	0.94026	0.999054	1.03644	1.14648
BSA	clone 3	8.83333	144	0.970339	1.06694	0.918442	0.993606	1.02224	1.14027
BSA	clone 3	8.91667	144	1.02852	1.07389	0.975105	1.00366	1.08194	1.14412
BSA	clone 3	9	140	0.984529	1.09076	0.931621	1.01913	1.03744	1.1624
BSA	clone 3	9.08333	144	1.00714	1.12749	0.956086	1.03402	1.05819	1.22096
BSA	clone 3	9.16667	140	0.977002	1.06527	0.923334	0.993436	1.03067	1.13711
BSA	clone 3	9.25	147	1.04816	1.09739	0.993181	1.02163	1.10314	1.17314
BSA	clone 3	9.33333	150	1.02245	1.06234	0.968399	0.993472	1.0765	1.13121
BSA	clone 3	9.41667	148	1.00055	1.08065	0.949837	1.00726	1.05126	1.15404
BSA	clone 3	9.5	156	1.0681	1.07473	1.01485	1.00872	1.12136	1.14073
BSA	clone 3	9.58333	146	1.01421	1.0659	0.96201	0.993231	1.06642	1.13857
BSA	clone 3	9.66667	146	0.991121	1.01365	0.948677	0.947702	1.03356	1.0796
BSA	clone 3	9.75	140	0.970825	1.04355	0.919321	0.977478	1.02233	1.10963
BSA	clone 3	9.83333	137	1.04515	1.05953	0.992711	0.992785	1.09758	1.12627
BSA	clone 3	9.91667	149	0.970119	1.05246	0.914277	0.984812	1.02596	1.12011
BSA	clone 3	10	147	0.995973	1.05032	0.937149	0.990399	1.0548	1.11024
BSA	clone 3	10.0833	147	1.02884	1.04932	0.974175	0.989802	1.08351	1.10885
BSA	clone 3	10.1667	147	1.01877	1.08233	0.964517	1.01389	1.07301	1.15077
BSA	clone 3	10.25	155	0.950528	1.01907	0.899676	0.955701	1.00138	1.08245
BSA	clone 3	10.3333	145	1.01284	1.05261	0.946242	0.985983	1.07945	1.11924
BSA	clone 3	10.4167	151	1.03644	1.06564	0.978059	0.99755	1.09483	1.13373
BSA	clone 3	10.5	144	0.969111	1.06383	0.916344	0.997019	1.02188	1.13065
BSA	clone 3	10.5833	148	0.95456	1.04038	0.908354	0.969963	1.00077	1.1108
BSA	clone 3	10.6667	151	0.983097	1.07662	0.923785	1.00901	1.04241	1.14423
BSA	clone 3	10.75	145	0.959994	1.03652	0.908572	0.972388	1.01142	1.10065
BSA	clone 3	10.8333	149	0.985157	1.09335	0.93155	1.02248	1.03876	1.16423
BSA	clone 3	10.9167	147	0.927641	1.04416	0.874901	0.973752	0.980381	1.11458
BSA	clone 3	11	153	0.926044	1.04835	0.883055	0.971463	0.969033	1.12525
BSA	clone 3	11.0833	151	0.935072	1.04647	0.893307	0.978349	0.976838	1.11459
BSA	clone 3	11.1667	155	0.916062	1.01592	0.86976	0.949886	0.962364	1.08196
BSA	clone 3	11.25	150	0.978848	1.03407	0.926777	0.964262	1.03092	1.10389
BSA	clone 3	11.3333	157	0.884413	1.04675	0.837339	0.973278	0.931486	1.12023
BSA	clone 3	11.4167	146	0.892263	1.02002	0.844296	0.947153	0.94023	1.09288
BSA	clone 3	11.5	148	0.967077	1.03168	0.919964	0.958389	1.01419	1.10498
BSA	clone 3	11.5833	153	0.921054	0.990886	0.861912	0.918398	0.980196	1.06338
BSA	clone 3	11.6667	155	0.93654	1.01785	0.887553	0.943736	0.985528	1.09195
BSA	clone 3	11.75	152	0.904712	1.05798	0.860962	0.984905	0.948462	1.13105
BSA	clone 3	11.8333	149	0.990714	1.00159	0.938745	0.93575	1.04268	1.06743
BSA	clone 3	11.9167	158	0.945783	0.982266	0.897151	0.918815	0.994415	1.04572
BSA	clone 3	12	148	0.999524	0.98302	0.951634	0.914558	1.04741	1.05148
WNT100	clone 1	-0.583333	62	1.07958	1.07954	0.96091	0.915675	1.19825	1.24341
WNT100	clone 1	-0.5	64	1.21919	1.27483	1.1223	1.12381	1.31608	1.42585
WNT100	clone 1	-0.416667	76	0.864778	0.899194	0.764963	0.747438	0.964594	1.05095
WNT100	clone 1	-0.333333	77	0.969478	0.920149	0.85065	0.766174	1.08831	1.07412
WNT100	clone 1	-0.25	65	0.963329	0.921316	0.872954	0.780411	1.0537	1.06222
WNT100	clone 1	-0.166667	79	0.841323	0.872887	0.743856	0.738522	0.938791	1.00725
WNT100	clone 1	-0.0833333	60	1.14307	1.10742	1.05571	0.957502	1.23043	1.25734
WNT100	clone 1	0	89	0.904001	0.799569	0.811806	0.679322	0.996196	0.919815
WNT100	clone 1	0.0833333	60	1.27101	1.10878	1.17105	0.955601	1.37096	1.26197
WNT100	clone 1	0.166667	68	1.09235	1.02656	1.00728	0.897611	1.17742	1.15551
WNT100	clone 1	0.25	84	0.831316	0.923294	0.738066	0.78334	0.924566	1.06325
WNT100	clone 1	0.333333	74	0.986855	0.984568	0.886613	0.856433	1.0871	1.1127
WNT100	clone 1	0.416667	67	1.10688	1.13557	0.988794	0.997985	1.22497	1.27316
WNT100	clone 1	0.5	87	0.963483	0.935372	0.874392	0.79541	1.05257	1.07533
WNT100	clone 1	0.583333	84	0.978715	0.907723	0.871517	0.772322	1.08591	1.04312
WNT100	clone 1	0.666667	90	1.0032	0.953179	0.894286	0.817614	1.11212	1.08874
WNT100	clone 1	0.75	73	1.11923	1.07962	0.990689	0.921016	1.24777	1.23822
WNT100	clone 1	0.833333	90	1.1012	1.06257	0.998616	0.92712	1.20378	1.19803
WNT100	clone 1	0.916667	80	1.21327	1.19374	1.1021	1.03996	1.32443	1.34752
WNT100	clone 1	1.08333	100	1.56788	1.63787	1.47512	1.49228	1.66065	1.78346
WNT100	clone 1	1.16667	98	1.47824	1.62299	1.38336	1.48825	1.57311	1.75772
WNT100	clone 1	1.25	90	1.63282	1.76507	1.54604	1.60117	1.7196	1.92897
WNT100	clone 1	1.33333	102	1.57211	1.8311	1.47962	1.68913	1.66459	1.97306
WNT100	clone 1	1.41667	104	1.614	1.7831	1.5375	1.66147	1.69051	1.90473
WNT100	clone 1	1.5	101	1.54554	1.81795	1.45245	1.68376	1.63863	1.95213
WNT100	clone 1	1.58333	106	1.74833	1.87064	1.65909	1.72946	1.83757	2.01182
WNT100	clone 1	1.66667	105	1.78655	1.94233	1.70723	1.78103	1.86588	2.10363
WNT100	clone 1	1.75	108	1.79379	1.97224	1.69491	1.81792	1.89267	2.12656
WNT100	clone 1	1.83333	110	1.93865	2.02678	1.84676	1.88161	2.03054	2.17196
WNT100	clone 1	1.91667	105	1.82476	2.03028	1.72953	1.87932	1.92	2.18124
WNT100	clone 1	2	104	1.81077	2.10364	1.6831	1.93343	1.93843	2.27385
WNT100	clone 1	2.08333	106	1.96123	2.1493	1.86104	2.00177	2.06143	2.29683
WNT100	clone 1	2.16667	106	1.99533	2.11793	1.90216	1.97122	2.0885	2.26464
WNT100	clone 1	2.25	114	2.09531	2.13743	1.99089	1.99045	2.19974	2.28442
WNT100	clone 1	2.33333	110	2.20636	2.23298	2.10862	2.0805	2.30411	2.38545
WNT100	clone 1	2.41667	112	2.08839	2.23039	1.95854	2.07666	2.21823	2.38413
WNT100	clone 1	2.5	113	2.19269	2.25339	2.08798	2.09368	2.2974	2.4131
WNT100	clone 1	2.58333	115	2.07478	2.29336	1.93859	2.14549	2.21096	2.44123
WNT100	clone 1	2.66667	115	2.27823	2.25749	2.12032	2.10502	2.43615	2.40995
WNT100	clone 1	2.75	120	2.18422	2.33938	2.06538	2.18183	2.30305	2.49693
WNT100	clone 1	2.83333	115	2.22297	2.42338	2.0999	2.26122	2.34605	2.58553
WNT100	clone 1	2.91667	111	2.30156	2.522	2.17671	2.34585	2.42642	2.69815
WNT100	clone 1	3	110	2.39274	2.4627	2.28435	2.30266	2.50112	2.62274
WNT100	clone 1	3.08333	116	2.38393	2.51234	2.26215	2.34964	2.50571	2.67505
WNT100	clone 1	3.16667	115	2.38325	2.51524	2.23953	2.34347	2.52697	2.68701
WNT100	clone 1	3.25	114	2.44481	2.55451	2.33356	2.37835	2.55606	2.73066
WNT100	clone 1	3.33333	111	2.58115	2.65498	2.44699	2.46969	2.7153	2.84028
WNT100	clone 1	3.41667	110	2.39494	2.68663	2.26947	2.50643	2.52041	2.86683
WNT100	clone 1	3.5	116	2.32108	2.6153	2.16813	2.43767	2.47403	2.79294
WNT100	clone 1	3.58333	108	2.53411	2.6309	2.40367	2.44857	2.66455	2.81323
WNT100	clone 1	3.66667	104	2.48459	2.67867	2.31941	2.48337	2.64978	2.87398
WNT100	clone 1	3.75	114	2.59885	2.80272	2.47608	2.59116	2.72161	3.01428
WNT100	clone 1	3.83333	110	2.72268	2.69493	2.60525	2.51646	2.84012	2.87341
WNT100	clone 1	3.91667	109	2.62631	2.69643	2.50088	2.51973	2.75173	2.87313
WNT100	clone 1	4	112	2.70475	2.72937	2.58606	2.5442	2.82343	2.91454
WNT100	clone 1	4.08333	113	2.77394	2.8281	2.64445	2.63784	2.90344	3.01835
WNT100	clone 1	4.16667	112	2.67326	2.81834	2.52881	2.62504	2.8177	3.01164
WNT100	clone 1	4.25	111	2.684	2.73725	2.54512	2.55244	2.82287	2.92206
WNT100	clone 1	4.33333	107	2.59086	2.7082	2.46607	2.51012	2.71565	2.90628
WNT100	clone 1	4.41667	108	2.58532	2.90834	2.44013	2.72578	2.7305	3.0909
WNT100	clone 1	4.5	115	2.56436	2.86234	2.40531	2.67173	2.72341	3.05294
WNT100	clone 1	4.58333	112	2.85293	2.88007	2.72602	2.68543	2.97985	3.07471
WNT100	clone 1	4.66667	109	2.8365	2.93683	2.69994	2.72825	2.97305	3.14541
WNT100	clone 1	4.75	104	2.6477	2.90607	2.4964	2.70923	2.79899	3.10292
WNT100	clone 1	4.83333	118	2.682	2.86157	2.52	2.66732	2.844	3.05581
WNT100	clone 1	4.91667	108	2.61581	2.88221	2.46126	2.67658	2.77036	3.08785
WNT100	clone 1	5	111	2.74511	2.93885	2.59019	2.73415	2.90004	3.14355
WNT100	clone 1	5.08333	105	2.76363	3.04044	2.61842	2.82392	2.90883	3.25695
WNT100	clone 1	5.16667	110	2.8476	3.09015	2.71844	2.88855	2.97677	3.29176
WNT100	clone 1	5.25	105	2.85171	3.01457	2.71573	2.80467	2.98768	3.22446
WNT100	clone 1	5.33333	103	2.70432	3.03898	2.53023	2.81553	2.87842	3.26243
WNT100	clone 1	5.41667	103	2.6936	3.03881	2.5138	2.81938	2.8734	3.25825
WNT100	clone 1	5.5	105	2.86346	3.06724	2.69312	2.84491	3.0338	3.28957
WNT100	clone 1	5.58333	112	2.78898	3.00552	2.6464	2.79861	2.93155	3.21244
WNT100	clone 1	5.66667	108	2.67838	3.00189	2.5247	2.78973	2.83207	3.21405
WNT100	clone 1	5.75	109	2.95425	3.07253	2.79695	2.86592	3.11155	3.27915
WNT100	clone 1	5.83333	102	2.72984	3.06648	2.56486	2.86102	2.89482	3.27194
WNT100	clone 1	5.91667	110	2.72086	3.01068	2.56818	2.80837	2.87355	3.213
WNT100	clone 1	6	105	2.77014	3.03065	2.60792	2.82039	2.93236	3.24091
WNT100	clone 1	6.08333	110	2.84988	3.01615	2.68296	2.80331	3.01679	3.22899
WNT100	clone 1	6.16667	116	2.97499	2.99967	2.84154	2.79823	3.10845	3.20112
WNT100	clone 1	6.25	117	2.74425	2.96565	2.55768	2.74498	2.93082	3.18632
WNT100	clone 1	6.33333	117	2.88453	2.96451	2.72192	2.74331	3.04713	3.18571
WNT100	clone 1	6.41667	108	2.85142	3.21099	2.69939	2.973	3.00344	3.44899
WNT100	clone 1	6.5	108	2.9813	3.02503	2.82016	2.7962	3.14243	3.25385
WNT100	clone 1	6.58333	113	2.88409	3.00857	2.72535	2.79096	3.04282	3.22617
WNT100	clone 1	6.66667	113	2.93205	3.04792	2.76788	2.82645	3.09623	3.2694
WNT100	clone 1	6.75	116	2.91605	3.03743	2.76484	2.82272	3.06725	3.25213
WNT100	clone 1	6.83333	115	2.97799	3.08498	2.82806	2.86161	3.12791	3.30835
WNT100	clone 1	6.91667	114	2.88124	2.98349	2.73413	2.76336	3.02835	3.20362
WNT100	clone 1	7	113	2.78622	3.0166	2.62736	2.79295	2.94507	3.24025
WNT100	clone 1	7.08333	112	2.75988	2.93809	2.59807	2.72334	2.9217	3.15284
WNT100	clone 1	7.16667	113	2.7045	2.99373	2.54361	2.76134	2.8654	3.22612
WNT100	clone 1	7.25	116	2.98647	3.00268	2.8477	2.78228	3.12524	3.22309
WNT100	clone 1	7.33333	117	2.83534	2.98085	2.68585	2.76333	2.98482	3.19837
WNT100	clone 1	7.41667	111	2.68848	2.92834	2.53782	2.70977	2.83915	3.14691
WNT100	clone 1	7.5	119	2.81453	3.04796	2.66581	2.82888	2.96326	3.26703
WNT100	clone 1	7.58333	111	2.81305	2.99733	2.66368	2.77193	2.96242	3.22274
WNT100	clone 1	7.66667	124	2.75574	3.00367	2.60761	2.78793	2.90387	3.21941
WNT100	clone 1	7.75	118	2.89325	3.0065	2.72128	2.76866	3.06521	3.24433
WNT100	clone 1	7.83333	118	2.89979	2.98779	2.75191	2.76823	3.04768	3.20736
WNT100	clone 1	7.91667	123	2.80202	3.04515	2.62265	2.81866	2.98139	3.27164
WNT100	clone 1	8	118	2.76768	2.91257	2.59399	2.69097	2.94137	3.13416
WNT100	clone 1	8.08333	114	2.90706	2.87421	2.7441	2.65514	3.07003	3.09329
WNT100	clone 1	8.16667	118	2.86084	2.85028	2.68478	2.62965	3.0369	3.0709
WNT100	clone 1	8.25	126	2.83721	2.84983	2.66538	2.63216	3.00903	3.0675
WNT100	clone 1	8.33333	121	2.70227	2.81614	2.53323	2.5888	2.87131	3.04349
WNT100	clone 1	8.41667	118	2.95351	2.84919	2.76692	2.62426	3.1401	3.07413
WNT100	clone 1	8.5	117	2.90484	2.85102	2.73563	2.61551	3.07404	3.08654
WNT100	clone 1	8.58333	118	2.80928	2.82548	2.63885	2.58646	2.97971	3.06451
WNT100	clone 1	8.66667	116	2.72853	2.68406	2.54083	2.44284	2.91622	2.92527
WNT100	clone 1	8.75	123	2.95929	2.8301	2.78055	2.58956	3.13803	3.07064
WNT100	clone 1	8.83333	118	2.92755	2.86619	2.73901	2.60893	3.1161	3.12344
WNT100	clone 1	8.91667	114	2.70947	2.89624	2.50585	2.6496	2.91308	3.14288
WNT100	clone 1	9	115	2.87625	2.89327	2.68661	2.64142	3.06589	3.14511
WNT100	clone 1	9.08333	116	2.79998	2.90154	2.61316	2.66031	2.98679	3.14276
WNT100	clone 1	9.16667	115	2.92191	2.98638	2.73168	2.73622	3.11213	3.23654
WNT100	clone 1	9.25	119	2.92111	2.87452	2.71518	2.62452	3.12704	3.12453
WNT100	clone 1	9.33333	120	2.89956	2.95764	2.70305	2.71174	3.09606	3.20355
WNT100	clone 1	9.41667	119	2.84491	2.93641	2.65894	2.69992	3.03088	3.1729
WNT100	clone 1	9.5	111	2.80828	2.90599	2.61773	2.65816	2.99882	3.15382
WNT100	clone 1	9.58333	118	2.68334	2.85898	2.49572	2.61043	2.87095	3.10753
WNT100	clone 1	9.66667	118	2.90349	2.86958	2.69088	2.62845	3.1161	3.11071
WNT100	clone 1	9.75	116	2.68479	2.9188	2.47794	2.65706	2.89165	3.18054
WNT100	clone 1	9.83333	114	2.76169	2.89068	2.55115	2.62375	2.97223	3.15762
WNT100	clone 1	9.91667	115	2.90573	2.89948	2.71956	2.64089	3.09191	3.15808
WNT100	clone 1	10	115	2.96507	2.9568	2.75945	2.69133	3.17069	3.22226
WNT100	clone 1	10.0833	112	2.95094	2.87378	2.76154	2.61014	3.14034	3.13742
WNT100	clone 1	10.1667	116	2.91433	2.91696	2.72172	2.65721	3.10694	3.1767
WNT100	clone 1	10.25	114	2.78674	2.87379	2.60736	2.62187	2.96613	3.12572
WNT100	clone 1	10.3333	109	2.90872	2.94495	2.7227	2.69232	3.09474	3.19758
WNT100	clone 1	10.4167	113	2.93349	2.9475	2.7342	2.67065	3.13279	3.22435
WNT100	clone 1	10.5	118	2.88585	2.9398	2.69965	2.68728	3.07205	3.19231
WNT100	clone 1	10.5833	116	2.82699	2.82899	2.62901	2.57534	3.02498	3.08264
WNT100	clone 1	10.6667	111	2.7868	2.90638	2.58795	2.64161	2.98565	3.17116
WNT100	clone 1	10.75	111	2.96279	2.8936	2.7554	2.65159	3.17019	3.13561
WNT100	clone 1	10.8333	114	2.86228	2.93404	2.65598	2.69366	3.06859	3.17442
WNT100	clone 1	10.9167	119	2.76433	2.89097	2.57401	2.64317	2.95464	3.13876
WNT100	clone 1	11	116	2.97251	2.86858	2.74112	2.61973	3.20389	3.11742
WNT100	clone 1	11.0833	115	2.89301	2.91185	2.69107	2.65986	3.09496	3.16384
WNT100	clone 1	11.1667	121	2.86788	2.97637	2.68209	2.71817	3.05368	3.23456
WNT100	clone 1	11.25	118	3.0387	2.88006	2.83137	2.64207	3.24603	3.11805
WNT100	clone 1	11.3333	113	2.93927	2.92617	2.71392	2.66957	3.16462	3.18276
WNT100	clone 1	11.4167	115	2.76975	2.90045	2.55353	2.64921	2.98596	3.15169
WNT100	clone 1	11.5	116	2.83423	2.89121	2.6399	2.6538	3.02856	3.12862
WNT100	clone 1	11.5833	113	2.97425	2.79187	2.76592	2.55083	3.18257	3.03292
WNT100	clone 1	11.6667	122	2.93881	2.85196	2.74304	2.60817	3.13458	3.09576
WNT100	clone 1	11.75	121	2.79068	2.8662	2.54867	2.60639	3.03268	3.126
WNT100	clone 1	11.8333	115	2.85793	2.83718	2.63613	2.58123	3.07974	3.09313
WNT100	clone 1	11.9167	116	2.75826	2.84539	2.52968	2.59245	2.98684	3.09833
WNT100	clone 1	12	115	2.6681	2.83016	2.44636	2.57717	2.88985	3.08315
WNT100	clone 2	-0.583333	29	0.999621	1.02316	0.797155	0.679597	1.20209	1.36673
WNT100	clone 2	-0.5	38	0.898484	0.803405	0.728155	0.553201	1.06881	1.05361
WNT100	clone 2	-0.416667	39	0.992914	0.906328	0.777729	0.627371	1.2081	1.18529
WNT100	clone 2	-0.333333	27	1.05277	1.13166	0.868659	0.74118	1.23688	1.52213
WNT100	clone 2	-0.25	19	1.3503	1.26189	1.14644	0.809972	1.55415	1.71381
WNT100	clone 2	-0.166667	26	1.08365	1.05207	0.88203	0.65337	1.28528	1.45078
WNT100	clone 2	-0.0833333	38	0.839198	1.01494	0.679981	0.665426	0.998415	1.36445
WNT100	clone 2	0	23	0.752599	0.521982	0.581865	0.361241	0.923333	0.682723
WNT100	clone 2	0.0833333	38	0.866483	0.925758	0.6865	0.595944	1.04647	1.25557
WNT100	clone 2	0.25	56	1.44382	1.76047	1.28948	1.49945	1.59817	2.0215
WNT100	clone 2	0.333333	45	1.50193	1.90216	1.3233	1.59278	1.68056	2.21153
WNT100	clone 2	0.416667	53	1.33414	1.60452	1.20711	1.38525	1.46117	1.8238
WNT100	clone 2	0.5	44	1.45916	1.77436	1.27395	1.48104	1.64436	2.06769
WNT100	clone 2	0.583333	61	1.2262	1.64122	1.08778	1.40866	1.36462	1.87377
WNT100	clone 2	0.666667	46	1.55957	2.20535	1.36991	1.83514	1.74924	2.57556
WNT100	clone 2	0.75	55	1.51828	1.9629	1.33296	1.65972	1.7036	2.26607
WNT100	clone 2	0.833333	43	1.59536	2.03414	1.41987	1.6748	1.77084	2.39347
WNT100	clone 2	0.916667	55	1.48965	1.9271	1.3392	1.59683	1.6401	2.25738
WNT100	clone 2	1	43	1.76605	2.29516	1.55529	1.91006	1.9768	2.68026
WNT100	clone 2	1.08333	47	1.68786	2.10309	1.47073	1.79819	1.905	2.40799
WNT100	clone 2	1.16667	45	1.86759	2.24257	1.63634	1.83522	2.09884	2.64991
WNT100	clone 2	1.25	49	1.79943	2.41216	1.57278	2.00849	2.02609	2.81583
WNT100	clone 2	1.33333	42	2.16172	2.78328	1.89028	2.27328	2.43317	3.29328
WNT100	clone 2	1.41667	51	1.78779	2.49428	1.55709	2.09628	2.01848	2.89227
WNT100	clone 2	1.5	45	1.94718	2.87935	1.72361	2.4374	2.17074	3.3213
WNT100	clone 2	1.58333	60	1.15131	1.67688	0.987115	1.3369	1.3155	2.01685
WNT100	clone 2	1.66667	52	1.95552	2.73885	1.70402	2.32968	2.20701	3.14801
WNT100	clone 2	1.75	62	1.94	2.58392	1.71534	2.24184	2.16467	2.92599
WNT100	clone 2	1.83333	54	1.99894	2.81989	1.77201	2.36639	2.22587	3.2734
WNT100	clone 2	1.91667	63	1.93177	2.56847	1.65088	2.19249	2.21265	2.94445
WNT100	clone 2	2	60	1.91965	2.65546	1.69533	2.27067	2.14396	3.04024
WNT100	clone 2	2.08333	60	1.83839	2.80694	1.62136	2.3842	2.05542	3.22967
WNT100	clone 2	2.16667	62	1.29876	1.85176	1.09349	1.47442	1.50402	2.2291
WNT100	clone 2	2.25	64	1.9623	2.66092	1.766	2.27059	2.1586	3.05124
WNT100	clone 2	2.33333	58	2.1317	2.99934	1.87029	2.46386	2.39312	3.53483
WNT100	clone 2	2.41667	63	1.84613	2.55797	1.65617	2.18645	2.03608	2.92948
WNT100	clone 2	2.5	59	2.15125	2.80686	1.91457	2.37099	2.38793	3.24274
WNT100	clone 2	2.58333	56	2.23083	3.0785	2.00243	2.61189	2.45922	3.54511
WNT100	clone 2	2.66667	60	1.95308	2.7641	1.7191	2.36445	2.18706	3.16374
WNT100	clone 2	2.75	61	2.22027	3.247	1.99741	2.77143	2.44312	3.72256
WNT100	clone 2	2.83333	67	2.25618	3.28428	2.03377	2.81808	2.47858	3.75047
WNT100	clone 2	2.91667	65	2.24344	3.33817	2.03859	2.93035	2.44829	3.74599
WNT100	clone 2	3	63	2.21774	3.10738	1.99619	2.74959	2.43928	3.46517
WNT100	clone 2	3.08333	64	2.3867	3.5375	2.12334	3.11711	2.65007	3.95789
WNT100	clone 2	3.16667	64	2.4257	3.54262	2.16736	3.09199	2.68404	3.99325
WNT100	clone 2	3.25	62	2.4756	3.521	2.22787	3.0736	2.72333	3.9684
WNT100	clone 2	3.33333	71	2.32831	3.40973	2.0761	2.99531	2.58051	3.82416
WNT100	clone 2	3.41667	69	2.41993	3.48276	2.15868	3.07554	2.68119	3.88997
WNT100	clone 2	3.5	69	2.53487	3.56047	2.28345	3.11894	2.78628	4.00201
WNT100	clone 2	3.58333	73	2.48481	3.61502	2.23933	3.21874	2.7303	4.01129
WNT100	clone 2	3.66667	71	2.51188	3.62485	2.26033	3.22091	2.76342	4.02879
WNT100	clone 2	3.75	74	2.52028	3.68085	2.26358	3.30246	2.77698	4.05925
WNT100	clone 2	3.83333	69	2.31742	3.4683	2.09149	3.0725	2.54335	3.86409
WNT100	clone 2	3.91667	69	2.3394	3.65696	2.10607	3.25702	2.57272	4.05691
WNT100	clone 2	4	67	2.38068	3.60083	2.14803	3.18685	2.61332	4.01481
WNT100	clone 2	4.08333	71	2.70875	3.6963	2.47487	3.32215	2.94262	4.07046
WNT100	clone 2	4.16667	72	2.64888	3.69599	2.4051	3.33	2.89267	4.06199
WNT100	clone 2	4.25	71	2.50561	3.57018	2.29015	3.19074	2.72108	3.94961
WNT100	clone 2	4.33333	77	2.65721	3.66858	2.42708	3.30498	2.88734	4.03218
WNT100	clone 2	4.41667	75	2.70042	3.5319	2.43871	3.17855	2.96213	3.88526
WNT100	clone 2	4.5	75	2.60663	3.68248	2.36748	3.32687	2.84577	4.03809
WNT100	clone 2	4.58333	71	2.68931	3.65321	2.4499	3.26972	2.92871	4.0367
WNT100	clone 2	4.66667	80	2.76193	3.65512	2.49494	3.31197	3.02891	3.99827
WNT100	clone 2	4.75	76	2.7578	3.83619	2.52949	3.43482	2.98611	4.23757
WNT100	clone 2	4.83333	80	2.57586	3.70297	2.3497	3.30378	2.80201	4.10216
WNT100	clone 2	4.91667	76	2.58338	3.65844	2.34262	3.2641	2.82414	4.05279
WNT100	clone 2	5	81	2.58736	3.7153	2.36084	3.33642	2.81387	4.09418
WNT100	clone 2	5.08333	80	2.7842	3.86589	2.56906	3.49789	2.99934	4.23388
WNT100	clone 2	5.16667	82	2.74568	3.78502	2.49408	3.41697	2.99729	4.15306
WNT100	clone 2	5.25	78	2.55501	3.86633	2.34215	3.47766	2.76787	4.255
WNT100	clone 2	5.33333	82	2.78828	3.75058	2.57161	3.39723	3.00494	4.10393
WNT100	clone 2	5.41667	82	1.96399	2.68913	1.75201	2.34278	2.17597	3.03548
WNT100	clone 2	5.5	86	2.77366	3.83342	2.52047	3.44315	3.02684	4.22368
WNT100	clone 2	5.58333	86	2.6667	3.80129	2.44606	3.45975	2.88733	4.14283
WNT100	clone 2	5.66667	81	2.87178	3.88654	2.62859	3.51685	3.11497	4.25622
WNT100	clone 2	5.75	89	2.83115	3.82872	2.59782	3.46917	3.06447	4.18827
WNT100	clone 2	5.83333	84	2.91498	3.95943	2.66707	3.55304	3.16288	4.36583
WNT100	clone 2	5.91667	91	2.96653	3.94759	2.74794	3.58144	3.18513	4.31375
WNT100	clone 2	6	89	2.17002	2.84521	1.98926	2.54478	2.35079	3.14563
WNT100	clone 2	6.08333	88	2.55364	3.95627	2.34174	3.58221	2.76554	4.33034
WNT100	clone 2	6.16667	85	2.85745	3.96676	2.61886	3.62776	3.09604	4.30576
WNT100	clone 2	6.25	90	2.9164	4.01563	2.68432	3.67757	3.14847	4.35368
WNT100	clone 2	6.33333	85	2.88308	3.93523	2.63273	3.59498	3.13342	4.27548
WNT100	clone 2	6.41667	89	2.91104	4.04016	2.69099	3.69118	3.13109	4.38915
WNT100	clone 2	6.5	83	2.81769	3.78615	2.58213	3.43712	3.05325	4.13519
WNT100	clone 2	6.58333	89	3.01322	4.09451	2.77011	3.70095	3.25632	4.48807
WNT100	clone 2	6.66667	91	2.94653	4.08246	2.70814	3.72164	3.18491	4.44328
WNT100	clone 2	6.75	91	3.05521	4.01874	2.83049	3.65246	3.27993	4.38503
WNT100	clone 2	6.83333	89	2.93713	4.08331	2.72295	3.71331	3.15131	4.4533
WNT100	clone 2	6.91667	87	3.0052	3.96517	2.7695	3.61267	3.2409	4.31768
WNT100	clone 2	7	91	2.70992	3.82886	2.4839	3.51197	2.93594	4.14576
WNT100	clone 2	7.08333	87	2.88062	3.98203	2.61249	3.62752	3.14876	4.33654
WNT100	clone 2	7.16667	84	2.91494	3.99287	2.6804	3.61902	3.14949	4.36672
WNT100	clone 2	7.25	89	2.9485	4.01054	2.71218	3.64271	3.18482	4.37838
WNT100	clone 2	7.33333	86	2.8261	3.89576	2.5761	3.53334	3.07611	4.25817
WNT100	clone 2	7.41667	79	2.93401	4.01434	2.6876	3.65532	3.18041	4.37337
WNT100	clone 2	7.5	90	2.95473	4.02932	2.71428	3.68392	3.19519	4.37473
WNT100	clone 2	7.58333	82	2.73323	3.76475	2.51713	3.42177	2.94934	4.10774
WNT100	clone 2	7.66667	83	2.92018	3.78456	2.67681	3.42334	3.16354	4.14578
WNT100	clone 2	7.75	88	2.74583	3.72405	2.50127	3.35471	2.99039	4.09339
WNT100	clone 2	7.83333	92	2.97734	3.85653	2.72658	3.47983	3.22809	4.23323
WNT100	clone 2	7.91667	91	3.01572	3.81246	2.76727	3.44372	3.26417	4.1812
WNT100	clone 2	8	90	3.00898	3.86467	2.76413	3.48592	3.25383	4.24343
WNT100	clone 2	8.08333	91	2.95486	4.01382	2.71333	3.62303	3.1964	4.40461
WNT100	clone 2	8.16667	88	2.98767	4.02186	2.716	3.60595	3.25935	4.43778
WNT100	clone 2	8.25	88	2.93189	3.88217	2.69993	3.48959	3.16385	4.27476
WNT100	clone 2	8.33333	93	3.0989	4.18339	2.86311	3.78004	3.33469	4.58673
WNT100	clone 2	8.41667	93	2.93745	4.23236	2.6935	3.81006	3.18139	4.65465
WNT100	clone 2	8.5	94	3.12167	4.19555	2.85758	3.7909	3.38575	4.60019
WNT100	clone 2	8.58333	91	3.04964	4.08134	2.80436	3.66529	3.29493	4.49738
WNT100	clone 2	8.66667	85	3.12249	4.07068	2.86942	3.64848	3.37557	4.49288
WNT100	clone 2	8.75	93	2.85468	3.85679	2.60921	3.45742	3.10014	4.25616
WNT100	clone 2	8.83333	89	2.89266	3.76766	2.65591	3.3823	3.1294	4.15303
WNT100	clone 2	8.91667	89	3.01982	3.87413	2.75796	3.46553	3.28168	4.28273
WNT100	clone 2	9	89	3.03797	3.98201	2.8051	3.614	3.27084	4.35001
WNT100	clone 2	9.08333	89	2.84902	4.05784	2.63482	3.64815	3.06322	4.46753
WNT100	clone 2	9.16667	89	2.77027	3.90583	2.53061	3.52501	3.00993	4.28665
WNT100	clone 2	9.25	88	3.01885	4.06149	2.78836	3.66271	3.24934	4.46028
WNT100	clone 2	9.33333	90	2.84408	4.04413	2.60375	3.64498	3.08442	4.44329
WNT100	clone 2	9.41667	92	3.03415	4.2546	2.80251	3.85909	3.26579	4.6501
WNT100	clone 2	9.5	92	2.77863	4.01512	2.53224	3.63325	3.02501	4.39699
WNT100	clone 2	9.58333	91	3.05931	4.00603	2.80376	3.64626	3.31486	4.36579
WNT100	clone 2	9.66667	94	2.87199	4.05279	2.61411	3.68804	3.12987	4.41754
WNT100	clone 2	9.75	91	2.82014	4.05059	2.57452	3.64018	3.06575	4.461
WNT100	clone 2	9.83333	93	2.89309	4.13772	2.65208	3.73449	3.13409	4.54095
WNT100	clone 2	9.91667	89	2.98305	4.008	2.72329	3.61869	3.24281	4.3973
WNT100	clone 2	10	88	2.85844	3.99731	2.59758	3.58421	3.1193	4.41042
WNT100	clone 2	10.0833	90	2.84038	3.8892	2.60505	3.46929	3.07572	4.30911
WNT100	clone 2	10.1667	87	3.05471	4.01966	2.79786	3.57139	3.31155	4.46793
WNT100	clone 2	10.25	87	2.82078	3.84471	2.58411	3.40828	3.05745	4.28114
WNT100	clone 2	10.3333	93	2.86998	3.97674	2.63566	3.56537	3.10429	4.38811
WNT100	clone 2	10.4167	89	2.89305	3.85102	2.62704	3.432	3.15907	4.27003
WNT100	clone 2	10.5	89	3.08017	3.90339	2.8108	3.5052	3.34955	4.30157
WNT100	clone 2	10.5833	84	2.85021	3.84536	2.59748	3.42233	3.10295	4.26838
WNT100	clone 2	10.6667	89	2.97085	3.76847	2.6986	3.34904	3.2431	4.1879
WNT100	clone 2	10.75	98	2.86983	3.71441	2.61027	3.30814	3.1294	4.12068
WNT100	clone 2	10.8333	89	2.76704	3.68433	2.52242	3.26468	3.01165	4.10399
WNT100	clone 2	10.9167	86	2.88899	3.73886	2.59833	3.30444	3.17964	4.17329
WNT100	clone 2	11	88	2.99841	3.85724	2.70806	3.42446	3.28876	4.29001
WNT100	clone 2	11.0833	92	2.8937	3.82007	2.62874	3.3743	3.15866	4.26585
WNT100	clone 2	11.1667	91	2.83007	3.75756	2.5831	3.31092	3.07704	4.20419
WNT100	clone 2	11.25	88	2.93149	3.77243	2.65423	3.37904	3.20875	4.16582
WNT100	clone 2	11.3333	93	2.75158	3.74311	2.52216	3.35046	2.98101	4.13576
WNT100	clone 2	11.4167	90	3.03707	3.88249	2.7686	3.44969	3.30554	4.31529
WNT100	clone 2	11.5	91	2.97727	3.8271	2.6913	3.36438	3.26325	4.28981
WNT100	clone 2	11.5833	95	2.93046	3.76224	2.65682	3.36602	3.2041	4.15846
WNT100	clone 2	11.6667	91	2.75336	3.61747	2.52681	3.22581	2.9799	4.00913
WNT100	clone 2	11.75	91	2.24132	2.8631	1.9827	2.50677	2.49995	3.21942
WNT100	clone 2	11.8333	98	3.04503	3.84915	2.7701	3.43323	3.31996	4.26508
WNT100	clone 2	11.9167	91	2.85249	3.9678	2.60367	3.52992	3.10131	4.40567
WNT100	clone 2	12	99	2.8547	4.01418	2.62929	3.60825	3.08012	4.4201
WNT100	clone 3	-0.583333	50	0.925529	0.966761	0.833686	0.784229	1.01737	1.14929
WNT100	clone 3	-0.5	52	1.04887	0.964899	0.91334	0.799396	1.18439	1.1304
WNT100	clone 3	-0.416667	47	1.04566	0.991837	0.941922	0.817527	1.1494	1.16615
WNT100	clone 3	-0.333333	48	1.06494	1.04102	0.956607	0.847311	1.17326	1.23473
WNT100	clone 3	-0.25	54	0.975182	0.958402	0.852133	0.795951	1.09823	1.12085
WNT100	clone 3	-0.166667	50	1.03192	1.08402	0.921839	0.917662	1.142	1.25037
WNT100	clone 3	-0.0833333	54	0.9197	0.999027	0.807392	0.828173	1.03201	1.16988
WNT100	clone 3	0	55	0.811305	0.83326	0.704111	0.67419	0.918498	0.99233
WNT100	clone 3	0.0833333	52	0.971625	0.991919	0.864855	0.81967	1.0784	1.16417
WNT100	clone 3	0.25	81	0.97433	1.34894	0.905563	1.21854	1.0431	1.47934
WNT100	clone 3	0.333333	85	1.00414	1.31653	0.948743	1.19783	1.05954	1.43523
WNT100	clone 3	0.416667	79	1.07042	1.30632	0.994741	1.20593	1.1461	1.40671
WNT100	clone 3	0.5	82	1.1272	1.34859	1.0389	1.22063	1.21551	1.47654
WNT100	clone 3	0.583333	85	1.0521	1.43133	0.983826	1.31546	1.12037	1.5472
WNT100	clone 3	0.666667	87	1.19822	1.46311	1.11898	1.33185	1.27746	1.59437
WNT100	clone 3	0.75	90	1.15142	1.41655	1.08523	1.28657	1.2176	1.54653
WNT100	clone 3	0.833333	91	1.16272	1.48689	1.08906	1.33596	1.23639	1.63781
WNT100	clone 3	0.916667	87	1.20841	1.55543	1.11981	1.39744	1.29701	1.71341
WNT100	clone 3	1	92	1.20703	1.63971	1.12575	1.49913	1.28832	1.78029
WNT100	clone 3	1.08333	83	1.30108	1.62246	1.2096	1.46879	1.39257	1.77613
WNT100	clone 3	1.16667	80	1.26652	1.62415	1.17584	1.50158	1.3572	1.74672
WNT100	clone 3	1.25	83	1.36487	1.78092	1.27006	1.64448	1.45967	1.91736
WNT100	clone 3	1.33333	81	1.40314	1.81381	1.31484	1.66878	1.49144	1.95883
WNT100	clone 3	1.41667	83	1.413	1.81951	1.31441	1.68909	1.51159	1.94993
WNT100	clone 3	1.5	86	1.46378	1.85627	1.38022	1.72673	1.54734	1.9858
WNT100	clone 3	1.58333	88	1.49466	1.94283	1.40641	1.80821	1.58291	2.07745
WNT100	clone 3	1.66667	86	1.48814	2.02909	1.38894	1.88655	1.58734	2.17164
WNT100	clone 3	1.75	88	1.51753	2.02022	1.43229	1.9006	1.60278	2.13984
WNT100	clone 3	1.83333	93	1.63685	2.03258	1.53313	1.9002	1.74057	2.16496
WNT100	clone 3	1.91667	94	1.56234	2.04867	1.43282	1.9293	1.69187	2.16803
WNT100	clone 3	2	90	1.50822	2.14207	1.39559	2.02282	1.62085	2.26132
WNT100	clone 3	2.08333	90	1.60297	2.1906	1.52114	2.07187	1.68481	2.30933
WNT100	clone 3	2.16667	90	1.58813	2.21324	1.49	2.08208	1.68626	2.34439
WNT100	clone 3	2.25	85	1.63822	2.35966	1.52612	2.21026	1.75033	2.50906
WNT100	clone 3	2.33333	92	1.69792	2.28932	1.59412	2.14414	1.80173	2.43451
WNT100	clone 3	2.41667	89	1.72946	2.34565	1.61253	2.19403	1.84638	2.49727
WNT100	clone 3	2.5	86	1.70378	2.50098	1.6142	2.35344	1.79335	2.64852
WNT100	clone 3	2.58333	84	1.71365	2.47646	1.59734	2.30165	1.82996	2.65127
WNT100	clone 3	2.66667	88	1.85853	2.55206	1.74077	2.34777	1.97629	2.75636
WNT100	clone 3	2.75	81	1.81965	2.60689	1.70832	2.42645	1.93099	2.78732
WNT100	clone 3	2.83333	86	1.83366	2.59574	1.73088	2.41986	1.93643	2.77162
WNT100	clone 3	2.91667	90	1.96944	2.65147	1.8645	2.47821	2.07439	2.82473
WNT100	clone 3	3	93	1.79774	2.7202	1.67492	2.55911	1.92057	2.8813
WNT100	clone 3	3.08333	90	1.97252	2.74264	1.8301	2.59667	2.11495	2.88862
WNT100	clone 3	3.16667	90	1.86181	2.74057	1.73932	2.5543	1.98431	2.92685
WNT100	clone 3	3.25	96	2.05873	2.93384	1.96263	2.75351	2.15483	3.11417
WNT100	clone 3	3.33333	84	1.88554	2.88208	1.73397	2.68647	2.03712	3.07769
WNT100	clone 3	3.41667	87	1.86679	2.87119	1.74502	2.67564	1.98856	3.06674
WNT100	clone 3	3.5	89	2.01641	2.89003	1.88472	2.69952	2.1481	3.08054
WNT100	clone 3	3.58333	89	2.00266	2.87698	1.89063	2.71741	2.1147	3.03655
WNT100	clone 3	3.66667	92	1.98527	2.90606	1.86725	2.68463	2.10329	3.1275
WNT100	clone 3	3.75	89	2.00441	2.97014	1.85626	2.77554	2.15256	3.16474
WNT100	clone 3	3.83333	87	2.04579	2.98919	1.92227	2.79862	2.16932	3.17976
WNT100	clone 3	3.91667	93	2.00557	3.01415	1.86365	2.8185	2.14749	3.2098
WNT100	clone 3	4	90	2.09362	3.02569	1.9741	2.84139	2.21315	3.20999
WNT100	clone 3	4.08333	99	2.03454	3.05428	1.91299	2.8753	2.15609	3.23326
WNT100	clone 3	4.16667	91	2.19049	3.18762	2.01935	3.02802	2.36163	3.34722
WNT100	clone 3	4.25	100	2.16032	3.10605	1.99568	2.92334	2.32496	3.28875
WNT100	clone 3	4.33333	88	2.13882	3.14487	2.01548	2.98768	2.26216	3.30206
WNT100	clone 3	4.41667	85	2.13209	3.16658	1.96574	2.98989	2.29844	3.34327
WNT100	clone 3	4.5	82	2.202	3.16283	2.07061	2.96947	2.3334	3.35618
WNT100	clone 3	4.58333	86	2.20389	3.16346	2.06423	2.97983	2.34356	3.34708
WNT100	clone 3	4.66667	83	2.12285	3.08559	1.97618	2.88913	2.26952	3.28205
WNT100	clone 3	4.75	85	2.27465	3.07223	2.14382	2.87657	2.40547	3.26789
WNT100	clone 3	4.83333	88	2.1875	3.07231	2.03577	2.85578	2.33923	3.28885
WNT100	clone 3	4.91667	90	2.13286	3.04112	1.99484	2.82604	2.27088	3.25619
WNT100	clone 3	5	86	2.1172	3.00827	1.99495	2.83094	2.23945	3.18561
WNT100	clone 3	5.08333	80	2.20769	3.05885	2.05899	2.83436	2.35639	3.28334
WNT100	clone 3	5.16667	91	2.19556	3.13035	2.06514	2.94254	2.32598	3.31816
WNT100	clone 3	5.25	86	2.21734	3.27437	2.08257	3.06386	2.35212	3.48488
WNT100	clone 3	5.33333	85	2.22317	3.23542	2.07882	3.03867	2.36752	3.43217
WNT100	clone 3	5.41667	84	2.1126	3.25619	1.98178	3.04911	2.24343	3.46328
WNT100	clone 3	5.5	83	2.25256	3.27269	2.11077	3.08929	2.39435	3.45608
WNT100	clone 3	5.58333	83	2.29729	3.35834	2.13687	3.16672	2.4577	3.54996
WNT100	clone 3	5.66667	87	2.12158	3.29238	1.96556	3.11002	2.27759	3.47475
WNT100	clone 3	5.75	81	2.30394	3.30228	2.14237	3.11314	2.46551	3.49141
WNT100	clone 3	5.83333	82	2.36635	3.3705	2.23302	3.17324	2.49968	3.56776
WNT100	clone 3	5.91667	87	2.41903	3.37688	2.26649	3.18198	2.57157	3.57179
WNT100	clone 3	6	83	2.38561	3.45989	2.22891	3.26416	2.54232	3.65562
WNT100	clone 3	6.08333	84	2.23233	3.22177	2.07536	3.01933	2.3893	3.42421
WNT100	clone 3	6.16667	78	2.41246	3.35147	2.24507	3.14209	2.57985	3.56085
WNT100	clone 3	6.25	82	2.40284	3.36248	2.2362	3.12801	2.56947	3.59694
WNT100	clone 3	6.33333	82	2.34578	3.30817	2.18068	3.08567	2.51088	3.53068
WNT100	clone 3	6.41667	79	2.45776	3.46334	2.29922	3.23603	2.6163	3.69065
WNT100	clone 3	6.5	77	2.21678	3.41557	2.03212	3.17844	2.40144	3.6527
WNT100	clone 3	6.58333	84	2.37561	3.52364	2.23404	3.30841	2.51718	3.73888
WNT100	clone 3	6.66667	81	2.2619	3.39773	2.09203	3.16025	2.43178	3.6352
WNT100	clone 3	6.75	84	2.11569	3.46645	1.94826	3.24297	2.28313	3.68994
WNT100	clone 3	6.83333	82	2.28497	3.41685	2.11124	3.16579	2.4587	3.66792
WNT100	clone 3	6.91667	81	2.56299	3.485	2.38223	3.24069	2.74375	3.7293
WNT100	clone 3	7	79	2.40124	3.46489	2.21913	3.19066	2.58336	3.73913
WNT100	clone 3	7.08333	79	2.204	3.39997	2.0044	3.12843	2.40359	3.67152
WNT100	clone 3	7.16667	90	2.47159	3.35539	2.29533	3.09197	2.64784	3.6188
WNT100	clone 3	7.25	87	2.3831	3.39759	2.19872	3.14103	2.56748	3.65415
WNT100	clone 3	7.33333	79	2.40805	3.41647	2.22783	3.14697	2.58827	3.68598
WNT100	clone 3	7.41667	73	2.41692	3.51436	2.20229	3.24266	2.63155	3.78606
WNT100	clone 3	7.5	85	2.49313	3.52238	2.32502	3.29483	2.66125	3.74994
WNT100	clone 3	7.58333	80	2.26715	3.442	2.07245	3.16692	2.46185	3.71709
WNT100	clone 3	7.66667	77	2.4334	3.32979	2.24961	3.04381	2.6172	3.61577
WNT100	clone 3	7.75	78	2.36842	3.47634	2.16443	3.19963	2.5724	3.75304
WNT100	clone 3	7.83333	82	2.30928	3.59451	2.11315	3.33809	2.50541	3.85093
WNT100	clone 3	7.91667	84	2.44544	3.51738	2.278	3.27933	2.61287	3.75543
WNT100	clone 3	8	80	2.38271	3.60128	2.19501	3.35383	2.57041	3.84873
WNT100	clone 3	8.08333	74	2.35409	3.54609	2.1891	3.27946	2.51907	3.81271
WNT100	clone 3	8.16667	84	2.43541	3.44562	2.26041	3.16739	2.61041	3.72385
WNT100	clone 3	8.25	80	2.559	3.47283	2.35486	3.18565	2.76313	3.76
WNT100	clone 3	8.33333	80	2.47125	3.48906	2.31794	3.22533	2.62455	3.75279
WNT100	clone 3	8.41667	77	2.39143	3.34612	2.22847	3.05614	2.55439	3.63611
WNT100	clone 3	8.5	75	2.20353	3.37357	1.9976	3.08	2.40946	3.66714
WNT100	clone 3	8.58333	87	2.48374	3.32825	2.32693	3.08291	2.64054	3.57359
WNT100	clone 3	8.66667	80	2.36451	3.25568	2.19234	3.00464	2.53667	3.50671
WNT100	clone 3	8.75	84	2.4731	3.4473	2.30094	3.19268	2.64526	3.70192
WNT100	clone 3	8.83333	93	2.42253	3.54858	2.2423	3.31325	2.60276	3.7839
WNT100	clone 3	8.91667	81	2.46797	3.49409	2.25477	3.23614	2.68117	3.75205
WNT100	clone 3	9	88	2.57365	3.51472	2.38778	3.26315	2.75951	3.76629
WNT100	clone 3	9.08333	86	2.48714	3.26722	2.30294	2.98593	2.67133	3.54851
WNT100	clone 3	9.16667	85	2.35607	3.27072	2.14373	3.00077	2.56841	3.54067
WNT100	clone 3	9.25	88	2.29842	3.46272	2.11506	3.19216	2.48179	3.73328
WNT100	clone 3	9.33333	86	2.38102	3.45286	2.1833	3.19413	2.57873	3.7116
WNT100	clone 3	9.41667	87	2.42233	3.35791	2.23165	3.09498	2.61301	3.62084
WNT100	clone 3	9.5	86	2.30087	3.37854	2.11665	3.08894	2.48509	3.66814
WNT100	clone 3	9.58333	91	2.42687	3.30411	2.25519	3.02685	2.59855	3.58136
WNT100	clone 3	9.66667	91	2.5324	3.42982	2.35939	3.16715	2.70541	3.69249
WNT100	clone 3	9.75	85	2.3308	3.2209	2.15884	2.94186	2.50276	3.49995
WNT100	clone 3	9.83333	90	2.33653	3.20897	2.14155	2.9218	2.5315	3.49615
WNT100	clone 3	9.91667	86	2.5483	3.36281	2.36632	3.08515	2.73028	3.64046
WNT100	clone 3	10	87	2.4237	3.26643	2.22807	2.97337	2.61933	3.55949
WNT100	clone 3	10.0833	92	2.57584	3.27104	2.38362	2.97836	2.76807	3.56373
WNT100	clone 3	10.1667	89	2.41023	3.27283	2.18388	2.98654	2.63657	3.55911
WNT100	clone 3	10.25	85	2.28355	3.32154	2.08368	3.05682	2.48343	3.58626
WNT100	clone 3	10.3333	87	2.47929	3.36229	2.28643	3.08126	2.67216	3.64332
WNT100	clone 3	10.4167	91	2.34144	3.33471	2.14394	3.05987	2.53894	3.60954
WNT100	clone 3	10.5	97	2.50388	3.30408	2.32474	3.03575	2.68302	3.57242
WNT100	clone 3	10.5833	93	2.32873	3.32341	2.13976	3.05849	2.5177	3.58833
WNT100	clone 3	10.6667	89	2.4666	3.24235	2.24735	2.94752	2.68584	3.53719
WNT100	clone 3	10.75	91	2.25495	3.33662	2.01809	3.05746	2.49181	3.61577
WNT100	clone 3	10.8333	89	2.48994	3.39946	2.2864	3.0922	2.69349	3.70672
WNT100	clone 3	10.9167	92	2.53463	3.25029	2.32486	2.94239	2.7444	3.55819
WNT100	clone 3	11	93	2.52468	3.28947	2.33399	3.00623	2.71537	3.57271
WNT100	clone 3	11.0833	91	2.31012	3.19224	2.11633	2.90967	2.50392	3.4748
WNT100	clone 3	11.1667	83	2.61775	3.40485	2.40908	3.04915	2.82641	3.76055
WNT100	clone 3	11.25	84	2.50966	3.35212	2.27869	3.01084	2.74064	3.69341
WNT100	clone 3	11.3333	91	2.36626	3.18606	2.15862	2.89275	2.57389	3.47937
WNT100	clone 3	11.4167	90	2.40841	3.1314	2.20288	2.81991	2.61394	3.44289
WNT100	clone 3	11.5	93	2.38584	3.23236	2.14833	2.89969	2.62335	3.56504
WNT100	clone 3	11.5833	89	2.49959	3.28929	2.27181	2.98025	2.72737	3.59833
WNT100	clone 3	11.6667	91	2.49621	3.23753	2.27798	2.91526	2.71444	3.55979
WNT100	clone 3	11.75	87	2.40703	3.2038	2.2166	2.90093	2.59746	3.50666
WNT100	clone 3	11.8333	91	2.40788	3.08765	2.18961	2.76521	2.62616	3.4101
WNT100	clone 3	11.9167	92	2.38151	3.1746	2.16915	2.84839	2.59388	3.50081
WNT100	clone 3	12	90	2.39639	3.24243	2.21088	2.92817	2.5819	3.55668
